# Supplementary material for: The GUL-1 Protein Binds Multiple RNAs Involved in Cell Wall Remodeling and Affects the MAK-1 Pathway in Neurospora crassa
Source: PubMed Central journal article supplement (PMC10512220; doi:10.3389/ffunb.2021.672696), 2021-04-16
Supplement: Image_1.pdf [file Image_1.pdf]

A.

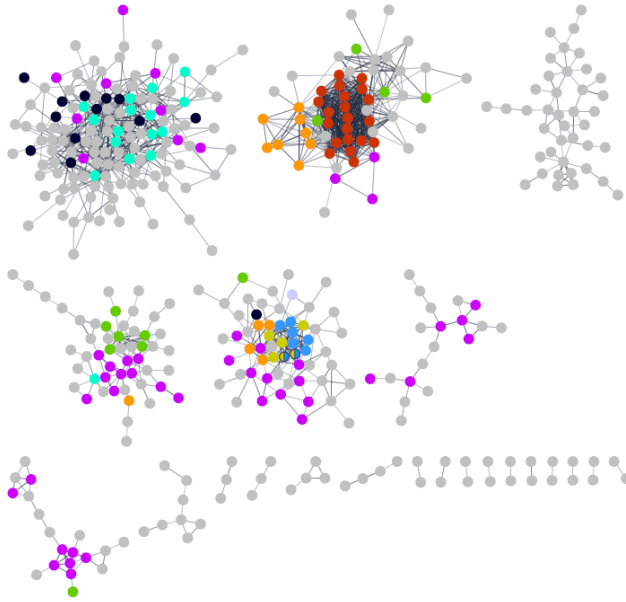

Nodes= 422  
Edges= 1289

- Ribosom
- Metabolic pathways
- Oxidative phosphorylation
- Propanoate metabolism
- Protein processing in the ER
- Autophagy
- TCA cycle
- MAPK signaling pathway
- Biosynthesis of Antibiotics

B.

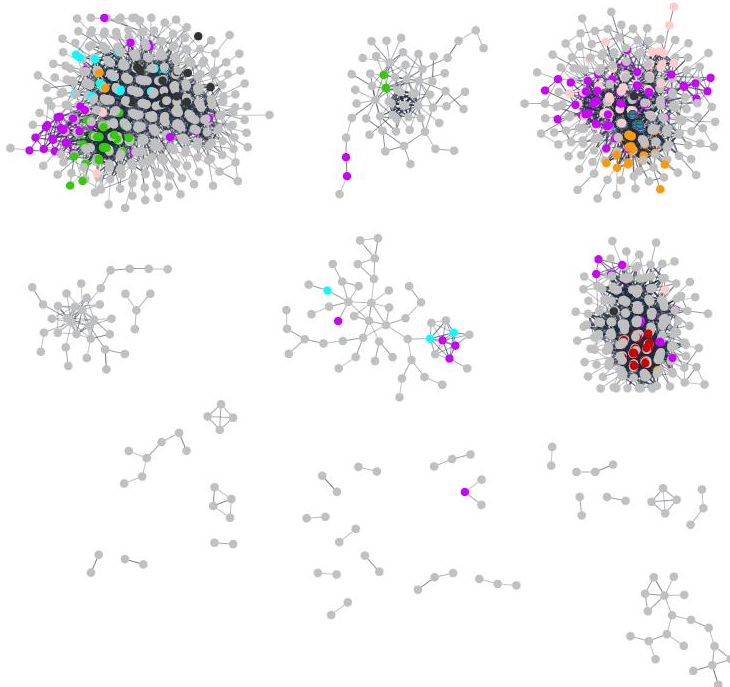

Nodes= 1360  
Edges= 9695
