# Supplementary material for: The GUL-1 Protein Binds Multiple RNAs Involved in Cell Wall Remodeling and Affects the MAK-1 Pathway in Neurospora crassa
Source: Front Fungal Biol. 2021 Apr 16;2:672696. doi: 10.3389/ffunb.2021.672696 (PMC10512220; doi:10.3389/ffunb.2021.672696)
Supplement: Supplementary Table 3 — N. crassa transcripts containing the complete or one mismatch of the yeast Ssd1-binding 5' UTR motif. [file Table_3.xlsx]

## Sheet: 11 matches
	list of the seed occurrences in the transcripts, their position, number of matches (11) and occurrence:
	5'UTR Motif yeast
			RNAseq RIP
ID	MOTIF	DESCRIPTION	Vs enrichment	Nikkomycin Z enrichment
NCU08056	jgi|Neucr2|435|NCU08056T0 79 11 AGTCATTCCTT	ABC drug exporter AtrF
NCU02612	jgi|Neucr2|1211|NCU02612T0 7 11 AGTCATTCCTT	starvation-1
NCU00846	jgi|Neucr2|2272|NCU00846T0 43 11 AGTCATTCCTT	hypothetical protein
NCU03357	jgi|Neucr2|3311|NCU03357T1 64 11 AGTCATTCCTT	ubiquitin-conjugating enzyme-16	EnrichedGFP
NCU05404	jgi|Neucr2|3399|NCU05404T0 424 11 ATTCATTCCTT	glycosyl hydrolase unclassified family-2		EnrichedGFP
NCU01697	jgi|Neucr2|3723|NCU01697T0 338 11 ATTCATTCCTT	hypothetical protein		EnrichedGFP
NCU16690	jgi|Neucr2|5326|NCU16690T0 319 11 ATTCATTCCTT	hypothetical protein
NCU06983	jgi|Neucr2|6883|NCU06983T0 232 11 AGTCATTCCTT	hypothetical protein		EnrichedGFP
NCU09686	jgi|Neucr2|7412|NCU09686T0 3253 11 ATTCATTCCTT	clock-controlled protein 8		EnrichedGFP
NCU03645	jgi|Neucr2|7624|NCU03645T0 121 11 ATTCATTCCTT	hypothetical protein		EnrichedGFP
NCU01206	jgi|Neucr2|8037|NCU01206T0 221 11 ATTCATTCCTT	histone-lysine N-methyltransferase		EnrichedGFP
NCU09556	jgi|Neucr2|8418|NCU09556T0 1152 11 ATTCATTCCTT	hypothetical protein
NCU03954	jgi|Neucr2|9572|NCU03954T1 1071 11 ATTCATTCCTT	tubulin gamma chain, tubulin gamma chain, variant
NCU03954	jgi|Neucr2|9573|NCU03954T0 1187 11 ATTCATTCCTT	tubulin gamma chain, tubulin gamma chain, variant
NCU10747	jgi|Neucr2|10715|NCU10747T0 197 11 ATTCATTCCTT	hypothetical protein		EnrichedGFP

## Sheet: 10 matches
	list when allowing one mismatch (i.e. at least 10 matches):
	5'UTR Motif yeast
			RNAseq RIP
ID	MOTIF	DESCRIPTION	Vs enrichment	Nikkomycin Z enrichment
NCU08051	jgi|Neucr2|429|NCU08051T0 1385 10 AGTCATTACTT	hypothetical protein		EnrichedGFP
NCU08056	jgi|Neucr2|435|NCU08056T0 79 11 AGTCATTCCTT	ABC drug exporter AtrF
NCU08090	jgi|Neucr2|469|NCU08090T0 104 10 AGTCATTCTTT	hypothetical protein	EnrichedGFP	EnrichedGFP
NCU07479	jgi|Neucr2|539|NCU07479T0 1592 10 ATTCATTCGTT	hypothetical protein
NCU07455	jgi|Neucr2|564|NCU07455T0 795 10 AGTCTTTCCTT	hypothetical protein
NCU07454	jgi|Neucr2|565|NCU07454T0 1994 10 ATTCAATCCTT	MAC1 interacting protein 1
NCU09068	jgi|Neucr2|599|NCU09068T0 2730 10 AGTCATTCCGT	nitrogen catabolic enzyme regulatory protein		EnrichedGFP
NCU02159	jgi|Neucr2|672|NCU02159T0 76 10 AGGCATTCCTT	hypothetical protein
NCU02159	jgi|Neucr2|672|NCU02159T0 80 10 ATTCCTTCCTT	hypothetical protein
NCU02125	jgi|Neucr2|711|NCU02125T0 526 10 GTTCATTCCTT	hypothetical protein
NCU02091	jgi|Neucr2|753|NCU02091T0 14 10 ATTCATTGCTT	ER glycosyl hydrolase		EnrichedGFP
NCU02087	jgi|Neucr2|758|NCU02087T0 737 10 AGTCATTCCCT	hypothetical protein
NCU02063	jgi|Neucr2|786|NCU02063T0 2901 10 ATTCATTCCTC	mitochondrial intermediate peptidase		EnrichedGFP
NCU02036	jgi|Neucr2|813|NCU02036T0 2194 10 AGTCATTCCTC	tRNA-splicing endonuclease	EnrichedGFP
NCU02030	jgi|Neucr2|819|NCU02030T0 1105 10 ATTCACTCCTT	hypothetical protein
NCU02002	jgi|Neucr2|847|NCU02002T0 1292 10 ACTCATTCCTT	hypothetical protein
NCU01989	jgi|Neucr2|861|NCU01989T0 565 10 TTTCATTCCTT	hypothetical protein
NCU01978	jgi|Neucr2|873|NCU01978T0 23 10 AGTCAATCCTT	hypothetical protein	EnrichedGFP	EnrichedGFP
NCU01977	jgi|Neucr2|874|NCU01977T1 2729 10 AGTCATCCCTT	urea transporter, urea transporter, variant	EnrichedWT	EnrichedGFP
NCU01977	jgi|Neucr2|875|NCU01977T0 2045 10 AGTCATCCCTT	urea transporter, urea transporter, variant	EnrichedWT	EnrichedGFP
NCU01965	jgi|Neucr2|890|NCU01965T0 187 10 ATTCATTGCTT	valyl-tRNA synthetase
NCU01964	jgi|Neucr2|891|NCU01964T0 3659 10 ATTCATTCTTT	RING-9 protein		EnrichedGFP
NCU01926	jgi|Neucr2|931|NCU01926T1 43 10 AGCCATTCCTT	hypothetical protein, hypothetical protein, variant
NCU01926	jgi|Neucr2|932|NCU01926T0 43 10 AGCCATTCCTT	hypothetical protein, hypothetical protein, variant
NCU02481	jgi|Neucr2|1055|NCU02481T0 369 10 ATTCATTCATT	mitochondrial 2-methylisocitrate lyase		EnrichedGFP
NCU02498	jgi|Neucr2|1074|NCU02498T0 3474 10 TGTCATTCCTT	Cullin-3		EnrichedGFP
NCU02526	jgi|Neucr2|1104|NCU02526T0 383 10 AGTCGTTCCTT	hypothetical protein	EnrichedGFP	EnrichedGFP
NCU02612	jgi|Neucr2|1211|NCU02612T0 7 11 AGTCATTCCTT	starvation-1
NCU02618	jgi|Neucr2|1217|NCU02618T0 454 10 AGTCATTCCTC	Peroxisomal membrane protein	EnrichedGFP		Ortholog(s) have role in cellular response to calcium ion, cellular response to heat, cellular response to oxidative stress, positive regulation of cellular response to oxidative stress and cytosol, nucleus localization
NCU02628	jgi|Neucr2|1228|NCU02628T0 764 10 ATTCATTCCTC	hypothetical protein		EnrichedGFP
NCU02655	jgi|Neucr2|1255|NCU02655T0 1652 10 CTTCATTCCTT	hypothetical protein
NCU02656	jgi|Neucr2|1256|NCU02656T0 2295 10 ATTCATTCCTA	hypothetical protein
NCU02671	jgi|Neucr2|1272|NCU02671T0 114 10 ATTTATTCCTT	cutinase G-box binding protein	EnrichedGFP	EnrichedGFP
NCU02678	jgi|Neucr2|1280|NCU02678T0 422 10 ATTCGTTCCTT	hypothetical protein
NCU02683	jgi|Neucr2|1286|NCU02683T0 2757 10 ATTCATTCCAT	hypothetical protein
NCU02688	jgi|Neucr2|1291|NCU02688T0 208 10 AGTAATTCCTT	ubiquitin-conjugating enzyme-10
NCU02688	jgi|Neucr2|1292|NCU02688T1 146 10 AGTAATTCCTT	ubiquitin-conjugating enzyme-10
NCU02694	jgi|Neucr2|1299|NCU02694T0 2364 10 ATTCGTTCCTT	hypothetical protein
NCU02718	jgi|Neucr2|1322|NCU02718T1 3201 10 ATTCTTTCCTT	hypothetical protein, hypothetical protein, variant 1, hypothetical protein, variant 2
NCU02718	jgi|Neucr2|1323|NCU02718T2 2488 10 ATTCTTTCCTT	hypothetical protein, hypothetical protein, variant 1, hypothetical protein, variant 2
NCU02724	jgi|Neucr2|1330|NCU02724T0 191 10 ATTCCTTCCTT	transcription factor-21		EnrichedGFP
NCU02739	jgi|Neucr2|1349|NCU02739T0 299 10 TTTCATTCCTT	transcription factor-8		EnrichedGFP
NCU03059	jgi|Neucr2|1497|NCU03059T0 30 10 ATTCATTCCTC	SIR2 family histone deacetylase		EnrichedGFP
NCU03070	jgi|Neucr2|1511|NCU03070T0 628 10 AGTCACTCCTT	hypothetical protein, hypothetical protein, variant		EnrichedGFP
NCU03071	jgi|Neucr2|1512|NCU03071T0 642 10 ATACATTCCTT	MAP kinase kinase kinase SskB		EnrichedGFP
NCU16386	jgi|Neucr2|1536|NCU16386T0 141 10 ATTCGTTCCTT	hypothetical protein
NCU03091	jgi|Neucr2|1537|NCU03091T0 206 10 ATTCATTCTTT	hypothetical protein		EnrichedGFP
NCU03115	jgi|Neucr2|1562|NCU03115T1 4312 10 ATTCATTCATT	spa2-like protein, spa2-like protein, variant		EnrichedGFP
NCU03115	jgi|Neucr2|1563|NCU03115T0 4317 10 ATTCATTCATT	spa2-like protein, spa2-like protein, variant		EnrichedGFP
NCU03118	jgi|Neucr2|1569|NCU03118T0 1543 10 CTTCATTCCTT	hypothetical protein	EnrichedGFP	EnrichedGFP
NCU03145	jgi|Neucr2|1599|NCU03145T0 1957 10 AGTCATTCGTT	oxidative stress resistance	EnrichedGFP	EnrichedGFP
NCU03159	jgi|Neucr2|1615|NCU03159T0 1730 10 ATTCCTTCCTT	exoribonuclease-3
NCU03166	jgi|Neucr2|1622|NCU03166T0 173 10 AGTCATTCGTT	phosphoribosylaminoimidazole-succinocarboxamide synthase
NCU03222	jgi|Neucr2|1690|NCU03222T0 1280 10 ATTCCTTCCTT	hypothetical protein, hypothetical protein, variant	EnrichedGFP	EnrichedGFP
NCU03222	jgi|Neucr2|1691|NCU03222T1 1072 10 ATTCCTTCCTT	hypothetical protein, hypothetical protein, variant	EnrichedGFP	EnrichedGFP
NCU03263	jgi|Neucr2|1731|NCU03263T0 1296 10 ACTCATTCCTT	Transmembrane protein		EnrichedGFP
NCU03265	jgi|Neucr2|1734|NCU03265T0 31 10 AGTCAATCCTT	hypothetical protein, hypothetical protein, variant
NCU03265	jgi|Neucr2|1735|NCU03265T1 31 10 AGTCAATCCTT	hypothetical protein, hypothetical protein, variant
NCU10507	jgi|Neucr2|1784|NCU10507T0 21 10 ATTCATTCATT	hypothetical protein
NCU03307	jgi|Neucr2|1790|NCU03307T0 1145 10 AGTCATTCCTC	hypothetical protein
NCU08379	jgi|Neucr2|1877|NCU08379T0 94 10 CTTCATTCCTT	hypothetical protein		EnrichedGFP
NCU08338	jgi|Neucr2|1929|NCU08338T0 950 10 AGTCATTCCTG	hypothetical protein
NCU16405	jgi|Neucr2|1938|NCU16405T0 166 10 AGTCATTCTTT	hypothetical protein	EnrichedGFP	EnrichedGFP
NCU09193	jgi|Neucr2|1941|NCU09193T0 194 10 ATTCGTTCCTT	hypothetical protein
NCU09193	jgi|Neucr2|1941|NCU09193T0 1673 10 ATTCATTGCTT	hypothetical protein
NCU09202	jgi|Neucr2|1951|NCU09202T0 2855 10 AGACATTCCTT	protein kinase dsk1, protein kinase dsk1, variant 1, protein kinase dsk1, variant 2		EnrichedGFP
NCU09202	jgi|Neucr2|1952|NCU09202T1 3029 10 AGACATTCCTT	protein kinase dsk1, protein kinase dsk1, variant 1, protein kinase dsk1, variant 2		EnrichedGFP
NCU09202	jgi|Neucr2|1953|NCU09202T2 2623 10 AGACATTCCTT	protein kinase dsk1, protein kinase dsk1, variant 1, protein kinase dsk1, variant 2		EnrichedGFP
NCU07414	jgi|Neucr2|2002|NCU07414T0 147 10 AGTCATTCCGT	DnaJ family protein		EnrichedGFP
NCU07388	jgi|Neucr2|2032|NCU07388T0 1211 10 ATGCATTCCTT	hypothetical protein	EnrichedGFP	EnrichedGFP
NCU07359	jgi|Neucr2|2063|NCU07359T0 205 10 AGTCATTCGTT	hypothetical protein		EnrichedGFP
NCU07358	jgi|Neucr2|2064|NCU07358T0 1883 10 ATTCATGCCTT	hypothetical protein
NCU07352	jgi|Neucr2|2069|NCU07352T0 465 10 ATTCCTTCCTT	hypothetical protein, hypothetical protein, variant
NCU07352	jgi|Neucr2|2070|NCU07352T1 401 10 ATTCCTTCCTT	hypothetical protein, hypothetical protein, variant
NCU07347	jgi|Neucr2|2075|NCU07347T1 838 10 ATTCATTCCGT	endo-beta-1,3-glucanase, endo-beta-1,3-glucanase, variant
NCU07347	jgi|Neucr2|2076|NCU07347T0 838 10 ATTCATTCCGT	endo-beta-1,3-glucanase, endo-beta-1,3-glucanase, variant
NCU09876	jgi|Neucr2|2093|NCU09876T0 1433 10 TGTCATTCCTT	hypothetical protein
NCU09874	jgi|Neucr2|2095|NCU09874T0 1626 10 TTTCATTCCTT	hypothetical protein	EnrichedWT	EnrichedGFP
NCU00929	jgi|Neucr2|2178|NCU00929T0 604 10 ATTCATTCCAT	hypothetical protein	EnrichedGFP
NCU00927	jgi|Neucr2|2180|NCU00927T0 3322 10 AGTCATTCATT	kinesin-5		EnrichedGFP
NCU00904	jgi|Neucr2|2206|NCU00904T0 2155 10 ATTCCTTCCTT	D-lactate dehydrogenase
NCU00890	jgi|Neucr2|2221|NCU00890T0 260 10 ATACATTCCTT	Beta-mannosidase
NCU00881	jgi|Neucr2|2231|NCU00881T1 310 10 AGTCACTCCTT	Hyphal anastamosis-7 protein, variant
NCU00881	jgi|Neucr2|2232|NCU00881T0 310 10 AGTCACTCCTT
NCU00846	jgi|Neucr2|2272|NCU00846T0 43 11 AGTCATTCCTT	hypothetical protein
NCU00826	jgi|Neucr2|2294|NCU00826T0 1033 10 ATCCATTCCTT	hypothetical protein
NCU00824	jgi|Neucr2|2296|NCU00824T0 1472 10 AGTCCTTCCTT	histone deacetylase RPD3		EnrichedGFP
NCU00812	jgi|Neucr2|2305|NCU00812T0 2231 10 AGGCATTCCTT	exosome exonuclease-3
NCU00811	jgi|Neucr2|2306|NCU00811T0 136 10 AGCCATTCCTT	hypothetical protein	EnrichedGFP	EnrichedGFP
NCU00754	jgi|Neucr2|2369|NCU00754T0 1686 10 ATTCGTTCCTT	multidrug resistant protein		EnrichedGFP
NCU11095	jgi|Neucr2|2373|NCU11095T0 720 10 ATTCATTCCTC	hypothetical protein
NCU00744	jgi|Neucr2|2380|NCU00744T0 808 10 ATTCATTACTT	hypothetical protein	EnrichedGFP	EnrichedGFP
NCU00717	jgi|Neucr2|2410|NCU00717T0 4628 10 AGTCATTCCAT	DUF1212 domain membrane protein		EnrichedGFP
NCU00699	jgi|Neucr2|2428|NCU00699T0 804 10 ATTGATTCCTT	hypothetical protein
NCU00668	jgi|Neucr2|2462|NCU00668T0 3008 10 AATCATTCCTT	rho guanyl nucleotide exchange factor		EnrichedGFP
NCU00618	jgi|Neucr2|2521|NCU00618T0 1206 10 AGTCATTGCTT	40S ribosomal protein S27		EnrichedGFP
NCU00614	jgi|Neucr2|2526|NCU00614T0 3552 10 ATTCACTCCTT	DUF1620 domain-containing protein		EnrichedGFP
NCU00607	jgi|Neucr2|2531|NCU00607T0 514 10 ATTCACTCCTT	hypothetical protein
NCU00583	jgi|Neucr2|2558|NCU00583T0 262 10 AGTCCTTCCTT	hypothetical protein
NCU00565	jgi|Neucr2|2579|NCU00565T0 2526 10 ATTCATTCGTT	lipoic acid-1
NCU00550	jgi|Neucr2|2596|NCU00550T1 293 10 ATTCATCCCTT	hypothetical protein	EnrichedGFP	EnrichedGFP
NCU00550	jgi|Neucr2|2597|NCU00550T0 291 10 ATTCATCCCTT		EnrichedGFP	EnrichedGFP
NCU00545	jgi|Neucr2|2603|NCU00545T0 706 10 AGTCATTCGTT	hypothetical protein	EnrichedGFP	EnrichedGFP
NCU03045	jgi|Neucr2|2663|NCU03045T0 96 10 ATTCATTCATT	cellular morphogenesis protein	EnrichedGFP	EnrichedGFP
NCU02955	jgi|Neucr2|2750|NCU02955T0 281 10 AGTCACTCCTT	elongation factor G 1		EnrichedGFP
NCU02934	jgi|Neucr2|2773|NCU02934T0 62 10 ATCCATTCCTT	hypothetical protein	EnrichedGFP
NCU02834	jgi|Neucr2|2863|NCU02834T0 2745 10 ATTCATTCATT	hypothetical protein		EnrichedGFP
NCU02834	jgi|Neucr2|2863|NCU02834T0 2749 10 ATTCATTCCAT			EnrichedGFP
NCU02810	jgi|Neucr2|2880|NCU02810T0 1314 10 ATTCGTTCCTT	eukaryotic translation initiation factor 2 gamma subunit	EnrichedWT	EnrichedGFP
NCU02796	jgi|Neucr2|2896|NCU02796T1 22 10 AGTCATTCATT	PHD finger domain-containing protein		EnrichedGFP
NCU09269	jgi|Neucr2|2939|NCU09269T0 49 10 ATTCATTCCCT	GTP-binding nuclear protein GSP1/Ran
NCU09250	jgi|Neucr2|2959|NCU09250T0 786 10 ATTCATTCCAT	hypothetical protein
NCU08602	jgi|Neucr2|2992|NCU08602T0 984 10 ATTCATTGCTT	hypothetical protein
NCU08607	jgi|Neucr2|2998|NCU08607T0 1716 10 AGTCCTTCCTT	endoplasmic reticulum-Golgi intermediate compartment protein 3		EnrichedGFP
NCU08610	jgi|Neucr2|3001|NCU08610T0 1244 10 ATTCATCCCTT	hypothetical protein	EnrichedGFP	EnrichedGFP
NCU08640	jgi|Neucr2|3038|NCU08640T0 867 10 AGTCATTCTTT	hypothetical protein
NCU08642	jgi|Neucr2|3040|NCU08642T0 3626 10 ATTCATTCCTA	cyclic nucleotide-binding domain-containing protein	EnrichedGFP	EnrichedGFP
NCU08642	jgi|Neucr2|3041|NCU08642T1 3617 10 ATTCATTCCTA		EnrichedGFP	EnrichedGFP
NCU09613	jgi|Neucr2|3064|NCU09613T0 1569 10 ATTCGTTCCTT	hypothetical protein
NCU09597	jgi|Neucr2|3078|NCU09597T0 173 10 CGTCATTCCTT	hypothetical protein
NCU03573	jgi|Neucr2|3093|NCU03573T0 647 10 AGTCATGCCTT	hypothetical protein	EnrichedGFP	EnrichedGFP
NCU03573	jgi|Neucr2|3093|NCU03573T0 4611 10 AGTCGTTCCTT		EnrichedGFP	EnrichedGFP
NCU03526	jgi|Neucr2|3143|NCU03526T1 1909 10 ATTCATTCCTG	ubiquitin-activating enzyme E1 3
NCU03526	jgi|Neucr2|3144|NCU03526T0 1850 10 ATTCATTCCTG
NCU03489	jgi|Neucr2|3179|NCU03489T1 358 10 AGTCATTTCTT	COL-21
NCU03489	jgi|Neucr2|3180|NCU03489T0 359 10 AGTCATTTCTT
NCU03425	jgi|Neucr2|3240|NCU03425T0 352 10 AGTCATTCATT	threonine-2	EnrichedGFP	EnrichedGFP
NCU03425	jgi|Neucr2|3240|NCU03425T0 356 10 ATTCATTTCTT		EnrichedGFP	EnrichedGFP
NCU03380	jgi|Neucr2|3286|NCU03380T0 210 10 AGTCATGCCTT	ATP-dependent rRNA helicase spb-4
NCU03362	jgi|Neucr2|3305|NCU03362T0 72 10 ATTCATTCATT	steroid alpha reductase		EnrichedGFP
NCU03357	jgi|Neucr2|3311|NCU03357T1 64 11 AGTCATTCCTT	ubiquitin-conjugating enzyme-16	EnrichedGFP
NCU05340	jgi|Neucr2|3348|NCU05340T0 2527 10 AGTCATGCCTT	alkanesulfonate oxygenase-1		EnrichedGFP
NCU05386	jgi|Neucr2|3385|NCU05386T0 140 10 ATGCATTCCTT	hypothetical protein		EnrichedGFP
NCU16534	jgi|Neucr2|3393|NCU16534T0 321 10 AGACATTCCTT	MFS monocarboxylic acid transporter		EnrichedGFP
NCU05393	jgi|Neucr2|3394|NCU05393T0 1988 10 ATTCATTCCAT	hypothetical protein
NCU05400	jgi|Neucr2|3397|NCU05400T0 4513 10 AGTCCTTCCTT	hypothetical protein		EnrichedGFP
NCU05404	jgi|Neucr2|3399|NCU05404T0 424 11 ATTCATTCCTT	glycosyl hydrolase unclassified family-2	EnrichedWT	EnrichedGFP
NCU06757	jgi|Neucr2|3543|NCU06757T0 2433 10 CTTCATTCCTT	DNA polymerase Tau
NCU06739	jgi|Neucr2|3564|NCU06739T0 415 10 CTTCATTCCTT	peptidyl-prolyl isomerase-7
NCU01821	jgi|Neucr2|3599|NCU01821T0 328 10 ATTCCTTCCTT	alanine-glyoxylate aminotransferase
NCU01820	jgi|Neucr2|3600|NCU01820T0 268 10 ATTCATTCCAT	exportin-1
NCU01818	jgi|Neucr2|3603|NCU01818T0 144 10 AGTCAGTCCTT	hypothetical protein		EnrichedGFP
NCU01813	jgi|Neucr2|3609|NCU01813T0 2131 10 ATTCATGCCTT	high affinity glucose transporter		EnrichedGFP
NCU01804	jgi|Neucr2|3618|NCU01804T0 2385 10 ATTCATCCCTT	nudix/MutT family protein
NCU16557	jgi|Neucr2|3638|NCU16557T0 278 10 AGTCATTCATT	hypothetical protein
NCU16557	jgi|Neucr2|3638|NCU16557T0 282 10 ATTCATTCTTT	hypothetical protein
NCU01769	jgi|Neucr2|3662|NCU01769T0 875 10 CTTCATTCCTT	hypothetical protein
NCU01725	jgi|Neucr2|3705|NCU01725T0 1733 10 ATTCAGTCCTT	hypothetical protein
NCU01697	jgi|Neucr2|3723|NCU01697T0 338 11 ATTCATTCCTT	hypothetical protein		EnrichedGFP
NCU01659	jgi|Neucr2|3754|NCU01659T2 260 10 ATTCATTTCTT	dDENN domain-containing protein	EnrichedGFP	EnrichedGFP
NCU01659	jgi|Neucr2|3755|NCU01659T1 260 10 ATTCATTTCTT		EnrichedGFP	EnrichedGFP
NCU01658	jgi|Neucr2|3758|NCU01658T0 3817 10 AGTCATTCCTA	WD repeat protein	EnrichedGFP
NCU01632	jgi|Neucr2|3784|NCU01632T0 4629 10 AGTCATTCCCT	Pentafunctional arom polypeptide
NCU01584	jgi|Neucr2|3816|NCU01584T0 154 10 ATTCATTCATT	hypothetical protein	EnrichedGFP	EnrichedGFP
NCU01572	jgi|Neucr2|3823|NCU01572T0 2132 10 ATTCATTTCTT	WD domain-containing protein
NCU01566	jgi|Neucr2|3829|NCU01566T0 48 10 ATTCATTCGTT	hypothetical protein
NCU01535	jgi|Neucr2|3861|NCU01535T0 129 10 ATTCATTCATT	PEX33		EnrichedGFP
NCU01535	jgi|Neucr2|3861|NCU01535T0 133 10 ATTCATTCATT			EnrichedGFP
NCU01523	jgi|Neucr2|3873|NCU01523T0 135 10 ATTCATTCGTT	guanine triphosphate binding-11	EnrichedGFP	EnrichedGFP
NCU01503	jgi|Neucr2|3891|NCU01503T0 2806 10 ATTCATTCTTT	rRNA maturation-8
NCU01491	jgi|Neucr2|3903|NCU01491T0 419 10 AGTCCTTCCTT	hypothetical protein
NCU01485	jgi|Neucr2|3912|NCU01485T0 1534 10 ATTCTTTCCTT	hypothetical protein
NCU08516	jgi|Neucr2|3923|NCU08516T0 1212 10 ATTCATTCCCT	aldose epimerase-1
NCU08501	jgi|Neucr2|3942|NCU08501T0 12563 10 AGGCATTCCTT	ubiquitin-11
NCU08456	jgi|Neucr2|3973|NCU08456T1 102 10 TGTCATTCCTT	hypothetical protein, hypothetical protein, variant
NCU08456	jgi|Neucr2|3973|NCU08456T1 106 10 ATTCCTTCCTT
NCU08456	jgi|Neucr2|3974|NCU08456T0 102 10 TGTCATTCCTT
NCU08456	jgi|Neucr2|3974|NCU08456T0 106 10 ATTCCTTCCTT
NCU08706	jgi|Neucr2|3991|NCU08706T0 252 10 AGTCATTCCTC	AAA family ATPase
NCU08721	jgi|Neucr2|4004|NCU08721T0 1500 10 AGTCATTCCTG	hypothetical protein
NCU08735	jgi|Neucr2|4019|NCU08735T0 1152 10 GGTCATTCCTT	hypothetical protein
NCU08443	jgi|Neucr2|4080|NCU08443T0 91 10 ATTCTTTCCTT	hypothetical protein		EnrichedGFP
NCU09480	jgi|Neucr2|4161|NCU09480T0 1124 10 ATTCATTTCTT	heme/steroid binding domain-containing protein
NCU09484	jgi|Neucr2|4167|NCU09484T0 1885 10 ATTAATTCCTT	hypothetical protein
NCU11405	jgi|Neucr2|4202|NCU11405T0 2207 10 ATTCCTTCCTT	alpha-1,3-glucanase/mutanase
NCU09506	jgi|Neucr2|4203|NCU09506T0 87 10 ATTCATTCTTT	hypothetical protein
NCU09155	jgi|Neucr2|4222|NCU09155T0 714 10 ATTCTTTCCTT	hypothetical protein		EnrichedGFP
NCU09184	jgi|Neucr2|4254|NCU09184T0 1463 10 CGTCATTCCTT	indoleamine dioxygenase-1
NCU05683	jgi|Neucr2|4295|NCU05683T0 145 10 ATTCATTCATT	Dihydroxy-acid dehydratase		EnrichedGFP
NCU05704	jgi|Neucr2|4316|NCU05704T0 92 10 ATTCATTCTTT	hypothetical protein
NCU05718	jgi|Neucr2|4333|NCU05718T1 45 10 AGTCATTCCAT	Telomere binding protein
NCU07837	jgi|Neucr2|4373|NCU07837T0 2686 10 AGTCATTACTT	DNA repair protein Rhp26/Rad26
NCU07855	jgi|Neucr2|4394|NCU07855T0 255 10 AGTCATACCTT	hypothetical protein
NCU07861	jgi|Neucr2|4400|NCU07861T0 2301 10 AGTCTTTCCTT	hypothetical protein
NCU07881	jgi|Neucr2|4422|NCU07881T0 2297 10 ATTCATTCCTG	hypothetical protein		EnrichedGFP
NCU06412	jgi|Neucr2|4441|NCU06412T0 26 10 ATTCATTTCTT	hypothetical protein
NCU06467	jgi|Neucr2|4503|NCU06467T1 794 10 AGTCATTCATT	hypothetical protein	EnrichedGFP	EnrichedGFP
NCU16638	jgi|Neucr2|4533|NCU16638T0 178 10 AGTAATTCCTT	hypothetical protein
NCU06509	jgi|Neucr2|4548|NCU06509T0 229 10 ATTCTTTCCTT	hypothetical protein	EnrichedGFP	EnrichedGFP
NCU06509	jgi|Neucr2|4549|NCU06509T1 141 10 ATTCTTTCCTT		EnrichedGFP	EnrichedGFP
NCU06186	jgi|Neucr2|4569|NCU06186T0 2444 10 AGTCATCCCTT	hypothetical protein
NCU06206	jgi|Neucr2|4593|NCU06206T1 142 10 ATTCATTCATT	hypothetical protein	EnrichedGFP	EnrichedGFP
NCU06206	jgi|Neucr2|4593|NCU06206T1 146 10 ATTCATTCATT		EnrichedGFP	EnrichedGFP
NCU06206	jgi|Neucr2|4594|NCU06206T0 115 10 ATTCATTCATT		EnrichedGFP	EnrichedGFP
NCU06206	jgi|Neucr2|4594|NCU06206T0 119 10 ATTCATTCATT		EnrichedGFP	EnrichedGFP
NCU11312	jgi|Neucr2|4617|NCU11312T0 607 10 AGTCATCCCTT	CorA family metal ion transporter	EnrichedGFP	EnrichedGFP
NCU06255	jgi|Neucr2|4651|NCU06255T0 2030 10 ATTCTTTCCTT	hypothetical protein	EnrichedGFP	EnrichedGFP
NCU06272	jgi|Neucr2|4673|NCU06272T0 1795 10 AGCCATTCCTT	mitochondrial ribosomal protein-72
NCU00019	jgi|Neucr2|4699|NCU00019T0 3099 10 ATTAATTCCTT	FKH1
NCU00034	jgi|Neucr2|4715|NCU00034T1 560 10 AGTCCTTCCTT	prenyl cysteine carboxyl methyltransferase Ste14		EnrichedGFP
NCU00034	jgi|Neucr2|4716|NCU00034T0 657 10 AGTCCTTCCTT			EnrichedGFP
NCU00040	jgi|Neucr2|4724|NCU00040T0 3813 10 ATTCATTCATT	eukaryotic translation initiation factor 3 110 kDa subunit	EnrichedGFP	EnrichedGFP
NCU00151	jgi|Neucr2|4854|NCU00151T0 1711 10 AGTCAGTCCTT	hypothetical protein
NCU00154	jgi|Neucr2|4858|NCU00154T0 206 10 AGTCATTCCTC	xaa-Pro dipeptidase		EnrichedGFP
NCU00168	jgi|Neucr2|4874|NCU00168T0 1260 10 AGTCATTCCTA	glycerophospholipid-2	EnrichedGFP	EnrichedGFP
NCU00178	jgi|Neucr2|4884|NCU00178T0 156 10 ATTGATTCCTT	RNA polymerase-26
NCU00203	jgi|Neucr2|4911|NCU00203T0 250 10 AGTCATTCCTC	SIR2 family histone deacetylase	EnrichedGFP
NCU00239	jgi|Neucr2|4953|NCU00239T1 6705 10 AGTCATTCATT	AMP binding domain-containing protein	EnrichedGFP	EnrichedGFP
NCU00239	jgi|Neucr2|4954|NCU00239T0 6640 10 AGTCATTCATT		EnrichedGFP	EnrichedGFP
NCU00265	jgi|Neucr2|4983|NCU00265T0 805 10 AGTCATTCTTT	hypothetical protein		EnrichedGFP
NCU00267	jgi|Neucr2|4985|NCU00267T0 430 10 AGTCATTCCGT	hypothetical protein
NCU00340	jgi|Neucr2|5067|NCU00340T0 381 10 ACTCATTCCTT	transcription factor steA	EnrichedGFP	EnrichedGFP
NCU11180	jgi|Neucr2|5109|NCU11180T0 130 10 ATTCTTTCCTT	patatin-like phospholipase domain-containing protein	EnrichedGFP
NCU00396	jgi|Neucr2|5126|NCU00396T0 2645 10 ATCCATTCCTT	pre-mRNA-splicing factor rse-1
NCU00396	jgi|Neucr2|5127|NCU00396T1 2772 10 ATCCATTCCTT
NCU00410	jgi|Neucr2|5146|NCU00410T0 1484 10 AGTCCTTCCTT	eukaryotic release factor 1		EnrichedGFP
NCU00421	jgi|Neucr2|5159|NCU00421T0 1295 10 AGTCATTCCTG	SWI-SNF complex subunit		EnrichedGFP
NCU00432	jgi|Neucr2|5170|NCU00432T0 41 10 AGTCATTCATT	hypothetical protein,	EnrichedGFP	EnrichedGFP
NCU00432	jgi|Neucr2|5171|NCU00432T1 41 10 AGTCATTCATT		EnrichedGFP	EnrichedGFP
NCU00469	jgi|Neucr2|5212|NCU00469T0 1192 10 GTTCATTCCTT	alpha-tubulin suppressor protein Aats1
NCU00493	jgi|Neucr2|5239|NCU00493T0 1998 10 TGTCATTCCTT	coatomer subunit delta	EnrichedWT	EnrichedGFP
NCU00497	jgi|Neucr2|5243|NCU00497T1 76 10 AGACATTCCTT	hypothetical protein		EnrichedGFP
NCU08980	jgi|Neucr2|5256|NCU08980T0 64 10 AGTCATTCCTC	alternative NADH-dehydrogenase		EnrichedGFP
NCU08985	jgi|Neucr2|5261|NCU08985T0 718 10 CTTCATTCCTT	protein tyrosine phosphatase
NCU07565	jgi|Neucr2|5321|NCU07565T0 3700 10 ATTCACTCCTT	von Willebrand RING finger domain-containing protein	EnrichedGFP	EnrichedGFP
NCU16690	jgi|Neucr2|5326|NCU16690T0 319 11 ATTCATTCCTT	hypothetical protein
NCU07516	jgi|Neucr2|5377|NCU07516T0 194 10 ATTCATTGCTT	RING finger membrane protein		EnrichedGFP
NCU07516	jgi|Neucr2|5377|NCU07516T0 1341 10 ATTCCTTCCTT			EnrichedGFP
NCU07516	jgi|Neucr2|5377|NCU07516T0 3437 10 ATTCATACCTT			EnrichedGFP
NCU08191	jgi|Neucr2|5387|NCU08191T0 656 10 AGTCATGCCTT	hypothetical protein
NCU11286	jgi|Neucr2|5395|NCU11286T0 1239 10 ATGCATTCCTT	hypothetical protein
NCU10210	jgi|Neucr2|5405|NCU10210T0 728 10 AGTCATTCCTC	hypothetical protein
NCU08257	jgi|Neucr2|5450|NCU08257T0 192 10 ATTCATTCCAT	hypothetical protein
NCU08521	jgi|Neucr2|5522|NCU08521T0 757 10 AGTCATTCGTT	hypothetical protein
NCU08792	jgi|Neucr2|5529|NCU08792T0 268 10 TGTCATTCCTT	hypothetical protein		EnrichedGFP
NCU09639	jgi|Neucr2|5588|NCU09639T0 1506 10 TTTCATTCCTT	hypothetical protein
NCU07583	jgi|Neucr2|5622|NCU07583T0 106 10 AGTCATTCTTT	hypothetical protein		EnrichedGFP
NCU07593	jgi|Neucr2|5633|NCU07593T0 383 10 ATTCATTCGTT	hypothetical protein
NCU07654	jgi|Neucr2|5700|NCU07654T0 1868 10 TTTCATTCCTT	pre-mRNA polyadenylation factor fip-1		EnrichedGFP
NCU04874	jgi|Neucr2|5727|NCU04874T0 1479 10 AGTCATTCGTT	alternative oxidase
NCU04883	jgi|Neucr2|5740|NCU04883T0 390 10 ATTCATTCGTT	chitinase 1 (gh18-4)
NCU04883	jgi|Neucr2|5740|NCU04883T0 455 10 CTTCATTCCTT
NCU04932	jgi|Neucr2|5797|NCU04932T0 877 10 AGTCATTCTTT	hypothetical protein		EnrichedGFP
NCU04932	jgi|Neucr2|5798|NCU04932T1 858 10 AGTCATTCTTT			EnrichedGFP
NCU04963	jgi|Neucr2|5830|NCU04963T0 221 10 AGTCTTTCCTT	sugar transporter-9	EnrichedGFP	EnrichedGFP
NCU07965	jgi|Neucr2|5853|NCU07965T0 159 10 ATCCATTCCTT	dolichol-phosphate mannosyltransferase	EnrichedGFP	EnrichedGFP
NCU07932	jgi|Neucr2|5891|NCU07932T0 2851 10 ATTCTTTCCTT	propionate-2	EnrichedGFP	EnrichedGFP
NCU07923	jgi|Neucr2|5902|NCU07923T0 2476 10 GGTCATTCCTT
NCU06544	jgi|Neucr2|5973|NCU06544T0 2226 10 CTTCATTCCTT	protein kinase C-like protein		EnrichedGFP
NCU06554	jgi|Neucr2|5983|NCU06554T0 264 10 ACTCATTCCTT
NCU06557	jgi|Neucr2|5986|NCU06557T0 3666 10 AGTCTTTCCTT	hypothetical protein		EnrichedGFP
NCU06572	jgi|Neucr2|6000|NCU06572T0 678 10 AGGCATTCCTT	hypothetical protein
NCU06628	jgi|Neucr2|6057|NCU06628T0 116 10 ATTCCTTCCTT	SH3 domain-containing protein	EnrichedGFP	EnrichedGFP
NCU16769	jgi|Neucr2|6062|NCU16769T0 135 10 AGTCATGCCTT	monooxygenase-6
NCU07700	jgi|Neucr2|6126|NCU07700T0 3086 10 ATTCCTTCCTT	translation elongation factor aEF-2		EnrichedGFP
NCU08297	jgi|Neucr2|6220|NCU08297T0 2150 10 CTTCATTCCTT	cell division control protein 3	EnrichedGFP	EnrichedGFP
NCU08297	jgi|Neucr2|6221|NCU08297T1 1792 10 CTTCATTCCTT		EnrichedGFP	EnrichedGFP
NCU08283	jgi|Neucr2|6233|NCU08283T0 685 10 ATTCATTCCTC	integral membrane channel protein
NCU06390	jgi|Neucr2|6268|NCU06390T0 81 10 TTTCATTCCTT	hypothetical protein	EnrichedGFP
NCU06360	jgi|Neucr2|6304|NCU06360T0 186 10 AGTCATTCATT	Histidinol-phosphate aminotransferase	EnrichedGFP
NCU06334	jgi|Neucr2|6331|NCU06334T1 2653 10 ATTCATTACTT	hypothetical protein, hypothetical protein, variant
NCU06334	jgi|Neucr2|6332|NCU06334T0 2498 10 ATTCATTACTT
NCU06294	jgi|Neucr2|6373|NCU06294T0 5645 10 AGTCGTTCCTT	hypothetical protein
NCU06285	jgi|Neucr2|6380|NCU06285T0 3519 10 ATTCATACCTT	dipeptidase-5	EnrichedGFP	EnrichedGFP
NCU04436	jgi|Neucr2|6486|NCU04436T0 35 10 ATTCATTCTTT	hypothetical protein
NCU04419	jgi|Neucr2|6504|NCU04419T0 107 10 AGTCATACCTT	2-oxoglutarate-dependent ethylene/succinate-forming enzyme		EnrichedGFP
NCU04376	jgi|Neucr2|6557|NCU04376T0 1718 10 ATTCCTTCCTT	hypothetical protein
NCU07991	jgi|Neucr2|6623|NCU07991T0 1704 10 ATTAATTCCTT	DUF292 domain-containing protein
NCU08029	jgi|Neucr2|6666|NCU08029T0 1512 10 ATTCATTACTT	thiamine pyrophosphokinase
NCU07297	jgi|Neucr2|6802|NCU07297T0 66 10 TTTCATTCCTT	hypothetical protein		EnrichedGFP
NCU16857	jgi|Neucr2|6808|NCU16857T0 373 10 ATTCATTTCTT	hypothetical protein
NCU06983	jgi|Neucr2|6883|NCU06983T0 232 11 AGTCATTCCTT	hypothetical protein		EnrichedGFP
NCU06986	jgi|Neucr2|6886|NCU06986T0 2071 10 AGCCATTCCTT	DUF221 domain-containing protein	EnrichedGFP	EnrichedGFP
NCU06986	jgi|Neucr2|6887|NCU06986T1 1718 10 AGCCATTCCTT		EnrichedGFP	EnrichedGFP
NCU06989	jgi|Neucr2|6890|NCU06989T0 1307 10 AATCATTCCTT	hypothetical protein
NCU08833	jgi|Neucr2|6965|NCU08833T0 44 10 ATTCATTGCTT	hypothetical protein
NCU08830	jgi|Neucr2|6967|NCU08830T0 623 10 AGTCATTCCTC	hypothetical protein
NCU08805	jgi|Neucr2|6992|NCU08805T0 43 10 ATTCAGTCCTT	hypothetical protein
NCU05313	jgi|Neucr2|7023|NCU05313T0 924 10 AGACATTCCTT	mitochondria fission 1 protein	EnrichedGFP
NCU05306	jgi|Neucr2|7029|NCU05306T0 374 10 CTTCATTCCTT	hypothetical protein		EnrichedGFP
NCU05286	jgi|Neucr2|7049|NCU05286T0 183 10 TGTCATTCCTT	hypothetical protein
NCU05286	jgi|Neucr2|7050|NCU05286T1 99 10 TGTCATTCCTT
NCU05194	jgi|Neucr2|7156|NCU05194T0 69 10 AGTCAGTCCTT	DNA replication licensing factor Mcm6		EnrichedGFP
NCU05193	jgi|Neucr2|7157|NCU05193T0 1247 10 AGTCATTTCTT	hypothetical protein		EnrichedGFP
NCU08867	jgi|Neucr2|7223|NCU08867T1 196 10 ATTCCTTCCTT	hypothetical protein
NCU08867	jgi|Neucr2|7224|NCU08867T0 196 10 ATTCCTTCCTT	hypothetical protein
NCU08922	jgi|Neucr2|7352|NCU08922T0 96 10 ATTCATTCATT	hypothetical protein
NCU08922	jgi|Neucr2|7352|NCU08922T0 100 10 ATTCATTCCTA
NCU09686	jgi|Neucr2|7412|NCU09686T0 3253 11 ATTCATTCCTT	clock-controlled protein 8		EnrichedGFP
NCU04675	jgi|Neucr2|7435|NCU04675T0 1126 10 ATTCATTCATT	hypothetical protein		EnrichedGFP
NCU04645	jgi|Neucr2|7468|NCU04645T0 412 10 ATTCATTCCTC			EnrichedGFP
NCU04637	jgi|Neucr2|7479|NCU04637T0 60 10 ATTCGTTCCTT	BAR adaptor protein RVS167
NCU04610	jgi|Neucr2|7511|NCU04610T0 254 10 ATTCATTCATT	oxysterol-binding protein-3		EnrichedGFP
NCU04610	jgi|Neucr2|7511|NCU04610T0 258 10 ATTCATTCATT			EnrichedGFP
NCU03584	jgi|Neucr2|7569|NCU03584T0 2887 10 AGTCTTTCCTT	Polyketide synthase
NCU03584	jgi|Neucr2|7569|NCU03584T0 3798 10 AGTTATTCCTT
NCU03591	jgi|Neucr2|7574|NCU03591T0 148 10 ATTCATTCCTC	ATP-dependent bile acid permease		EnrichedGFP
NCU03613	jgi|Neucr2|7592|NCU03613T0 300 10 AGTCATTCGTT	hypothetical protein	EnrichedGFP	EnrichedGFP
NCU03645	jgi|Neucr2|7624|NCU03645T0 121 11 ATTCATTCCTT	hypothetical protein		EnrichedGFP
NCU03682	jgi|Neucr2|7654|NCU03682T0 1244 10 ATTCATTCTTT	hypothetical protein		EnrichedGFP
NCU03686	jgi|Neucr2|7659|NCU03686T1 3439 10 AGACATTCCTT	oxidase assembly protein 2	EnrichedGFP	EnrichedGFP
NCU03686	jgi|Neucr2|7660|NCU03686T0 2225 10 AGACATTCCTT		EnrichedGFP	EnrichedGFP
NCU03707	jgi|Neucr2|7679|NCU03707T0 224 10 AGTGATTCCTT	hypothetical protein
NCU03712	jgi|Neucr2|7684|NCU03712T0 26 10 ATTCATTCATT	hypothetical protein	EnrichedGFP	EnrichedGFP
NCU03785	jgi|Neucr2|7767|NCU03785T0 1616 10 ATTCAGTCCTT	hypothetical protein
NCU03797	jgi|Neucr2|7780|NCU03797T0 284 10 AGTCATTCATT	ubiquitin terminal hydrolase-7		EnrichedGFP
NCU03797	jgi|Neucr2|7780|NCU03797T0 288 10 ATTCATTCTTT			EnrichedGFP
NCU03808	jgi|Neucr2|7792|NCU03808T0 806 10 AGTCATTCCTG	pre-mRNA-splicing factor ATP-dependent RNA helicase prp16
NCU03840	jgi|Neucr2|7827|NCU03840T0 745 10 ATTCATTACTT	hypothetical protein
NCU00998	jgi|Neucr2|7832|NCU00998T0 22 10 ATTCATTCCCT	RNA polymerase-32		EnrichedGFP
NCU01043	jgi|Neucr2|7870|NCU01043T0 481 10 AGTCATTCCTC	hypothetical protein
NCU01083	jgi|Neucr2|7915|NCU01083T0 1989 10 ATACATTCCTT	S-adenosylmethionine decarboxylase		EnrichedGFP
NCU10359	jgi|Neucr2|7996|NCU10359T0 2135 10 ATTCCTTCCTT	neutral ceramidase
NCU01172	jgi|Neucr2|8001|NCU01172T0 2933 10 AGACATTCCTT	golgi-associated retrograde protein-1
NCU01193	jgi|Neucr2|8023|NCU01193T0 419 10 TTTCATTCCTT	golgi-associated retrograde protein-1	EnrichedGFP
NCU01196	jgi|Neucr2|8025|NCU01196T0 292 10 ATTCATTCTTT	hypothetical protein
NCU01197	jgi|Neucr2|8026|NCU01197T0 1157 10 AGACATTCCTT	cell wall biogenesis protein phosphatase Ssd1		EnrichedGFP
NCU01206	jgi|Neucr2|8037|NCU01206T0 221 11 ATTCATTCCTT	histone-lysine N-methyltransferase		EnrichedGFP
NCU01206	jgi|Neucr2|8037|NCU01206T0 225 10 ATTCCTTCCTT			EnrichedGFP
NCU01213	jgi|Neucr2|8045|NCU01213T0 2364 10 AGTCATTCTTT	superoxide dismutase	EnrichedGFP	EnrichedGFP
NCU01256	jgi|Neucr2|8083|NCU01256T0 173 10 ATTCCTTCCTT	glutamine amidotransferase
NCU01260	jgi|Neucr2|8089|NCU01260T0 3647 10 GTTCATTCCTT	hypothetical protein
NCU01282	jgi|Neucr2|8114|NCU01282T0 358 10 AGTAATTCCTT	vacuolar-sorting protein snf-7
NCU01291	jgi|Neucr2|8125|NCU01291T0 1294 10 AGTCATTCCTA	hypothetical protein		EnrichedGFP
NCU01292	jgi|Neucr2|8127|NCU01292T0 115 10 ATTCATTCATT	hypothetical protein
NCU01294	jgi|Neucr2|8128|NCU01294T0 1356 10 AGTCATTCTTT	hydrolase	EnrichedGFP
NCU01302	jgi|Neucr2|8139|NCU01302T0 128 10 ATTCCTTCCTT	hydrolase		EnrichedGFP
NCU01332	jgi|Neucr2|8172|NCU01332T0 212 10 ATTCATTCCAT	vacuolar ATP synthase proteolipid subunit		EnrichedGFP
NCU01348	jgi|Neucr2|8189|NCU01348T0 1968 10 ATTCGTTCCTT	putrescine-3
NCU01353	jgi|Neucr2|8194|NCU01353T0 3044 10 ATTCATTCCCT	mixed-linked glucanase	EnrichedGFP	EnrichedGFP
NCU01361	jgi|Neucr2|8202|NCU01361T0 1623 10 ATTCATTCTTT	hypothetical protein		EnrichedGFP
NCU01365	jgi|Neucr2|8205|NCU01365T0 3855 10 CGTCATTCCTT	DNA ligase-3		EnrichedGFP
NCU01379	jgi|Neucr2|8223|NCU01379T0 8672 10 CGTCATTCCTT	histone acetylase complex subunit Paf400		EnrichedGFP
NCU06681	jgi|Neucr2|8324|NCU06681T0 1047 10 CGTCATTCCTT	hypothetical protein
NCU09556	jgi|Neucr2|8418|NCU09556T0 1152 11 ATTCATTCCTT	hypothetical protein
NCU01477	jgi|Neucr2|8423|NCU01477T0 96 10 ATTCATTCGTT	hypothetical protein	EnrichedWT	EnrichedGFP
NCU01459	jgi|Neucr2|8447|NCU01459T0 333 10 AGTCATTGCTT	tan spore protein		EnrichedGFP
NCU01443	jgi|Neucr2|8468|NCU01443T0 1499 10 GTTCATTCCTT	seryl-tRNA synthetase
NCU04139	jgi|Neucr2|8542|NCU04139T0 596 10 AGCCATTCCTT	hypothetical protein
NCU04223	jgi|Neucr2|8624|NCU04223T0 152 10 ATTCATTCCGT
NCU04223	jgi|Neucr2|8624|NCU04223T0 1670 10 ATTCATTCTTT	hypothetical protein
NCU04268	jgi|Neucr2|8667|NCU04268T0 2348 10 ATTCATTCATT	hypothetical protein		EnrichedGFP
NCU04269	jgi|Neucr2|8668|NCU04269T2 2196 10 ATTCATCCCTT
NCU04269	jgi|Neucr2|8669|NCU04269T0 2377 10 ATTCATCCCTT
NCU04269	jgi|Neucr2|8670|NCU04269T1 2374 10 ATTCATCCCTT	aspartyl proteinase
NCU04299	jgi|Neucr2|8705|NCU04299T0 1015 10 AGTCATTCGTT	hypothetical protein
NCU04314	jgi|Neucr2|8719|NCU04314T0 1278 10 AATCATTCCTT	hypothetical protein		EnrichedGFP
NCU08939	jgi|Neucr2|8760|NCU08939T0 2618 10 AGTCATTGCTT	mannan polymerase II complex ANP1 subunit		EnrichedGFP
NCU08949	jgi|Neucr2|8772|NCU08949T0 221 10 ATCCATTCCTT	hypothetical protein	EnrichedGFP
NCU08959	jgi|Neucr2|8784|NCU08959T0 63 10 ATTCATTCCCT	hypothetical protein	EnrichedGFP	EnrichedGFP
NCU08961	jgi|Neucr2|8788|NCU08961T1 1318 10 AGTCAGTCCTT	hypothetical protein	EnrichedWT	EnrichedGFP
NCU08961	jgi|Neucr2|8789|NCU08961T0 932 10 AGTCAGTCCTT	hypothetical protein	EnrichedWT	EnrichedGFP
NCU07239	jgi|Neucr2|8853|NCU07239T0 260 10 ATTCATTCCTG	hypothetical protein
NCU07205	jgi|Neucr2|8886|NCU07205T0 517 10 ATTCATTACTT	nitrate transporter CRNA		EnrichedGFP
NCU07191	jgi|Neucr2|8899|NCU07191T0 2982 10 ATCCATTCCTT	hypothetical protein
NCU07158	jgi|Neucr2|8939|NCU07158T0 208 10 ACTCATTCCTT	hypothetical protein
NCU07152	jgi|Neucr2|8946|NCU07152T0 417 10 AGTCAGTCCTT	hypothetical protein
NCU07082	jgi|Neucr2|9022|NCU07082T0 3415 10 AGTCATTCATT	Aspartyl-tRNA synthetase
NCU07058	jgi|Neucr2|9056|NCU07058T0 129 10 ATTCATTCCAT	small nucleolar ribonucleoprotein complex subunit Utp14		EnrichedGFP
NCU04724	jgi|Neucr2|9100|NCU04724T0 2302 10 AGTCATGCCTT	VHS domain-containing protein		EnrichedGFP
NCU04744	jgi|Neucr2|9122|NCU04744T0 35 10 AGTCATCCCTT	dihydropicolinate synthase-2
NCU04755	jgi|Neucr2|9136|NCU04755T0 81 10 ATTCATTCCCT	protein kinase domain-containing protein ppk32
NCU04773	jgi|Neucr2|9155|NCU04773T0 199 10 AGTCGTTCCTT	hypothetical protein
NCU04796	jgi|Neucr2|9186|NCU04796T0 1819 10 ATTCATTCATT	ketoacyl thiolase-2		EnrichedGFP
NCU04800	jgi|Neucr2|9190|NCU04800T0 3884 10 ATTCATTCATT	ubiquitin-10
NCU05574	jgi|Neucr2|9356|NCU05574T0 129 10 ATTCATTCCCT	hypothetical protein
NCU05553	jgi|Neucr2|9379|NCU05553T0 1157 10 ATTCTTTCCTT	hypothetical protein
NCU05548	jgi|Neucr2|9383|NCU05548T0 669 10 AGTCATTCCTG	phospho-2-dehydro-3-deoxyheptonate aldolase
NCU03929	jgi|Neucr2|9553|NCU03929T0 1787 10 AGTCCTTCCTT		EnrichedGFP	EnrichedGFP
NCU03929	jgi|Neucr2|9553|NCU03929T0 2855 10 ATTCATTCATT	acyl-CoA synthetase-2	EnrichedGFP	EnrichedGFP
NCU03931	jgi|Neucr2|9554|NCU03931T0 2797 10 ATTCATACCTT	ADA-5
NCU03954	jgi|Neucr2|9572|NCU03954T1 1071 11 ATTCATTCCTT
NCU03954	jgi|Neucr2|9573|NCU03954T0 1187 11 ATTCATTCCTT	tubulin gamma chain
NCU04053	jgi|Neucr2|9677|NCU04053T0 53 10 ATTCATTCCGT	hypothetical protein		EnrichedGFP
NCU04080	jgi|Neucr2|9702|NCU04080T0 173 10 AGTCTTTCCTT	palmitoyltransferase SWF1		EnrichedGFP
NCU09861	jgi|Neucr2|9718|NCU09861T0 3166 10 ATTCATTGCTT
NCU09861	jgi|Neucr2|9719|NCU09861T1 2635 10 ATTCATTGCTT	serine-threonine protein phosphatase-6
NCU06013	jgi|Neucr2|9730|NCU06013T0 3096 10 ATTCAATCCTT	polyketide synthase 1		EnrichedGFP
NCU06009	jgi|Neucr2|9736|NCU06009T0 161 10 TGTCATTCCTT	oxidoreductase
NCU05990	jgi|Neucr2|9756|NCU05990T0 230 10 ATTCATTCATT		EnrichedGFP	EnrichedGFP
NCU05990	jgi|Neucr2|9756|NCU05990T0 234 10 ATTCATTCATT		EnrichedGFP	EnrichedGFP
NCU05990	jgi|Neucr2|9756|NCU05990T0 238 10 ATTCATTCATT		EnrichedGFP	EnrichedGFP
NCU05990	jgi|Neucr2|9757|NCU05990T1 230 10 ATTCATTCATT		EnrichedGFP	EnrichedGFP
NCU05990	jgi|Neucr2|9757|NCU05990T1 234 10 ATTCATTCATT		EnrichedGFP	EnrichedGFP
NCU05990	jgi|Neucr2|9757|NCU05990T1 238 10 ATTCATTCATT	cell surface receptor/MFS transporter	EnrichedGFP	EnrichedGFP
NCU10048	jgi|Neucr2|9783|NCU10048T0 160 10 ATTCATTCCGT	3-methyl-2-oxobutanoate hydroxymethyltransferase
NCU05941	jgi|Neucr2|9817|NCU05941T1 1446 10 GGTCATTCCTT			EnrichedGFP
NCU05941	jgi|Neucr2|9818|NCU05941T0 1432 10 GGTCATTCCTT	PAP2 domain-containing protein		EnrichedGFP
NCU05908	jgi|Neucr2|9851|NCU05908T0 1688 10 ATTCATTCGTT	hypothetical protein
NCU05153	jgi|Neucr2|9860|NCU05153T0 1813 10 AGTCACTCCTT	carbohydrate O-acetyltransferase	EnrichedGFP	EnrichedGFP
NCU05138	jgi|Neucr2|9876|NCU05138T0 242 10 ATTCAATCCTT	hypothetical protein
NCU05113	jgi|Neucr2|9904|NCU05113T0 31 10 AGTCATTCGTT	laccase-5
NCU05051	jgi|Neucr2|9963|NCU05051T0 1325 10 AGTCATTCATT	COL-23
NCU05013	jgi|Neucr2|10006|NCU05013T0 89 10 ACTCATTCCTT	hypothetical protein
NCU06866	jgi|Neucr2|10175|NCU06866T0 3234 10 ACTCATTCCTT	asparaginyl-tRNA synthetase
NCU06868	jgi|Neucr2|10178|NCU06868T0 3831 10 ATTCATGCCTT	Sec23/Sec24 family protein		EnrichedGFP
NCU06908	jgi|Neucr2|10227|NCU06908T0 1642 10 AGTCACTCCTT	hypothetical protein		EnrichedGFP
NCU06928	jgi|Neucr2|10250|NCU06928T0 2152 10 CGTCATTCCTT	hypothetical protein		EnrichedGFP
NCU06932	jgi|Neucr2|10257|NCU06932T0 264 10 AGCCATTCCTT	F-box domain-containing protein
NCU09564	jgi|Neucr2|10315|NCU09564T0 3848 10 AGTCATTCTTT	phosphate-repressible phosphate permease
NCU04531	jgi|Neucr2|10452|NCU04531T0 7538 10 AGTCATTCCAT	hypothetical protein		EnrichedGFP
NCU06106	jgi|Neucr2|10525|NCU06106T0 30 10 AGCCATTCCTT	hypothetical protein
NCU06073	jgi|Neucr2|10562|NCU06073T0 2532 10 AGTCCTTCCTT
NCU06073	jgi|Neucr2|10563|NCU06073T1 2532 10 AGTCCTTCCTT	hypothetical protein, hypothetical protein, variant
NCU06072	jgi|Neucr2|10564|NCU06072T0 711 10 ATCCATTCCTT
NCU06072	jgi|Neucr2|10564|NCU06072T0 1882 10 AGTCATACCTT	hypothetical protein
NCU06052	jgi|Neucr2|10586|NCU06052T0 441 10 AGTTATTCCTT
NCU06020	jgi|Neucr2|10622|NCU06020T0 139 10 ATCCATTCCTT		EnrichedGFP	EnrichedGFP
NCU06020	jgi|Neucr2|10622|NCU06020T0 1645 10 AGTCATTGCTT	Chitinase (gh18-7)	EnrichedGFP	EnrichedGFP
NCU02415	jgi|Neucr2|10672|NCU02415T0 203 10 ATTCATCCCTT	zinc metalloproteinase
NCU02394	jgi|Neucr2|10703|NCU02394T0 264 10 AGTCATTCCTA			EnrichedGFP
NCU02394	jgi|Neucr2|10703|NCU02394T0 1796 10 CTTCATTCCTT	oxidation resistance protein 1		EnrichedGFP
NCU10747	jgi|Neucr2|10715|NCU10747T0 197 11 ATTCATTCCTT	hypothetical protein		EnrichedGFP
NCU02344	jgi|Neucr2|10766|NCU02344T0 479 10 AGTCGTTCCTT	fungal cellulose binding domain-containing protein		EnrichedGFP
NCU17244	jgi|Neucr2|10784|NCU17244T0 463 10 ATTCAATCCTT	hypothetical protein
NCU02314	jgi|Neucr2|10804|NCU02314T0 2859 10 AGTCCTTCCTT	hypothetical protein
NCU02307	jgi|Neucr2|10812|NCU02307T0 2324 10 ATTCATTCCGT	hypothetical protein		EnrichedGFP
NCU10775	jgi|Neucr2|10832|NCU10775T0 586 10 AGTCATTTCTT		EnrichedGFP	EnrichedGFP
NCU10775	jgi|Neucr2|10833|NCU10775T1 317 10 AGTCATTTCTT	NADPH oxidase 2, NADPH oxidase 2, variant	EnrichedGFP	EnrichedGFP
NCU02285	jgi|Neucr2|10837|NCU02285T0 266 10 AGTCATTCCAT	hypothetical protein
NCU02254	jgi|Neucr2|10873|NCU02254T2 1651 10 AGACATTCCTT
NCU02254	jgi|Neucr2|10874|NCU02254T0 1740 10 AGACATTCCTT
NCU02254	jgi|Neucr2|10875|NCU02254T1 1736 10 AGACATTCCTT
NCU02254	jgi|Neucr2|10876|NCU02254T3 1486 10 AGACATTCCTT	tubulin-associated protein-1
NCU02242	jgi|Neucr2|10888|NCU02242T0 61 10 AGTCATTCCCT	RING finger domain-containing protein
NCU08135	jgi|Neucr2|10958|NCU08135T0 4176 10 ATTCATTCTTT	DNA mismatch repair protein msh6
NCU08174	jgi|Neucr2|11001|NCU08174T0 323 10 ATTCATGCCTT			EnrichedGFP
NCU08174	jgi|Neucr2|11001|NCU08174T0 1814 10 AGTCATTCATT	hypothetical protein		EnrichedGFP
NCU08178	jgi|Neucr2|11006|NCU08178T0 787 10 ATGCATTCCTT
NCU08178	jgi|Neucr2|11006|NCU08178T0 801 10 ATTCTTTCCTT
NCU08178	jgi|Neucr2|11006|NCU08178T0 849 10 AGGCATTCCTT	purine permease-1
NCU05789	jgi|Neucr2|11068|NCU05789T0 351 10 ATACATTCCTT	secreted glucosidase	EnrichedGFP	EnrichedGFP
NCU05808	jgi|Neucr2|11092|NCU05808T0 115 10 AGTCAATCCTT	serine/threonine protein kinase		EnrichedGFP
NCU05831	jgi|Neucr2|11118|NCU05831T0 1842 10 ATTCATTGCTT	hypothetical protein
NCU11308	jgi|Neucr2|11125|NCU11308T0 658 10 ATTCATTCATT	hypothetical protein	EnrichedGFP	EnrichedGFP
NCU05854	jgi|Neucr2|11144|NCU05854T2 2087 10 AGTCATTCGTT			EnrichedGFP
NCU05854	jgi|Neucr2|11145|NCU05854T1 2095 10 AGTCATTCGTT			EnrichedGFP
NCU05854	jgi|Neucr2|11146|NCU05854T0 2276 10 AGTCATTCGTT	hypothetical protein, hypothetical protein, variant 1, hypothetical protein, variant 2		EnrichedGFP
NCU05880	jgi|Neucr2|11172|NCU05880T0 2518 10 AGTCATCCCTT	hypothetical protein
