# Supplementary material for: The GUL-1 Protein Binds Multiple RNAs Involved in Cell Wall Remodeling and Affects the MAK-1 Pathway in Neurospora crassa
Source: Front Fungal Biol. 2021 Apr 16;2:672696. doi: 10.3389/ffunb.2021.672696 (PMC10512220; doi:10.3389/ffunb.2021.672696)
Supplement: Supplementary Table 4 — N. crassa RNA species that interact with GUL-1. [file Table_4.xlsx]

## Sheet: All
			Vs						Nikkomycin Z
NCU	ID	Gene.description	WT.log2FoldChange	WT.pvalue	WT.padj	GUL-1-GFP.log2FoldChange	GUL-1-GFP.pvalue	GUL-1-GFP.padj	WT.log2FoldChange	WT.pvalue	WT.padj	GUL-1-GFP.log2FoldChange	GUL-1-GFP.pvalue	GUL-1-GFP.padj	Vs enrichment	Nikkomycin Z enrichment		Enrichment is significant if a transcript is enriched in GUL1 GFP but not in WT
NCU08490	Q1K8Q4	hypothetical protein	-3.50241	0.0169143	0.168188	6.32115	0.00657498	0.033239	-1.9035	0.0826253	1	6.93315	4.15786e-05	0.000394343	Enriched GUL-1-GFP	Enriched GUL-1-GFP
NCU10907	A7UXG4	PEPAd	-1.17396	0.178651	0.535447	8.58538	0.000188194	0.00326265	0.955505	0.223072	1	4.43469	6.22164e-05	0.000540087	Enriched GUL-1-GFP	Enriched GUL-1-GFP
NCU01380	Q1K703	hypothetical protein	-1.09648	0.280044	0.636273	7.05104	4.81559e-05	0.00103984	0.156843	0.829243	1	7.35459	2.33473e-14	1.17515e-12	Enriched GUL-1-GFP	Enriched GUL-1-GFP
NCU07879	Q7SB14	mitochondrial metal transporter 2	-1.02214	0.174218	0.529193	6.2491	0.00513026	0.0295055	0.406525	0.571141	1	3.25498	0.000751064	0.00368657	Enriched GUL-1-GFP	Enriched GUL-1-GFP
NCU02664	V5IQV2	hypothetical protein	-0.940621	0.267357	0.619655	5.55541	0.0154774	0.048847	-0.122807	0.871109	1	0.579859	0.571585	0.652039	Enriched GUL-1-GFP
NCU04963	Q7S3Q4	high-affinity glucose transporter	-0.803474	0.669111	0.895114	17.5546	6.34569e-08	2.16852e-06	-0.867552	0.626988	1	16.1638	9.13586e-11	3.256e-09	Enriched GUL-1-GFP	Enriched GUL-1-GFP
NCU02660	Q7SH69	DUF962 domain-containing protein	-0.772884	0.180509	0.537569	5.93915	0.00563774	0.0310499	-0.296608	0.541335	1	0.455109	0.429695	0.51657	Enriched GUL-1-GFP
NCU02755	Q7SCX9	PAP2 domain-containing protein	-0.747869	0.503536	0.805987	17.6589	2.03272e-12	1.33783e-10	-0.347829	0.739171	1	23.994	2.57047e-38	5.67284e-36	Enriched GUL-1-GFP	Enriched GUL-1-GFP
NCU07333	Q7SA30	hypothetical protein	-0.656301	0.724122	0.917613	16.2909	4.61745e-07	1.43951e-05	-0.0846115	0.96228	1	15.3274	1.18158e-09	3.78764e-08	Enriched GUL-1-GFP	Enriched GUL-1-GFP
NCU08090	Q7SGJ4	hypothetical protein	-0.633418	0.467338	0.7834	6.95258	1.47522e-06	4.16105e-05	-0.204627	0.794733	1	10.273	5.21892e-10	1.75124e-08	Enriched GUL-1-GFP	Enriched GUL-1-GFP
NCU00453	Q7RXZ1	sodium/hydrogen exchanger 3	-0.624715	0.568038	0.849171	17.1849	3.93098e-12	2.49477e-10	-0.584562	0.557314	1	23.0403	1.47305e-36	2.81746e-34	Enriched GUL-1-GFP	Enriched GUL-1-GFP
NCU06366	V5IQ54	Ca2+/H+ antiporter	-0.622207	0.360404	0.706316	5.9637	0.00691993	0.0340281	-0.104156	0.864497	1	0.514409	0.486848	0.572797	Enriched GUL-1-GFP
NCU00309	Q7RZQ5	WSC domain-containing protein	-0.60419	0.344292	0.696576	4.56772	6.6811e-06	0.000167216	-0.755181	0.167205	1	9.26888	2.17942e-09	6.65187e-08	Enriched GUL-1-GFP	Enriched GUL-1-GFP
NCU08127	Q7S4K4	glycosylhydrolase family 76-3 protein	-0.578951	0.59652	0.863615	6.06858	0.0136098	0.0458908	0.64924	0.513365	1	6.03759	0.000832603	0.00397461	Enriched GUL-1-GFP	Enriched GUL-1-GFP
NCU07276	Q7S940	ABC bile acid transporter	-0.571585	0.543034	0.830616	8.0051	0.000656408	0.00790805	0.283222	0.738566	1	8.02908	2.73047e-06	4.06946e-05	Enriched GUL-1-GFP	Enriched GUL-1-GFP
NCU06206	U9W2V8	hypothetical protein	-0.544457	0.510713	0.811624	2.5973	0.0125672	0.0443532	0.386092	0.58069	1	3.91773	2.03576e-05	0.000219147	Enriched GUL-1-GFP	Enriched GUL-1-GFP
NCU00924	Q7SFC3	glycosylphosphatidylinositol transamidase 2	-0.541718	0.624039	0.874115	6.13204	0.0112058	0.0419658	-0.276371	0.775103	1	6.2295	0.000435442	0.0024071	Enriched GUL-1-GFP	Enriched GUL-1-GFP
NCU11324	V5IR65	PX domain-containing protein, variant 1	-0.538631	0.528946	0.822719	6.24763	0.00736922	0.0348749	-0.308326	0.699013	1	2.18144	0.0296307	0.0600781	Enriched GUL-1-GFP
NCU07804	Q7S1C4	hypothetical protein	-0.535346	0.456067	0.775228	5.96018	0.00690302	0.0340281	-0.41228	0.510132	1	6.0095	0.000155942	0.00110108	Enriched GUL-1-GFP	Enriched GUL-1-GFP
NCU01990	Q7SFP1	UPF0016 domain-containing protein	-0.525652	0.479843	0.791498	7.1411	0.00130752	0.0127663	-0.475713	0.467427	1	7.06683	1.02802e-05	0.000124974	Enriched GUL-1-GFP	Enriched GUL-1-GFP
NCU05561	P02807	copper metallothionein	-0.517454	0.55644	0.843094	7.48279	0.00139296	0.0133439	-0.366842	0.652749	1	-0.673139	0.464871	0.55135	Enriched GUL-1-GFP
NCU00669	Q7SHY4	oligosaccharyl transferase subunit	-0.506567	0.587121	0.856953	15.725	2.46496e-11	1.41298e-09	-0.467615	0.578013	1	22.9199	1.48244e-40	3.86648e-38	Enriched GUL-1-GFP	Enriched GUL-1-GFP
NCU04765	Q7S688	hypothetical protein	-0.486963	0.598411	0.863679	5.65956	0.0155953	0.0489628	-0.110128	0.894024	1	5.48876	0.00129119	0.00549212	Enriched GUL-1-GFP	Enriched GUL-1-GFP
NCU00450	U9W3C8	sucrose transporter	-0.481509	0.434062	0.762089	6.93304	0.00151735	0.0141242	-0.233644	0.67516	1	0.774808	0.244206	0.325797	Enriched GUL-1-GFP
NCU10237	V5IMJ9	glycerophosphoryl diester phosphodiesterase	-0.472849	0.711815	0.912678	16.5862	3.255e-10	1.67656e-08	-0.720104	0.542584	1	19.3567	7.14717e-23	6.95093e-21	Enriched GUL-1-GFP	Enriched GUL-1-GFP
NCU03152	Q7SDU0	DUF1348 domain-containing protein	-0.47109	0.702071	0.909595	17.5395	1.42729e-11	8.59759e-10	-1.13865	0.317354	1	23.6217	1.4279e-34	2.40979e-32	Enriched GUL-1-GFP	Enriched GUL-1-GFP
NCU05275	P0C224	ubiquitin fusion protein	-0.46766	0.441476	0.766507	5.31597	0.0140164	0.0462639	-0.481744	0.365336	1	-1.31653	0.0382273	0.0731648	Enriched GUL-1-GFP
NCU03253	Q7SEH4	hypothetical protein	-0.466893	0.513559	0.814537	6.17835	0.00520349	0.0296841	0.3961	0.52468	1	6.6524	2.95582e-05	0.000295479	Enriched GUL-1-GFP	Enriched GUL-1-GFP
NCU06397	V5IQ46	profilin	-0.446676	0.455526	0.775228	5.22186	0.0158606	0.0494026	-0.325361	0.543627	1	1.47895	0.110764	0.170575	Enriched GUL-1-GFP
NCU02744	Q7SGA6	60S ribosomal protein L9	-0.443949	0.344506	0.696576	7.24764	0.00063083	0.00773093	-0.520132	0.207588	1	0.504348	0.311536	0.396922	Enriched GUL-1-GFP
NCU02431	V5IKK4	RING-14 protein	-0.433241	0.590688	0.860273	6.45177	0.00441619	0.0269676	0.168331	0.811285	1	1.75369	0.0527622	0.0938759	Enriched GUL-1-GFP
NCU01068	Q1K8A1	BAR domain-containing protein	-0.430265	0.598997	0.863679	5.54708	0.0150522	0.0481509	-0.557865	0.440001	1	1.74053	0.0825173	0.13505	Enriched GUL-1-GFP
NCU04091	Q7RWL8	hypothetical protein	-0.427345	0.543026	0.830616	6.55844	0.003146	0.0229116	-0.20968	0.738987	1	1.15821	0.132579	0.196981	Enriched GUL-1-GFP
NCU06306	Q7SAC4	chromatin remodeling factor 5-1	-0.427326	0.578735	0.852855	5.84524	0.00897155	0.0381855	-0.0652565	0.921058	1	1.86122	0.0470665	0.0859541	Enriched GUL-1-GFP
NCU04122	F5HG64	malate dehydrogese	-0.420421	0.628981	0.875806	8.15165	0.000421163	0.00582418	-0.420789	0.58861	1	8.08917	1.45855e-06	2.41883e-05	Enriched GUL-1-GFP	Enriched GUL-1-GFP
NCU02328	Q7S4T6	O-methyltransferase	-0.391637	0.576454	0.851835	5.6748	0.0107287	0.0410612	-0.669681	0.291531	1	4.82024	0.00272083	0.00973932	Enriched GUL-1-GFP	Enriched GUL-1-GFP
NCU08974	Q7S2Z5	hypothetical protein	-0.34965	0.711431	0.912678	6.93711	0.00312847	0.0228541	0.180154	0.831258	1	5.65912	0.000952569	0.00439376	Enriched GUL-1-GFP	Enriched GUL-1-GFP
NCU02235	V5IMQ2	class I alpha-mannosidase 1A, variant	-0.341302	0.706789	0.910476	7.92229	0.00070858	0.00845065	-0.900378	0.278162	1	4.38615	0.00014927	0.00106797	Enriched GUL-1-GFP	Enriched GUL-1-GFP
NCU00729	Q7SEE9	hypothetical protein	-0.336874	0.609656	0.868939	6.07802	7.19855e-11	3.99745e-09	-0.216674	0.716771	1	11.9325	4.2131e-14	2.06622e-12	Enriched GUL-1-GFP	Enriched GUL-1-GFP
NCU01019	Q1K8D1	hypothetical protein	-0.322422	0.668846	0.895042	5.41331	0.0151796	0.0484707	0.436442	0.510235	1	1.47434	0.110812	0.170604	Enriched GUL-1-GFP
NCU03811	Q1K7G1	hypothetical protein	-0.311651	0.70731	0.910476	6.14432	0.00663035	0.033286	0.274257	0.711115	1	3.2288	0.00452582	0.0143794	Enriched GUL-1-GFP	Enriched GUL-1-GFP
NCU09778	Q7RVB3	cell division control protein 2	-0.29675	0.724145	0.917613	6.60437	0.00362345	0.0242677	-0.142406	0.849428	1	6.78984	3.62379e-05	0.000350056	Enriched GUL-1-GFP	Enriched GUL-1-GFP
NCU08949	V5IM17	hypothetical protein	-0.295739	0.744816	0.926923	6.62398	0.00497251	0.0292104	0.769656	0.367118	1	1.78824	0.0941084	0.149583	Enriched GUL-1-GFP
NCU03214	Q7SGV5	ER lumen protein retaining receptor	-0.28714	0.849059	0.959559	17.2036	1.72206e-09	8.16028e-08	-0.359944	0.799707	1	21.6183	9.54566e-24	1.01431e-21	Enriched GUL-1-GFP	Enriched GUL-1-GFP
NCU01136	Q1K762	hypothetical protein	-0.28247	0.761286	0.93277	4.52253	0.000483505	0.00647044	-0.00187572	0.998164	1	5.22998	4.80588e-05	0.000443346	Enriched GUL-1-GFP	Enriched GUL-1-GFP
NCU05023	Q7RX01	hypothetical protein	-0.278624	0.650696	0.885903	4.92714	4.15338e-09	1.75727e-07	0.530308	0.325493	1	5.72226	1.87771e-17	1.23842e-15	Enriched GUL-1-GFP	Enriched GUL-1-GFP
NCU01978	Q7SE82	hypothetical protein	-0.277273	0.809536	0.948198	7.03637	0.00363264	0.0242677	-0.799062	0.436985	1	8.40066	2.10528e-06	3.26489e-05	Enriched GUL-1-GFP	Enriched GUL-1-GFP
NCU00168	Q7RXP0	1-acylglycerol-3-phosphate O-acyltransferase	-0.274123	0.702483	0.909595	6.13051	0.00548626	0.0305614	-0.520713	0.413907	1	6.21278	9.34762e-05	0.00074392	Enriched GUL-1-GFP	Enriched GUL-1-GFP
NCU02573	V5IRG6	FAM96B	-0.270168	0.638778	0.882188	5.2109	0.0151931	0.0484707	-0.164579	0.736681	1	-0.17116	0.792503	0.842732	Enriched GUL-1-GFP
NCU07467	V5INX1	hypothetical protein, variant	-0.266382	0.762152	0.93277	5.61852	0.0159204	0.0494228	-0.558058	0.495257	1	4.60317	0.00679157	0.019822	Enriched GUL-1-GFP	Enriched GUL-1-GFP
NCU00447	Q7RXZ7	serine palmitoyltransferase 2	-0.26521	0.603426	0.864853	2.03996	0.0046722	0.0278141	0.228539	0.603043	1	2.99776	2.33382e-08	6.14288e-07	Enriched GUL-1-GFP	Enriched GUL-1-GFP
NCU08824	Q7S8Z1	molybdopterin binding domain-containing protein	-0.264985	0.81702	0.951292	18.87	6.75373e-14	5.71494e-12	-0.425328	0.684498	1	24.0157	4.02388e-38	8.55149e-36	Enriched GUL-1-GFP	Enriched GUL-1-GFP
NCU06626	Q7S9P0	phosphoinositide 3-kise regulatory subunit 4	-0.259814	0.703612	0.910151	5.7844	0.00868252	0.0375855	-0.40881	0.509703	1	1.39197	0.0784071	0.129282	Enriched GUL-1-GFP
NCU02526	Q7SHT7	hypothetical protein	-0.237723	0.773378	0.935729	8.51266	0.000226511	0.00367588	-0.476993	0.53339	1	7.32118	1.27183e-05	0.000147433	Enriched GUL-1-GFP	Enriched GUL-1-GFP
NCU01575	Q1K4W8	SRE complex subunit	-0.236886	0.776449	0.93666	6.66173	0.00330923	0.0235063	0.286351	0.703292	1	1.90474	0.0281263	0.0578173	Enriched GUL-1-GFP
NCU09878	Q7S236	hypothetical protein	-0.234494	0.767955	0.935729	5.91063	0.00925659	0.0388405	-0.102057	0.886204	1	5.62945	0.000626861	0.00320296	Enriched GUL-1-GFP	Enriched GUL-1-GFP
NCU02598	Q7SG22	hypothetical protein	-0.227551	0.801074	0.947297	8.22987	0.000335296	0.00484322	-0.0562454	0.943454	1	8.19983	8.42426e-07	1.51028e-05	Enriched GUL-1-GFP	Enriched GUL-1-GFP
NCU04914	Q7S3V3	hypothetical protein	-0.22114	0.824485	0.954334	6.11414	0.00971201	0.0394761	0.594358	0.488637	1	0.0424197	0.969302	0.982417	Enriched GUL-1-GFP
NCU07872	Q7SBT7	protein kise Yak1	-0.214647	0.721606	0.917613	6.05334	0.00508574	0.0294905	0.304913	0.563995	1	6.85337	9.59892e-06	0.000118704	Enriched GUL-1-GFP	Enriched GUL-1-GFP
NCU01826	Q1K581	DUF250 domain membrane protein	-0.197391	0.759342	0.93277	7.9875	0.000258091	0.00399403	0.337823	0.555673	1	8.13425	2.22984e-07	4.50523e-06	Enriched GUL-1-GFP	Enriched GUL-1-GFP
NCU06877	V5IKG5	CRAL/TRIO domain-containing protein	-0.1918	0.772776	0.935729	6.41836	0.00337045	0.0235063	0.197612	0.736845	1	2.92458	0.00118628	0.00516063	Enriched GUL-1-GFP	Enriched GUL-1-GFP
NCU07965	Q7S920	dolichol-phosphate mannosyltransferase	-0.176548	0.761433	0.93277	5.66902	1.01676e-08	3.92779e-07	0.11344	0.82181	1	6.13833	4.18634e-20	3.38327e-18	Enriched GUL-1-GFP	Enriched GUL-1-GFP
NCU02681	Q7SH48	translocation protein	-0.163729	0.828242	0.956434	6.47417	0.00359485	0.0241514	0.344917	0.601349	1	2.93439	0.00357112	0.011968	Enriched GUL-1-GFP	Enriched GUL-1-GFP
NCU01879	Q7SHC7	hypothetical protein	-0.160641	0.764044	0.933839	8.49492	6.83065e-05	0.00141966	0.719519	0.129592	1	2.19046	3.88628e-05	0.000372901	Enriched GUL-1-GFP	Enriched GUL-1-GFP
NCU03739	Q92249	protein disulfide-isomerase tigA	-0.159254	0.805507	0.947622	5.60066	0.010352	0.0405186	0.429814	0.449315	1	6.3531	5.15308e-05	0.000465644	Enriched GUL-1-GFP	Enriched GUL-1-GFP
NCU01998	Q7SFN3	septin	-0.15807	0.859106	0.96407	6.79241	0.00313167	0.0228541	-0.829845	0.330635	1	7.19759	1.60512e-05	0.000180592	Enriched GUL-1-GFP	Enriched GUL-1-GFP
NCU05608	Q7S6V7	phosphatidylinositol 3-kise tor2	-0.144689	0.81232	0.950444	2.52491	0.0129483	0.0448083	0.468734	0.412168	1	1.49408	0.0291295	0.0593133	Enriched GUL-1-GFP
NCU02701	Q7SH28	dipeptidyl peptidase	-0.143692	0.84839	0.959559	5.66311	0.0113334	0.0420566	0.254998	0.701036	1	2.26937	0.0402171	0.0763366	Enriched GUL-1-GFP
NCU02812	Q7SEK2	uridylate kise	-0.12931	0.848759	0.959559	5.55584	0.0109443	0.0414011	0.0131505	0.983055	1	5.86255	0.000187005	0.00124917	Enriched GUL-1-GFP	Enriched GUL-1-GFP
NCU03775	Q1K7A5	hypothetical protein	-0.127972	0.947733	0.991064	19.6928	8.94137e-09	3.54966e-07	-2.29996	0.237071	1	26.0829	1.60873e-23	1.67834e-21	Enriched GUL-1-GFP	Enriched GUL-1-GFP
NCU11102	A7UX48	SCJ1	-0.117378	0.871249	0.96943	5.51669	0.0128941	0.044708	-0.201626	0.752815	1	5.72053	0.000349385	0.00201282	Enriched GUL-1-GFP	Enriched GUL-1-GFP
NCU09887	Q7S227	Drp1p	-0.11655	0.895347	0.979274	6.45783	0.00472248	0.0279728	0.179375	0.812827	1	6.28916	0.000148495	0.00106508	Enriched GUL-1-GFP	Enriched GUL-1-GFP
NCU01599	F5HHR7	hypothetical protein	-0.114864	0.885522	0.973474	6.22528	0.00563309	0.0310499	0.416643	0.545287	1	1.88097	0.0422812	0.079362	Enriched GUL-1-GFP
NCU02634	V5IQH3	hypothetical protein, variant	-0.100218	0.89734	0.979274	5.47916	0.0150199	0.0481342	-0.727093	0.309404	1	0.459675	0.58851	0.666444	Enriched GUL-1-GFP
NCU03648	Q1K7P3	glutamise A	-0.0874073	0.96326	0.992729	17.9996	5.85567e-08	2.03137e-06	-0.273476	0.882605	1	18.0807	1.01782e-12	4.45822e-11	Enriched GUL-1-GFP	Enriched GUL-1-GFP
NCU02393	V5IKE7	mitogen-activated protein kise 2	-0.082115	0.90969	0.984959	6.94154	0.00189576	0.016433	-0.299069	0.64655	1	1.98602	0.0151295	0.0365374	Enriched GUL-1-GFP	Enriched GUL-1-GFP
NCU00929	Q7SFB8	hypothetical protein	-0.0781593	0.908642	0.984343	5.88953	0.00733174	0.0348689	0.193419	0.743375	1	0.97954	0.17565	0.24879	Enriched GUL-1-GFP
NCU06285	Q7SAE5	N-acetylated-alpha-linked acidic dipeptidase 2	-0.0776852	0.91742	0.986782	5.87225	0.00807679	0.0365049	0.0313321	0.962007	1	2.76355	0.00225147	0.00846588	Enriched GUL-1-GFP	Enriched GUL-1-GFP
NCU16634	U9W2Z4	hypothetical protein	-0.0739448	0.93972	0.989995	5.98437	0.00999956	0.0400208	1.32172	0.148226	1	3.31533	0.00357837	0.0119727	Enriched GUL-1-GFP	Enriched GUL-1-GFP
NCU06449	Q3Y3Z0	trk-1	-0.0671219	0.94301	0.990214	5.64272	0.0155334	0.0488979	0.0266394	0.974036	1	3.40051	0.00540867	0.0165138	Enriched GUL-1-GFP	Enriched GUL-1-GFP
NCU07771	Q1K690	hypothetical protein	-0.0666575	0.909792	0.984959	4.76817	1.07447e-07	3.60252e-06	-0.108667	0.837638	1	4.57513	1.82335e-12	7.80776e-11	Enriched GUL-1-GFP	Enriched GUL-1-GFP
NCU05789	Q7S5Q4	secreted glucosidase	-0.0651515	0.92445	0.987958	7.1986	2.59055e-14	2.42284e-12	0.210085	0.742799	1	7.9564	4.63137e-26	5.77713e-24	Enriched GUL-1-GFP	Enriched GUL-1-GFP
NCU03168	Q7SEW4	aspartic-type endopeptidase	-0.0624017	0.927358	0.989159	5.42225	0.0124315	0.0440512	0.961132	0.0905989	1	1.85987	0.0198438	0.0447753	Enriched GUL-1-GFP	Enriched GUL-1-GFP
NCU06987	Q7SAG3	hypothetical protein	-0.0549729	0.939359	0.989995	2.63059	0.00967698	0.0394761	0.294596	0.640728	1	8.22059	2.86308e-07	5.62616e-06	Enriched GUL-1-GFP	Enriched GUL-1-GFP
NCU10397	A7UWS6	phosphatidylinositol 4-kise PIK1a	-0.05242	0.956724	0.992707	19.3651	3.99062e-16	8.34275e-14	0.0845731	0.923453	1	1.92094	0.112602	0.172664	Enriched GUL-1-GFP
NCU06649	Q7S7I2	hypothetical protein	-0.0439883	0.953975	0.992247	5.75086	0.0101758	0.040278	0.241684	0.733618	1	5.52193	0.000640358	0.00325525	Enriched GUL-1-GFP	Enriched GUL-1-GFP
NCU02400	Q7S4N5	metacaspase-1B	-0.0330262	0.968314	0.993239	5.5786	0.0145301	0.0471598	0.119107	0.870896	1	2.466	0.0229245	0.0497882	Enriched GUL-1-GFP	Enriched GUL-1-GFP
NCU04670	V5ILW7	hypothetical protein	-0.0324075	0.958938	0.992707	5.38903	0.0131074	0.0450521	-0.197589	0.712868	1	0.111331	0.865905	0.901899	Enriched GUL-1-GFP
NCU09573	V5IKC5	hypothetical protein, variant	-0.0242524	0.977993	0.994465	6.40109	0.00503425	0.0294757	0.18485	0.808898	1	6.94651	2.6701e-05	0.000273723	Enriched GUL-1-GFP	Enriched GUL-1-GFP
NCU00654	Q7SHZ8	hypothetical protein	-0.0238795	0.975788	0.994153	6.13383	0.00509487	0.0294905	0.522695	0.395592	1	1.85164	0.01405	0.0344967	Enriched GUL-1-GFP	Enriched GUL-1-GFP
NCU06541	Q7S9I5	alpha-1,2 mannosyltransferase KTR1	-0.0196141	0.984315	0.99666	21.5138	4.56668e-19	2.31857e-16	0.168217	0.853687	1	4.23617	0.000439264	0.00242123	Enriched GUL-1-GFP	Enriched GUL-1-GFP
NCU04203	Q1K7D3	glucosidase II alpha subunit	-0.0179039	0.976667	0.994174	6.43044	0.00316378	0.0229941	0.192978	0.726603	1	1.2631	0.0758975	0.126232	Enriched GUL-1-GFP
NCU06602	Q7S9R3	hypothetical protein	-0.016328	0.980321	0.995965	5.49697	0.0118293	0.0431195	0.131319	0.818165	1	2.19829	0.0137053	0.0338784	Enriched GUL-1-GFP	Enriched GUL-1-GFP
NCU03554	Q7RWQ3	hypothetical protein	-0.00515163	0.993129	0.998089	2.96408	0.00274833	0.0208708	0.28023	0.589644	1	7.80117	4.01287e-07	7.779e-06	Enriched GUL-1-GFP	Enriched GUL-1-GFP
NCU04111	Q1K7N5	phosphoesterase	-0.00264072	0.996944	0.99919	5.58822	0.0106216	0.0408386	0.0374211	0.948116	1	5.5126	0.000459028	0.00250133	Enriched GUL-1-GFP	Enriched GUL-1-GFP
NCU00528	Q7SDL6	FHA domain-containing protein	-0.0021761	0.997659	0.99942	5.35349	0.0159368	0.0494228	0.629397	0.339362	1	5.06241	0.00159671	0.00643392	Enriched GUL-1-GFP	Enriched GUL-1-GFP
NCU08948	V5IMU7	NIF domain-containing protein, variant	-0.00156846	0.998623	0.99942	5.91738	0.0113492	0.0420566	0.386457	0.63701	1	1.79447	0.121062	0.182996	Enriched GUL-1-GFP
NCU04120	P61859	calmodulin A	0.00440231	0.99483	0.998445	6.68502	0.00241015	0.0189506	-0.0419368	0.944441	1	-0.00123418	0.998577	1	Enriched GUL-1-GFP
NCU01658	V5INC4	WD repeat protein	0.0103542	0.988192	0.996798	6.35616	0.00417127	0.0261013	-0.300205	0.635416	1	1.63127	0.0428044	0.0801391	Enriched GUL-1-GFP
NCU06847	Q1K8K6	major facilitator superfamily transporter	0.0108524	0.986802	0.996798	6.90353	0.0016513	0.0149331	-0.100986	0.861564	1	2.9063	0.000270421	0.00166602	Enriched GUL-1-GFP	Enriched GUL-1-GFP
NCU05990	V5IKT5	cell surface receptor/MFS transporter, variant 2	0.0116616	0.990151	0.996798	7.4343	0.00130716	0.0127663	0.545037	0.505064	1	7.33503	1.27443e-05	0.000147433	Enriched GUL-1-GFP	Enriched GUL-1-GFP
NCU02524	Q7SHT9	rho GAP domain-containing protein	0.0131946	0.988284	0.996798	5.67509	0.0136375	0.0458908	-0.466131	0.559322	1	5.82519	0.000489593	0.00264279	Enriched GUL-1-GFP	Enriched GUL-1-GFP
NCU01456	V5IMN8	DUF250 domain membrane protein	0.0139769	0.980839	0.995965	7.83306	0.000245254	0.00389121	0.282701	0.553409	1	4.09017	3.30005e-06	4.79384e-05	Enriched GUL-1-GFP	Enriched GUL-1-GFP
NCU05644	Q7S616	GPI transamidase component GPI16	0.0238198	0.975779	0.994153	5.93335	0.0081042	0.0365049	0.898055	0.196603	1	3.08705	0.00266057	0.00957739	Enriched GUL-1-GFP	Enriched GUL-1-GFP
NCU01919	Q7SH87	ubiquitin C-termil hydrolase	0.0257859	0.968409	0.993239	5.47078	0.0123101	0.0439699	-0.598512	0.303789	1	-1.03963	0.134055	0.198762	Enriched GUL-1-GFP
NCU08977	Q7S2Z2	long chain fatty alcohol oxidase	0.026942	0.967848	0.993239	5.53055	0.012203	0.0437861	0.0255803	0.96734	1	0.236544	0.774966	0.828073	Enriched GUL-1-GFP
NCU06834	Q7SCH0	ADAM protease ADM-B	0.0286757	0.963664	0.992729	7.50171	0.000558549	0.00719234	0.381411	0.482501	1	8.31053	9.93419e-08	2.2094e-06	Enriched GUL-1-GFP	Enriched GUL-1-GFP
NCU05373	Q7SBZ2	hypothetical protein	0.0289923	0.975592	0.994153	6.65482	0.00428769	0.0265382	0.290817	0.72369	1	6.76701	6.5741e-05	0.00056555	Enriched GUL-1-GFP	Enriched GUL-1-GFP
NCU07187	V5ILS4	hypothetical protein, variant 2	0.0311868	0.96518	0.992737	6.12654	0.0057875	0.0314507	-0.151499	0.811241	1	0.763012	0.336598	0.423139	Enriched GUL-1-GFP
NCU01362	Q1K6N4	INO80 chromatin remodeling complex	0.0403777	0.959861	0.992707	5.82073	0.00997347	0.0399981	1.42858	0.048314	1	0.246383	0.772204	0.8262	Enriched GUL-1-GFP
NCU04246	V5ILP1	hypothetical protein	0.0419838	0.964766	0.992737	5.75163	0.0139675	0.0462359	-0.375991	0.653377	1	1.32932	0.182597	0.256109	Enriched GUL-1-GFP
NCU04254	Q7S7T0	hypothetical protein	0.0455356	0.94426	0.990619	7.25666	0.00087969	0.00982754	0.116549	0.842349	1	1.85896	0.0063257	0.0187387	Enriched GUL-1-GFP	Enriched GUL-1-GFP
NCU01305	Q1K7W1	rhomboid family membrane protein	0.0464313	0.958096	0.992707	20.4668	1.44691e-18	6.4279e-16	0.402912	0.612459	1	28.4445	2.35395e-63	1.3507e-59	Enriched GUL-1-GFP	Enriched GUL-1-GFP
NCU00949	Q7SGH3	hypothetical protein	0.051542	0.945521	0.990619	5.51917	0.0136242	0.0458908	0.815297	0.233252	1	5.13672	0.00149729	0.00615988	Enriched GUL-1-GFP	Enriched GUL-1-GFP
NCU05066	Q7RXB8	hypothetical protein	0.0556059	0.94591	0.990619	5.52083	0.0142059	0.0466336	0.711591	0.313019	1	5.30429	0.00113417	0.00500605	Enriched GUL-1-GFP	Enriched GUL-1-GFP
NCU03305	Q1K909	calcium-transporting ATPase sarcoplasmic/endoplasmic reticulum type	0.0558979	0.953449	0.99223	17.7302	9.91631e-14	8.19594e-12	0.0914921	0.917181	1	2.24749	0.0639004	0.109779	Enriched GUL-1-GFP
NCU00880	Q7SFF1	phospholipase A-2-activating protein	0.056473	0.937118	0.989995	5.41997	0.0142105	0.0466336	0.621576	0.343353	1	-0.203739	0.77859	0.831327	Enriched GUL-1-GFP
NCU06005	Q7S2F2	glycerol kise	0.0567334	0.965252	0.992737	18.0869	1.10211e-11	6.87173e-10	0.00379143	0.99752	1	21.0578	2.2923e-26	2.98936e-24	Enriched GUL-1-GFP	Enriched GUL-1-GFP
NCU01044	Q1K8C2	spray	0.059677	0.949017	0.991136	6.17716	0.0074505	0.0348868	0.728627	0.400918	1	3.06703	0.00312989	0.0108515	Enriched GUL-1-GFP	Enriched GUL-1-GFP
NCU01523	F5H8U4	GTP-binding protein ypt3	0.0646551	0.923933	0.987958	6.44808	0.00329797	0.0235063	-0.320961	0.581603	1	2.03648	0.0195989	0.0443196	Enriched GUL-1-GFP	Enriched GUL-1-GFP
NCU02875	Q7SHM9	hypothetical protein	0.0691798	0.937196	0.989995	6.92879	0.00259928	0.0200822	0.31308	0.686815	1	6.42381	0.00012086	0.000908907	Enriched GUL-1-GFP	Enriched GUL-1-GFP
NCU08397	Q7SC23	hypothetical protein	0.070233	0.933917	0.989995	7.55269	0.00105008	0.0109084	0.116698	0.880409	1	1.22938	0.169665	0.241933	Enriched GUL-1-GFP
NCU08455	Q7SC55	hypothetical protein	0.0721045	0.972848	0.994153	15.7238	9.7982e-06	0.000235289	-1.05839	0.607069	1	16.7745	9.01143e-10	2.97246e-08	Enriched GUL-1-GFP	Enriched GUL-1-GFP
NCU10497	A7UW38	oligosaccharyl transferase STT3 subunit	0.0730461	0.940322	0.989995	16.6656	3.21693e-12	2.07872e-10	0.0746972	0.933051	1	24.9929	2.46979e-46	1.09013e-43	Enriched GUL-1-GFP	Enriched GUL-1-GFP
NCU01267	Q7S7C5	palmitoyltransferase PFA3	0.0730948	0.939186	0.989995	6.60476	0.00425531	0.0264395	-0.379262	0.650865	1	6.56901	9.13189e-05	0.000732476	Enriched GUL-1-GFP	Enriched GUL-1-GFP
NCU03222	V5IR11	hypothetical protein, variant	0.0741789	0.884357	0.973474	2.36699	0.000959814	0.0103369	-0.302261	0.496777	1	2.93262	1.21754e-07	2.68702e-06	Enriched GUL-1-GFP	Enriched GUL-1-GFP
NCU02690	Q7SH39	mitochondrial integral membrane protein	0.0782615	0.951148	0.991799	17.0459	9.59041e-11	5.24374e-09	-0.3239	0.78407	1	20.6719	4.14574e-26	5.28628e-24	Enriched GUL-1-GFP	Enriched GUL-1-GFP
NCU04245	P23231	outer mitochondrial membrane translocase	0.0801124	0.910792	0.985096	5.54523	0.0118919	0.0431579	1.46081	0.0278386	1	5.84256	0.000233024	0.00149229	Enriched GUL-1-GFP	Enriched GUL-1-GFP
NCU04160	Q1K7K2	hypothetical protein	0.0859118	0.893917	0.978883	4.59689	3.51878e-06	9.6198e-05	0.240028	0.663824	1	5.09803	2.2883e-12	9.63684e-11	Enriched GUL-1-GFP	Enriched GUL-1-GFP
NCU07769	Q7S105	hypothetical protein	0.0866987	0.851293	0.960789	4.11264	1.59728e-12	1.11309e-10	-0.171627	0.667461	1	5.85107	3.40106e-37	6.96975e-35	Enriched GUL-1-GFP	Enriched GUL-1-GFP
NCU06511	U9W2U0	hypothetical protein, variant	0.0881825	0.923915	0.987958	5.83396	0.0119167	0.0431579	1.1666	0.158747	1	6.06748	0.000322883	0.00189051	Enriched GUL-1-GFP	Enriched GUL-1-GFP
NCU04360	Q7RW60	hypothetical protein	0.0918527	0.875639	0.971261	3.24323	2.42519e-05	0.000556092	0.204432	0.69165	1	3.78721	1.04726e-10	3.66415e-09	Enriched GUL-1-GFP	Enriched GUL-1-GFP
NCU04355	Q7RW65	phosphatidylinositol 4-kise type II subunit alpha	0.0950381	0.86881	0.967736	6.24992	0.00358824	0.0241514	0.721109	0.159031	1	0.839476	0.160071	0.229967	Enriched GUL-1-GFP
NCU00124	U9W4U5	hypothetical protein	0.0952881	0.864079	0.965776	2.67524	0.00693421	0.0340281	0.467992	0.353623	1	2.38628	0.000263243	0.0016365	Enriched GUL-1-GFP	Enriched GUL-1-GFP
NCU03965	V5IL09	catabolite repression protein creC, variant	0.105548	0.920874	0.986967	5.99541	0.0136609	0.0458908	0.088647	0.925458	1	5.65056	0.00153176	0.0062468	Enriched GUL-1-GFP	Enriched GUL-1-GFP
NCU00968	V5IR97	SIL1, variant 1	0.108805	0.909996	0.984959	5.6711	0.0154711	0.048847	0.554658	0.521364	1	2.4061	0.0386849	0.0738437	Enriched GUL-1-GFP
NCU07542	Q7S306	rad23-like protein	0.109433	0.881003	0.972486	5.7235	0.0100255	0.0400794	0.00615726	0.992445	1	1.23358	0.140011	0.205838	Enriched GUL-1-GFP
NCU03108	Q7SFY6	glutamate carboxypeptidase	0.111276	0.899702	0.979428	18.7581	8.44002e-16	1.49979e-13	-0.186677	0.816517	1	1.80471	0.075013	0.124978	Enriched GUL-1-GFP
NCU01720	Q1K4T9	hypothetical protein	0.114965	0.848996	0.959559	5.4059	1.64913e-11	9.76837e-10	0.362244	0.507592	1	6.34012	3.73553e-22	3.34913e-20	Enriched GUL-1-GFP	Enriched GUL-1-GFP
NCU06744	Q1K8U0	hypothetical protein	0.116308	0.882473	0.972876	6.16329	0.00604389	0.0321076	0.339485	0.622438	1	2.01852	0.0330883	0.0656957	Enriched GUL-1-GFP
NCU02175	Q7SE08	phosphatidyl inositol-specific phospholipase C	0.130729	0.867044	0.966802	6.11801	0.00733876	0.0348689	-0.252634	0.726538	1	-0.0977877	0.909326	0.936585	Enriched GUL-1-GFP
NCU08002	Q7SAN8	carnitine acetyl transferase	0.131235	0.846259	0.959559	5.75038	0.00873101	0.0377035	0.986885	0.116834	1	6.40542	4.84698e-05	0.000445009	Enriched GUL-1-GFP	Enriched GUL-1-GFP
NCU02422	Q7S4D7	ATG9 protein	0.13656	0.878814	0.972352	5.62978	0.0154814	0.048847	0.179735	0.821641	1	5.88905	0.000500187	0.00268985	Enriched GUL-1-GFP	Enriched GUL-1-GFP
NCU03319	Q7SEM5	COPII-coated vesicle protein SurF4/Erv29	0.137719	0.885898	0.973474	17.8284	6.33837e-14	5.49429e-12	-0.051559	0.95281	1	-0.0886667	0.931519	0.954133	Enriched GUL-1-GFP
NCU16399	V5IR56	hypothetical protein	0.14308	0.847989	0.959559	5.57349	0.0123321	0.0440044	0.180961	0.781069	1	-0.435167	0.586405	0.664848	Enriched GUL-1-GFP
NCU00899	Q7SCV5	hypothetical protein	0.144168	0.819856	0.951343	3.14629	0.000194607	0.00332516	0.0772922	0.89354	1	5.42873	6.27284e-15	3.30216e-13	Enriched GUL-1-GFP	Enriched GUL-1-GFP
NCU00196	U9W393	rho GTPase activator	0.145111	0.828449	0.956434	5.99178	0.00613357	0.0322281	0.348877	0.552411	1	3.07622	0.000584072	0.0030495	Enriched GUL-1-GFP	Enriched GUL-1-GFP
NCU07521	Q7S199	F-box/WD-40 domain-containing protein 2	0.147241	0.842448	0.959559	6.83733	0.00195152	0.0167125	0.662188	0.303594	1	3.93775	2.56031e-06	3.86607e-05	Enriched GUL-1-GFP	Enriched GUL-1-GFP
NCU00067	Q7RX83	dolichyl-phosphate mannosyltransferase polypeptide 2	0.147944	0.898612	0.979274	6.86813	0.00610064	0.0321818	0.289719	0.780902	1	7.21399	9.16299e-05	0.000733295	Enriched GUL-1-GFP	Enriched GUL-1-GFP
NCU01213	Q9Y783	superoxide dismutase	0.151675	0.801821	0.947512	6.80569	0.00170825	0.0153311	0.122215	0.819969	1	1.68807	0.0172987	0.040366	Enriched GUL-1-GFP	Enriched GUL-1-GFP
NCU02586	Q7SHN2	ENTH domain-containing protein	0.152302	0.86229	0.965113	6.66653	0.0037711	0.0248194	0.328846	0.669477	1	3.81042	0.000598128	0.00309195	Enriched GUL-1-GFP	Enriched GUL-1-GFP
NCU09192	Q1K6E7	CDP-diacylglycerol-inositol 3-phosphatidyltransferase PIS	0.154319	0.8687	0.967736	6.01499	0.0106193	0.0408386	-0.491571	0.556046	1	2.25828	0.0550408	0.0972963	Enriched GUL-1-GFP
NCU05897	Q7S511	l-fucose permease	0.156015	0.897265	0.979274	18.1735	1.84745e-12	1.23884e-10	0.459273	0.681329	1	19.8234	4.76815e-25	5.26147e-23	Enriched GUL-1-GFP	Enriched GUL-1-GFP
NCU02904	Q7SHK0	alpha/beta hydrolase fold protein	0.159976	0.825329	0.954788	3.53094	0.00923643	0.0388018	0.513442	0.440076	1	3.59411	9.20657e-05	0.000735757	Enriched GUL-1-GFP	Enriched GUL-1-GFP
NCU01862	Q7SHE4	SWIRM domain-containing protein FUN19	0.160713	0.818667	0.951292	2.76739	0.00743222	0.0348868	0.616791	0.293935	1	3.0529	0.000280733	0.00170906	Enriched GUL-1-GFP	Enriched GUL-1-GFP
NCU07895	Q7S881	hypothetical protein	0.164244	0.832096	0.95675	2.69685	0.0128747	0.0446841	0.441661	0.480277	1	1.15512	0.144868	0.211585	Enriched GUL-1-GFP
NCU03055	Q7SCI8	alpha-1,6-mannosyltransferase subunit	0.165283	0.847533	0.959559	5.5694	0.0152625	0.0486049	0.414485	0.583667	1	6.27312	0.000165535	0.00114163	Enriched GUL-1-GFP	Enriched GUL-1-GFP
NCU02411	Q7S473	hypothetical protein	0.167805	0.823526	0.953746	5.62437	0.0119351	0.0431579	0.25676	0.704362	1	5.13094	0.00151754	0.00620725	Enriched GUL-1-GFP	Enriched GUL-1-GFP
NCU06305	Q7SAC5	tartrate transporter	0.171761	0.834527	0.957207	7.28674	0.00153501	0.0141998	-0.196002	0.794356	1	6.53947	9.04824e-05	0.000728174	Enriched GUL-1-GFP	Enriched GUL-1-GFP
NCU06209	Q7SBB4	hypothetical protein	0.174813	0.737642	0.922817	6.59463	1.29772e-10	6.88375e-09	0.236472	0.593674	1	4.35017	1.29913e-16	7.93025e-15	Enriched GUL-1-GFP	Enriched GUL-1-GFP
NCU00431	Q07335	mitochondrial import receptor subunit Tom22	0.17791	0.808056	0.948198	5.53119	0.0124082	0.0440512	0.285357	0.658624	1	5.30136	0.000892209	0.00417237	Enriched GUL-1-GFP	Enriched GUL-1-GFP
NCU05720	Q7SB92	chitin synthase export chaperone	0.178833	0.803692	0.947622	7.80792	0.000422951	0.00582623	0.0653775	0.916566	1	8.21504	2.62554e-07	5.21292e-06	Enriched GUL-1-GFP	Enriched GUL-1-GFP
NCU04622	Q1K641	hypothetical protein	0.18218	0.802224	0.947512	5.56562	0.0119243	0.0431579	-0.485569	0.450251	1	5.0324	0.00163451	0.00654032	Enriched GUL-1-GFP	Enriched GUL-1-GFP
NCU01918	Q7SH88	ARP2/3 complex 20 kDa subunit	0.182304	0.812061	0.950444	5.46481	0.0148342	0.0477258	-0.625716	0.351926	1	5.44803	0.000780939	0.00380393	Enriched GUL-1-GFP	Enriched GUL-1-GFP
NCU03293	Q7SDW3	hypothetical protein	0.190995	0.732689	0.920602	4.1521	8.55932e-09	3.4568e-07	-0.0196151	0.969308	1	5.7801	1.69648e-23	1.73829e-21	Enriched GUL-1-GFP	Enriched GUL-1-GFP
NCU07705	V5INA3	C6 finger domain-containing protein	0.192807	0.827571	0.956073	5.59423	0.0152995	0.0486354	-0.2502	0.751505	1	5.49459	0.00104892	0.00472424	Enriched GUL-1-GFP	Enriched GUL-1-GFP
NCU06233	Q7SBS3	hypothetical protein	0.194613	0.767737	0.935729	5.7525	0.00833327	0.0368182	-0.0760114	0.894947	1	2.82093	0.0063773	0.0188429	Enriched GUL-1-GFP	Enriched GUL-1-GFP
NCU06702	Q871R7	yop-1	0.198113	0.776635	0.93666	9.85983	8.95682e-06	0.000218031	-0.206811	0.740613	1	4.23548	2.55456e-08	6.66277e-07	Enriched GUL-1-GFP	Enriched GUL-1-GFP
NCU01146	Q1K756	sigl sequence receptor alpha chain	0.198214	0.783167	0.938583	5.70566	0.00978442	0.0396052	0.169515	0.783205	1	6.00264	0.000161326	0.00112571	Enriched GUL-1-GFP	Enriched GUL-1-GFP
NCU05939	Q7S2D9	cell division control protein 4	0.201533	0.777379	0.936827	6.36621	0.00393914	0.0255936	0.700476	0.264	1	2.02971	0.0122554	0.0310195	Enriched GUL-1-GFP	Enriched GUL-1-GFP
NCU08578	Q7S021	oxysterol binding protein	0.205547	0.756155	0.932179	3.3048	0.00063578	0.00775344	0.547878	0.358896	1	4.09258	4.59282e-08	1.10729e-06	Enriched GUL-1-GFP	Enriched GUL-1-GFP
NCU00911	Q7SCT2	polysaccharide synthase Cps1p	0.208167	0.766511	0.935126	4.80544	1.27896e-06	3.69547e-05	0.139469	0.833791	1	7.49184	1.84226e-11	7.19109e-10	Enriched GUL-1-GFP	Enriched GUL-1-GFP
NCU01996	Q7SFN5	pH-response regulator protein palI/rim-9	0.209715	0.805609	0.947622	3.58742	0.00757654	0.0352465	0.213454	0.778735	1	7.91599	2.02642e-06	3.18565e-05	Enriched GUL-1-GFP	Enriched GUL-1-GFP
NCU07387	Q7S2H5	hypothetical protein	0.20979	0.812578	0.950444	6.90253	0.00287641	0.0216126	-0.060285	0.938509	1	6.41435	0.000139399	0.00100994	Enriched GUL-1-GFP	Enriched GUL-1-GFP
NCU02749	Q7SGA1	hypothetical protein	0.214976	0.785311	0.93904	5.55116	0.0127322	0.044494	0.117207	0.858517	1	5.65327	0.000440758	0.0024248	Enriched GUL-1-GFP	Enriched GUL-1-GFP
NCU02036	Q1K916	tR-splicing endonuclease	0.217979	0.818193	0.951292	5.75308	0.0141344	0.0465557	0.971159	0.27082	1	1.93501	0.0646688	0.110866	Enriched GUL-1-GFP
NCU09615	Q7RV27	hypothetical protein	0.220832	0.76535	0.934788	6.32913	0.00464011	0.0276694	0.388622	0.552415	1	1.86897	0.0351677	0.0687068	Enriched GUL-1-GFP
NCU07514	U9W3R7	hypothetical protein, variant	0.22387	0.798035	0.945866	5.80813	0.0113408	0.0420566	-0.0172318	0.982753	1	6.39214	0.000122457	0.000918504	Enriched GUL-1-GFP	Enriched GUL-1-GFP
NCU01560	Q1K4X9	hypothetical protein	0.227303	0.647319	0.885011	3.23098	0.000222827	0.0036327	0.00352954	0.993403	1	3.04222	1.41529e-07	3.03019e-06	Enriched GUL-1-GFP	Enriched GUL-1-GFP
NCU04834	Q45KI1	sensor histidine kise/response regulator	0.228699	0.755821	0.932039	6.65977	0.00237204	0.0188085	0.436188	0.481103	1	3.26102	5.78129e-05	0.00051193	Enriched GUL-1-GFP	Enriched GUL-1-GFP
NCU05974	Q7S222	cell wall glucanosyltransferase Mwg1	0.239215	0.632149	0.878726	3.26288	2.29994e-07	7.56851e-06	-0.207282	0.640788	1	5.27849	1.63216e-25	1.83634e-23	Enriched GUL-1-GFP	Enriched GUL-1-GFP
NCU01193	Q1K844	hypothetical protein	0.239817	0.721265	0.917613	6.99786	0.00150043	0.01407	0.351998	0.551965	1	1.57409	0.0254354	0.0536971	Enriched GUL-1-GFP
NCU00083	Q7RX67	hypothetical protein	0.240467	0.769243	0.935729	5.67045	0.0119478	0.0431579	0.649602	0.373379	1	1.67931	0.0555056	0.0979973	Enriched GUL-1-GFP
NCU00673	Q7SHY0	serine protease p2	0.242103	0.695331	0.90498	2.47226	0.00411018	0.0260849	-0.326033	0.581411	1	2.6517	8.55527e-05	0.000694885	Enriched GUL-1-GFP	Enriched GUL-1-GFP
NCU04633	Q1K6H9	RING finger protein	0.247795	0.71907	0.917232	6.47604	0.0033545	0.0235063	0.0840535	0.889792	1	2.16544	0.00594971	0.017846	Enriched GUL-1-GFP	Enriched GUL-1-GFP
NCU04007	Q7RZJ5	hypothetical protein	0.249517	0.689608	0.902948	5.67027	0.00896848	0.0381855	0.499371	0.376666	1	0.877847	0.215828	0.294084	Enriched GUL-1-GFP
NCU02558	Q7SHQ7	MADS-box MEF2 type transcription factor	0.250087	0.81874	0.951292	18.9592	1.89688e-14	1.87264e-12	-0.131285	0.894795	1	0.779952	0.520144	0.604289	Enriched GUL-1-GFP
NCU00405	Q7RYQ5	glycyl-tR synthetase 1	0.251372	0.829939	0.956434	7.33742	0.00400386	0.0258253	1.3939	0.232459	1	1.24169	0.312984	0.398469	Enriched GUL-1-GFP
NCU15832	U9W8S9	hypothetical protein	0.251984	0.724592	0.917903	5.79374	0.00906888	0.03837	0.294209	0.64482	1	2.47292	0.0136651	0.0338122	Enriched GUL-1-GFP	Enriched GUL-1-GFP
NCU03611	P29070	chitin synthase	0.252372	0.727265	0.918734	7.3172	0.00105278	0.0109084	0.727934	0.264355	1	2.8678	0.000399297	0.00225231	Enriched GUL-1-GFP	Enriched GUL-1-GFP
NCU06055	Q7S4Z5	extracellular alkaline protease	0.258552	0.791467	0.942977	7.02139	0.0026476	0.020367	-0.287201	0.72526	1	8.27798	1.1147e-06	1.91501e-05	Enriched GUL-1-GFP	Enriched GUL-1-GFP
NCU02227	Q7S4G6	acetylornithine deacetylase	0.259166	0.688292	0.902209	5.7505	0.00824525	0.0367844	-0.245366	0.656717	1	1.56328	0.0775797	0.128249	Enriched GUL-1-GFP
NCU10011	Q7S0J5	hypothetical protein	0.259204	0.799327	0.946673	5.82754	0.0156519	0.0490104	0.475623	0.604039	1	5.51261	0.00180312	0.00709732	Enriched GUL-1-GFP	Enriched GUL-1-GFP
NCU03379	V5IQW9	hypothetical protein, variant	0.259915	0.685374	0.901794	2.26091	0.0114843	0.0423835	1.34914	0.0233975	1	3.74901	1.56653e-07	3.31687e-06	Enriched GUL-1-GFP	Enriched GUL-1-GFP
NCU06107	Q7S5I0	hypothetical protein	0.263435	0.78091	0.937888	5.68872	0.0157031	0.0490842	-0.20238	0.81131	1	4.61618	0.00732275	0.0210405	Enriched GUL-1-GFP	Enriched GUL-1-GFP
NCU01180	Q1K856	ubiquitin C-termil hydrolase	0.264672	0.734531	0.921536	5.80351	0.00997549	0.0399981	0.110444	0.872601	1	1.63065	0.0562745	0.0989589	Enriched GUL-1-GFP
NCU07075	V5ILA0	calcium/proton exchanger, variant	0.265392	0.796636	0.945389	18.7445	1.18659e-14	1.24034e-12	0.232479	0.804488	1	28.0868	4.39317e-56	6.302e-53	Enriched GUL-1-GFP	Enriched GUL-1-GFP
NCU06715	Q1K6X6	hypothetical protein	0.26602	0.718193	0.916667	6.11274	0.00602384	0.0320853	0.986308	0.15261	1	0.823119	0.270624	0.354223	Enriched GUL-1-GFP
NCU00089	U9WGN3	MYND domain-containing protein, variant 2	0.267029	0.783205	0.938583	5.8214	0.012636	0.0443943	0.752647	0.387623	1	3.16438	0.00411401	0.0134355	Enriched GUL-1-GFP	Enriched GUL-1-GFP
NCU08171	Q7S4H9	anchored cell wall protein 12	0.28386	0.780839	0.937888	17.7472	2.5289e-13	1.95385e-11	0.056746	0.951397	1	25.2088	1.17379e-45	4.49014e-43	Enriched GUL-1-GFP	Enriched GUL-1-GFP
NCU08976	Q7S2Z3	fatty acid elongase	0.284858	0.722806	0.917613	6.89236	0.00245118	0.0192307	0.453276	0.545928	1	7.50232	5.29507e-06	7.29742e-05	Enriched GUL-1-GFP	Enriched GUL-1-GFP
NCU03292	Q1K905	calcium-transporting ATPase type 2C member 1	0.284879	0.68318	0.900931	5.32071	0.015614	0.0489742	0.285004	0.637453	1	5.98658	0.000156388	0.00110108	Enriched GUL-1-GFP	Enriched GUL-1-GFP
NCU06881	Q7S3H2	succinyl-CoA:3-ketoacid-coenzyme A transferase subunit A	0.285011	0.652745	0.887498	5.57309	0.0100368	0.0400794	0.00885867	0.987356	1	1.62177	0.0492398	0.0890725	Enriched GUL-1-GFP
NCU02951	Q7SHF3	40S ribosomal protein S8	0.285318	0.761377	0.93277	6.44439	0.00532587	0.0301143	-0.284899	0.723251	1	2.25769	0.0270603	0.0561504	Enriched GUL-1-GFP
NCU01728	V5INJ7	6-phosphofructo-2-kise, variant	0.286595	0.619327	0.872965	2.48374	0.00654071	0.0331135	0.624391	0.2206	1	0.847478	0.151224	0.218845	Enriched GUL-1-GFP
NCU04605	Q1K6B5	hypothetical protein	0.287021	0.863833	0.965776	17.9126	3.80209e-09	1.62803e-07	-0.395257	0.804418	1	19.7223	9.02644e-18	6.09338e-16	Enriched GUL-1-GFP	Enriched GUL-1-GFP
NCU02635	Q7SDH5	mann polymerase complexes MNN9 subunit	0.287346	0.7793	0.937598	5.97277	0.0134286	0.0456264	0.111195	0.903999	1	6.1928	0.000464976	0.00253134	Enriched GUL-1-GFP	Enriched GUL-1-GFP
NCU04242	Q9HEH1	ATP-dependent helicase M7	0.288625	0.676447	0.896695	10.6637	1.3187e-06	3.77957e-05	0.220252	0.724362	1	6.48498	4.38232e-17	2.79397e-15	Enriched GUL-1-GFP	Enriched GUL-1-GFP
NCU09121	Q7S2M7	vacuolar sorting protein	0.289895	0.671945	0.895643	6.01005	0.00638975	0.0328175	-0.191441	0.747472	1	0.339154	0.638843	0.712475	Enriched GUL-1-GFP
NCU01824	Q1K582	UDP-galactopyranose mutase	0.293924	0.637974	0.882188	7.24786	0.000889379	0.0098469	0.645564	0.291167	1	1.65846	0.0162696	0.0385445	Enriched GUL-1-GFP	Enriched GUL-1-GFP
NCU05032	V5INI1	60S ribosomal protein L40	0.294202	0.668181	0.894436	5.89092	0.00744932	0.0348868	0.00277892	0.996235	1	6.25134	7.9638e-05	0.000661307	Enriched GUL-1-GFP	Enriched GUL-1-GFP
NCU00827	Q7SEA7	hypothetical protein	0.294488	0.748071	0.928615	5.85906	0.0117379	0.0428961	-0.482102	0.597562	1	0.795906	0.403951	0.491387	Enriched GUL-1-GFP
NCU04510	Q7RY53	aldose reductase	0.294992	0.727519	0.918734	5.87874	0.0109413	0.0414011	0.725122	0.362572	1	3.49145	0.0390297	0.0743782	Enriched GUL-1-GFP
NCU14083	#N/A		0.29594	0.893056	0.978495	17.6694	1.0971e-06	3.19597e-05	-0.135741	0.94894	1	23.9363	6.16577e-18	4.26255e-16	Enriched GUL-1-GFP	Enriched GUL-1-GFP
NCU02504	Q7SG61	DUF1640 domain-containing protein	0.298533	0.694197	0.90434	5.95053	0.00720488	0.0347224	-0.459886	0.474729	1	5.93269	0.000202183	0.00132889	Enriched GUL-1-GFP	Enriched GUL-1-GFP
NCU08621	Q7SFJ8	hypothetical protein	0.299271	0.644641	0.883682	5.81209	0.00793652	0.0361158	-0.462893	0.409771	1	0.49116	0.489949	0.575619	Enriched GUL-1-GFP
NCU00295	Q7RZR9	hypothetical protein	0.301756	0.636694	0.881632	7.15932	0.000997891	0.0105551	0.299253	0.5917	1	3.29298	4.75855e-05	0.000441866	Enriched GUL-1-GFP	Enriched GUL-1-GFP
NCU00600	Q6MUQ7	small Rho-type GTPase	0.305842	0.595629	0.863615	4.7463	5.1893e-08	1.84428e-06	0.0714561	0.888041	1	4.47862	1.3233e-12	5.75234e-11	Enriched GUL-1-GFP	Enriched GUL-1-GFP
NCU09325	Q7SDE7	WD domain-containing protein	0.306327	0.659194	0.890302	5.62265	0.0103985	0.0405401	0.397858	0.496206	1	1.58988	0.046917	0.0857628	Enriched GUL-1-GFP
NCU04526	Q7RY37	hypothetical protein	0.306599	0.486145	0.79445	2.47821	0.000627168	0.00771264	-0.00646118	0.986749	1	1.8124	0.000163362	0.0011341	Enriched GUL-1-GFP	Enriched GUL-1-GFP
NCU08959	Q7S797	hypothetical protein	0.309649	0.705079	0.910377	7.4561	0.000929045	0.0101595	0.00558005	0.993592	1	7.79453	1.67952e-06	2.75346e-05	Enriched GUL-1-GFP	Enriched GUL-1-GFP
NCU08447	Q7SC63	hypothetical protein	0.309856	0.819156	0.951292	7.41034	0.00122447	0.0122585	-0.0928665	0.906423	1	8.36194	4.88512e-07	9.2511e-06	Enriched GUL-1-GFP	Enriched GUL-1-GFP
NCU07363	Q7S0C0	hypothetical protein	0.310705	0.75713	0.932559	18.5079	1.52099e-14	1.54446e-12	0.243819	0.789054	1	26.2919	2.97319e-50	2.13252e-47	Enriched GUL-1-GFP	Enriched GUL-1-GFP
NCU06597	Q7S9R8	hypothetical protein	0.314563	0.832458	0.95675	17.1988	1.27068e-09	6.18628e-08	-0.131149	0.925343	1	16.1224	2.37107e-13	1.09719e-11	Enriched GUL-1-GFP	Enriched GUL-1-GFP
NCU04388	Q7RZ85	phosphatidylglycerol/phosphatidylinositol transfer protein	0.316477	0.691275	0.903686	5.89082	0.00935752	0.039036	0.0201067	0.977327	1	1.76056	0.0996303	0.156387	Enriched GUL-1-GFP
NCU15835	V5IKI3	hypothetical protein, variant 2	0.317507	0.675555	0.896638	6.87185	0.00238149	0.0188085	0.694692	0.326619	1	2.27918	0.00789863	0.0221734	Enriched GUL-1-GFP	Enriched GUL-1-GFP
NCU07994	Q7SAP6	hypothetical protein	0.319958	0.67309	0.896575	4.23376	0.000134038	0.00256992	0.502356	0.443088	1	4.11882	2.52495e-07	5.03061e-06	Enriched GUL-1-GFP	Enriched GUL-1-GFP
NCU00823	Q7SEB1	26S proteasome regulatory subunit RPN11	0.321502	0.650695	0.885903	5.86525	0.00780415	0.0358013	0.627459	0.317525	1	-0.839388	0.250504	0.332426	Enriched GUL-1-GFP
NCU03240	Q7SGT0	hypothetical protein	0.327165	0.617794	0.872797	7.03398	0.00129581	0.012757	-0.0467323	0.933397	1	1.77335	0.00787721	0.0221457	Enriched GUL-1-GFP	Enriched GUL-1-GFP
NCU08806	Q7S8S8	hypothetical protein	0.32774	0.771535	0.935729	17.8311	1.22508e-12	8.70784e-11	-0.0327481	0.974833	1	20.5696	1.70863e-28	2.39125e-26	Enriched GUL-1-GFP	Enriched GUL-1-GFP
NCU10905	A7UWG5	SH3 domain-containing protein	0.329834	0.609307	0.868735	5.85394	0.00713245	0.0345351	0.230143	0.677861	1	6.51457	3.02623e-05	0.000301663	Enriched GUL-1-GFP	Enriched GUL-1-GFP
NCU00321	Q7RZP3	hypothetical protein	0.33175	0.646326	0.884512	3.05412	0.00536913	0.0301143	0.169551	0.791338	1	2.55931	0.000472705	0.00256126	Enriched GUL-1-GFP	Enriched GUL-1-GFP
NCU06986	V5INW6	DUF221 domain-containing protein	0.333387	0.768449	0.935729	17.8992	1.79144e-12	1.22438e-10	0.176797	0.868857	1	24.3772	1.07966e-38	2.47804e-36	Enriched GUL-1-GFP	Enriched GUL-1-GFP
NCU00761	V5IQ24	triacylglycerol lipase	0.333397	0.721101	0.917613	20.1063	1.39476e-17	3.81305e-15	-0.108853	0.896063	1	2.52752	0.0257767	0.0542181	Enriched GUL-1-GFP
NCU03064	V5IQL9	RSC complex subunit Rsc7	0.341421	0.576163	0.851835	8.26356	0.000143358	0.0026675	0.512391	0.337634	1	2.6131	4.2961e-05	0.000404779	Enriched GUL-1-GFP	Enriched GUL-1-GFP
NCU02544	Q7SHS0	ABC transporter	0.346576	0.722102	0.917613	5.73604	0.0161583	0.0497631	0.0859479	0.922032	1	5.53747	0.00149424	0.00615945	Enriched GUL-1-GFP	Enriched GUL-1-GFP
NCU05061	Q7RXC3	hypothetical protein	0.347928	0.829176	0.956434	6.31607	0.0155291	0.0488979	3.66971	0.0325182	1	7.05192	0.000264825	0.00163992	Enriched GUL-1-GFP	Enriched GUL-1-GFP
NCU00175	Q7RXB2	hypothetical protein	0.348707	0.64332	0.883682	8.29423	0.000191595	0.00330548	0.136721	0.835551	1	3.92744	1.90299e-06	3.02475e-05	Enriched GUL-1-GFP	Enriched GUL-1-GFP
NCU01333	Q7S7W3	Delta(24(24(1)))-sterol reductase	0.354267	0.587246	0.856953	7.69026	0.000409647	0.00568705	0.216595	0.70046	1	8.74445	2.15794e-08	5.70612e-07	Enriched GUL-1-GFP	Enriched GUL-1-GFP
NCU08741	Q7SCF4	striatin Pro11	0.354717	0.61859	0.872965	6.03577	0.00632351	0.0327129	0.461447	0.463265	1	3.09423	0.00169446	0.00674258	Enriched GUL-1-GFP	Enriched GUL-1-GFP
NCU05829	Q7S5L4	hypothetical protein	0.355976	0.674481	0.896622	7.23595	0.00129492	0.012757	0.519968	0.476616	1	2.59266	0.00192337	0.00748222	Enriched GUL-1-GFP	Enriched GUL-1-GFP
NCU06374	Q7S9T2	multispanning membrane protein	0.358087	0.495218	0.801972	3.18448	3.71446e-06	0.000100607	0.157097	0.735507	1	4.18441	5.10692e-15	2.73865e-13	Enriched GUL-1-GFP	Enriched GUL-1-GFP
NCU09888	Q7S226	hypothetical protein	0.360593	0.581695	0.85415	5.44797	0.0121213	0.0435583	0.220669	0.68807	1	2.51166	0.0069705	0.020231	Enriched GUL-1-GFP	Enriched GUL-1-GFP
NCU00957	Q7SGG5	anchored cell wall protein 2	0.361574	0.613265	0.87134	6.32133	1.03053e-08	3.93816e-07	0.0563558	0.929725	1	7.26594	1.9557e-17	1.2752e-15	Enriched GUL-1-GFP	Enriched GUL-1-GFP
NCU04636	Q1K6H7	cysteine desulfurase	0.36598	0.555061	0.842258	5.67947	0.00864178	0.0375221	0.0182439	0.971958	1	1.58612	0.0863841	0.139744	Enriched GUL-1-GFP
NCU03235	Q7SGT5	sulfate permease II	0.36907	0.698241	0.90709	5.79764	0.0133749	0.0455092	0.141642	0.863746	1	6.20149	0.000280872	0.00170906	Enriched GUL-1-GFP	Enriched GUL-1-GFP
NCU00234	Q7RZX7	hypothetical protein	0.375742	0.649325	0.88562	6.77006	0.00259695	0.0200822	0.179886	0.792323	1	7.343	6.15826e-06	8.16076e-05	Enriched GUL-1-GFP	Enriched GUL-1-GFP
NCU03804	Q05681	serine/threonine-protein phosphatase 2B catalytic subunit, variant	0.375813	0.623655	0.874115	6.53932	0.0035564	0.0239838	0.333107	0.621748	1	2.44359	0.00547578	0.016695	Enriched GUL-1-GFP	Enriched GUL-1-GFP
NCU01208	V5IMA6	hypothetical protein, variant	0.377243	0.633049	0.878865	9.12012	4.8276e-05	0.00103984	0.692863	0.308938	1	9.72659	1.96798e-09	6.07112e-08	Enriched GUL-1-GFP	Enriched GUL-1-GFP
NCU02762	Q7SCM1	calcium channel subunit Cch1	0.379249	0.669752	0.895301	5.85546	0.0107787	0.0411456	0.329516	0.677638	1	5.95045	0.000358007	0.00205836	Enriched GUL-1-GFP	Enriched GUL-1-GFP
NCU06235	Q7SBS1	hypothetical protein	0.381015	0.619157	0.872965	9.66822	8.04213e-06	0.000198484	0.746855	0.189221	1	7.09842	1.4693e-14	7.46094e-13	Enriched GUL-1-GFP	Enriched GUL-1-GFP
NCU03314	V5IQ02	MOB-2A	0.381127	0.554898	0.842258	7.94261	0.000241574	0.00385002	0.571254	0.307924	1	4.70421	4.74705e-08	1.13969e-06	Enriched GUL-1-GFP	Enriched GUL-1-GFP
NCU09794	Q7S5Z9	D-binding Rossmann fold oxidoreductase	0.381924	0.638452	0.882188	6.10632	0.00723992	0.0347224	-0.358782	0.619143	1	4.96209	0.00264624	0.00953776	Enriched GUL-1-GFP	Enriched GUL-1-GFP
NCU00240	Q7RZX1	hypothetical protein	0.393317	0.679878	0.898145	18.5327	5.58106e-15	6.19847e-13	-0.132877	0.877224	1	25.4249	1.42389e-48	8.17026e-46	Enriched GUL-1-GFP	Enriched GUL-1-GFP
NCU07398	Q7S1L6	hypothetical protein	0.393502	0.563795	0.846695	5.51384	0.0116898	0.0428747	0.3734	0.52689	1	2.51375	0.00833184	0.0230511	Enriched GUL-1-GFP	Enriched GUL-1-GFP
NCU09133	Q7S2L6	ACW-7	0.397029	0.531935	0.824982	4.76523	1.04756e-08	3.96068e-07	0.49884	0.373441	1	8.85053	2.18532e-21	1.85498e-19	Enriched GUL-1-GFP	Enriched GUL-1-GFP
NCU01409	Q7S7G6	ran-binding protein	0.397998	0.60232	0.864608	6.26855	0.00544491	0.0303787	-0.395238	0.564898	1	1.59176	0.072938	0.122195	Enriched GUL-1-GFP
NCU11312	A7UWR3	CorA family metal ion transporter	0.400038	0.493158	0.801352	7.10814	0.000956015	0.0103273	0.247631	0.622972	1	2.1278	0.000549824	0.00290506	Enriched GUL-1-GFP	Enriched GUL-1-GFP
NCU06644	Q1K6W4	hypothetical protein	0.401524	0.565486	0.848028	7.02629	0.00148037	0.0139555	1.0723	0.109087	1	3.09823	0.000179044	0.00120582	Enriched GUL-1-GFP	Enriched GUL-1-GFP
NCU09300	V5IL65	R Polymerase II CTD phosphatase Fcp1	0.405086	0.603057	0.864853	5.39716	0.0160276	0.0495754	-0.131351	0.85147	1	4.56152	0.00495739	0.0154595	Enriched GUL-1-GFP	Enriched GUL-1-GFP
NCU00521	Q7SCL6	hypothetical protein	0.410308	0.691192	0.903686	19.0237	5.9066e-15	6.36123e-13	-0.0503399	0.957458	1	25.3197	1.94883e-45	6.98901e-43	Enriched GUL-1-GFP	Enriched GUL-1-GFP
NCU03325	Q7SEL9	triacylglycerol lipase	0.410771	0.468844	0.784065	9.1811	1.75505e-05	0.00041583	-0.0558412	0.907237	1	6.89913	1.49449e-12	6.44766e-11	Enriched GUL-1-GFP	Enriched GUL-1-GFP
NCU03530	Q1K5D9	anchored cell wall protein 6	0.416221	0.644883	0.883682	7.09988	0.00259383	0.0200822	0.165691	0.843169	1	6.84688	6.79699e-05	0.000583849	Enriched GUL-1-GFP	Enriched GUL-1-GFP
NCU01418	Q01302	clock-controlled gene-6	0.416388	0.399824	0.735593	3.97383	3.12392e-09	1.3878e-07	0.489103	0.271949	1	5.10043	3.63524e-22	3.31095e-20	Enriched GUL-1-GFP	Enriched GUL-1-GFP
NCU08811	Q7S8S4	arf GTPase-activating protein	0.41724	0.59784	0.863679	5.99486	0.0078182	0.0358013	0.187065	0.794515	1	5.97339	0.000248841	0.00156735	Enriched GUL-1-GFP	Enriched GUL-1-GFP
NCU01814	Q1K536	hypothetical protein	0.418891	0.640855	0.883278	5.69641	0.0132128	0.0451956	-0.211811	0.778668	1	1.49405	0.128564	0.19236	Enriched GUL-1-GFP
NCU04545	Q7RWG3	hypothetical protein	0.422856	0.577899	0.852506	5.67119	0.0108425	0.0411692	0.817335	0.212881	1	2.44715	0.0152166	0.0366862	Enriched GUL-1-GFP	Enriched GUL-1-GFP
NCU01504	Q1K5K7	calcineurin binding protein	0.426476	0.571528	0.849715	2.85543	0.0125799	0.0443542	0.802478	0.232383	1	2.77544	0.00155435	0.00632993	Enriched GUL-1-GFP	Enriched GUL-1-GFP
NCU01484	B2ZAG3	rho-type GTPase	0.428252	0.345985	0.696576	1.71277	0.00613911	0.0322281	0.305152	0.453221	1	2.69619	3.82587e-08	9.46656e-07	Enriched GUL-1-GFP	Enriched GUL-1-GFP
NCU05228	Q7S8I0	hypothetical protein	0.429687	0.387798	0.72363	4.25924	1.30513e-09	6.26814e-08	-0.600995	0.156027	1	4.50641	4.65534e-19	3.51478e-17	Enriched GUL-1-GFP	Enriched GUL-1-GFP
NCU06207	Q7SBB6	C-5 sterol desaturase	0.437815	0.363977	0.708506	1.53762	0.014013	0.0462639	-0.190744	0.663467	1	2.7304	3.50596e-08	8.86219e-07	Enriched GUL-1-GFP	Enriched GUL-1-GFP
NCU08807	O59958	D-binding protein cre-1	0.437979	0.462591	0.778229	1.99863	0.013959	0.0462359	-0.431657	0.434443	1	1.86746	0.00503947	0.0156899	Enriched GUL-1-GFP	Enriched GUL-1-GFP
NCU05154	Q1K588	calcium P-type ATPase	0.439095	0.592972	0.862133	6.05018	0.00757691	0.0352465	0.429573	0.544449	1	2.05647	0.0227445	0.0494536	Enriched GUL-1-GFP	Enriched GUL-1-GFP
NCU06493	Q05425	heterotrimeric G protein	0.439789	0.519256	0.818509	2.25559	0.0139594	0.0462359	-0.0173916	0.977075	1	2.77049	0.000112335	0.000859337	Enriched GUL-1-GFP	Enriched GUL-1-GFP
NCU08823	P22126	Ras-like protein	0.440608	0.379194	0.718728	2.50978	0.000183321	0.00320947	-0.275362	0.529481	1	3.05644	2.65002e-09	7.96117e-08	Enriched GUL-1-GFP	Enriched GUL-1-GFP
NCU01752	Q1K5R4	non-anchored cell wall protein 2	0.447003	0.381264	0.719925	5.35255	2.31489e-15	3.06473e-13	-0.195741	0.678499	1	7.23722	7.66382e-41	2.11352e-38	Enriched GUL-1-GFP	Enriched GUL-1-GFP
NCU09681	Q7S7C7	hypothetical protein	0.450266	0.493157	0.801352	2.59919	0.0105134	0.0407395	0.498819	0.362405	1	2.53416	0.000138668	0.00100719	Enriched GUL-1-GFP	Enriched GUL-1-GFP
NCU00595	Q7SI56	ubiquitin thiolesterase	0.45224	0.464071	0.779476	7.55308	0.000505541	0.00667915	0.0368316	0.945477	1	3.16837	8.30356e-06	0.000104486	Enriched GUL-1-GFP	Enriched GUL-1-GFP
NCU06467	U9W4K2	hypothetical protein	0.453082	0.558102	0.843712	3.10264	0.00205172	0.0169657	0.362166	0.544681	1	8.62293	4.87393e-08	1.16044e-06	Enriched GUL-1-GFP	Enriched GUL-1-GFP
NCU06465	Q7RYV4	SUR2	0.455518	0.342206	0.69594	2.1684	0.00119882	0.0121385	-0.343019	0.403317	1	1.9666	4.57092e-05	0.000425778	Enriched GUL-1-GFP	Enriched GUL-1-GFP
NCU01478	Q7RXV3	fungal specific transcription factor domain-containing protein	0.457555	0.430158	0.759631	6.98283	0.00115145	0.0117257	0.596206	0.218564	1	2.10493	0.00136901	0.00576374	Enriched GUL-1-GFP	Enriched GUL-1-GFP
NCU06661	Q1K6Z3	60S ribosomal protein L22	0.458707	0.366121	0.709737	6.29272	0.00299161	0.0221966	0.302437	0.46719	1	3.83517	5.2867e-05	0.000476218	Enriched GUL-1-GFP	Enriched GUL-1-GFP
NCU04316	Q1K722	pheromone processing carboxypeptidase Kex1	0.459382	0.51655	0.81758	5.78587	0.00855419	0.0373683	0.379874	0.530758	1	6.14957	0.000103183	0.000802255	Enriched GUL-1-GFP	Enriched GUL-1-GFP
NCU03312	Q7SEN2	CorA family metal ion transporter	0.459719	0.527419	0.821855	7.65234	0.00058256	0.00734253	-0.246033	0.699953	1	2.64009	0.000399591	0.00225231	Enriched GUL-1-GFP	Enriched GUL-1-GFP
NCU11395	A7UXA0	S-(hydroxymethyl)glutathione dehydrogese	0.4672	0.62248	0.873954	5.82449	0.0138684	0.0461662	0.28612	0.741592	1	1.55498	0.156513	0.225532	Enriched GUL-1-GFP
NCU03613	Q7S7V1	hypothetical protein	0.472571	0.375023	0.717774	1.9525	0.0080971	0.0365049	0.387057	0.394951	1	2.76421	1.33435e-06	2.23874e-05	Enriched GUL-1-GFP	Enriched GUL-1-GFP
NCU01635	P07041	histone H3	0.476191	0.312774	0.669464	1.71738	0.00911491	0.0384731	0.415054	0.319842	1	3.20569	3.08673e-09	9.22482e-08	Enriched GUL-1-GFP	Enriched GUL-1-GFP
NCU01966	V5IQ48	60S ribosomal protein L37, variant	0.476901	0.423423	0.754605	6.69436	0.00196426	0.016741	0.0961176	0.851296	1	2.14922	0.00389855	0.0128341	Enriched GUL-1-GFP	Enriched GUL-1-GFP
NCU04550	Q7RWE1	hypothetical protein	0.478226	0.578799	0.852855	6.03765	0.0077591	0.0358013	0.941312	0.205013	1	1.89745	0.0470239	0.0859037	Enriched GUL-1-GFP
NCU06509	U9W4K9	hypothetical protein, variant	0.481326	0.491033	0.800271	7.41821	1.16383e-15	1.79836e-13	-0.636396	0.302492	1	9.99863	6.94769e-29	9.96646e-27	Enriched GUL-1-GFP	Enriched GUL-1-GFP
NCU06360	Q7S9U6	histidinol-phosphate aminotransferase	0.487962	0.641447	0.883278	7.1648	0.00332369	0.0235063	0.482161	0.647114	1	2.07091	0.0568312	0.0998462	Enriched GUL-1-GFP
NCU09069	V5INR4	hypothetical protein	0.491103	0.557507	0.843245	6.78542	0.00283539	0.0213949	0.619704	0.393434	1	7.77444	2.31562e-06	3.55268e-05	Enriched GUL-1-GFP	Enriched GUL-1-GFP
NCU06361	V5IMI6	cwl1, variant 1	0.493226	0.594997	0.863482	18.7873	1.50192e-15	2.2241e-13	-0.499826	0.551633	1	27.3903	2.65001e-57	5.06858e-54	Enriched GUL-1-GFP	Enriched GUL-1-GFP
NCU01271	P27121	ornithine decarboxylase	0.494325	0.534974	0.828132	6.44038	0.00433806	0.0266738	0.421375	0.546769	1	2.20375	0.0164953	0.0389666	Enriched GUL-1-GFP	Enriched GUL-1-GFP
NCU00983	Q7SGD9	integral membrane protein	0.497456	0.615128	0.872619	7.02058	0.00341641	0.0236224	0.137174	0.878331	1	3.26273	0.00812204	0.0225796	Enriched GUL-1-GFP	Enriched GUL-1-GFP
NCU03440	Q1K5B2	AP-2 complex subunit alpha	0.499539	0.537431	0.829023	5.69874	0.0120086	0.0432303	1.08004	0.154213	1	5.81142	0.000405664	0.00227759	Enriched GUL-1-GFP	Enriched GUL-1-GFP
NCU09123	V5IQT6	Ca/CaM-dependent kise-1, variant 1	0.502115	0.435355	0.76309	6.27818	0.00406642	0.0259809	-0.289346	0.603177	1	7.00525	8.10868e-06	0.000102671	Enriched GUL-1-GFP	Enriched GUL-1-GFP
NCU03300	V5IRL8	D damage checkpoint protein rad24	0.502216	0.418501	0.750492	7.83225	0.000322776	0.00472076	0.230374	0.681157	1	3.38227	1.16037e-05	0.000138553	Enriched GUL-1-GFP	Enriched GUL-1-GFP
NCU08967	Q7S7E7	arrestin domain-containing protein	0.504222	0.52193	0.819843	5.48397	0.0138523	0.0461662	1.38227	0.0589584	1	0.078217	0.920112	0.944642	Enriched GUL-1-GFP
NCU07523	Q7S324	1,3-beta glucase	0.505964	0.495843	0.801972	6.50594	0.00344052	0.0236719	2.11484	0.00682406	1	6.78565	2.33004e-05	0.000247131	Enriched GUL-1-GFP	Enriched GUL-1-GFP
NCU04615	Q1K6A7	osmolarity two-component system protein sln1	0.507552	0.564205	0.847009	6.44268	0.00537211	0.0301143	-0.0460754	0.953373	1	5.43976	0.00123925	0.00536261	Enriched GUL-1-GFP	Enriched GUL-1-GFP
NCU03141	O42790	lysophospholipase	0.507988	0.467998	0.783891	4.91286	6.15643e-07	1.87008e-05	-0.0241665	0.967184	1	3.95459	3.2971e-09	9.80247e-08	Enriched GUL-1-GFP	Enriched GUL-1-GFP
NCU04493	Q7RYB4	hypothetical protein	0.5126	0.702249	0.909595	20.2105	1.4093e-13	1.11303e-11	-0.0889882	0.944833	1	2.2184	0.137291	0.2026	Enriched GUL-1-GFP
NCU02945	Q7SHF9	hypothetical protein	0.514981	0.481025	0.792196	5.72404	0.0102604	0.040313	0.0229326	0.971305	1	1.07204	0.194029	0.269443	Enriched GUL-1-GFP
NCU07590	Q7SBG6	Ser/Thr protein phosphatase	0.517399	0.489117	0.797457	5.72273	0.0104053	0.0405401	0.449371	0.5033	1	2.20529	0.0305694	0.0616568	Enriched GUL-1-GFP
NCU02599	Q7SG21	BAP31 domain-containing protein	0.51767	0.611268	0.870416	17.6133	3.90835e-13	2.89381e-11	0.301699	0.746663	1	24.5185	3.34384e-43	1.06594e-40	Enriched GUL-1-GFP	Enriched GUL-1-GFP
NCU09101	Q7SFP9	hypothetical protein	0.518967	0.543677	0.83065	7.88322	0.000537609	0.00699877	0.771822	0.30106	1	8.84328	8.29743e-08	1.86708e-06	Enriched GUL-1-GFP	Enriched GUL-1-GFP
NCU07002	Q7SAE9	THO complex component	0.520243	0.31721	0.67441	2.1828	0.0040612	0.0259809	0.608027	0.198779	1	2.09331	0.000133844	0.000983353	Enriched GUL-1-GFP	Enriched GUL-1-GFP
NCU06122	Q7S5G6	GTPase activating protein Sar1	0.520879	0.418578	0.750492	2.47114	0.00658892	0.033239	0.966264	0.0947734	1	8.33938	9.14617e-08	2.05003e-06	Enriched GUL-1-GFP	Enriched GUL-1-GFP
NCU00537	Q7SDK7	hypothetical protein	0.521359	0.527011	0.821523	5.84226	0.0101067	0.040278	0.489908	0.508951	1	2.01473	0.041295	0.0779443	Enriched GUL-1-GFP
NCU07817	Q7SBE7	non-anchored cell wall protein 3	0.521905	0.243013	0.599484	1.71487	0.00870538	0.0376386	0.225791	0.560201	1	1.132	0.0119678	0.0304935	Enriched GUL-1-GFP	Enriched GUL-1-GFP
NCU07430	Q7SF22	MADS box protein	0.524772	0.534814	0.828132	5.66392	0.0135134	0.0457347	0.127992	0.86661	1	5.07846	0.00230725	0.00860467	Enriched GUL-1-GFP	Enriched GUL-1-GFP
NCU01629	Q1K4M4	hypothetical protein	0.525445	0.569932	0.849579	6.33338	0.00644046	0.0328871	0.737487	0.358016	1	6.37028	0.000165339	0.00114163	Enriched GUL-1-GFP	Enriched GUL-1-GFP
NCU06001	Q7S2F5	hypothetical protein	0.52605	0.605437	0.867021	7.21403	0.00198609	0.0168061	0.0047661	0.995507	1	3.00891	0.00901822	0.0245128	Enriched GUL-1-GFP	Enriched GUL-1-GFP
NCU08297	V5IM58	cell division control protein 3	0.526173	0.314574	0.672087	2.6873	7.32961e-05	0.00150575	0.256552	0.58293	1	4.18001	1.21176e-14	6.20812e-13	Enriched GUL-1-GFP	Enriched GUL-1-GFP
NCU07367	Q7S2J5	proteasome 26S subunit	0.527897	0.461514	0.778229	5.46788	0.013173	0.0451465	-0.181902	0.76465	1	0.0945257	0.904564	0.93302	Enriched GUL-1-GFP
NCU00073	Q7RX77	hypothetical protein	0.52839	0.470137	0.785297	5.74095	0.00926866	0.0388453	0.58139	0.34833	1	2.25811	0.0214608	0.0473258	Enriched GUL-1-GFP	Enriched GUL-1-GFP
NCU02738	V5IQJ2	EF hand domain-containing protein, variant	0.530728	0.540637	0.82947	5.50627	0.0157915	0.0492308	0.559871	0.452583	1	5.85418	0.000400333	0.00225428	Enriched GUL-1-GFP	Enriched GUL-1-GFP
NCU05726	Q7SB86	mucin	0.531392	0.438176	0.765291	5.71085	0.00914112	0.0385036	0.439115	0.461797	1	3.51303	0.00346367	0.0116924	Enriched GUL-1-GFP	Enriched GUL-1-GFP
NCU00280	Q7RZT4	hypothetical protein	0.53143	0.437662	0.765229	5.85796	0.00739944	0.0348868	2.59855	0.000723223	0.452583	1.32012	0.0881907	0.142014	Enriched GUL-1-GFP
NCU04479	Q7RYC8	LAP2	0.531858	0.628205	0.875303	18.1124	3.48521e-13	2.63541e-11	-0.419418	0.679617	1	0.544465	0.665535	0.734674	Enriched GUL-1-GFP
NCU01955	Q7SDY2	autophagocytosis protein Aut1	0.533767	0.438642	0.765291	6.42657	0.00345687	0.0236719	-0.333352	0.576788	1	-0.0758529	0.915433	0.940788	Enriched GUL-1-GFP
NCU02842	Q7SDQ7	hypothetical protein	0.535095	0.350175	0.700993	3.33057	8.56546e-05	0.00171987	-0.0809295	0.86266	1	4.87447	2.07622e-13	9.76504e-12	Enriched GUL-1-GFP	Enriched GUL-1-GFP
NCU05785	Q7S5Q8	DUF907 domain-containing protein	0.535376	0.430743	0.759631	8.15851	0.000205493	0.00344492	0.490308	0.409482	1	8.89964	1.79993e-08	4.8717e-07	Enriched GUL-1-GFP	Enriched GUL-1-GFP
NCU03786	Q7S7P2	serine/threonine protein phosphatase 2A	0.535715	0.495726	0.801972	6.26331	0.00554175	0.0308222	0.47009	0.504818	1	2.04706	0.0263341	0.0550674	Enriched GUL-1-GFP
NCU04603	Q1K6B7	hypothetical protein	0.537205	0.355718	0.703028	6.009	2.0999e-15	2.98521e-13	0.551084	0.29563	1	7.07423	1.17467e-31	1.8217e-29	Enriched GUL-1-GFP	Enriched GUL-1-GFP
NCU00905	Q7SCV1	N-acylethanolamine amidohydrolase	0.552671	0.552764	0.840253	5.59581	0.0157757	0.0492246	0.342061	0.665675	1	2.14599	0.058352	0.101987	Enriched GUL-1-GFP
NCU08072	Q7SGL2	cell wall glucase	0.553664	0.351477	0.701119	2.90344	6.77972e-05	0.00141736	0.754786	0.108324	1	4.0736	3.7543e-12	1.56103e-10	Enriched GUL-1-GFP	Enriched GUL-1-GFP
NCU06047	Q7S503	40S ribosomal protein S2	0.554285	0.28604	0.642982	2.59462	0.00259468	0.0200822	0.823227	0.0729605	1	2.25923	7.80246e-05	0.000650735	Enriched GUL-1-GFP	Enriched GUL-1-GFP
NCU06729	Q05424	G-protein alpha subunit	0.556013	0.481308	0.792196	5.56986	0.0131268	0.0450747	-0.322746	0.631735	1	1.77953	0.0707311	0.119255	Enriched GUL-1-GFP
NCU01510	Q1K5K5	meiotically up-regulated 190 protein	0.559047	0.571866	0.849715	19.3912	1.08723e-15	1.75638e-13	0.354256	0.701119	1	2.6482	0.0184975	0.0424725	Enriched GUL-1-GFP	Enriched GUL-1-GFP
NCU06194	Q7SBH9	MBOAT family protein	0.559371	0.428121	0.758527	6.25554	0.00417151	0.0261013	0.647137	0.266258	1	2.85051	0.000258937	0.0016185	Enriched GUL-1-GFP	Enriched GUL-1-GFP
NCU05219	V5IN38	hypothetical protein	0.561223	0.440353	0.765501	6.54384	0.00322857	0.0232274	0.0213485	0.973951	1	2.0758	0.0105799	0.0276951	Enriched GUL-1-GFP	Enriched GUL-1-GFP
NCU03928	Q7RZC6	hypothetical protein	0.568966	0.329529	0.68641	11.73	5.32316e-08	1.87312e-06	0.419323	0.407623	1	7.86379	5.00319e-28	6.83531e-26	Enriched GUL-1-GFP	Enriched GUL-1-GFP
NCU04415	V5IMN5	hypothetical protein, variant	0.569636	0.552167	0.83968	7.1605	0.00296098	0.0220737	0.00848611	0.992543	1	1.54541	0.180227	0.253338	Enriched GUL-1-GFP
NCU01895	V5INZ8	response regulator, variant	0.569959	0.361715	0.706838	5.73414	0.00803475	0.0364018	0.893101	0.0937045	1	2.34036	0.00423463	0.0137201	Enriched GUL-1-GFP	Enriched GUL-1-GFP
NCU08319	V5IMF6	developmental regulator flbA	0.573401	0.497362	0.80229	7.03823	0.00204894	0.0169657	0.152508	0.833559	1	3.14581	0.00101411	0.00460727	Enriched GUL-1-GFP	Enriched GUL-1-GFP
NCU09309	Q7SD84	proteasome component PRE2	0.573578	0.418405	0.750492	5.32356	0.0154182	0.0487947	0.414666	0.500935	1	5.49342	0.000515975	0.00275924	Enriched GUL-1-GFP	Enriched GUL-1-GFP
NCU09748	Q7SEH7	transcription initiation factor IIA gamma chain	0.574599	0.519094	0.818509	5.87632	0.0113668	0.0420566	-0.157532	0.841597	1	5.52485	0.00107665	0.00482237	Enriched GUL-1-GFP	Enriched GUL-1-GFP
NCU06944	V5IKU1	hypothetical protein	0.578178	0.545963	0.832647	5.8713	0.0128232	0.0446274	0.242767	0.77594	1	2.27791	0.0302759	0.061127	Enriched GUL-1-GFP
NCU06850	Q1K8K4	1,3-beta-glucanosyltransferase gel3	0.5818	0.634075	0.879423	6.75395	0.0070707	0.0343296	-0.488628	0.653741	1	6.53763	0.000401653	0.0022595	Enriched GUL-1-GFP	Enriched GUL-1-GFP
NCU02282	Q7S586	aureobasidin-resistance protein	0.58574	0.482516	0.793428	8.17285	0.000351581	0.00497816	0.409457	0.579334	1	3.63584	6.36971e-05	0.000550482	Enriched GUL-1-GFP	Enriched GUL-1-GFP
NCU00621	Q7SI31	TORC1 growth control complex subunit Kog1	0.589015	0.296083	0.654075	5.66191	0.00823262	0.0367844	0.044357	0.929041	1	-0.201851	0.726969	0.78943	Enriched GUL-1-GFP
NCU02209	Q7S463	delta-12 fatty acid desaturase	0.591394	0.347188	0.697679	7.26524	0.000888115	0.0098469	0.440743	0.433261	1	7.03941	7.43802e-06	9.59087e-05	Enriched GUL-1-GFP	Enriched GUL-1-GFP
NCU08995	U9WH41	dual specificity phosphatase	0.592561	0.353705	0.703028	5.9229	0.00593374	0.0318077	-0.0948474	0.854898	1	0.446762	0.477647	0.564035	Enriched GUL-1-GFP
NCU05435	F5HCN3	hypothetical protein	0.596013	0.405924	0.741009	3.11829	0.00171732	0.0153737	0.00424743	0.994679	1	4.52492	6.77551e-09	1.91517e-07	Enriched GUL-1-GFP	Enriched GUL-1-GFP
NCU11109	A7UWQ4	ORM1	0.597821	0.308265	0.667039	8.21636	0.000149687	0.00274118	0.0497537	0.924289	1	1.44619	0.0182553	0.0421187	Enriched GUL-1-GFP	Enriched GUL-1-GFP
NCU07564	Q7S1Y9	siderophore iron transporter mirC	0.598907	0.317163	0.67441	6.0897	0.00469468	0.0278546	0.26909	0.599233	1	3.26712	0.000301787	0.00180193	Enriched GUL-1-GFP	Enriched GUL-1-GFP
NCU03678	Q96UB6	ssh-4	0.599562	0.278434	0.634869	1.96797	0.00963912	0.0394671	-0.102817	0.830096	1	2.48649	1.02092e-05	0.000124375	Enriched GUL-1-GFP	Enriched GUL-1-GFP
NCU04518	Q7RY45	hypothetical protein	0.605677	0.552121	0.83968	6.18477	0.00830834	0.0368182	0.70985	0.403234	1	6.81987	6.43383e-05	0.000555148	Enriched GUL-1-GFP	Enriched GUL-1-GFP
NCU03600	Q1K7S2	GTP-binding protein EsdC	0.607036	0.322752	0.681635	3.49316	4.10141e-05	0.000905367	-0.73395	0.214699	1	3.61697	6.51741e-08	1.50794e-06	Enriched GUL-1-GFP	Enriched GUL-1-GFP
NCU02016	Q7SFL6	hypothetical protein	0.607414	0.469891	0.785196	5.65435	0.0135277	0.0457347	0.495836	0.507051	1	6.16776	0.000203869	0.00133598	Enriched GUL-1-GFP	Enriched GUL-1-GFP
NCU06942	Q7S0H4	vacuolar protein sorting-associated protein VPS4	0.60836	0.485199	0.793599	5.59532	0.0153577	0.0487333	-0.201154	0.799057	1	5.52122	0.00100147	0.00457884	Enriched GUL-1-GFP	Enriched GUL-1-GFP
NCU03120	V5IRK5	hypothetical protein	0.6092	0.526448	0.821493	6.05102	0.0105662	0.0407395	0.550499	0.525371	1	5.73442	0.000905669	0.00423146	Enriched GUL-1-GFP	Enriched GUL-1-GFP
NCU06687	O93869	glycogen synthase, variant 1	0.609879	0.388054	0.72363	6.04133	0.00659356	0.033239	0.455643	0.478764	1	0.916792	0.256478	0.33847	Enriched GUL-1-GFP
NCU09104	Q7SFP6	hypothetical protein	0.611399	0.319854	0.677545	2.67134	0.00444579	0.0271018	0.117472	0.831469	1	2.44292	0.000248481	0.0015668	Enriched GUL-1-GFP	Enriched GUL-1-GFP
NCU02745	V5IPM7	hypothetical protein, variant 1	0.612862	0.371699	0.714394	6.31913	0.00405594	0.0259809	0.122898	0.834674	1	1.39925	0.0738718	0.123363	Enriched GUL-1-GFP
NCU02811	Q7SEK3	hyphal astamosis-8 protein	0.61331	0.285023	0.64172	2.01296	0.013287	0.0453622	0.148308	0.770826	1	1.77149	0.00301619	0.0105567	Enriched GUL-1-GFP	Enriched GUL-1-GFP
NCU06317	Q7SAB4	stress response RCI peptide	0.613456	0.524253	0.820531	7.32504	0.0020366	0.0169657	-0.119128	0.890488	1	6.97002	5.82048e-05	0.000513427	Enriched GUL-1-GFP	Enriched GUL-1-GFP
NCU04199	Q1K7D5	hypothetical protein	0.614875	0.407656	0.741485	5.79124	0.00855601	0.0373683	-0.156551	0.804376	1	2.93835	0.00262439	0.00947445	Enriched GUL-1-GFP	Enriched GUL-1-GFP
NCU00041	Q7RWT0	guanine nucleotide-binding protein subunit gamma	0.61969	0.237472	0.59382	7.95301	2.94441e-26	2.6161e-23	0.137464	0.751667	1	8.49673	1.42048e-46	6.79228e-44	Enriched GUL-1-GFP	Enriched GUL-1-GFP
NCU01642	Q7RWZ8	hypothetical protein	0.623927	0.382395	0.721159	3.4108	0.000392835	0.00547505	0.326364	0.620222	1	6.18893	4.15276e-14	2.05418e-12	Enriched GUL-1-GFP	Enriched GUL-1-GFP
NCU03284	Q7SDX1	hypothetical protein	0.626672	0.569308	0.849579	8.76143	0.000379372	0.00532698	0.219982	0.824911	1	7.31043	5.43771e-05	0.000485485	Enriched GUL-1-GFP	Enriched GUL-1-GFP
NCU09307	Q7SD86	hypothetical protein	0.627916	0.418063	0.750492	2.91167	0.00354464	0.0239499	-0.227305	0.724487	1	4.62204	1.5287e-08	4.19698e-07	Enriched GUL-1-GFP	Enriched GUL-1-GFP
NCU01756	P78712	actin	0.629654	0.454435	0.775228	6.40408	0.00514625	0.0295055	0.365128	0.63237	1	6.44884	0.000102862	0.000800848	Enriched GUL-1-GFP	Enriched GUL-1-GFP
NCU06910	V5IKT6	WSC-1, variant 2	0.630446	0.273831	0.629881	4.07645	1.22367e-07	4.06441e-06	-0.0699177	0.895117	1	5.2033	8.78621e-18	6.00182e-16	Enriched GUL-1-GFP	Enriched GUL-1-GFP
NCU08954	Q1K6L1	hypothetical protein	0.630917	0.524101	0.820531	6.55086	0.00618907	0.0322932	-0.404645	0.649258	1	6.50018	0.000203129	0.00133359	Enriched GUL-1-GFP	Enriched GUL-1-GFP
NCU05163	Q7S8H0	hypothetical protein	0.631061	0.52007	0.818859	3.67495	0.00453205	0.0274803	0.651357	0.464882	1	9.1864	7.32478e-08	1.67448e-06	Enriched GUL-1-GFP	Enriched GUL-1-GFP
NCU02202	Q7S470	serine/threonine kise IREI	0.632128	0.34958	0.700487	3.03634	0.00633341	0.0327165	0.716414	0.23972	1	1.8105	0.0149382	0.0362126	Enriched GUL-1-GFP	Enriched GUL-1-GFP
NCU09677	Q7S7C8	UPF0187 domain membrane protein	0.632193	0.379345	0.718728	2.61096	0.00661595	0.033286	0.0471672	0.936801	1	9.20172	6.51624e-09	1.851e-07	Enriched GUL-1-GFP	Enriched GUL-1-GFP
NCU08054	Q7SGM9	beta-glucosidase 1	0.632917	0.385766	0.72363	5.95927	0.00726885	0.0347224	0.114345	0.861033	1	6.04068	0.000161461	0.00112571	Enriched GUL-1-GFP	Enriched GUL-1-GFP
NCU06836	P16929	acetyl-coenzyme A synthetase	0.637432	0.214644	0.572654	1.80966	0.0104125	0.0405401	-0.895454	0.0552243	1	3.43612	5.62604e-09	1.61411e-07	Enriched GUL-1-GFP	Enriched GUL-1-GFP
NCU01584	V5IR46	hypothetical protein	0.639156	0.309985	0.667258	7.41213	0.000619632	0.00764643	0.936781	0.0963594	1	7.98045	2.75018e-07	5.44155e-06	Enriched GUL-1-GFP	Enriched GUL-1-GFP
NCU02542	V5IP39	hexokise, variant	0.639537	0.245795	0.604602	1.9578	0.0145695	0.0471718	0.456857	0.35072	1	1.72149	0.00347778	0.0117247	Enriched GUL-1-GFP	Enriched GUL-1-GFP
NCU08791	Q9C168	catalase-1	0.639709	0.379122	0.718728	6.37078	0.00413948	0.0261013	0.160969	0.801406	1	1.95363	0.0149854	0.0362811	Enriched GUL-1-GFP	Enriched GUL-1-GFP
NCU05721	Q7SB91	arrestin domain-containing protein	0.642592	0.513856	0.814537	20.3745	1.81851e-17	4.61641e-15	0.0334405	0.970087	1	3.6163	0.00118457	0.00515743	Enriched GUL-1-GFP	Enriched GUL-1-GFP
NCU06242	Q7SBR5	lectin family integral membrane protein	0.643109	0.266959	0.619655	2.75354	0.00166049	0.0149782	0.211261	0.659914	1	2.63437	1.16348e-05	0.000138553	Enriched GUL-1-GFP	Enriched GUL-1-GFP
NCU09240	V5IQR6	hypothetical protein, variant	0.645821	0.292155	0.648678	6.08235	0.00492552	0.0289823	-0.128311	0.806235	1	1.88866	0.00957972	0.0256622	Enriched GUL-1-GFP	Enriched GUL-1-GFP
NCU07491	Q7SG51	hypothetical protein	0.647219	0.407013	0.741485	6.11359	0.0069405	0.0340281	0.182498	0.792835	1	0.810363	0.359323	0.44705	Enriched GUL-1-GFP
NCU00974	V5IRN9	glutaredoxin	0.648071	0.52237	0.820022	6.19141	0.00832575	0.0368182	0.650426	0.447695	1	6.10328	0.000358767	0.00206067	Enriched GUL-1-GFP	Enriched GUL-1-GFP
NCU02373	P25284	DH-ubiquinone oxidoreductase 40 kDa subunit	0.65111	0.410642	0.74276	6.26121	0.00563848	0.0310499	-0.197265	0.777231	1	0.767471	0.363869	0.451337	Enriched GUL-1-GFP
NCU02470	Q7SG93	hypothetical protein	0.651139	0.435716	0.763296	5.85346	3.68652e-09	1.61752e-07	0.0870156	0.900228	1	12.3043	1.08421e-14	5.65566e-13	Enriched GUL-1-GFP	Enriched GUL-1-GFP
NCU03641	V5IM00	beta-glucosidase 2, variant	0.652634	0.369052	0.712803	6.08033	0.00543869	0.0303787	0.289289	0.61075	1	1.38019	0.0628082	0.108161	Enriched GUL-1-GFP
NCU09883	Q7S231	hypothetical protein	0.652936	0.42022	0.751758	9.75941	1.64427e-05	0.000392196	0.635235	0.382046	1	10.0297	9.42406e-10	3.09001e-08	Enriched GUL-1-GFP	Enriched GUL-1-GFP
NCU02610	V5IRH6	dynein light chain type 1	0.652964	0.390383	0.726126	5.90477	0.00838194	0.0369138	-0.298275	0.651769	1	5.90166	0.000265813	0.00164357	Enriched GUL-1-GFP	Enriched GUL-1-GFP
NCU08642	V5IRJ7	cyclic nucleotide-binding domain-containing protein, variant	0.653213	0.335344	0.691866	5.67573	0.0093022	0.03894	0.0535428	0.929601	1	3.01465	0.0014608	0.0060608	Enriched GUL-1-GFP	Enriched GUL-1-GFP
NCU16802	V5IQ79	hypothetical protein	0.655158	0.409995	0.74276	7.49994	2.29272e-11	1.33579e-09	0.0777748	0.902417	1	9.68907	2.13295e-19	1.63185e-17	Enriched GUL-1-GFP	Enriched GUL-1-GFP
NCU05008	P11943	acp-1	0.656739	0.443161	0.768169	6.04174	0.00789037	0.0360442	0.341115	0.647403	1	6.16753	0.0001818	0.00121866	Enriched GUL-1-GFP	Enriched GUL-1-GFP
NCU10687	A7UW04	hypothetical protein	0.656877	0.310052	0.667258	3.06146	0.000432694	0.00591459	-0.159263	0.791487	1	9.2867	2.20107e-09	6.6824e-08	Enriched GUL-1-GFP	Enriched GUL-1-GFP
NCU07504	Q7SG38	major facilitator superfamily transporter MFS1	0.65976	0.397988	0.73289	5.65182	0.0110162	0.0415182	1.21262	0.0673317	1	2.03923	0.0255977	0.0539603	Enriched GUL-1-GFP
NCU06651	Q1K6M9	AN1-type zinc finger protein	0.660671	0.152147	0.496081	1.92754	0.00201868	0.0169607	0.238735	0.562291	1	1.95877	4.53545e-05	0.000423161	Enriched GUL-1-GFP	Enriched GUL-1-GFP
NCU02723	Q7SGC6	SFT2 domain-containing protein	0.661583	0.528707	0.822649	5.93182	0.0146683	0.047349	0.307942	0.747379	1	5.40274	0.00244953	0.00902143	Enriched GUL-1-GFP	Enriched GUL-1-GFP
NCU00484	Q7RWU3	DH:ubiquinone oxidoreductase 18.4kD subunit	0.665192	0.440957	0.766235	6.15018	0.00755593	0.0352412	-0.10202	0.89353	1	6.07324	0.000281571	0.00170969	Enriched GUL-1-GFP	Enriched GUL-1-GFP
NCU10775	V5IKM9	DPH oxidase 2	0.665476	0.281921	0.637793	7.92973	0.000230761	0.00372783	-0.0261278	0.95897	1	3.8474	5.37387e-09	1.55734e-07	Enriched GUL-1-GFP	Enriched GUL-1-GFP
NCU05294	Q7S904	C6 finger domain-containing protein	0.669411	0.355738	0.703028	6.85868	0.00193029	0.0166251	1.06579	0.104563	1	3.18512	6.00208e-05	0.000524999	Enriched GUL-1-GFP	Enriched GUL-1-GFP
NCU09201	Q1K6D9	hypothetical protein	0.674598	0.54083	0.82947	18.0195	4.27366e-13	3.09971e-11	-0.0703205	0.944461	1	24.1035	1.79076e-39	4.28142e-37	Enriched GUL-1-GFP	Enriched GUL-1-GFP
NCU04287	F5HGN4	hypothetical protein	0.675525	0.207683	0.565321	2.725	0.000168359	0.00300677	-0.187459	0.708501	1	3.77781	9.83433e-11	3.48329e-09	Enriched GUL-1-GFP	Enriched GUL-1-GFP
NCU06628	Q7S8B8	SH3 domain-containing protein	0.676015	0.382764	0.721159	8.16026	0.000257209	0.00399403	0.699468	0.298773	1	8.41098	1.78309e-07	3.70939e-06	Enriched GUL-1-GFP	Enriched GUL-1-GFP
NCU08820	Q7S8F0	hypothetical protein	0.678975	0.3551	0.703028	3.87427	0.000153915	0.00277673	-0.423681	0.507363	1	4.27754	2.36229e-08	6.1894e-07	Enriched GUL-1-GFP	Enriched GUL-1-GFP
NCU02452	Q7S454	TLDc domain-containing protein 2	0.680521	0.35568	0.703028	5.37287	0.0144713	0.0470548	0.991193	0.104827	1	5.5301	0.000471543	0.00255981	Enriched GUL-1-GFP	Enriched GUL-1-GFP
NCU14085	#N/A		0.68413	0.501327	0.804345	6.03603	0.0124113	0.0440512	-0.0495385	0.956847	1	6.06002	0.00060912	0.00313184	Enriched GUL-1-GFP	Enriched GUL-1-GFP
NCU00440	F5HH30	guanine nucleotide-binding protein beta subunit	0.684162	0.243141	0.599484	9.76856	5.40361e-06	0.000140178	0.322689	0.525233	1	10.7819	2.30088e-12	9.63684e-11	Enriched GUL-1-GFP	Enriched GUL-1-GFP
NCU00188	Q7RX99	ATG1 protein	0.685727	0.132064	0.465472	7.84013	0.00019733	0.00335556	0.3527	0.370103	1	2.09355	1.64708e-05	0.000184037	Enriched GUL-1-GFP	Enriched GUL-1-GFP
NCU07668	Q7S9N2	MFS multidrug transporter	0.686511	0.462265	0.778229	5.78553	0.0135324	0.0457347	-0.0363184	0.964981	1	6.18846	0.000287426	0.00173972	Enriched GUL-1-GFP	Enriched GUL-1-GFP
NCU01036	Q1K8C4	DUF907 domain-containing protein	0.688043	0.195843	0.554658	2.9731	9.71065e-06	0.000234773	0.259597	0.563189	1	4.11461	1.12052e-14	5.79238e-13	Enriched GUL-1-GFP	Enriched GUL-1-GFP
NCU00879	V5IQ04	WD domain-containing protein	0.688593	0.337753	0.695249	3.53266	0.000571185	0.00727595	0.204472	0.741553	1	5.18953	5.37327e-10	1.79255e-08	Enriched GUL-1-GFP	Enriched GUL-1-GFP
NCU03357	V5IN07	ubiquitin conjugation factor E4, variant	0.693255	0.445086	0.768983	6.00743	0.00949395	0.0392504	1.05854	0.194782	1	1.58373	0.0997734	0.156549	Enriched GUL-1-GFP
NCU08480	Q7RV23	HSF-type D-binding domain-containing protein	0.696272	0.347565	0.698104	6.06863	0.00648337	0.0329641	-0.234863	0.719446	1	6.23194	0.000107278	0.000826619	Enriched GUL-1-GFP	Enriched GUL-1-GFP
NCU07683	Q7S9L9	small nuclear ribonucleoprotein	0.696526	0.410488	0.74276	5.74011	0.0119216	0.0431579	-0.258659	0.725621	1	1.1459	0.255278	0.337553	Enriched GUL-1-GFP
NCU04090	Q7RWL9	niemann-Pick C1 protein	0.697788	0.270539	0.625425	7.17643	0.00102856	0.0108129	0.403783	0.473822	1	2.67008	0.000226288	0.00145077	Enriched GUL-1-GFP	Enriched GUL-1-GFP
NCU04635	Q1K6H8	hypothetical protein	0.699504	0.424536	0.756042	5.89927	0.0106374	0.0408386	0.442721	0.568925	1	6.21438	0.00021255	0.00138121	Enriched GUL-1-GFP	Enriched GUL-1-GFP
NCU02355	Q7S4X0	hypothetical protein	0.702712	0.235831	0.59358	4.82842	1.51473e-06	4.23885e-05	0.49213	0.33106	1	4.01835	7.74258e-11	2.77668e-09	Enriched GUL-1-GFP	Enriched GUL-1-GFP
NCU03929	Q1K5Y9	acyl-CoA synthetase	0.708579	0.189682	0.545816	6.72511	0.00161675	0.0147332	0.893457	0.0599872	1	1.84027	0.00257114	0.0093671	Enriched GUL-1-GFP	Enriched GUL-1-GFP
NCU02758	Q7SCX6	G2/mitotic-specific cyclin-B	0.709595	0.351737	0.701119	5.55511	0.0127273	0.044494	1.00747	0.124069	1	2.13919	0.0353698	0.0689606	Enriched GUL-1-GFP
NCU08066	Q7SGL7	amino acid transporter	0.713366	0.32355	0.681759	5.98097	0.0068133	0.0338191	1.0493	0.0945023	1	6.65658	2.89219e-05	0.000290638	Enriched GUL-1-GFP	Enriched GUL-1-GFP
NCU07465	V5IPW8	mitochondrial phosphate carrier protein 2	0.714962	0.475597	0.788512	18.2899	3.08991e-14	2.81578e-12	0.443262	0.633913	1	0.943525	0.405738	0.493247	Enriched GUL-1-GFP
NCU01335	Q1K7U1	cell division control protein 15	0.71504	0.25603	0.614066	6.19238	0.00438284	0.0268563	0.364802	0.508768	1	6.46787	3.38648e-05	0.000332165	Enriched GUL-1-GFP	Enriched GUL-1-GFP
NCU00273	Q7RZU0	hypothetical protein	0.715049	0.278577	0.634869	5.7942	0.00802082	0.0364018	-0.233833	0.711563	1	0.586043	0.411183	0.498387	Enriched GUL-1-GFP
NCU02152	V5IQ03	RRM domain-containing protein, variant	0.716421	0.360691	0.70634	6.70535	0.00296684	0.0220737	0.67964	0.324372	1	1.58023	0.069217	0.117124	Enriched GUL-1-GFP
NCU09821	Q7SCP6	oxidoreductase	0.716636	0.34046	0.695385	5.84504	0.00905913	0.03837	0.304339	0.649142	1	-0.341267	0.651134	0.722531	Enriched GUL-1-GFP
NCU02359	Q7S4W7	hypothetical protein	0.717627	0.363204	0.707915	5.78997	0.00961336	0.0394621	1.06979	0.131307	1	0.90832	0.268729	0.352128	Enriched GUL-1-GFP
NCU17104	V5IKY6	hypothetical protein	0.720248	0.329303	0.68641	6.07793	0.00455253	0.0274803	0.673552	0.201641	1	2.10803	0.00372634	0.0123522	Enriched GUL-1-GFP	Enriched GUL-1-GFP
NCU06181	Q7SBI9	hypothetical protein	0.720508	0.236409	0.59382	6.04492	0.00515237	0.0295055	0.388625	0.462961	1	2.03493	0.00746593	0.0213014	Enriched GUL-1-GFP	Enriched GUL-1-GFP
NCU00897	Q7SFD5	Sin3 complex subunit	0.722017	0.387182	0.72363	5.64573	0.0125178	0.0442669	0.220334	0.756044	1	1.7336	0.0610151	0.105549	Enriched GUL-1-GFP
NCU04444	Q7RZ30	hypothetical protein	0.728214	0.392553	0.72792	6.33867	0.00570884	0.0312937	0.359473	0.634397	1	3.26644	0.00131643	0.00558703	Enriched GUL-1-GFP	Enriched GUL-1-GFP
NCU04190	Q9HE88	exocyst complex component Sec8	0.728301	0.446887	0.770181	5.81379	0.0136789	0.0458908	0.352403	0.687236	1	2.90448	0.0085919	0.0236226	Enriched GUL-1-GFP	Enriched GUL-1-GFP
NCU03736	Q7S7X5	hypothetical protein	0.729576	0.368399	0.712193	5.91796	0.00863967	0.0375221	-0.288826	0.673526	1	1.58646	0.0731623	0.122464	Enriched GUL-1-GFP
NCU04266	Q1K7I1	hypothetical protein	0.732041	0.358438	0.705063	6.41168	0.0047996	0.0283823	0.0815693	0.909109	1	-0.195824	0.816401	0.860807	Enriched GUL-1-GFP
NCU04732	Q7S6H3	hypothetical protein	0.733261	0.152252	0.496081	1.94195	0.0022835	0.0183926	0.419645	0.328058	1	3.60728	7.76824e-13	3.48236e-11	Enriched GUL-1-GFP	Enriched GUL-1-GFP
NCU09357	Q7S2N1	stage V sporulation protein K	0.733466	0.586094	0.856739	6.62445	0.0141494	0.046562	-0.841937	0.535953	1	5.67904	0.00474307	0.0149127	Enriched GUL-1-GFP	Enriched GUL-1-GFP
NCU02464	Q7RW14	neurol-specific septin-3	0.733594	0.315798	0.67334	5.65312	0.0109619	0.0414011	0.21177	0.742822	1	1.54269	0.0921922	0.147189	Enriched GUL-1-GFP
NCU09514	Q7S1Q1	hypothetical protein	0.734436	0.246049	0.604602	2.24296	0.0096592	0.0394761	-0.0387907	0.943577	1	2.19277	0.0012424	0.00536833	Enriched GUL-1-GFP	Enriched GUL-1-GFP
NCU07565	Q7S1Y8	von Willebrand RING finger domain-containing protein	0.735364	0.2431	0.599484	6.4157	0.00274035	0.0208549	-0.602127	0.234083	1	3.05033	9.57836e-05	0.000758078	Enriched GUL-1-GFP	Enriched GUL-1-GFP
NCU03425	Q1K5C3	threonine synthase	0.735872	0.180955	0.537569	6.5809	0.00204879	0.0169657	1.76273	0.0010106	0.47342	2.11744	0.000748889	0.0036822	Enriched GUL-1-GFP	Enriched GUL-1-GFP
NCU07447	Q7SF08	proteasome activator subunit 3/P28 gamma	0.735878	0.439203	0.765291	5.79807	0.0126262	0.0443943	0.288461	0.722563	1	2.47732	0.0195436	0.0442372	Enriched GUL-1-GFP	Enriched GUL-1-GFP
NCU02576	V5IP62	C6 finger domain-containing protein	0.737048	0.161023	0.510106	6.65808	0.00177034	0.0156903	-0.2705	0.539051	1	6.90997	5.61231e-06	7.61311e-05	Enriched GUL-1-GFP	Enriched GUL-1-GFP
NCU02826	Q7RUV4	sodium/calcium exchanger protein	0.740335	0.233639	0.590172	7.05924	0.00106138	0.0109357	0.344928	0.505599	1	2.58128	8.89839e-05	0.000718129	Enriched GUL-1-GFP	Enriched GUL-1-GFP
NCU03998	Q7RZK0	adaptor protein complex 3 Mu3A	0.741533	0.420304	0.751758	5.93918	0.010526	0.0407395	2.01269	0.0250017	1	6.11354	0.000294327	0.00176843	Enriched GUL-1-GFP	Enriched GUL-1-GFP
NCU08055	Q7SGM8	b-ZIP transcription factor IDI4	0.748568	0.291402	0.648543	3.85186	0.000111334	0.00221052	0.502098	0.429567	1	3.21856	2.79372e-05	0.000282723	Enriched GUL-1-GFP	Enriched GUL-1-GFP
NCU00406	Q7RYQ4	protein kise CHM1	0.748954	0.253403	0.611373	6.98324	0.00138025	0.0132938	0.781334	0.172357	1	2.65942	0.000504878	0.00270747	Enriched GUL-1-GFP	Enriched GUL-1-GFP
NCU03045	Q7SD26	cellular morphogenesis protein	0.749431	0.140626	0.481449	3.519	5.88721e-08	2.03137e-06	0.531483	0.229167	1	5.21622	5.09436e-24	5.51537e-22	Enriched GUL-1-GFP	Enriched GUL-1-GFP
NCU02767	Q7SE27	PRO41 protein	0.749536	0.485164	0.793599	3.62812	0.0129964	0.0448335	0.10856	0.910958	1	5.92322	2.52369e-06	3.83093e-05	Enriched GUL-1-GFP	Enriched GUL-1-GFP
NCU05544	V5IN44	dolichyl-phosphate mannosyltransferase polypeptide 3	0.750128	0.299091	0.657944	9.0464	3.51626e-05	0.000785962	-0.748457	0.201717	1	9.41912	2.02946e-09	6.2273e-08	Enriched GUL-1-GFP	Enriched GUL-1-GFP
NCU00938	Q7SFA9	hypothetical protein	0.753387	0.381427	0.719925	18.2812	2.40117e-15	3.06473e-13	0.0474026	0.950709	1	24.751	2.76022e-49	1.75979e-46	Enriched GUL-1-GFP	Enriched GUL-1-GFP
NCU01498	Q1K5L2	serine/threonine-protein kise MAK	0.754014	0.103806	0.413849	5.16691	8.87944e-16	1.50274e-13	0.358564	0.383631	1	6.08787	2.57525e-35	4.7667e-33	Enriched GUL-1-GFP	Enriched GUL-1-GFP
NCU07839	Q7SBC6	ATP-dependent R helicase dbp-2	0.758647	0.340438	0.695385	6.3092	0.00490406	0.0289039	0.910806	0.192466	1	6.86354	2.26368e-05	0.000241431	Enriched GUL-1-GFP	Enriched GUL-1-GFP
NCU05882	Q7S526	cellulase	0.758667	0.265796	0.619655	6.02987	0.00600783	0.0320598	0.213361	0.71697	1	3.11061	0.000607477	0.003129	Enriched GUL-1-GFP	Enriched GUL-1-GFP
NCU02761	Q7SCM2	hypothetical protein	0.761963	0.468223	0.783958	9.11433	0.000119171	0.00233997	-0.0814881	0.925252	1	8.53071	7.98948e-07	1.44162e-05	Enriched GUL-1-GFP	Enriched GUL-1-GFP
NCU08377	Q01631	adenylate cyclase	0.762922	0.232104	0.590172	2.83246	0.00765263	0.0354338	0.555366	0.329516	1	2.37746	0.000790084	0.00382999	Enriched GUL-1-GFP	Enriched GUL-1-GFP
NCU03112	Q7SFY2	DH-cytochrome b5 reductase 2	0.769929	0.278115	0.634869	6.2141	0.00499496	0.0292939	0.861794	0.183921	1	1.45642	0.0679649	0.115482	Enriched GUL-1-GFP
NCU02994	Q1K941	hypothetical protein	0.77231	0.231665	0.590172	5.48912	0.0113192	0.0420566	0.579403	0.337406	1	5.45237	0.000458558	0.00250133	Enriched GUL-1-GFP	Enriched GUL-1-GFP
NCU01216	Q7RVX0	ubiquitin ligase complex F-box protein GRR1	0.772489	0.361229	0.706738	5.94754	0.00916631	0.0385527	0.673997	0.361828	1	1.42729	0.110954	0.170731	Enriched GUL-1-GFP
NCU04521	Q7RY42	hypothetical protein	0.774011	0.209592	0.565321	4.83437	6.09674e-06	0.000153673	0.933636	0.0642279	1	7.00429	1.07565e-09	3.48706e-08	Enriched GUL-1-GFP	Enriched GUL-1-GFP
NCU11308	A7UWP1	hypothetical protein	0.774541	0.397037	0.732378	7.62218	0.000741189	0.00872247	0.838665	0.271894	1	3.46376	8.49698e-05	0.000693983	Enriched GUL-1-GFP	Enriched GUL-1-GFP
NCU06132	Q7S5F6	siderophore iron transporter	0.780958	0.128575	0.458918	1.96986	0.00450788	0.0274333	-0.180993	0.703762	1	3.10331	1.72995e-08	4.70449e-07	Enriched GUL-1-GFP	Enriched GUL-1-GFP
NCU05077	Q7RWK7	metal homeostatis protein bsd2	0.781864	0.264504	0.619655	4.01551	5.60696e-05	0.00119324	0.0978031	0.877099	1	3.42011	3.79815e-06	5.43485e-05	Enriched GUL-1-GFP	Enriched GUL-1-GFP
NCU06981	V5IMM2	hypothetical protein, variant	0.782976	0.155486	0.500827	7.48854	0.000484282	0.00647044	0.306151	0.520833	1	8.0019	1.88694e-07	3.89469e-06	Enriched GUL-1-GFP	Enriched GUL-1-GFP
NCU00670	P42117	DH:ubiquinone oxidoreductase 9.5kD subunit	0.788016	0.456742	0.775291	6.02118	0.0135377	0.0457347	-0.793024	0.403882	1	-0.0169836	0.987902	0.995361	Enriched GUL-1-GFP
NCU07550	Q7S2Z9	triosephosphate isomerase	0.79385	0.0867387	0.377696	8.0468	0.000145594	0.00268104	0.432493	0.301084	1	0.73569	0.127513	0.191037	Enriched GUL-1-GFP
NCU11180	P0C584	patatin-like phospholipase domain-containing protein	0.796106	0.23928	0.596226	5.64963	0.00953068	0.0393404	0.580695	0.3105	1	0.82464	0.251833	0.333718	Enriched GUL-1-GFP
NCU03893	Q7RZD4	short-chain dehydrogese/reductase SDR	0.796728	0.144488	0.485765	2.02575	0.00822323	0.0367844	0.207146	0.668156	1	1.93884	0.000817446	0.00392183	Enriched GUL-1-GFP	Enriched GUL-1-GFP
NCU01634	#N/A	histone h4	0.799177	0.216969	0.574865	2.1912	0.0130975	0.0450521	-0.225131	0.701712	1	1.58173	0.0202534	0.0454637	Enriched GUL-1-GFP	Enriched GUL-1-GFP
NCU03695	Q1K800	phosphatidylserine decarboxylase proenzyme 1	0.80034	0.261095	0.619655	5.56024	0.0112607	0.0420566	0.245921	0.678888	1	0.224427	0.760133	0.816176	Enriched GUL-1-GFP
NCU03753	P22151	clock controlled protein CCG-1	0.80138	0.436488	0.763809	8.25891	0.000824945	0.00938225	0.0974638	0.921294	1	5.97567	0.00100296	0.00458198	Enriched GUL-1-GFP	Enriched GUL-1-GFP
NCU02264	V5IKN3	prefoldin subunit 3, variant	0.803072	0.420259	0.751758	18.8574	4.11516e-15	4.71783e-13	-0.850423	0.346216	1	0.586442	0.59594	0.673661	Enriched GUL-1-GFP
NCU04143	Q1K7L4	protein kise	0.804907	0.150425	0.493552	7.35871	0.000590815	0.00739351	0.340763	0.47638	1	1.93866	0.00116282	0.00508558	Enriched GUL-1-GFP	Enriched GUL-1-GFP
NCU03387	Q1K5G2	vesicular-fusion protein SEC18	0.810693	0.239229	0.596226	6.96421	0.00146805	0.0138762	-0.580055	0.341016	1	1.7256	0.0132268	0.0330122	Enriched GUL-1-GFP	Enriched GUL-1-GFP
NCU05878	Q7S530	hypothetical protein	0.8116	0.13525	0.47159	3.58016	7.53903e-07	2.25157e-05	0.146034	0.755977	1	3.93884	1.94004e-13	9.19994e-12	Enriched GUL-1-GFP	Enriched GUL-1-GFP
NCU09118	V5IPM9	D topoisomerase I, variant	0.813094	0.207424	0.565321	6.56601	0.00247707	0.019391	0.939668	0.0838322	1	3.02739	0.000268089	0.00165408	Enriched GUL-1-GFP	Enriched GUL-1-GFP
NCU00515	V5IQL6	hypothetical protein, variant 1	0.813163	0.190434	0.546623	2.63739	0.0025871	0.0200822	0.456397	0.402491	1	3.46353	2.51155e-07	5.02135e-06	Enriched GUL-1-GFP	Enriched GUL-1-GFP
NCU09252	Q7SF58	hypothetical protein	0.813205	0.230477	0.590095	2.71465	0.00391945	0.0255766	0.66831	0.246059	1	3.59065	1.78298e-06	2.87381e-05	Enriched GUL-1-GFP	Enriched GUL-1-GFP
NCU08027	Q7SAL4	nucleoside diphosphatase	0.815848	0.185993	0.541955	3.25455	0.000746321	0.00873536	-0.0102654	0.984367	1	2.96613	8.59466e-06	0.000107677	Enriched GUL-1-GFP	Enriched GUL-1-GFP
NCU11222	A7UW23	hypothetical protein	0.815889	0.377247	0.718728	5.68638	0.014944	0.0479775	0.214939	0.79156	1	-0.358843	0.706919	0.772041	Enriched GUL-1-GFP
NCU09253	Q7SF57	DUF907 domain-containing protein	0.817454	0.145242	0.487523	3.30743	8.20091e-06	0.000201007	-0.028031	0.955825	1	4.6142	4.37124e-15	2.36624e-13	Enriched GUL-1-GFP	Enriched GUL-1-GFP
NCU06703	Q7S7M6	calcium channel subunit Mid1	0.818293	0.26501	0.619655	5.71742	0.00986861	0.0397653	0.506943	0.415223	1	5.50474	0.000572939	0.00299957	Enriched GUL-1-GFP	Enriched GUL-1-GFP
NCU00655	V5IR42	mitochondrial enoyl reductase, variant	0.819425	0.132771	0.466797	6.10261	0.0042533	0.0264395	-0.634889	0.211745	1	0.215325	0.708699	0.773396	Enriched GUL-1-GFP
NCU00566	Q7SF83	syptobrevin	0.819484	0.316492	0.673891	5.55255	0.0144618	0.0470548	-0.278921	0.697011	1	0.729263	0.44977	0.535988	Enriched GUL-1-GFP
NCU06404	Q7RVG3	GTP-binding protein	0.820213	0.244012	0.601281	6.18137	0.00507754	0.0294905	-0.10179	0.867177	1	0.61957	0.397309	0.485572	Enriched GUL-1-GFP
NCU02809	Q7SEK5	hypothetical protein	0.820277	0.264488	0.619655	6.2931	0.00455427	0.0274803	0.29547	0.642956	1	6.13099	0.000126832	0.00094148	Enriched GUL-1-GFP	Enriched GUL-1-GFP
NCU00356	Q7RZL0	nucleoside transporter	0.823338	0.24725	0.606084	7.25327	0.000962908	0.0103389	-0.203165	0.729785	1	3.09487	5.51154e-05	0.000491075	Enriched GUL-1-GFP	Enriched GUL-1-GFP
NCU08620	Q7SFJ9	40S ribosomal protein S16	0.829482	0.164127	0.513981	7.24322	0.000825089	0.00938225	-0.258727	0.617549	1	3.34734	1.36216e-05	0.00015601	Enriched GUL-1-GFP	Enriched GUL-1-GFP
NCU09335	Q7S132	hypothetical protein	0.83181	0.153086	0.496883	7.11504	0.000938403	0.0102303	0.61416	0.215708	1	1.05574	0.0934882	0.148844	Enriched GUL-1-GFP
NCU04456	Q7RWB0	hypothetical protein	0.833332	0.329445	0.68641	4.97242	5.72537e-05	0.00121119	-0.176052	0.814812	1	9.24101	1.99471e-08	5.34843e-07	Enriched GUL-1-GFP	Enriched GUL-1-GFP
NCU07439	Q7SF14	hypothetical protein	0.834219	0.25665	0.614394	7.14701	0.00142861	0.0135756	-0.0344123	0.958526	1	-0.224515	0.765968	0.821212	Enriched GUL-1-GFP
NCU10853	V5IM78	serine/threonine protein kise-57, variant 1	0.837685	0.240857	0.596608	7.32284	0.00100245	0.0105719	0.0909958	0.885527	1	1.51897	0.042775	0.0801315	Enriched GUL-1-GFP
NCU06923	Q7S3D0	methionine aminopeptidase 1	0.839755	0.333072	0.69064	5.99359	0.00903243	0.038307	0.124853	0.870087	1	0.959453	0.295755	0.38093	Enriched GUL-1-GFP
NCU06688	Q1K747	F-box domain-containing protein	0.843521	0.231801	0.590172	5.58354	0.010544	0.0407395	1.03421	0.0854721	1	2.23009	0.0123322	0.0311728	Enriched GUL-1-GFP	Enriched GUL-1-GFP
NCU02079	Q7SEY5	cyclin-dependent kise regulatory subunit	0.845787	0.384832	0.72363	5.92659	0.0113616	0.0420566	0.0244783	0.976552	1	0.507036	0.612977	0.689524	Enriched GUL-1-GFP
NCU02010	Q7SFM2	2-isopropylmalate synthase	0.84654	0.430771	0.759631	6.09382	0.0127629	0.0445574	0.0070095	0.994378	1	1.90779	0.0927707	0.147891	Enriched GUL-1-GFP
NCU02713	Q7SH16	conidial separation-1	0.8467	0.391484	0.727214	5.39982	0.00016064	0.00288341	0.0328885	0.971618	1	3.52881	0.000923819	0.00429568	Enriched GUL-1-GFP	Enriched GUL-1-GFP
NCU05136	Q1K5A3	endo alpha-1,4 polygalactosaminidase precursor	0.848374	0.10874	0.419669	2.72196	0.000320195	0.00470237	0.685204	0.154516	1	3.30416	1.20196e-08	3.348e-07	Enriched GUL-1-GFP	Enriched GUL-1-GFP
NCU06772	Q1K8Z7	hypothetical protein	0.853708	0.254925	0.612576	6.3392	0.0033189	0.0235063	-0.25226	0.685616	1	3.94392	8.24465e-05	0.000677762	Enriched GUL-1-GFP	Enriched GUL-1-GFP
NCU01792	F5HII2	heat shock protein 90-associated	0.854756	0.16184	0.510472	2.56914	0.0119886	0.0432124	-0.105569	0.84226	1	3.88948	2.49463e-05	0.000260732	Enriched GUL-1-GFP	Enriched GUL-1-GFP
NCU03290	V5IQR9	dipeptidyl peptidase	0.860805	0.312598	0.669464	18.9295	2.59752e-16	5.76975e-14	-0.220027	0.776253	1	1.37747	0.14623	0.213231	Enriched GUL-1-GFP
NCU00814	Q7SEC0	hypothetical protein	0.861662	0.436015	0.763296	5.96491	0.0159505	0.0494228	0.130689	0.896204	1	4.78519	0.00867539	0.0237838	Enriched GUL-1-GFP	Enriched GUL-1-GFP
NCU04830	Q7S6K5	hypothetical protein	0.862505	0.356329	0.703064	7.28291	0.00192388	0.0166251	0.237998	0.77478	1	2.70268	0.0211115	0.0467893	Enriched GUL-1-GFP	Enriched GUL-1-GFP
NCU06454	B2ZAG5	rho-type GTPase, variant	0.865378	0.112399	0.428697	2.00978	0.0070026	0.0341858	0.326359	0.479989	1	2.64591	2.04172e-06	3.20092e-05	Enriched GUL-1-GFP	Enriched GUL-1-GFP
NCU04431	Q7RZ43	endo-1,3(4)-beta-glucase	0.865596	0.518379	0.818509	7.44973	0.00400345	0.0258253	0.0136005	0.990635	1	6.35657	0.000910656	0.00424825	Enriched GUL-1-GFP	Enriched GUL-1-GFP
NCU03135	Q7SDV5	hypothetical protein	0.867128	0.26478	0.619655	5.84423	0.00858819	0.0374049	0.287349	0.663026	1	0.665655	0.392555	0.480683	Enriched GUL-1-GFP
NCU09696	Q1K6J6	sigl recognition particle protein	0.867408	0.265056	0.619655	5.36579	0.0157728	0.0492246	0.74068	0.277745	1	1.17575	0.165731	0.237267	Enriched GUL-1-GFP
NCU01414	Q1K6U0	ascospore maturation 1 protein	0.868564	0.136033	0.472201	4.35329	1.05238e-06	3.09103e-05	0.263288	0.610368	1	5.23481	1.39163e-13	6.71023e-12	Enriched GUL-1-GFP	Enriched GUL-1-GFP
NCU00068	U9W307	hypothetical protein	0.868952	0.111029	0.424886	4.06618	2.91229e-06	8.02347e-05	0.169259	0.727157	1	3.35616	1.24162e-09	3.95802e-08	Enriched GUL-1-GFP	Enriched GUL-1-GFP
NCU05303	Q7S8Z7	hypothetical protein	0.869858	0.422214	0.753485	6.055	0.012819	0.0446274	1.19145	0.217336	1	4.95002	0.00560306	0.0169928	Enriched GUL-1-GFP	Enriched GUL-1-GFP
NCU02668	Q7SH61	cell wall synthesis protein-Penicillium chrysogenum	0.874201	0.145805	0.487593	6.46812	6.67977e-16	1.24947e-13	0.356048	0.524438	1	7.83187	2.83268e-35	5.07935e-33	Enriched GUL-1-GFP	Enriched GUL-1-GFP
NCU02771	Q7SE23	uroporphyrinogen decarboxylase	0.879366	0.310746	0.667258	6.24663	0.00645932	0.032936	0.762905	0.313015	1	6.29385	0.000156062	0.00110108	Enriched GUL-1-GFP	Enriched GUL-1-GFP
NCU08618	Q7SFK1	ADP-ribosylation factor family protein	0.880247	0.324127	0.681812	6.38639	0.00516104	0.0295055	0.111291	0.883604	1	6.28961	0.000145686	0.00105107	Enriched GUL-1-GFP	Enriched GUL-1-GFP
NCU08930	P19968	DH:ubiquinone oxidoreductase 21.3kD subunit A	0.882357	0.281469	0.637635	6.20185	0.00618406	0.0322932	0.717199	0.325277	1	1.7647	0.0508783	0.0913529	Enriched GUL-1-GFP
NCU10529	V5IQC9	hypothetical protein	0.885305	0.223905	0.584088	6.53044	0.00329399	0.0235063	0.661511	0.292369	1	2.13111	0.0104266	0.0274062	Enriched GUL-1-GFP	Enriched GUL-1-GFP
NCU07110	Q7S665	hypothetical protein	0.885341	0.198899	0.558133	3.77632	0.000253996	0.00398239	0.414393	0.450111	1	3.55574	2.19908e-07	4.45878e-06	Enriched GUL-1-GFP	Enriched GUL-1-GFP
NCU06135	Q7S5F3	hypothetical protein	0.887848	0.247252	0.606084	5.70728	0.0103708	0.0405401	0.977096	0.145009	1	-0.162969	0.83284	0.874123	Enriched GUL-1-GFP
NCU09321	Q7SDF0	sucrose transporter	0.889135	0.256366	0.614394	7.75679	0.000513071	0.00675354	-0.258903	0.698051	1	8.39332	1.89566e-07	3.89868e-06	Enriched GUL-1-GFP	Enriched GUL-1-GFP
NCU00941	Q7SFA6	hypothetical protein	0.889665	0.287781	0.644153	5.5069	0.0142814	0.0466938	0.402561	0.560213	1	6.34158	9.41247e-05	0.000748043	Enriched GUL-1-GFP	Enriched GUL-1-GFP
NCU06630	P48580	serine/threonine-protein phosphatase PP2A catalytic subunit	0.889813	0.351091	0.701119	6.11321	0.00939738	0.039036	0.0662332	0.937431	1	2.52353	0.0322495	0.0643046	Enriched GUL-1-GFP
NCU00488	A7UVV2	protein phosphatase PP2A regulatory subunit A	0.890896	0.216859	0.574865	6.37018	0.00408917	0.025998	0.669565	0.293076	1	2.86393	0.00161007	0.0064696	Enriched GUL-1-GFP	Enriched GUL-1-GFP
NCU00010	Q7RY95	heavy metal tolerance protein	0.893039	0.208775	0.565321	2.85071	0.00508975	0.0294905	0.195944	0.755744	1	5.69714	1.37256e-08	3.8047e-07	Enriched GUL-1-GFP	Enriched GUL-1-GFP
NCU03770	Q1K7A8	cell wall glycosyl hydrolase Dfg5	0.89424	0.259386	0.618953	7.50058	0.000850174	0.00958251	0.0888904	0.897144	1	7.90754	1.13383e-06	1.94206e-05	Enriched GUL-1-GFP	Enriched GUL-1-GFP
NCU03937	Q7RZC0	intermediate filament protein	0.895168	0.251957	0.608789	5.49681	0.0137773	0.0460463	0.0647941	0.922172	1	0.81039	0.311561	0.396922	Enriched GUL-1-GFP
NCU00486	Q7RWU1	hypothetical protein	0.89523	0.321703	0.680821	6.21493	0.00777228	0.0358013	0.447803	0.578867	1	3.01559	0.00879713	0.0240715	Enriched GUL-1-GFP	Enriched GUL-1-GFP
NCU03610	Q1K7R7	NEDD8-conjugating enzyme UBC12	0.900025	0.326629	0.68503	5.89589	0.010781	0.0411456	-0.0234702	0.97684	1	5.96639	0.000385812	0.00219476	Enriched GUL-1-GFP	Enriched GUL-1-GFP
NCU08131	Q7S4K0	alpha-amylase	0.901093	0.0616008	0.320203	4.09649	1.08288e-10	5.83115e-09	0.104519	0.804629	1	4.85113	2.60285e-23	2.6202e-21	Enriched GUL-1-GFP	Enriched GUL-1-GFP
NCU03257	Q7SEH0	ammonium transporter MEP1	0.901739	0.312246	0.669144	17.761	2.50742e-14	2.40848e-12	0.478817	0.550539	1	24.7226	4.0207e-48	2.09734e-45	Enriched GUL-1-GFP	Enriched GUL-1-GFP
NCU08535	Q7SBL5	acetyl-CoA carboxylase	0.902208	0.456613	0.775291	7.1502	0.00556494	0.0308546	0.680255	0.571426	1	2.36351	0.0725099	0.121697	Enriched GUL-1-GFP
NCU05592	Q7S6X1	ubiquitin-conjugating enzyme	0.903304	0.258798	0.618472	5.69095	7.62749e-08	2.58172e-06	0.562254	0.398293	1	7.30321	1.75792e-18	1.26165e-16	Enriched GUL-1-GFP	Enriched GUL-1-GFP
NCU04058	Q7RZF9	hypothetical protein	0.903941	0.276236	0.632919	6.1985	0.0064229	0.0328446	0.119673	0.867675	1	6.04252	0.000246494	0.00155889	Enriched GUL-1-GFP	Enriched GUL-1-GFP
NCU03504	Q1K4N4	sphingosine-1-phosphate phosphohydrolase	0.90649	0.252356	0.609404	5.91393	0.00725762	0.0347224	1.88439	0.00700247	1	6.5002	4.12622e-05	0.000391991	Enriched GUL-1-GFP	Enriched GUL-1-GFP
NCU05926	Q7S0P7	hypothetical protein	0.909001	0.200902	0.560775	5.87273	0.00780857	0.0358013	-0.602475	0.348317	1	1.15502	0.130977	0.195227	Enriched GUL-1-GFP
NCU08868	V5ILS2	hypothetical protein	0.910241	0.241539	0.597394	5.75403	0.00899631	0.0382212	1.19317	0.0575828	1	3.44808	0.00456187	0.0144779	Enriched GUL-1-GFP	Enriched GUL-1-GFP
NCU04373	Q7RWQ7	hypothetical protein	0.911698	0.0703294	0.344394	7.54827	7.64809e-28	1.35907e-24	0.72288	0.10962	1	8.13593	2.11942e-51	1.73732e-48	Enriched GUL-1-GFP	Enriched GUL-1-GFP
NCU09449	Q7S0G4	hypothetical protein	0.917239	0.266567	0.619655	6.66381	0.00335493	0.0235063	1.14143	0.120207	1	7.18879	1.24277e-05	0.000145234	Enriched GUL-1-GFP	Enriched GUL-1-GFP
NCU00553	Q7SF96	rho GTPase activator	0.918037	0.327988	0.685922	6.78997	0.00389139	0.0254696	0.0203823	0.980522	1	7.14704	3.05363e-05	0.00030367	Enriched GUL-1-GFP	Enriched GUL-1-GFP
NCU07747	Q7S1T1	hypothetical protein	0.918286	0.21536	0.573841	7.18034	0.00103141	0.0108129	-0.0485735	0.938161	1	7.64667	1.15405e-06	1.97082e-05	Enriched GUL-1-GFP	Enriched GUL-1-GFP
NCU07178	Q1K5W0	hypothetical protein	0.91858	0.265564	0.619655	4.82437	0.00017357	0.00305764	0.0309369	0.967472	1	2.79587	0.00205954	0.00792066	Enriched GUL-1-GFP	Enriched GUL-1-GFP
NCU03635	Q9C2B9	60S ribosomal protein L38	0.918635	0.146186	0.487593	5.52612	0.0105689	0.0407395	-0.458883	0.367116	1	5.73884	0.000214137	0.00138682	Enriched GUL-1-GFP	Enriched GUL-1-GFP
NCU03633	Q1K7Q1	mevalote kise	0.919069	0.157053	0.503849	6.20178	0.00415693	0.0261013	0.688384	0.201297	1	1.63559	0.0130439	0.0326696	Enriched GUL-1-GFP	Enriched GUL-1-GFP
NCU04175	Q1K7F0	hypothetical protein	0.919181	0.175732	0.531219	6.59977	0.00250035	0.0195302	0.186969	0.744078	1	3.22068	0.00015625	0.00110108	Enriched GUL-1-GFP	Enriched GUL-1-GFP
NCU00573	Q7SF77	hypothetical protein	0.922773	0.0867825	0.377696	3.30717	0.000327288	0.00474768	0.85575	0.0700347	1	2.06065	0.000239557	0.00152901	Enriched GUL-1-GFP	Enriched GUL-1-GFP
NCU03488	P05035	orotidine-5'-phosphate decarboxylase Pyr-4	0.922876	0.0964417	0.400112	2.05776	0.0159158	0.0494228	0.396362	0.421828	1	1.95131	0.00304528	0.0106159	Enriched GUL-1-GFP	Enriched GUL-1-GFP
NCU07945	V5IN36	fungal specific transcription factor, variant	0.926411	0.323596	0.681759	6.16847	0.00877364	0.03775	0.621435	0.461752	1	0.60714	0.534845	0.617493	Enriched GUL-1-GFP
NCU01606	Q9P602	ATP synthase subunit 5	0.926474	0.168477	0.521527	5.83575	0.00740349	0.0348868	0.588981	0.298367	1	1.4149	0.0750831	0.125059	Enriched GUL-1-GFP
NCU03647	Q7RVV5	hypothetical protein	0.930357	0.249724	0.606883	6.31758	0.00536117	0.0301143	0.604735	0.404122	1	0.588663	0.478829	0.564985	Enriched GUL-1-GFP
NCU01659	V5INL8	dDENN domain-containing protein	0.930798	0.20879	0.565321	7.43906	0.000874113	0.00979999	0.331654	0.617821	1	2.84806	0.000625769	0.00320033	Enriched GUL-1-GFP	Enriched GUL-1-GFP
NCU06039	Q7S4E6	WD repeat protein	0.932247	0.374466	0.717034	6.44612	0.00695115	0.0340281	0.0388081	0.969806	1	4.05097	0.000866466	0.00409164	Enriched GUL-1-GFP	Enriched GUL-1-GFP
NCU02114	Q7SDM0	G1/S-specific cyclin Cln1	0.934103	0.062645	0.322851	3.90985	5.22268e-09	2.1837e-07	0.0669874	0.878818	1	5.01347	1.94303e-22	1.82772e-20	Enriched GUL-1-GFP	Enriched GUL-1-GFP
NCU08878	Q7S789	TEM1	0.941904	0.348579	0.698929	7.39534	0.00207485	0.0170695	0.7217	0.42404	1	3.00758	0.00963561	0.0257674	Enriched GUL-1-GFP	Enriched GUL-1-GFP
NCU06255	Q7SB58	hypothetical protein	0.942111	0.475608	0.788512	7.58544	0.00439945	0.0269116	0.648677	0.597781	1	5.35235	0.00690688	0.020087	Enriched GUL-1-GFP	Enriched GUL-1-GFP
NCU04274	Q9C224	nuclear envelope protein Cut8	0.942652	0.162911	0.512249	3.56165	0.000265706	0.00407034	0.142657	0.805402	1	2.9404	3.55387e-05	0.000345044	Enriched GUL-1-GFP	Enriched GUL-1-GFP
NCU08141	Q7S3Y9	hypothetical protein	0.942742	0.391952	0.727401	6.63255	0.00701846	0.0342162	1.35863	0.175329	1	6.0532	0.000812459	0.00390443	Enriched GUL-1-GFP	Enriched GUL-1-GFP
NCU00719	Q7SES7	hypothetical protein	0.946491	0.140022	0.480585	4.08374	5.00941e-06	0.000131877	0.726353	0.211	1	4.00757	9.01374e-10	2.97246e-08	Enriched GUL-1-GFP	Enriched GUL-1-GFP
NCU09120	Q7S2M8	lysine-specific histone demethylase Aof2	0.948255	0.188657	0.544912	5.95637	0.00694109	0.0340281	0.087566	0.885334	1	1.1725	0.118181	0.179255	Enriched GUL-1-GFP
NCU05996	Q7S2G0	C6 finger domain-containing protein	0.948946	0.0409227	0.259982	2.25043	0.000216488	0.0035786	-0.0198441	0.962275	1	3.94334	1.20321e-15	6.70295e-14	Enriched GUL-1-GFP	Enriched GUL-1-GFP
NCU02009	Q7SFM3	FreB protein	0.949448	0.094748	0.396213	4.14738	1.09237e-08	4.08662e-07	0.486369	0.325501	1	5.19794	2.37846e-20	1.97792e-18	Enriched GUL-1-GFP	Enriched GUL-1-GFP
NCU07859	Q7SBV0	cyclopropane-fatty-acyl-phospholipid synthase	0.950217	0.232603	0.590172	19.4537	9.24751e-18	2.7388e-15	0.309506	0.661752	1	2.34336	0.00672054	0.0196647	Enriched GUL-1-GFP	Enriched GUL-1-GFP
NCU08560	Q7SAV1	hypothetical protein	0.95146	0.307434	0.667039	6.80627	0.00300559	0.0222539	0.478178	0.536605	1	7.34322	1.01943e-05	0.000124375	Enriched GUL-1-GFP	Enriched GUL-1-GFP
NCU08052	Q7SGN1	aquaporin	0.952529	0.322728	0.681635	18.7389	3.5865e-15	4.24881e-13	0.505856	0.564959	1	24.2539	8.16893e-44	2.75726e-41	Enriched GUL-1-GFP	Enriched GUL-1-GFP
NCU02661	Q7SH68	D-directed R polymerase II polypeptide	0.952592	0.310382	0.667258	5.98285	0.0105087	0.0407395	0.493698	0.551512	1	6.35801	0.00018821	0.00125576	Enriched GUL-1-GFP	Enriched GUL-1-GFP
NCU09377	V5IPN6	protein phosphatase PP2A regulatory subunit B, variant	0.953292	0.135148	0.47159	2.29893	0.0144424	0.0470548	0.155888	0.782324	1	1.38357	0.0437359	0.0816651	Enriched GUL-1-GFP
NCU00916	V5IPZ3	membrane bound cation transporter, variant 2	0.956744	0.152929	0.496755	7.22626	0.000989224	0.0105261	-0.0978406	0.864979	1	7.35099	3.1803e-06	4.64341e-05	Enriched GUL-1-GFP	Enriched GUL-1-GFP
NCU00444	Q7RXR5	transcription initiation factor TFIID subunit 14	0.957739	0.440051	0.765291	6.21284	0.0158979	0.0494228	0.592444	0.598524	1	1.74739	0.199186	0.275671	Enriched GUL-1-GFP
NCU08962	Q7S7F2	hypothetical protein	0.959727	0.227551	0.587937	5.9197	0.00824906	0.0367844	0.621365	0.368688	1	1.4489	0.082758	0.135366	Enriched GUL-1-GFP
NCU02420	V5IKK6	AAA family ATPase, variant	0.962206	0.281311	0.637635	5.68457	0.0133813	0.0455092	0.504079	0.508517	1	5.72094	0.000608362	0.00313075	Enriched GUL-1-GFP	Enriched GUL-1-GFP
NCU08298	Q7SA89	cytosolic phospholipase A2 zeta	0.968908	0.200661	0.560775	6.00702	0.00721634	0.0347224	0.546527	0.412778	1	0.903623	0.271234	0.354884	Enriched GUL-1-GFP
NCU00571	Q7SF79	hypothetical protein	0.972271	0.201194	0.560775	5.7329	0.00979542	0.0396052	0.311737	0.620919	1	5.46133	0.000650491	0.00328566	Enriched GUL-1-GFP	Enriched GUL-1-GFP
NCU08909	Q1K677	beta-1,3-glucanosyltransferase	0.972991	0.0492671	0.28797	4.14773	6.7506e-10	3.42737e-08	0.386715	0.402508	1	4.82354	3.7957e-20	3.11139e-18	Enriched GUL-1-GFP	Enriched GUL-1-GFP
NCU01238	Q1K818	PHD transcription factor	0.973491	0.0826801	0.370818	1.87188	0.0145736	0.0471718	0.14694	0.762309	1	1.71844	0.00217746	0.00825767	Enriched GUL-1-GFP	Enriched GUL-1-GFP
NCU02057	V5IQ32	autoinducer 2 sensor kise/phosphatase luxQ	0.976894	0.126358	0.455793	8.08544	0.000199158	0.00337051	0.237386	0.661875	1	3.04811	4.95627e-06	6.90269e-05	Enriched GUL-1-GFP	Enriched GUL-1-GFP
NCU00499	Q7SE74	all development altered-1	0.978747	0.035737	0.241745	2.60297	3.27049e-05	0.000740338	0.207964	0.620138	1	3.41561	6.36125e-12	2.58871e-10	Enriched GUL-1-GFP	Enriched GUL-1-GFP
NCU02696	Q7SH33	pre-mR-processing ATP-dependent R helicase prp-5	0.980645	0.120105	0.446013	5.9624	0.00596056	0.0318861	0.7943	0.143108	1	6.57548	2.35692e-05	0.000249496	Enriched GUL-1-GFP	Enriched GUL-1-GFP
NCU02932	Q7SHH2	hypothetical protein	0.983068	0.113015	0.429676	2.30856	0.0122643	0.0438904	0.333457	0.542949	1	6.3702	4.79604e-05	0.000443151	Enriched GUL-1-GFP	Enriched GUL-1-GFP
NCU09265	Q7SF45	calreticulin	0.984131	0.0874144	0.380055	2.23207	0.00408282	0.025998	0.152719	0.760874	1	4.81578	3.41027e-11	1.2959e-09	Enriched GUL-1-GFP	Enriched GUL-1-GFP
NCU02764	Q7SE30	Round spore	0.98554	0.117168	0.438188	2.18089	0.0129334	0.0448004	0.429687	0.395181	1	7.30696	2.15875e-06	3.33879e-05	Enriched GUL-1-GFP	Enriched GUL-1-GFP
NCU04628	Q7S029	hypothetical protein	0.997888	0.192375	0.550052	6.28037	0.00463633	0.0276694	0.569563	0.377708	1	6.75909	2.36104e-05	0.000249496	Enriched GUL-1-GFP	Enriched GUL-1-GFP
NCU07267	Q01358	bli-3	0.999092	0.444572	0.768676	7.58541	0.00435626	0.0267395	0.352575	0.771117	1	1.13092	0.438922	0.525571	Enriched GUL-1-GFP
NCU07971	Q7S914	DUF221 domain-containing protein	0.999173	0.23867	0.595758	2.91244	0.0144136	0.0470395	0.249078	0.740055	1	3.23422	0.00032271	0.00189051	Enriched GUL-1-GFP	Enriched GUL-1-GFP
NCU03370	V5IN05	hypothetical protein	1.00026	0.167672	0.521527	6.31	0.004605	0.0276182	0.752491	0.247502	1	5.49916	0.000630117	0.00321388	Enriched GUL-1-GFP	Enriched GUL-1-GFP
NCU05826	Q7S5L7	hypothetical protein	1.00034	0.204004	0.562375	7.5093	0.00083931	0.0094997	1.2778	0.0900445	1	7.63749	2.60564e-06	3.92419e-05	Enriched GUL-1-GFP	Enriched GUL-1-GFP
NCU07541	Q7S307	hypothetical protein	1.00193	0.237075	0.59382	2.82547	0.00743013	0.0348868	1.59604	0.0174685	1	8.18041	1.75224e-07	3.66947e-06	Enriched GUL-1-GFP	Enriched GUL-1-GFP
NCU07351	Q7S165	alpha-glucuronidase	1.00236	0.0465048	0.279161	1.99099	0.00415788	0.0261013	0.502585	0.261095	1	2.05184	0.000112611	0.000859337	Enriched GUL-1-GFP	Enriched GUL-1-GFP
NCU04185	V5ILY7	protein kise gsk3	1.00949	0.0922641	0.391474	2.38166	0.00319014	0.0231223	0.367411	0.490824	1	3.35953	1.2756e-07	2.79367e-06	Enriched GUL-1-GFP	Enriched GUL-1-GFP
NCU01170	Q1K863	hypothetical protein	1.01008	0.204673	0.56241	5.91043	0.00855952	0.0373683	0.23492	0.73158	1	2.44507	0.0102401	0.0270025	Enriched GUL-1-GFP	Enriched GUL-1-GFP
NCU16683	U9W3A4	hypothetical protein	1.01047	0.449266	0.772314	6.53628	0.0148784	0.0478101	1.07711	0.386403	1	4.67577	0.019412	0.0440087	Enriched GUL-1-GFP	Enriched GUL-1-GFP
NCU02172	Q7SEP5	hypothetical protein	1.01542	0.334563	0.691461	6.5712	0.00635214	0.0327656	0.842138	0.371244	1	6.41071	0.000275724	0.00168668	Enriched GUL-1-GFP	Enriched GUL-1-GFP
NCU08566	O13335	nuclear distribution protein RO11	1.01763	0.0610556	0.318544	3.28148	4.86366e-05	0.00104129	0.856386	0.0697962	1	3.81743	1.04332e-10	3.66415e-09	Enriched GUL-1-GFP	Enriched GUL-1-GFP
NCU03548	Q1K4M0	hypothetical protein	1.0177	0.214096	0.571555	5.94678	0.00875718	0.03775	0.548319	0.46538	1	3.34833	0.00165194	0.00660085	Enriched GUL-1-GFP	Enriched GUL-1-GFP
NCU07489	V5IQF0	serine/threonine-protein phosphatase PP-Z, variant	1.01924	0.0540898	0.301164	1.94954	0.00610312	0.0321818	0.491574	0.273533	1	2.96732	1.32689e-07	2.89495e-06	Enriched GUL-1-GFP	Enriched GUL-1-GFP
NCU11260	A7UWB0	hypothetical protein	1.0218	0.249422	0.606883	3.74154	0.00723545	0.0347224	0.269528	0.734135	1	6.71942	7.18625e-05	0.000608182	Enriched GUL-1-GFP	Enriched GUL-1-GFP
NCU04612	V5ILY0	mitogen activated protein kise kise 2, variant	1.02233	0.214997	0.573235	6.14269	0.0066932	0.0334096	-0.221152	0.756295	1	1.26612	0.167745	0.239612	Enriched GUL-1-GFP
NCU04276	Q1K792	hypothetical protein	1.02418	0.0861539	0.37663	1.99093	0.0119419	0.0431579	-0.4513	0.41208	1	3.3028	1.94282e-07	3.98139e-06	Enriched GUL-1-GFP	Enriched GUL-1-GFP
NCU08477	P33723	small GTP-binding protein	1.02701	0.0691142	0.343013	2.01533	0.0139723	0.0462359	0.0291497	0.953595	1	4.27698	3.54633e-07	6.89792e-06	Enriched GUL-1-GFP	Enriched GUL-1-GFP
NCU02609	V5IP88	hypothetical protein, variant	1.02973	0.186055	0.541955	7.61297	0.000759838	0.00882504	-0.239446	0.729277	1	1.63621	0.0496185	0.08956	Enriched GUL-1-GFP
NCU14174	#N/A		1.03079	0.24084	0.596608	9.87864	1.89524e-05	0.000443137	0.581243	0.450947	1	3.7726	3.9808e-05	0.000380116	Enriched GUL-1-GFP	Enriched GUL-1-GFP
NCU09537	Q7S2C4	rho-GTPase-activating protein 8	1.03134	0.142728	0.484088	7.06089	0.00145079	0.0137496	0.123143	0.842654	1	3.51239	0.000101842	0.000796403	Enriched GUL-1-GFP	Enriched GUL-1-GFP
NCU06402	V5INF4	C-4 methylsterol oxidase, variant	1.03309	0.0988929	0.405799	2.95173	0.000775488	0.00891937	-0.259057	0.664917	1	3.24871	2.18569e-06	3.37137e-05	Enriched GUL-1-GFP	Enriched GUL-1-GFP
NCU06344	Q7S9W2	disulfide isomerase	1.03438	0.200115	0.560406	6.25447	0.00579829	0.0314613	0.311964	0.660129	1	6.49657	7.54746e-05	0.000633148	Enriched GUL-1-GFP	Enriched GUL-1-GFP
NCU06245	Q7SBR2	phospholipase C	1.03664	0.210022	0.565482	5.7487	0.0112475	0.0420566	-0.463053	0.53108	1	-0.191667	0.814966	0.859767	Enriched GUL-1-GFP
NCU01912	V5IP53	mannosyltransferase 1, variant	1.0388	0.0964775	0.400112	2.64812	0.00151005	0.0141229	0.44753	0.428086	1	3.63226	3.11672e-08	7.9838e-07	Enriched GUL-1-GFP	Enriched GUL-1-GFP
NCU06312	Q7SAB9	G-protein-coupled receptor 4 protein	1.0393	0.353996	0.703028	6.20614	0.0126009	0.0443841	-0.0257031	0.979957	1	5.49493	0.00270255	0.00969201	Enriched GUL-1-GFP	Enriched GUL-1-GFP
NCU06655	Q1K6M6	lipid particle protein	1.04301	0.248332	0.606883	6.38105	0.00629383	0.0326068	-0.259325	0.747668	1	3.20354	0.0185733	0.0425955	Enriched GUL-1-GFP	Enriched GUL-1-GFP
NCU09175	Q7S340	GPI-anchored cell wall beta-1,3-endoglucase EglC	1.04654	0.0397985	0.255606	5.60851	2.41453e-15	3.06473e-13	0.229601	0.615284	1	6.00835	3.2284e-29	4.74988e-27	Enriched GUL-1-GFP	Enriched GUL-1-GFP
NCU00223	U9W3A7	bZIP transcription factor	1.04723	0.185716	0.541955	5.74312	0.0109327	0.0414011	0.243777	0.723074	1	5.32158	0.00112982	0.0049967	Enriched GUL-1-GFP	Enriched GUL-1-GFP
NCU08270	Q7S8J7	dicer-like protein 1	1.04798	0.0803466	0.365495	2.38209	0.0145661	0.0471718	0.221504	0.639889	1	2.67909	3.36156e-05	0.000330285	Enriched GUL-1-GFP	Enriched GUL-1-GFP
NCU07952	Q7S932	C2H2 type zinc finger domain-containing protein	1.04884	0.112869	0.429676	7.41942	0.000714759	0.00849583	0.0543486	0.924691	1	2.42267	0.00127317	0.00543562	Enriched GUL-1-GFP	Enriched GUL-1-GFP
NCU02160	B2ZAG4	small GTPase RAC	1.05506	0.148945	0.49266	2.83604	0.00619459	0.0322932	-0.304933	0.637875	1	3.43743	8.78116e-05	0.000710667	Enriched GUL-1-GFP	Enriched GUL-1-GFP
NCU03515	Q1K4P2	cell division control protein 10	1.05771	0.0632154	0.324998	1.93752	0.0052145	0.0296981	0.506374	0.282087	1	4.11712	5.88876e-11	2.17106e-09	Enriched GUL-1-GFP	Enriched GUL-1-GFP
NCU03364	V5IP79	DENN domain-containing protein, variant	1.05807	0.053912	0.30057	3.39384	5.63641e-06	0.000144114	0.416213	0.395982	1	4.3505	3.91423e-14	1.95303e-12	Enriched GUL-1-GFP	Enriched GUL-1-GFP
NCU08859	V5ILS5	hypothetical protein	1.05862	0.0797288	0.365361	2.41908	0.00556314	0.0308546	0.352379	0.500846	1	2.00315	0.00125894	0.00541163	Enriched GUL-1-GFP	Enriched GUL-1-GFP
NCU07553	Q7RZZ8	hypothetical protein	1.05878	0.156109	0.502069	7.99228	0.000326837	0.00474768	0.815227	0.209003	1	7.74539	1.37791e-06	2.30076e-05	Enriched GUL-1-GFP	Enriched GUL-1-GFP
NCU06290	Q7SAE0	hypothetical protein	1.05909	0.274053	0.629881	6.04258	0.0101758	0.040278	1.31924	0.126998	1	2.02944	0.059092	0.103092	Enriched GUL-1-GFP
NCU08553	Q7SBJ7	D directed R polymerase II 15 kDa subunit	1.06045	0.262739	0.619655	7.63163	0.000994816	0.010554	-0.425939	0.591734	1	7.18112	2.03947e-05	0.000219147	Enriched GUL-1-GFP	Enriched GUL-1-GFP
NCU07017	Q7S8D0	hypothetical protein	1.06156	0.172318	0.527001	6.55174	0.00352671	0.0239197	0.393431	0.567668	1	0.694642	0.372931	0.460883	Enriched GUL-1-GFP
NCU04290	V5ILQ0	hypothetical protein, variant	1.06171	0.254693	0.612576	5.95267	0.0101489	0.040278	0.567342	0.47202	1	5.37778	0.00141582	0.00590834	Enriched GUL-1-GFP	Enriched GUL-1-GFP
NCU02671	Q7SH58	cutise G-box binding protein	1.06277	0.0511849	0.291519	3.01812	2.42527e-05	0.000556092	0.0315504	0.94842	1	4.19739	1.57242e-13	7.51879e-12	Enriched GUL-1-GFP	Enriched GUL-1-GFP
NCU00935	Q7SFB2	hypothetical protein	1.06302	0.135065	0.47159	7.03873	0.00151814	0.0141242	0.571789	0.379696	1	2.38074	0.00262702	0.00947445	Enriched GUL-1-GFP	Enriched GUL-1-GFP
NCU03773	V5IM41	hypothetical protein, variant 1	1.06401	0.166047	0.518252	7.96731	0.000380713	0.00532698	-0.104805	0.876616	1	3.31715	3.93029e-05	0.000376495	Enriched GUL-1-GFP	Enriched GUL-1-GFP
NCU11282	A7UWE5	acyltransferase	1.06801	0.113108	0.429676	5.98642	0.00590103	0.0317963	0.0560297	0.925478	1	2.05487	0.00723455	0.0208309	Enriched GUL-1-GFP	Enriched GUL-1-GFP
NCU02632	Q7SDH8	sulfate transporter	1.06879	0.248149	0.606883	6.12559	0.00882848	0.0378677	0.0061848	0.994026	1	2.54939	0.0183796	0.0423034	Enriched GUL-1-GFP	Enriched GUL-1-GFP
NCU05598	P78710	rhamnogalacturose B	1.06893	0.146666	0.488424	6.69721	0.00262056	0.0202028	0.611784	0.341541	1	2.72968	0.00114053	0.00502254	Enriched GUL-1-GFP	Enriched GUL-1-GFP
NCU01722	V5INA4	hypothetical protein	1.07126	0.0718834	0.347971	7.36526	0.000607068	0.00757025	0.341997	0.503347	1	4.45049	6.70806e-07	1.22582e-05	Enriched GUL-1-GFP	Enriched GUL-1-GFP
NCU00015	Q7RY90	hypothetical protein	1.07386	0.294657	0.652289	5.77431	0.0153317	0.0486941	-0.561792	0.52684	1	-0.144353	0.887596	0.918932	Enriched GUL-1-GFP
NCU01509	F5HD64	hypothetical protein	1.07417	0.0352295	0.240646	2.17165	0.00365161	0.024303	-0.145672	0.732838	1	1.6254	0.00099883	0.00457041	Enriched GUL-1-GFP	Enriched GUL-1-GFP
NCU04193	Q1K7D8	hypothetical protein	1.0751	0.185155	0.541499	5.82769	0.00891312	0.0380279	-0.306406	0.63863	1	2.60655	0.00660909	0.0193979	Enriched GUL-1-GFP	Enriched GUL-1-GFP
NCU07788	Q1K639	fungal specific transcription factor	1.07542	0.230816	0.590095	6.37845	0.00591054	0.0317963	-0.184229	0.814361	1	2.33507	0.031407	0.0629456	Enriched GUL-1-GFP
NCU01680	P07038	plasma membrane ATPase	1.07648	0.0333241	0.234753	1.9271	0.00574942	0.0313396	0.245927	0.604939	1	3.13381	2.08491e-08	5.56429e-07	Enriched GUL-1-GFP	Enriched GUL-1-GFP
NCU07432	Q1K911	tetraspanin	1.07839	0.240807	0.596608	4.3668	0.000129222	0.00250958	0.161421	0.806423	1	9.23225	8.44913e-09	2.37653e-07	Enriched GUL-1-GFP	Enriched GUL-1-GFP
NCU02433	Q7S3X7	ATG4 protein	1.07901	0.242588	0.599484	6.13535	0.00867964	0.0375855	0.211619	0.795536	1	5.81074	0.000645996	0.00327875	Enriched GUL-1-GFP	Enriched GUL-1-GFP
NCU01288	V5IMZ5	hypothetical protein	1.08138	0.181767	0.538295	5.38808	0.0160479	0.0495949	-0.0318259	0.963468	1	0.151586	0.849038	0.888454	Enriched GUL-1-GFP
NCU07305	Q7SA57	hypothetical protein	1.08225	0.0372941	0.249427	3.70447	2.49521e-07	8.13575e-06	0.111798	0.802932	1	5.64157	2.59101e-17	1.67047e-15	Enriched GUL-1-GFP	Enriched GUL-1-GFP
NCU05041	Q7RX47	trehalose-phosphatase	1.08265	0.03382	0.235847	2.59628	0.00104678	0.0109084	0.834782	0.0685803	1	4.47034	1.40209e-09	4.44485e-08	Enriched GUL-1-GFP	Enriched GUL-1-GFP
NCU01835	Q1K574	hypothetical protein	1.08445	0.0611605	0.318698	4.73085	8.22183e-10	4.05839e-08	0.0766739	0.885339	1	5.08949	4.87779e-17	3.07569e-15	Enriched GUL-1-GFP	Enriched GUL-1-GFP
NCU04092	Q7RWL7	N-acylethanolamine amidohydrolase	1.08465	0.0797594	0.365361	2.91957	0.00063703	0.00775344	-0.318769	0.535262	1	4.35297	1.00627e-11	4.00971e-10	Enriched GUL-1-GFP	Enriched GUL-1-GFP
NCU06540	Q7S9I6	topisomerase II associated protein	1.08548	0.0887663	0.383173	6.72833	0.00185628	0.0161697	0.89589	0.106915	1	0.846611	0.179259	0.252229	Enriched GUL-1-GFP
NCU06020	Q7S4F8	chitise	1.08685	0.232515	0.590172	5.77931	0.0123708	0.0440512	0.260973	0.741342	1	6.17264	0.000235939	0.00150759	Enriched GUL-1-GFP	Enriched GUL-1-GFP
NCU10046	Q7S086	ubiquitin conjugating enzyme Ubc8	1.08716	0.202698	0.560972	6.17534	0.00705506	0.0343296	0.393633	0.599576	1	6.25018	0.000171294	0.00116318	Enriched GUL-1-GFP	Enriched GUL-1-GFP
NCU07649	Q7SAS6	integral membrane protein	1.08769	0.0645913	0.330039	2.63633	0.00202439	0.0169657	0.0949449	0.849478	1	3.99381	6.29474e-07	1.15767e-05	Enriched GUL-1-GFP	Enriched GUL-1-GFP
NCU09460	Q7S0L7	DH:ubiquinone oxidoreductase 20.1kD subunit	1.09172	0.248674	0.606883	5.7289	0.0146458	0.0473192	-0.0880932	0.915725	1	0.84431	0.431373	0.518262	Enriched GUL-1-GFP
NCU03106	Q7SFY8	hypothetical protein	1.09224	0.22255	0.58298	6.47328	0.00505885	0.0294905	-0.386739	0.620177	1	5.66286	0.00074604	0.00367449	Enriched GUL-1-GFP	Enriched GUL-1-GFP
NCU02637	Q7SDA9	hypothetical protein	1.09308	0.0500581	0.290186	3.67944	4.7284e-07	1.46128e-05	0.516542	0.307377	1	4.66142	5.65388e-16	3.27696e-14	Enriched GUL-1-GFP	Enriched GUL-1-GFP
NCU06578	Q7S8N6	KapG protein	1.09322	0.229516	0.589985	5.91165	0.0105633	0.0407395	1.53841	0.0802595	1	2.6534	0.0180805	0.0417993	Enriched GUL-1-GFP	Enriched GUL-1-GFP
NCU06760	Q7SCC3	pyruvate dehydrogese kise	1.0942	0.0334728	0.235367	1.84042	0.0136303	0.0458908	0.393335	0.371458	1	0.799474	0.125454	0.188493	Enriched GUL-1-GFP
NCU08159	Q7S4J1	hypothetical protein	1.09933	0.216157	0.574514	5.78824	0.0119492	0.0431579	-0.021717	0.977367	1	5.57213	0.00086853	0.00409164	Enriched GUL-1-GFP	Enriched GUL-1-GFP
NCU04227	Q1K6U6	hypothetical protein	1.10016	0.054254	0.301284	2.22753	0.000971127	0.0103957	0.178701	0.687329	1	4.10645	1.2201e-13	5.93299e-12	Enriched GUL-1-GFP	Enriched GUL-1-GFP
NCU00545	Q7SFA3	hypothetical protein	1.10242	0.0661188	0.334232	5.20375	1.33727e-10	6.98922e-09	0.201555	0.701107	1	7.17952	7.43882e-26	8.89249e-24	Enriched GUL-1-GFP	Enriched GUL-1-GFP
NCU04118	Q1K7N1	aspartokise	1.10265	0.230359	0.590095	5.90706	0.0106851	0.0409653	0.204839	0.796966	1	0.357248	0.69423	0.76108	Enriched GUL-1-GFP
NCU09263	Q7SF47	anchored cell wall protein 4	1.10371	0.0193247	0.181481	1.57905	0.0118609	0.0431579	-0.221138	0.605281	1	2.21484	6.14795e-06	8.16076e-05	Enriched GUL-1-GFP	Enriched GUL-1-GFP
NCU00833	Q7SEA1	hypothetical protein	1.10931	0.216505	0.574597	5.72022	0.0132862	0.0453622	0.877628	0.269151	1	1.84065	0.0608102	0.105374	Enriched GUL-1-GFP
NCU04156	Q92254	C-8 sterol isomerase erg-1	1.10989	0.168863	0.521649	5.61513	0.0116454	0.0428254	0.711733	0.276684	1	6.18678	0.000116349	0.00088075	Enriched GUL-1-GFP	Enriched GUL-1-GFP
NCU06737	Q1K8U6	hypothetical protein	1.11227	0.059413	0.315426	9.86465	5.07098e-31	1.80222e-27	0.177694	0.737705	1	10.5116	1.79919e-58	5.16188e-55	Enriched GUL-1-GFP	Enriched GUL-1-GFP
NCU08067	Q7SGL6	osmosensor protein	1.11435	0.0549446	0.30325	6.30106	2.66654e-09	1.23076e-07	0.782334	0.10477	1	5.05955	9.77031e-17	6.0937e-15	Enriched GUL-1-GFP	Enriched GUL-1-GFP
NCU00270	Q7RZU3	hypothetical protein	1.11588	0.225432	0.585901	7.2085	0.0017226	0.0153822	0.969557	0.210013	1	3.49524	0.00158302	0.00640123	Enriched GUL-1-GFP	Enriched GUL-1-GFP
NCU00744	Q7SED4	hypothetical protein	1.11648	0.121607	0.448048	2.7909	0.00572624	0.0313093	-0.129808	0.834847	1	1.83581	0.0127335	0.0320319	Enriched GUL-1-GFP	Enriched GUL-1-GFP
NCU00696	Q7SHV8	SH3 domain-containing protein	1.11983	0.134936	0.47159	5.59507	0.011756	0.0428961	0.988436	0.117798	1	0.109942	0.88371	0.91579	Enriched GUL-1-GFP
NCU07572	Q7S120	hypothetical protein	1.11987	0.166454	0.518907	7.06627	0.00140133	0.013388	-0.00639026	0.991871	1	3.32943	5.84363e-05	0.000514275	Enriched GUL-1-GFP	Enriched GUL-1-GFP
NCU08897	Q870W0	protein transporter SEC61 subunit alpha	1.12212	0.145177	0.487523	8.2786	0.000233702	0.00375827	0.69459	0.308688	1	9.44575	6.25305e-09	1.78508e-07	Enriched GUL-1-GFP	Enriched GUL-1-GFP
NCU00203	Q7RXM3	SIR2 family histone deacetylase	1.12217	0.160361	0.508773	5.97526	0.00680147	0.0338076	0.149735	0.811235	1	0.716679	0.353938	0.441307	Enriched GUL-1-GFP
NCU08452	Q7SC58	hypothetical protein	1.12681	0.075699	0.355264	3.99527	0.000897087	0.00990139	0.475532	0.369618	1	3.79231	3.31595e-07	6.49382e-06	Enriched GUL-1-GFP	Enriched GUL-1-GFP
NCU00589	Q7SI62	auxin Efflux Carrier superfamily protein	1.12982	0.121114	0.447482	5.7458	0.00957531	0.039433	0.28844	0.643983	1	1.93724	0.0272406	0.0564285	Enriched GUL-1-GFP
NCU01452	Q871N9	40S ribosomal protein S1	1.13016	0.0608854	0.318443	9.86896	5.57713e-06	0.000143631	0.480746	0.369103	1	4.22124	2.46826e-11	9.56953e-10	Enriched GUL-1-GFP	Enriched GUL-1-GFP
NCU03684	V5IL38	hypothetical protein	1.13035	0.0234106	0.199423	2.23047	0.000689544	0.00825131	-0.0472157	0.910531	1	2.3027	5.18199e-06	7.16488e-05	Enriched GUL-1-GFP	Enriched GUL-1-GFP
NCU00112	Q7RYL6	aminopeptidase P	1.13155	0.0756042	0.355264	5.97112	0.00558819	0.0309353	0.133497	0.796433	1	3.38764	0.000679404	0.00341069	Enriched GUL-1-GFP	Enriched GUL-1-GFP
NCU01465	V5ILK3	hypothetical protein, variant 1	1.13517	0.184688	0.541499	7.09841	0.00201097	0.0169607	1.37188	0.0722643	1	2.96607	0.00148533	0.00613593	Enriched GUL-1-GFP	Enriched GUL-1-GFP
NCU00414	Q7RYP8	adenosine kise	1.13546	0.146358	0.487782	7.06772	0.00172887	0.0153995	0.442371	0.536347	1	4.37777	3.02819e-05	0.000301663	Enriched GUL-1-GFP	Enriched GUL-1-GFP
NCU00502	Q7SE71	ATP synthase subunit 4	1.13934	0.149677	0.492929	5.68358	0.0110545	0.0416129	0.11955	0.859381	1	6.392	7.53438e-05	0.000632976	Enriched GUL-1-GFP	Enriched GUL-1-GFP
NCU00538	Q7SDK6	PAP/25A associated domain family protein	1.13975	0.0895629	0.386217	6.63671	0.00237776	0.0188085	0.441476	0.452404	1	2.88338	0.000719107	0.00356941	Enriched GUL-1-GFP	Enriched GUL-1-GFP
NCU04232	Q1K7K0	hypothetical protein	1.14072	0.173709	0.529193	5.86743	0.0104145	0.0405401	-0.482477	0.522807	1	5.86462	0.000418107	0.00233375	Enriched GUL-1-GFP	Enriched GUL-1-GFP
NCU03441	Q96U88	ATG18	1.14393	0.236632	0.59382	6.37153	0.00679144	0.0338076	0.734504	0.395953	1	3.31824	0.00255666	0.00934401	Enriched GUL-1-GFP	Enriched GUL-1-GFP
NCU08997	U9W3G5	repressible alkaline phosphatase, variant 1	1.14582	0.14134	0.48171	5.82012	0.00937796	0.039036	0.199637	0.765053	1	6.91245	1.91715e-05	0.000208345	Enriched GUL-1-GFP	Enriched GUL-1-GFP
NCU02272	Q7S594	hypothetical protein	1.14765	0.141207	0.48171	5.75932	0.00975961	0.0395503	-0.127763	0.857206	1	5.17084	0.00132498	0.00561502	Enriched GUL-1-GFP	Enriched GUL-1-GFP
NCU11369	V5IM28	BAR domain-containing protein	1.14824	0.175143	0.530753	6.43066	0.00508027	0.0294905	1.18377	0.121831	1	2.94645	0.00742076	0.0212159	Enriched GUL-1-GFP	Enriched GUL-1-GFP
NCU07020	Q7S9B5	vacuolar protein sorting-associated protein vps17	1.15158	0.0840322	0.372243	6.50869	0.00284694	0.0214365	-0.0753397	0.894999	1	2.55819	0.00128911	0.0054878	Enriched GUL-1-GFP	Enriched GUL-1-GFP
NCU02041	Q7SF37	anchored cell wall protein 11	1.15335	0.192959	0.550976	6.01339	0.00914378	0.0385036	0.216164	0.778782	1	6.46944	0.000112846	0.000859535	Enriched GUL-1-GFP	Enriched GUL-1-GFP
NCU03593	Q7S7W0	homeobox domain-containing protein	1.15434	0.0267813	0.21123	6.82096	2.93409e-23	2.08555e-20	0.437339	0.347641	1	8.4277	6.69262e-54	6.40037e-51	Enriched GUL-1-GFP	Enriched GUL-1-GFP
NCU04584	Q872F4	hypothetical protein	1.15478	0.263203	0.619655	6.67291	0.00451877	0.0274525	-0.0812714	0.925053	1	2.79878	0.0171145	0.0400502	Enriched GUL-1-GFP	Enriched GUL-1-GFP
NCU04173	P78711	actin, variant	1.15998	0.0257417	0.210075	2.02379	0.00736889	0.0348749	0.216839	0.644136	1	2.42172	2.71445e-05	0.000277145	Enriched GUL-1-GFP	Enriched GUL-1-GFP
NCU02250	P00842	ATP synthase subunit ATP9	1.16134	0.0406211	0.259418	7.17264	0.000852019	0.00958251	0.636127	0.200011	1	3.2328	1.32313e-05	0.000152452	Enriched GUL-1-GFP	Enriched GUL-1-GFP
NCU09162	U9W2M0	WD repeat protein	1.16255	0.120617	0.447128	6.94902	0.001809	0.0159533	1.5017	0.0220639	1	2.60425	0.00151188	0.00619654	Enriched GUL-1-GFP	Enriched GUL-1-GFP
NCU06871	Q7S0A7	1,3-beta-glucan synthase component GLS1	1.16417	0.0327767	0.233231	2.14233	0.00363223	0.0242677	0.234671	0.647157	1	3.12644	7.00157e-08	1.607e-06	Enriched GUL-1-GFP	Enriched GUL-1-GFP
NCU06487	Q7RYI7	hypothetical protein	1.16942	0.126911	0.456248	7.67467	0.00057493	0.00729751	0.589691	0.363081	1	7.48289	3.27386e-06	4.76787e-05	Enriched GUL-1-GFP	Enriched GUL-1-GFP
NCU03569	Q1K4V5	hypothetical protein	1.16942	0.149616	0.492929	4.38711	0.000648799	0.00784296	0.383073	0.585951	1	2.61387	0.00256651	0.00936212	Enriched GUL-1-GFP	Enriched GUL-1-GFP
NCU16512	V5IQV1	hypothetical protein	1.17112	0.114329	0.43216	4.09304	0.00153114	0.0141998	-0.0455206	0.938762	1	3.40571	2.5398e-05	0.00026401	Enriched GUL-1-GFP	Enriched GUL-1-GFP
NCU00006	U9W339	hypothetical protein, variant	1.17212	0.197758	0.556409	5.67584	0.0137488	0.0460107	-0.567644	0.469479	1	2.1922	0.0493358	0.0891899	Enriched GUL-1-GFP
NCU03681	Q1K809	hypothetical protein	1.17311	0.108012	0.418003	6.14813	0.00526714	0.0298724	0.591716	0.319743	1	3.24	0.00092194	0.00429042	Enriched GUL-1-GFP	Enriched GUL-1-GFP
NCU01640	Q1K4S1	C2H2 transcription factor	1.17747	0.0383516	0.251477	2.75777	0.000583108	0.00734253	0.451253	0.368373	1	2.03336	0.000565334	0.00297033	Enriched GUL-1-GFP	Enriched GUL-1-GFP
NCU03915	Q1K5Z6	hypothetical protein	1.18364	0.131778	0.465297	7.13661	0.00134679	0.0130422	0.361112	0.578746	1	7.68034	1.71886e-06	2.79482e-05	Enriched GUL-1-GFP	Enriched GUL-1-GFP
NCU02730	Q7SGB9	hypothetical protein	1.1848	0.12236	0.448866	6.70533	9.10457e-09	3.55579e-07	0.348167	0.601222	1	6.05404	8.72401e-12	3.50059e-10	Enriched GUL-1-GFP	Enriched GUL-1-GFP
NCU06003	Q7RVR8	mannose-1-phosphate guanyltransferase	1.18582	0.026871	0.21123	4.99923	1.36646e-11	8.3731e-10	0.50238	0.282931	1	5.75418	1.59604e-25	1.83162e-23	Enriched GUL-1-GFP	Enriched GUL-1-GFP
NCU05267	Q7S858	nonsense-mediated mR decay factor	1.1872	0.0706522	0.344953	6.28446	0.00373914	0.0246547	0.449805	0.41899	1	1.00668	0.115216	0.175733	Enriched GUL-1-GFP
NCU07069	Q7S6F4	pre-mR splicing factor	1.18892	0.210932	0.566327	6.86924	0.003393	0.0235063	1.12458	0.187762	1	6.93999	4.84409e-05	0.000445009	Enriched GUL-1-GFP	Enriched GUL-1-GFP
NCU06405	Q7RW27	D polymerase epsilon subunit C	1.19108	0.187288	0.543599	5.60524	0.0141993	0.0466336	0.574767	0.446587	1	5.74573	0.00052975	0.00281977	Enriched GUL-1-GFP	Enriched GUL-1-GFP
NCU04469	Q7RYD8	hypothetical protein	1.19376	0.0293187	0.220626	2.04516	0.00398815	0.0258177	0.378008	0.429744	1	2.99063	4.23675e-08	1.03446e-06	Enriched GUL-1-GFP	Enriched GUL-1-GFP
NCU00642	Q7SI10	beta-galactosidase	1.1952	0.071405	0.346848	3.68442	0.00082168	0.00938225	0.225017	0.703697	1	3.09199	5.89758e-05	0.000517436	Enriched GUL-1-GFP	Enriched GUL-1-GFP
NCU05064	Q7RXC0	C2H2 transcription factor	1.19603	0.0324829	0.232666	7.76803	0.000302147	0.00451189	0.659492	0.180443	1	2.55669	4.86503e-05	0.000445224	Enriched GUL-1-GFP	Enriched GUL-1-GFP
NCU08762	P38670	c-14 sterol reductase ERG-3	1.19645	0.180836	0.537569	17.6739	3.3904e-14	3.01237e-12	0.206044	0.798027	1	24.1903	3.68844e-46	1.51173e-43	Enriched GUL-1-GFP	Enriched GUL-1-GFP
NCU00585	P37295	phytoene synthase	1.19799	0.153368	0.497045	21.2909	2.9185e-20	1.72873e-17	0.302078	0.692997	1	3.92742	9.82112e-06	0.00012119	Enriched GUL-1-GFP	Enriched GUL-1-GFP
NCU09270	Q7S1N7	hypothetical protein	1.19805	0.0531561	0.298324	2.49208	0.0154052	0.0487947	-0.0803439	0.881813	1	7.41598	1.85128e-06	2.96721e-05	Enriched GUL-1-GFP	Enriched GUL-1-GFP
NCU08870	Q1K6K9	hypothetical protein	1.1984	0.183992	0.541469	6.03661	0.00833952	0.0368182	0.456027	0.555298	1	6.00493	0.000298171	0.00178591	Enriched GUL-1-GFP	Enriched GUL-1-GFP
NCU06179	Q7SBJ1	serine/threonine-protein kise hal4	1.19851	0.0314605	0.230785	3.44491	3.37463e-05	0.000759077	0.272842	0.567324	1	4.54869	9.26474e-13	4.12102e-11	Enriched GUL-1-GFP	Enriched GUL-1-GFP
NCU06277	Q7SB64	microtubule associated protein	1.1989	0.104269	0.413849	6.83022	0.00205269	0.0169657	0.109728	0.864302	1	7.81508	9.7809e-07	1.71863e-05	Enriched GUL-1-GFP	Enriched GUL-1-GFP
NCU07135	Q7S6B7	hypothetical protein	1.20151	0.155162	0.500163	6.15899	0.00461599	0.0276182	0.0462226	0.94036	1	6.97023	7.91567e-06	0.000100934	Enriched GUL-1-GFP	Enriched GUL-1-GFP
NCU08070	Q7SGL3	meiotically up-regulated 182 protein	1.20282	0.0727504	0.350749	7.35708	0.000737046	0.00870253	0.185845	0.739153	1	8.53846	4.84652e-08	1.15872e-06	Enriched GUL-1-GFP	Enriched GUL-1-GFP
NCU02794	Q7SDK1	Fso1	1.20311	0.10706	0.416491	6.39937	0.00392213	0.0255766	-0.174158	0.794033	1	1.85793	0.0197635	0.0446293	Enriched GUL-1-GFP	Enriched GUL-1-GFP
NCU00680	Q7SHX3	2-methylcitrate dehydratase	1.20853	0.146073	0.487593	6.04789	0.00809998	0.0365049	-0.519061	0.486608	1	2.11715	0.0516706	0.0925362	Enriched GUL-1-GFP
NCU02164	Q7SEQ3	hypothetical protein	1.21124	0.0327861	0.233231	1.99581	0.00998264	0.0399981	0.329322	0.508411	1	3.58664	2.9997e-08	7.71852e-07	Enriched GUL-1-GFP	Enriched GUL-1-GFP
NCU07932	V5IM92	hypothetical protein	1.2119	0.0507307	0.291305	2.92868	0.000436526	0.00594412	0.367462	0.503549	1	5.77781	6.74324e-12	2.72484e-10	Enriched GUL-1-GFP	Enriched GUL-1-GFP
NCU05364	Q1K8L1	tyrosine-protein phosphatase non-receptor type 6	1.21305	0.0262325	0.21123	1.8753	0.0131945	0.0451764	0.798467	0.0995597	1	2.61202	6.97645e-06	9.09792e-05	Enriched GUL-1-GFP	Enriched GUL-1-GFP
NCU02618	Q7SG02	peroxisomal membrane protein	1.21713	0.0321268	0.231344	7.19075	0.000770814	0.00889439	-0.0965077	0.834459	1	1.21557	0.0332554	0.065868	Enriched GUL-1-GFP
NCU08471	Q9P567	succinyl-CoA ligase beta-chain	1.21912	0.0240053	0.201282	7.04668	0.000944578	0.010242	0.483565	0.313298	1	3.8836	8.06043e-06	0.000102358	Enriched GUL-1-GFP	Enriched GUL-1-GFP
NCU08132	Q7S4J9	alpha-1,3-glucan synthase Ags2	1.2205	0.0377221	0.249427	2.40469	0.0018398	0.0160655	-0.0330253	0.949793	1	3.90329	1.73301e-10	6.02667e-09	Enriched GUL-1-GFP	Enriched GUL-1-GFP
NCU00694	Q7SHW0	hypothetical protein	1.22136	0.0955618	0.398166	8.50707	0.000134498	0.00256992	0.523486	0.417898	1	4.16054	5.54222e-07	1.03926e-05	Enriched GUL-1-GFP	Enriched GUL-1-GFP
NCU02181	Q7SE03	40S ribosomal protein S4	1.22392	0.0473001	0.280309	2.21374	0.0126831	0.0444534	0.845635	0.115362	1	2.33147	0.000414014	0.00231993	Enriched GUL-1-GFP	Enriched GUL-1-GFP
NCU00868	Q7SFG3	hypothetical protein	1.22591	0.201577	0.560775	5.8288	0.0122193	0.0437861	-0.535814	0.516036	1	6.10823	0.000307083	0.00182595	Enriched GUL-1-GFP	Enriched GUL-1-GFP
NCU03010	Q1K933	L-aminoadipate-semialdehyde dehydrogese large subunit	1.2287	0.277627	0.63419	6.45215	0.00982863	0.0396562	0.264762	0.805689	1	3.17277	0.011165	0.0288366	Enriched GUL-1-GFP	Enriched GUL-1-GFP
NCU02789	Q7SD73	hypothetical protein	1.22894	0.155966	0.501989	6.10717	0.00765706	0.0354338	0.268875	0.735477	1	1.94498	0.0448772	0.0831736	Enriched GUL-1-GFP
NCU02934	Q7SHH0	hypothetical protein	1.23196	0.183875	0.541469	5.81631	0.0113721	0.0420566	-0.138645	0.860758	1	1.87998	0.0754308	0.125565	Enriched GUL-1-GFP
NCU04389	Q7RZ84	SET-4	1.23223	0.0513639	0.292145	2.48694	0.0117553	0.0428961	0.372709	0.495589	1	2.79895	0.000107469	0.000826619	Enriched GUL-1-GFP	Enriched GUL-1-GFP
NCU02617	Q7SG03	kelch repeat-containing protein	1.23486	0.124135	0.453253	5.75766	0.00949786	0.0392504	0.0337694	0.957974	1	2.21631	0.0191931	0.0436504	Enriched GUL-1-GFP	Enriched GUL-1-GFP
NCU04648	V5INQ7	glutamine-dependent D(+) synthetase, variant	1.23536	0.145737	0.487593	5.69007	0.0120179	0.0432303	-0.234122	0.7439	1	0.653337	0.442187	0.528488	Enriched GUL-1-GFP
NCU02223	Q7S4H0	hypothetical protein	1.23981	0.148065	0.491275	6.03861	0.00824594	0.0367844	0.433782	0.561773	1	0.497695	0.588064	0.66607	Enriched GUL-1-GFP
NCU10715	V5ILF2	oxysterol binding protein, variant	1.24171	0.0395886	0.255047	6.3082	0.00339074	0.0235063	0.65037	0.208371	1	1.28429	0.0453557	0.0839478	Enriched GUL-1-GFP
NCU03421	Q1K4M8	C2H2 finger domain-containing protein	1.24396	0.338975	0.695385	7.35109	0.00123855	0.0122955	-0.867205	0.295158	1	7.7109	2.90853e-06	4.29027e-05	Enriched GUL-1-GFP	Enriched GUL-1-GFP
NCU07655	Q7SAX7	hypothetical protein	1.24562	0.118885	0.442985	5.99571	0.00742729	0.0348868	0.41004	0.575853	1	0.85626	0.30104	0.38609	Enriched GUL-1-GFP
NCU01729	V5IN99	hypothetical protein, variant 2	1.24723	0.110678	0.424047	6.0894	0.00609403	0.0321818	-0.0529719	0.935963	1	1.70972	0.0343964	0.0675258	Enriched GUL-1-GFP
NCU00967	Q7SGF5	hypothetical protein	1.24884	0.103673	0.413712	7.3501	0.00103443	0.0108129	0.340404	0.609698	1	3.58841	8.43353e-05	0.000690323	Enriched GUL-1-GFP	Enriched GUL-1-GFP
NCU02015	Q7SFL7	palmitoyltransferase ERF2	1.25099	0.0574607	0.310338	5.20338	1.3851e-08	5.12777e-07	0.672408	0.205125	1	11.3499	2.10712e-13	9.82978e-12	Enriched GUL-1-GFP	Enriched GUL-1-GFP
NCU00239	U9W365	AMP binding domain-containing protein	1.25129	0.0508368	0.291305	6.7871	0.00173703	0.0154335	1.7235	0.00331305	0.707943	1.77633	0.00445444	0.0142235	Enriched GUL-1-GFP	Enriched GUL-1-GFP
NCU05278	Q7S8K7	cytochrome P450 61	1.25212	0.0268307	0.21123	2.12868	0.00959509	0.0394621	0.335878	0.485181	1	2.6302	9.95014e-06	0.000121996	Enriched GUL-1-GFP	Enriched GUL-1-GFP
NCU00506	Q7SE67	ER membrane protein	1.25544	0.148103	0.491275	7.26475	0.00133567	0.0129699	-0.493088	0.495929	1	4.65407	1.15436e-05	0.000138423	Enriched GUL-1-GFP	Enriched GUL-1-GFP
NCU00142	Q7RWV1	hypothetical protein	1.25819	0.0669042	0.336632	9.86981	5.8436e-06	0.000148344	0.199473	0.728084	1	10.2447	5.63975e-11	2.10136e-09	Enriched GUL-1-GFP	Enriched GUL-1-GFP
NCU05723	U9W4H5	hypothetical protein, variant	1.26373	0.0107853	0.13173	1.82326	0.00514655	0.0295055	0.614655	0.1562	1	3.71938	6.10019e-11	2.22948e-09	Enriched GUL-1-GFP	Enriched GUL-1-GFP
NCU04114	Q7S7U5	hypothetical protein	1.26921	0.100548	0.40936	6.56689	0.00335573	0.0235063	-0.0725184	0.912721	1	6.31609	9.42879e-05	0.000748304	Enriched GUL-1-GFP	Enriched GUL-1-GFP
NCU01294	Q1K7W9	hydrolase	1.27095	0.133375	0.467752	6.14778	0.0068835	0.034025	0.197451	0.785383	1	1.58934	0.0770375	0.127721	Enriched GUL-1-GFP
NCU03621	Q1K7R2	nuclear migration protein	1.27358	0.0416994	0.261845	3.1526	0.0003366	0.00484322	-0.138312	0.790934	1	3.72654	5.23875e-09	1.52589e-07	Enriched GUL-1-GFP	Enriched GUL-1-GFP
NCU06482	Q7RYJ2	pyruvate dehydrogese E1 component alpha subunit	1.27497	0.0861422	0.37663	6.48342	0.00365083	0.024303	0.189431	0.777474	1	2.91932	0.000872436	0.00410667	Enriched GUL-1-GFP	Enriched GUL-1-GFP
NCU07915	Q7SA03	integral membrane protein	1.27697	0.174313	0.529193	6.91375	0.00326063	0.0233635	0.281616	0.736793	1	7.31944	1.91512e-05	0.000208345	Enriched GUL-1-GFP	Enriched GUL-1-GFP
NCU07282	Q7S985	hypothetical protein	1.27779	0.0364815	0.245104	2.40871	0.0104651	0.040648	1.1022	0.0501349	1	4.03746	1.01471e-06	1.76972e-05	Enriched GUL-1-GFP	Enriched GUL-1-GFP
NCU08597	Q7SCN1	hypothetical protein	1.28221	0.0316905	0.230903	2.15145	0.0156964	0.0490842	0.208855	0.679006	1	1.8401	0.00204405	0.00787163	Enriched GUL-1-GFP	Enriched GUL-1-GFP
NCU07173	Q1K5W4	ADP-ribosylation factor 6	1.28293	0.106581	0.416278	11.0788	9.5086e-07	2.81613e-05	0.449057	0.527186	1	5.47916	5.9025e-11	2.17106e-09	Enriched GUL-1-GFP	Enriched GUL-1-GFP
NCU09637	V5IM40	sterigmatocystin 8-O-methyltransferase, variant	1.28316	0.0785152	0.363025	6.85453	0.00196121	0.016741	1.90614	0.00326932	0.707943	3.78875	0.000130595	0.000965663	Enriched GUL-1-GFP	Enriched GUL-1-GFP
NCU05425	Q7SC30	2-oxoglutarate dehydrogese E1 component	1.2847	0.038834	0.25326	8.2272	0.000150402	0.00274118	0.81546	0.142198	1	3.17114	1.452e-06	2.41494e-05	Enriched GUL-1-GFP	Enriched GUL-1-GFP
NCU08565	Q7SB29	hypothetical protein	1.28767	0.00952342	0.12399	7.14267	0.000748968	0.00873536	0.837448	0.0500008	1	2.63151	2.7856e-05	0.000282399	Enriched GUL-1-GFP	Enriched GUL-1-GFP
NCU04052	Q7RZG4	hypothetical protein	1.289	0.46062	0.777699	6.99745	0.013006	0.0448335	2.338	0.124034	1	7.39044	0.000453794	0.00247987	Enriched GUL-1-GFP	Enriched GUL-1-GFP
NCU08288	Q7S8A5	hypothetical protein	1.28947	0.0154253	0.162827	2.1096	0.00991623	0.0399003	0.232568	0.59778	1	0.88572	0.0913402	0.14603	Enriched GUL-1-GFP
NCU05820	Q7S5M3	hypothetical protein	1.29216	0.17072	0.523179	6.44101	0.00507118	0.0294905	-0.574371	0.466434	1	7.14613	1.82808e-05	0.000200949	Enriched GUL-1-GFP	Enriched GUL-1-GFP
NCU09502	Q7S1G9	hypothetical protein	1.29301	0.128205	0.458758	5.86862	0.0102117	0.040313	0.662572	0.366415	1	1.18843	0.198135	0.274414	Enriched GUL-1-GFP
NCU07929	Q7S9Y9	eukaryotic translation initiation factor 3 subunit 3	1.29534	0.111438	0.425801	5.76998	0.0102654	0.040313	0.604316	0.39335	1	5.55687	0.00063263	0.00322383	Enriched GUL-1-GFP	Enriched GUL-1-GFP
NCU06915	Q7S3D8	hypothetical protein	1.29592	0.126762	0.456248	3.54183	0.00663097	0.033286	0.163572	0.831871	1	1.00671	0.275698	0.359128	Enriched GUL-1-GFP
NCU06756	V5IPD6	ubiquitin-protein ligase	1.29679	0.0710225	0.345387	7.21451	0.00108229	0.0110849	0.721591	0.237208	1	3.73831	2.58174e-05	0.000266474	Enriched GUL-1-GFP	Enriched GUL-1-GFP
NCU02289	Q7RVS7	ubiquitin-conjugating enzyme E2	1.29681	0.0804457	0.365552	8.5631	0.000126699	0.00247412	0.294069	0.654214	1	2.57627	0.000614431	0.00315632	Enriched GUL-1-GFP	Enriched GUL-1-GFP
NCU09160	Q7S355	HPP family protein	1.29806	0.015587	0.163046	1.68616	0.0133519	0.0454963	0.463557	0.320963	1	2.99112	3.63018e-08	9.09605e-07	Enriched GUL-1-GFP	Enriched GUL-1-GFP
NCU01908	Q7SH98	hypothetical protein	1.30125	0.038469	0.251657	7.97235	0.00021017	0.00350678	-0.00402613	0.993533	1	2.7786	6.61383e-06	8.68425e-05	Enriched GUL-1-GFP	Enriched GUL-1-GFP
NCU08674	V5IMH4	pentatricopeptide repeat protein, variant	1.30265	0.0206592	0.18691	7.61556	0.00036543	0.00515372	0.0539834	0.910234	1	2.60621	3.13185e-05	0.000309838	Enriched GUL-1-GFP	Enriched GUL-1-GFP
NCU00315	Q7RZP9	60S ribosomal protein L29	1.30747	0.140104	0.480585	6.32065	0.00619695	0.0322932	0.0995464	0.896799	1	6.29178	0.000177122	0.00119708	Enriched GUL-1-GFP	Enriched GUL-1-GFP
NCU05137	Q1K5A2	non-anchored cell wall protein 1	1.30846	0.0206864	0.18691	5.72396	5.56826e-11	3.1412e-09	0.405359	0.434995	1	6.10399	2.80256e-22	2.59372e-20	Enriched GUL-1-GFP	Enriched GUL-1-GFP
NCU02493	Q7SG71	proteasome component C1	1.3125	0.0739799	0.353664	6.40435	0.00404689	0.0259809	0.602101	0.358676	1	2.14504	0.0121653	0.0308732	Enriched GUL-1-GFP	Enriched GUL-1-GFP
NCU02187	Q7SDZ7	hypothetical protein	1.31652	0.0319112	0.230974	2.849	0.000173559	0.00305764	0.737731	0.156611	1	4.15074	1.16951e-11	4.62804e-10	Enriched GUL-1-GFP	Enriched GUL-1-GFP
NCU02886	Q7SHL8	hypothetical protein	1.31809	0.0284863	0.217691	2.46766	0.00428359	0.0265382	0.843336	0.10894	1	3.15271	7.87541e-06	0.000100644	Enriched GUL-1-GFP	Enriched GUL-1-GFP
NCU06198	Q7SBC5	GDP-mannose transporter	1.31818	0.110303	0.423378	8.28935	0.000239802	0.00383899	0.117907	0.869132	1	8.09124	7.15365e-07	1.3031e-05	Enriched GUL-1-GFP	Enriched GUL-1-GFP
NCU08195	Q7S3P2	arginyl-tR synthetase	1.31898	0.0946854	0.396213	8.36664	0.000220409	0.00360983	1.17019	0.104891	1	3.0562	0.000168992	0.00115713	Enriched GUL-1-GFP	Enriched GUL-1-GFP
NCU02049	Q7SF29	hypothetical protein	1.32565	0.030896	0.228263	3.58964	4.30572e-06	0.000115057	0.673271	0.184834	1	5.31158	7.00282e-16	3.97843e-14	Enriched GUL-1-GFP	Enriched GUL-1-GFP
NCU01353	Q1K7S6	mixed-linked glucase	1.32801	0.094528	0.396213	3.93613	0.000153305	0.00277673	-0.104503	0.885879	1	6.90059	3.49373e-15	1.9276e-13	Enriched GUL-1-GFP	Enriched GUL-1-GFP
NCU01648	Q1K4Z4	dolichyl-phosphate-mannose-protein mannosyltransferase 2	1.33257	0.0848263	0.374583	3.54825	0.000567321	0.00725272	-0.0470843	0.94548	1	5.60472	3.29861e-11	1.26183e-09	Enriched GUL-1-GFP	Enriched GUL-1-GFP
NCU14121	#N/A		1.33319	0.257168	0.615049	21.5286	3.19237e-17	7.56378e-15	-0.0197399	0.985549	1	25.2137	7.7351e-41	2.11352e-38	Enriched GUL-1-GFP	Enriched GUL-1-GFP
NCU09322	V5IRJ9	chitin synthase activator	1.33355	0.0744207	0.353881	6.88722	0.00183491	0.0160622	0.779149	0.211516	1	3.18981	0.000111801	0.000856497	Enriched GUL-1-GFP	Enriched GUL-1-GFP
NCU02294	Q7S576	hypothetical protein	1.33409	0.114529	0.432438	5.40414	0.015999	0.04953	0.327948	0.634668	1	5.8104	0.000337812	0.0019639	Enriched GUL-1-GFP	Enriched GUL-1-GFP
NCU16396	V5IQT0	hypothetical protein	1.33439	0.0319734	0.230974	2.50792	0.0146149	0.0472624	0.273176	0.606025	1	2.7524	0.000355983	0.00204878	Enriched GUL-1-GFP	Enriched GUL-1-GFP
NCU05803	Q7S5P0	translatiol activator	1.3448	0.0758279	0.355264	6.99576	0.0017808	0.0157437	0.415092	0.5661	1	2.71243	0.00123553	0.0053546	Enriched GUL-1-GFP	Enriched GUL-1-GFP
NCU01994	V5IQK5	bZIP transcription factor, variant	1.34565	0.2083	0.565321	6.5583	0.00666816	0.0333784	-0.138588	0.882104	1	6.02092	0.000675881	0.00339895	Enriched GUL-1-GFP	Enriched GUL-1-GFP
NCU02438	Q7S3Y3	dihydrolipoamide succinyltransferase	1.34732	0.0913996	0.389014	5.73388	0.01079	0.0411456	-0.0521865	0.939767	1	1.97303	0.029396	0.0597289	Enriched GUL-1-GFP
NCU09482	Q7SC01	hypothetical protein	1.34831	0.168577	0.521527	6.18213	0.00900145	0.0382212	0.603464	0.496568	1	6.6896	0.000107068	0.000826619	Enriched GUL-1-GFP	Enriched GUL-1-GFP
NCU09332	Q7SD53	mannosyltransferase PMTI	1.35076	0.125965	0.455564	6.16875	0.00760786	0.0353232	0.462115	0.55415	1	6.58277	8.85053e-05	0.000715272	Enriched GUL-1-GFP	Enriched GUL-1-GFP
NCU07238	Q7RWA8	hypothetical protein	1.35134	0.00489387	0.0907084	3.64636	1.96068e-09	9.16877e-08	0.458016	0.264423	1	5.06116	7.88306e-26	9.23123e-24	Enriched GUL-1-GFP	Enriched GUL-1-GFP
NCU00135	U9W8C3	phosphatidyl synthase	1.35367	0.149885	0.492929	5.91951	0.00879437	0.0377935	0.196164	0.796883	1	6.28365	0.00012107	0.000909289	Enriched GUL-1-GFP	Enriched GUL-1-GFP
NCU08920	Q1K670	ATP-binding cassette sub-family F member 2	1.35453	0.0507529	0.291305	3.58853	0.000617652	0.00764643	-0.359284	0.550286	1	3.9583	1.78423e-07	3.70939e-06	Enriched GUL-1-GFP	Enriched GUL-1-GFP
NCU06259	Q7SB54	sorting nexin-41	1.35455	0.0812564	0.368049	5.8188	0.00947151	0.0392328	1.22448	0.0729538	1	6.18366	0.000135426	0.000989903	Enriched GUL-1-GFP	Enriched GUL-1-GFP
NCU09496	Q7S009	C2H2 transcription factor	1.35701	0.00802878	0.116469	2.20724	0.00235458	0.0187628	0.786481	0.0853054	1	2.87829	1.82999e-07	3.7908e-06	Enriched GUL-1-GFP	Enriched GUL-1-GFP
NCU08218	Q7S3M5	palmitoyltransferase AKR1	1.35739	0.12308	0.450745	5.79962	0.0106406	0.0408386	0.156684	0.834511	1	5.95557	0.0002935	0.0017677	Enriched GUL-1-GFP	Enriched GUL-1-GFP
NCU09728	Q7SEJ5	hypothetical protein	1.35931	0.141419	0.48171	6.5549	0.00412164	0.0261013	0.284607	0.714484	1	2.67002	0.00783374	0.0220646	Enriched GUL-1-GFP	Enriched GUL-1-GFP
NCU07258	Q7S957	phosphoglycerate mutase	1.36171	0.0451328	0.274992	8.35263	0.000135325	0.0025719	0.368127	0.518198	1	2.98606	1.21849e-05	0.000143567	Enriched GUL-1-GFP	Enriched GUL-1-GFP
NCU10518	V5ILB6	general stress response protein Whi2	1.36306	0.0128488	0.1466	3.12883	0.000280115	0.00423688	0.390764	0.403742	1	4.95959	1.08726e-09	3.5049e-08	Enriched GUL-1-GFP	Enriched GUL-1-GFP
NCU04140	P20080	peptidyl-prolyl cis-trans isomerase fkr-2	1.3647	0.102282	0.411284	6.69593	0.00334059	0.0235063	0.598689	0.423318	1	1.69382	0.0686754	0.116345	Enriched GUL-1-GFP
NCU01666	Q1K5I3	acetolactate synthase small subunit	1.36798	0.148717	0.492537	6.50552	0.00567311	0.0311627	1.36675	0.156706	1	7.31607	1.96153e-05	0.000212765	Enriched GUL-1-GFP	Enriched GUL-1-GFP
NCU08610	Q7SFK8	hypothetical protein	1.36861	0.0149705	0.160571	2.95356	3.94858e-05	0.000877077	0.266552	0.592482	1	4.91728	1.44347e-17	9.63098e-16	Enriched GUL-1-GFP	Enriched GUL-1-GFP
NCU05292	Q7S906	D damage-inducible protein 1	1.36934	0.0837974	0.371913	6.46866	0.00398101	0.0258177	-0.0969502	0.886656	1	1.83208	0.0317923	0.0635404	Enriched GUL-1-GFP
NCU05685	U9W4G5	hypothetical protein	1.37349	0.0693651	0.343252	2.90407	0.0108028	0.0411504	0.540424	0.39776	1	8.01349	5.7022e-07	1.06231e-05	Enriched GUL-1-GFP	Enriched GUL-1-GFP
NCU04303	Q1K728	asparagine synthetase 2	1.37493	0.189035	0.544927	4.14397	0.00308019	0.0225711	0.266596	0.783482	1	8.502	3.57286e-11	1.34875e-09	Enriched GUL-1-GFP	Enriched GUL-1-GFP
NCU09076	Q7RW10	ATP-dependent R helicase	1.376	0.0438145	0.270307	2.68465	0.00527012	0.0298724	0.0148047	0.98	1	4.06837	6.31167e-08	1.46625e-06	Enriched GUL-1-GFP	Enriched GUL-1-GFP
NCU02592	Q7SG28	chitin synthase activator	1.37658	0.124468	0.453841	5.64655	0.0140749	0.0464029	0.396683	0.612146	1	6.49384	9.96819e-05	0.000783527	Enriched GUL-1-GFP	Enriched GUL-1-GFP
NCU00726	P10255	peptidyl-prolyl cis-trans isomerase	1.37831	0.0165281	0.165909	2.64996	0.00121632	0.0122222	0.438205	0.391602	1	4.6227	3.91532e-08	9.6421e-07	Enriched GUL-1-GFP	Enriched GUL-1-GFP
NCU11365	A7UX13	aminotransferase	1.37939	0.179581	0.535942	6.1596	0.010168	0.040278	-0.262319	0.785973	1	1.49447	0.154855	0.223368	Enriched GUL-1-GFP
NCU03102	Q7SFZ2	40S ribosomal protein S11	1.37943	0.0671479	0.336869	7.06323	0.00159219	0.0145841	0.140885	0.829398	1	3.85549	0.000168281	0.00115364	Enriched GUL-1-GFP	Enriched GUL-1-GFP
NCU04737	Q7S6G9	chromatin regulatory protein sir2	1.38782	0.0209993	0.188213	2.11364	0.0058551	0.0316728	-0.0378868	0.93788	1	3.22941	1.35453e-07	2.94406e-06	Enriched GUL-1-GFP	Enriched GUL-1-GFP
NCU11174	A7UVT6	MIP-2A	1.38843	0.137853	0.474918	5.71985	0.0128633	0.0446841	0.439682	0.579274	1	1.83222	0.0739191	0.123406	Enriched GUL-1-GFP
NCU16460	V5IQM0	hypothetical protein	1.389	0.0263969	0.21123	5.71854	3.00011e-09	1.34967e-07	0.0542213	0.920455	1	6.76753	1.759e-18	1.26165e-16	Enriched GUL-1-GFP	Enriched GUL-1-GFP
NCU04449	Q7RWB7	prolyl-tR synthetase	1.38984	0.282889	0.63964	6.45771	0.0144472	0.0470548	2.21849	0.101565	1	3.84878	0.0107944	0.0281027	Enriched GUL-1-GFP	Enriched GUL-1-GFP
NCU07277	Q7S939	anchored cell wall protein 8	1.39074	0.00297289	0.0675453	1.78894	0.00347731	0.0237648	0.381134	0.372296	1	3.28353	1.21376e-11	4.77025e-10	Enriched GUL-1-GFP	Enriched GUL-1-GFP
NCU03393	Q01291	ribosome-associated protein	1.39886	0.0410568	0.259982	7.91199	0.000344934	0.00490358	0.249242	0.682073	1	2.6689	0.000345363	0.00199566	Enriched GUL-1-GFP	Enriched GUL-1-GFP
NCU07962	Q7S923	hypothetical protein	1.40328	0.125388	0.454843	7.02327	0.00270671	0.020732	0.721152	0.377579	1	4.38046	0.000387086	0.00219476	Enriched GUL-1-GFP	Enriched GUL-1-GFP
NCU05208	Q7S9C5	hypothetical protein	1.40416	0.0575616	0.310338	5.59963	0.0110857	0.0416477	1.28763	0.0572518	1	5.81498	0.00024979	0.00157029	Enriched GUL-1-GFP	Enriched GUL-1-GFP
NCU00971	Q7SGF1	ribosomal protein S12	1.40552	0.0672782	0.336869	19.666	2.36843e-18	8.41741e-16	0.301128	0.656273	1	3.99907	0.000125883	0.000937973	Enriched GUL-1-GFP	Enriched GUL-1-GFP
NCU08772	Q1K4U8	cyclin-dependent protein kise complex component	1.40881	0.0227142	0.197105	2.05556	0.0140198	0.0462639	0.195403	0.688413	1	2.71615	5.57926e-06	7.58621e-05	Enriched GUL-1-GFP	Enriched GUL-1-GFP
NCU07947	Q7S937	glycolipid transfer protein HET-C2	1.40981	0.0801614	0.365422	7.23795	0.00135774	0.0131125	0.242021	0.730071	1	3.28488	0.00105024	0.00472648	Enriched GUL-1-GFP	Enriched GUL-1-GFP
NCU03145	Q7SDU7	oxidative stress resistance	1.41513	0.0604603	0.317398	7.21171	0.0010635	0.0109357	0.694344	0.250623	1	3.21421	3.63756e-05	0.000350796	Enriched GUL-1-GFP	Enriched GUL-1-GFP
NCU02137	Q7SE39	phosphatidylinositol:UDP-Glcc transferase PIG-C	1.42228	0.101989	0.410874	6.66267	0.00338631	0.0235063	1.30905	0.0912958	1	5.35504	3.4661e-05	0.00033824	Enriched GUL-1-GFP	Enriched GUL-1-GFP
NCU01552	Q9HE74	ribosomal protein S28	1.42242	0.0441581	0.271239	6.54199	0.00306124	0.0225711	-0.382188	0.526341	1	0.84697	0.25543	0.337553	Enriched GUL-1-GFP
NCU05410	Q9P3I3	acetylornithine aminotransferase	1.42336	0.161561	0.510472	7.39172	0.00219465	0.0178894	0.370947	0.720097	1	4.4624	0.000213247	0.00138261	Enriched GUL-1-GFP	Enriched GUL-1-GFP
NCU07562	Q7S1Z1	60S ribosomal protein L43	1.42432	0.0706518	0.344953	6.29251	0.00511522	0.0295055	-0.0958302	0.886479	1	6.49803	6.33602e-05	0.000549186	Enriched GUL-1-GFP	Enriched GUL-1-GFP
NCU02571	Q7SHP4	acetyl-CoA acetyltransferase	1.42528	0.0600613	0.316482	3.38365	0.00454517	0.0274803	0.439395	0.539562	1	2.30023	0.00416005	0.0135473	Enriched GUL-1-GFP	Enriched GUL-1-GFP
NCU00078	Q7RX72	hypothetical protein	1.42884	0.292718	0.648678	7.1073	0.00650971	0.0330036	0.506317	0.671147	1	5.7302	0.00309616	0.0107737	Enriched GUL-1-GFP	Enriched GUL-1-GFP
NCU03972	Q7RZ97	proteasome regulatory particle	1.43217	0.0898075	0.386877	5.91802	0.00910206	0.0384646	0.308682	0.674636	1	6.30855	0.000123136	0.000922396	Enriched GUL-1-GFP	Enriched GUL-1-GFP
NCU00811	Q7SEC3	hypothetical protein	1.43242	0.0102436	0.127833	7.94585	1.14974e-27	1.36206e-24	0.334949	0.50072	1	8.99712	3.80827e-54	4.37037e-51	Enriched GUL-1-GFP	Enriched GUL-1-GFP
NCU06851	Q1K8K3	hypothetical protein	1.43514	0.0580805	0.311878	5.61489	0.0107332	0.0410612	0.618748	0.329802	1	5.80978	0.000245727	0.00155734	Enriched GUL-1-GFP	Enriched GUL-1-GFP
NCU09219	Q7S3A1	dopey domain-containing protein	1.43691	0.0677838	0.337914	6.42108	0.00413446	0.0261013	0.425489	0.543843	1	3.12555	0.000867847	0.00409164	Enriched GUL-1-GFP	Enriched GUL-1-GFP
NCU02379	Q7S4U8	mutagen sensitive-10 protein	1.43915	0.100472	0.40936	5.54649	0.0152804	0.0486181	0.627476	0.405151	1	5.7185	0.000565802	0.00297033	Enriched GUL-1-GFP	Enriched GUL-1-GFP
NCU10381	A7UW29	oligonucleotide transporter	1.44025	0.0396692	0.255163	6.93537	0.00161384	0.0147332	0.301724	0.618473	1	2.7296	0.000403492	0.00226762	Enriched GUL-1-GFP	Enriched GUL-1-GFP
NCU02978	V5IR80	cytoskeleton assembly control protein SLA1p	1.44065	0.0210472	0.188213	2.72148	0.00782712	0.0358013	0.29285	0.583713	1	3.08962	2.45774e-05	0.000258288	Enriched GUL-1-GFP	Enriched GUL-1-GFP
NCU03551	Q1K4M6	hypothetical protein	1.44332	0.0519808	0.294071	5.63431	0.00938616	0.039036	0.103915	0.852493	1	2.62113	0.00469023	0.0147787	Enriched GUL-1-GFP	Enriched GUL-1-GFP
NCU04692	Q7S5T9	hypothetical protein	1.44741	0.181267	0.537569	5.87448	0.0151304	0.0483573	1.2182	0.225476	1	6.15881	0.000506543	0.00271133	Enriched GUL-1-GFP	Enriched GUL-1-GFP
NCU02534	P22142	DH:ubiquinone oxidoreductase 49kD subunit	1.44933	0.0657484	0.334232	5.97294	0.00718847	0.0347224	-0.266045	0.687069	1	2.60172	0.00610697	0.0182155	Enriched GUL-1-GFP	Enriched GUL-1-GFP
NCU01454	A3RNH6	mitochondrial hydrolase	1.45022	0.0534293	0.299063	5.60632	0.0108419	0.0411692	0.160549	0.791013	1	6.41822	5.02767e-05	0.000456468	Enriched GUL-1-GFP	Enriched GUL-1-GFP
NCU07293	Q7S974	hypothetical protein	1.45212	0.00467677	0.0882324	4.66127	4.20944e-08	1.52657e-06	0.33349	0.446807	1	3.25762	3.88087e-10	1.31766e-08	Enriched GUL-1-GFP	Enriched GUL-1-GFP
NCU09929	Q1K645	hypothetical protein	1.45252	0.0846207	0.374457	9.14091	4.76722e-05	0.00103943	0.111659	0.872777	1	9.74566	1.96108e-09	6.07112e-08	Enriched GUL-1-GFP	Enriched GUL-1-GFP
NCU06734	Q1K8U8	hypothetical protein	1.45351	0.0570691	0.309594	6.03655	0.00648114	0.0329641	0.215729	0.730736	1	5.96258	0.000192348	0.00127724	Enriched GUL-1-GFP	Enriched GUL-1-GFP
NCU03097	Q7SCZ0	nucleotide-sugar transporter	1.45934	0.101382	0.410053	5.77087	0.011149	0.0417969	-0.084487	0.907788	1	6.10852	0.00020859	0.00136165	Enriched GUL-1-GFP	Enriched GUL-1-GFP
NCU05411	Q1K8R3	pathway-specific nitrogen regulator	1.45983	0.0986848	0.405683	5.61745	0.0134932	0.0457347	0.923921	0.230414	1	5.89142	0.000348829	0.00201282	Enriched GUL-1-GFP	Enriched GUL-1-GFP
NCU00420	U9WH02	hypothetical protein	1.46603	0.0903618	0.386899	7.68268	0.000826293	0.00938225	0.760751	0.314588	1	7.64566	4.53126e-06	6.41984e-05	Enriched GUL-1-GFP	Enriched GUL-1-GFP
NCU03878	Q7RXH2	hypothetical protein	1.46724	0.105958	0.414994	6.23589	0.00576883	0.0313973	-0.405516	0.564466	1	3.55696	0.00170638	0.00678385	Enriched GUL-1-GFP	Enriched GUL-1-GFP
NCU11367	A7UX33	inositol phospholipid biosynthesis protein Scs3	1.47038	0.0234496	0.199423	8.08471	0.000194345	0.00332516	0.277447	0.616353	1	3.2556	2.09509e-06	3.25789e-05	Enriched GUL-1-GFP	Enriched GUL-1-GFP
NCU04753	Q7S6A0	DH:ubiquinone oxidoreductase 11.6kD subunit	1.47056	0.101554	0.410293	6.69656	0.00349049	0.0237648	-0.208159	0.783167	1	5.96338	0.00034044	0.00196999	Enriched GUL-1-GFP	Enriched GUL-1-GFP
NCU01692	P34085	mitochondrial citrate synthase	1.47479	0.0183827	0.177303	2.5699	0.007254	0.0347224	0.574541	0.310509	1	8.32583	9.65427e-08	2.15549e-06	Enriched GUL-1-GFP	Enriched GUL-1-GFP
NCU09598	Q873L8	mitochondrial escape protein 2	1.47496	0.0602039	0.316839	6.88029	0.00198299	0.0168061	1.38338	0.0472657	1	1.94603	0.0136607	0.0338122	Enriched GUL-1-GFP	Enriched GUL-1-GFP
NCU08000	Q7SAP0	cutise transcription factor 1 alpha	1.47839	0.0960269	0.399026	5.70061	0.012562	0.0443532	0.56219	0.451213	1	5.80999	0.000452431	0.00247478	Enriched GUL-1-GFP	Enriched GUL-1-GFP
NCU03727	V5IL46	hyphal astamosis protein 2, variant	1.48345	0.0707701	0.344953	5.44183	0.0156265	0.0489742	0.965667	0.182593	1	5.52803	0.000686653	0.00343806	Enriched GUL-1-GFP	Enriched GUL-1-GFP
NCU01793	Q1K554	R binding domain-containing protein	1.48689	0.0169796	0.16844	7.79759	0.000279363	0.00423688	0.903926	0.0835993	1	4.8015	7.7501e-08	1.76468e-06	Enriched GUL-1-GFP	Enriched GUL-1-GFP
NCU06483	Q7RYJ1	F-box and WD repeat-containing protein	1.49827	0.0574282	0.310338	6.94942	0.00182443	0.0160099	0.4425	0.494174	1	7.72713	1.54372e-06	2.53807e-05	Enriched GUL-1-GFP	Enriched GUL-1-GFP
NCU06812	V5IR07	DDHD domain-containing protein	1.4987	0.07861	0.363067	5.99131	0.00852621	0.0373683	0.657645	0.380307	1	2.14906	0.0236137	0.0509381	Enriched GUL-1-GFP
NCU01702	Q7RVQ2	nuclear pore protein	1.49966	0.0978238	0.403559	5.58504	0.015378	0.0487543	0.000765177	0.999244	1	3.53504	0.00295298	0.0103888	Enriched GUL-1-GFP	Enriched GUL-1-GFP
NCU09986	Q7S140	hypothetical protein	1.51171	0.0190049	0.180078	2.66128	0.00281741	0.0213345	-0.127841	0.814807	1	1.35369	0.0300124	0.0607233	Enriched GUL-1-GFP
NCU06761	Q1K8S9	sphingosine-1-phosphate lyase	1.5168	0.0383821	0.251477	6.51269	0.00306983	0.0225711	0.294878	0.628317	1	3.22533	0.000240508	0.00153167	Enriched GUL-1-GFP	Enriched GUL-1-GFP
NCU06091	Q7S481	vacuolar protein sorting-associated protein 74	1.52638	0.0249781	0.206708	5.47609	0.0111014	0.0416624	-0.256582	0.630018	1	5.37883	0.000506272	0.00271133	Enriched GUL-1-GFP	Enriched GUL-1-GFP
NCU06668	Q1K6Y8	hypothetical protein	1.52721	0.0799714	0.365361	6.04238	0.00706809	0.0343296	0.38828	0.586475	1	7.09584	1.18357e-05	0.000140316	Enriched GUL-1-GFP	Enriched GUL-1-GFP
NCU16405	V5IRM9	hypothetical protein	1.53444	0.0646646	0.330039	8.53928	0.000216219	0.0035786	2.27335	0.00350203	0.730506	8.54769	3.42336e-07	6.68138e-06	Enriched GUL-1-GFP	Enriched GUL-1-GFP
NCU00900	Q7SCV4	hypothetical protein	1.53544	0.0484289	0.283476	5.39679	0.0152534	0.0486049	0.386297	0.544634	1	5.55791	0.000534867	0.00283648	Enriched GUL-1-GFP	Enriched GUL-1-GFP
NCU00401	U9W8L7	hypothetical protein, variant	1.53825	0.10188	0.410874	5.745	0.0126542	0.044396	0.0779706	0.919919	1	2.50937	0.0150673	0.0364333	Enriched GUL-1-GFP	Enriched GUL-1-GFP
NCU06950	Q7S0X4	hypothetical protein	1.53954	0.0466296	0.279306	5.3033	0.0155626	0.048915	0.786267	0.224822	1	0.76056	0.316923	0.402146	Enriched GUL-1-GFP
NCU01782	Q7RYJ8	Ras guanyl-nucleotide exchange factor RasGEF	1.54055	0.00818789	0.116469	6.71651	0.00164248	0.0148912	0.731331	0.132175	1	1.45191	0.0125149	0.0315651	Enriched GUL-1-GFP	Enriched GUL-1-GFP
NCU05753	Q7S4R9	ESCRT-I component	1.54302	0.0311406	0.229268	2.43355	0.0154897	0.048847	0.00250677	0.996729	1	2.52438	0.000466165	0.00253482	Enriched GUL-1-GFP	Enriched GUL-1-GFP
NCU04259	Q7RVU8	ubiquinone biosynthesis protein	1.54416	0.163543	0.513472	5.97432	0.0136902	0.0458908	0.236957	0.804903	1	6.31119	0.000378332	0.00215792	Enriched GUL-1-GFP	Enriched GUL-1-GFP
NCU14019	#N/A		1.54461	0.153984	0.497886	19.5748	3.25153e-15	3.98481e-13	-1.2541	0.211721	1	24.6341	1.85271e-41	5.5952e-39	Enriched GUL-1-GFP	Enriched GUL-1-GFP
NCU07776	Q1K686	anchored cell wall protein 5	1.54486	0.00983771	0.125602	8.48761	7.9209e-05	0.00161787	0.0771392	0.876355	1	8.70499	1.56931e-08	4.28795e-07	Enriched GUL-1-GFP	Enriched GUL-1-GFP
NCU04729	V5ILB3	hypothetical protein	1.54666	0.109842	0.422763	5.96942	0.0112856	0.0420566	0.705814	0.407721	1	5.81749	0.000712102	0.00354576	Enriched GUL-1-GFP	Enriched GUL-1-GFP
NCU04202	Q9UUY8	nucleoside diphosphate kise	1.54823	0.179119	0.535533	6.92537	0.0059663	0.0318861	1.14437	0.285618	1	1.87098	0.136181	0.201342	Enriched GUL-1-GFP
NCU03880	Q7RXH0	phosphorylcholine transferase	1.55014	0.0675824	0.337768	5.89804	0.00886845	0.0378828	0.271231	0.696824	1	0.00974841	0.991073	0.997855	Enriched GUL-1-GFP
NCU09538	Q7S2C3	microsomal dipeptidase	1.56638	0.0481358	0.282924	5.4243	0.0139332	0.0462359	0.48706	0.429011	1	6.30471	7.15427e-05	0.000606369	Enriched GUL-1-GFP	Enriched GUL-1-GFP
NCU01953	Q7SDY4	AMI1 protein	1.57514	0.00807637	0.116469	3.92014	1.45222e-06	4.12896e-05	0.137921	0.793431	1	4.57607	4.47922e-13	2.02376e-11	Enriched GUL-1-GFP	Enriched GUL-1-GFP
NCU06939	Q7S0H7	endosome-associated ubiquitin isopeptidase	1.58128	0.012404	0.144642	7.53342	0.00052576	0.00686967	0.967603	0.0764143	1	1.36493	0.0390217	0.0743782	Enriched GUL-1-GFP
NCU02211	Q7S461	hypothetical protein	1.58562	0.020319	0.185861	5.7193	7.84258e-10	3.92571e-08	0.48853	0.405866	1	6.81347	1.4158e-21	1.23088e-19	Enriched GUL-1-GFP	Enriched GUL-1-GFP
NCU00023	Q7RY82	ferric reductase	1.58657	0.0150522	0.160632	4.7854	7.61614e-09	3.11124e-07	0.271429	0.620403	1	7.16796	2.19831e-21	1.85498e-19	Enriched GUL-1-GFP	Enriched GUL-1-GFP
NCU01985	Q7SE75	sulfate adenylyltransferase	1.58693	0.0585764	0.314142	6.60874	0.00368503	0.0244339	-0.134381	0.854262	1	2.86856	0.00241207	0.00891208	Enriched GUL-1-GFP	Enriched GUL-1-GFP
NCU01737	F5HG24	hypothetical protein	1.58702	0.0191725	0.180452	6.97977	0.00123375	0.0122845	0.336047	0.535469	1	5.00233	6.16932e-07	1.13825e-05	Enriched GUL-1-GFP	Enriched GUL-1-GFP
NCU03023	Q7SGZ3	phenol 2-monooxygese	1.58735	0.00907525	0.12214	2.61181	0.00372932	0.0246357	0.431594	0.416771	1	2.36067	0.00032455	0.0018964	Enriched GUL-1-GFP	Enriched GUL-1-GFP
NCU02234	V5IKG9	MAP kise kise kise	1.5899	0.0164564	0.165909	3.72035	6.70198e-05	0.0014094	0.590534	0.31164	1	3.93553	5.53255e-09	1.59526e-07	Enriched GUL-1-GFP	Enriched GUL-1-GFP
NCU06240	Q3Y3Z2	cAMP-dependent protein kise type 3	1.59014	0.0328439	0.233231	7.03175	0.00148491	0.0139613	0.642581	0.302436	1	2.12803	0.00458106	0.0145147	Enriched GUL-1-GFP	Enriched GUL-1-GFP
NCU00432	U9W3C2	hypothetical protein, variant	1.59084	0.00705756	0.111705	3.77071	3.37893e-07	1.08187e-05	0.495194	0.289966	1	5.90578	9.81625e-20	7.82301e-18	Enriched GUL-1-GFP	Enriched GUL-1-GFP
NCU08936	Q1K6S6	clock-controlled gene-15	1.59478	0.00431856	0.0841025	4.43059	5.75204e-09	2.37706e-07	0.423433	0.407199	1	4.58958	5.37591e-15	2.8562e-13	Enriched GUL-1-GFP	Enriched GUL-1-GFP
NCU02263	Q7S5A2	Sec14 cytosolic factor	1.59487	0.0475584	0.280309	5.80675	0.00940202	0.039036	0.367602	0.593623	1	5.43117	0.000777476	0.00379673	Enriched GUL-1-GFP	Enriched GUL-1-GFP
NCU06459	Q7RYW0	differentiation regulator	1.60224	0.00763233	0.113064	2.82173	0.000217672	0.00358151	0.820379	0.108425	1	6.14245	4.23195e-12	1.74697e-10	Enriched GUL-1-GFP	Enriched GUL-1-GFP
NCU06210	Q7SBB3	hypothetical protein	1.60355	0.0234532	0.199423	6.46424	0.00319445	0.0231223	-0.210763	0.713215	1	6.55415	3.23159e-05	0.000318606	Enriched GUL-1-GFP	Enriched GUL-1-GFP
NCU07974	Q7SAR4	endoglucase B	1.60633	0.0252283	0.207975	4.16841	2.63902e-06	7.32741e-05	0.116283	0.84542	1	5.5879	3.60348e-15	1.96921e-13	Enriched GUL-1-GFP	Enriched GUL-1-GFP
NCU06863	Q8J0U2	histone H1, variant	1.60665	0.0045242	0.0861227	7.22337	0.000749658	0.00873536	-0.106017	0.822506	1	1.70943	0.00554101	0.0168224	Enriched GUL-1-GFP	Enriched GUL-1-GFP
NCU03258	Q7RW03	oxysterol-binding protein	1.61082	0.0444606	0.272305	5.49422	0.0142298	0.0466539	-0.402955	0.546253	1	5.71699	0.000415531	0.00232616	Enriched GUL-1-GFP	Enriched GUL-1-GFP
NCU05791	V5IKI4	SOM1 protein	1.61205	0.00726359	0.112853	2.5213	0.00182009	0.0160099	0.390734	0.444027	1	4.92731	6.68052e-11	2.42613e-09	Enriched GUL-1-GFP	Enriched GUL-1-GFP
NCU08611	V5IQG0	rtg2-like protein	1.61233	0.0729249	0.350749	6.11058	0.00814036	0.0366213	0.800748	0.306341	1	1.11048	0.23215	0.311962	Enriched GUL-1-GFP
NCU03107	Q7SFY7	MFS transporter	1.61299	0.0471835	0.280309	6.50597	0.00334161	0.0235063	0.330144	0.612145	1	7.26017	5.50172e-06	7.53434e-05	Enriched GUL-1-GFP	Enriched GUL-1-GFP
NCU05591	Q7S6X2	ABC transporter CDR4	1.61498	0.058994	0.314784	6.15971	0.00708649	0.0343593	0.0377335	0.959661	1	3.60081	0.00094534	0.00437141	Enriched GUL-1-GFP	Enriched GUL-1-GFP
NCU03712	Q1K7Y8	hypothetical protein	1.62031	0.0302442	0.225418	5.58472	0.0101772	0.040278	1.29079	0.0259341	1	6.12921	8.51454e-05	0.000693983	Enriched GUL-1-GFP	Enriched GUL-1-GFP
NCU00311	Q7RZQ3	VTS1, variant	1.62071	0.00798525	0.116364	9.68085	6.87216e-06	0.000170795	0.697438	0.178091	1	6.31124	2.43405e-16	1.45485e-14	Enriched GUL-1-GFP	Enriched GUL-1-GFP
NCU06637	V5IMJ5	peroxin-24 Pex24-Penicillium chrysogenum, variant	1.63238	0.0515899	0.29225	5.67232	0.0119808	0.0432124	0.883826	0.21439	1	5.9856	0.000247423	0.00156184	Enriched GUL-1-GFP	Enriched GUL-1-GFP
NCU06390	Q7S9F7	hypothetical protein	1.63615	0.157497	0.503849	6.74853	0.00668579	0.0334096	1.24239	0.241604	1	2.73814	0.0285782	0.0585126	Enriched GUL-1-GFP
NCU03217	Q7SGV2	MRS7 family protein	1.63671	0.0342254	0.237399	2.91593	0.00837434	0.0369138	0.152381	0.808575	1	2.10756	0.00427426	0.0137862	Enriched GUL-1-GFP	Enriched GUL-1-GFP
NCU07745	Q7S1T3	hypothetical protein	1.6385	0.00735179	0.113064	2.28778	0.00603067	0.0320853	0.661175	0.223992	1	3.29329	6.41165e-07	1.1754e-05	Enriched GUL-1-GFP	Enriched GUL-1-GFP
NCU05254	Q7S889	ribose-phosphate pyrophosphokise	1.64007	0.074444	0.353881	6.44458	0.00574691	0.0313396	-0.129626	0.872225	1	7.41925	1.24145e-05	0.000145234	Enriched GUL-1-GFP	Enriched GUL-1-GFP
NCU04898	Q7S1D7	cation-transporting ATPase 4	1.64408	0.0508716	0.291305	6.5531	0.00407185	0.0259809	1.59271	0.0368493	1	2.38443	0.00935937	0.0252132	Enriched GUL-1-GFP	Enriched GUL-1-GFP
NCU01318	Q9C284	protein transporter sec-23	1.64584	0.0143958	0.155991	6.00459	0.00571457	0.0312937	1.32029	0.0242317	1	6.65332	1.9755e-05	0.000213876	Enriched GUL-1-GFP	Enriched GUL-1-GFP
NCU02712	Q7SH17	acetate kise	1.64715	0.104749	0.414098	6.06081	0.0116861	0.0428747	0.612368	0.506332	1	4.84106	0.00601726	0.0180016	Enriched GUL-1-GFP	Enriched GUL-1-GFP
NCU06652	Q1K6M8	S-(hydroxymethyl)glutathione dehydrogese	1.64747	0.0598266	0.315888	6.5112	0.00485453	0.0286595	-0.0429187	0.956413	1	7.03905	2.77448e-05	0.000281798	Enriched GUL-1-GFP	Enriched GUL-1-GFP
NCU00268	Q7RZU5	hypothetical protein	1.64799	0.050331	0.291255	6.8201	0.00207319	0.0170695	0.653673	0.304587	1	6.91785	1.45944e-05	0.000165828	Enriched GUL-1-GFP	Enriched GUL-1-GFP
NCU07707	Q7S9J9	hypothetical protein	1.64867	0.0435963	0.269748	6.63919	0.00295038	0.0220737	0.636263	0.359476	1	7.32116	5.54829e-06	7.57211e-05	Enriched GUL-1-GFP	Enriched GUL-1-GFP
NCU08110	Q7SCX0	vacuolar transporter chaperone 4	1.6498	0.0350561	0.240646	5.89868	0.00820063	0.0367844	0.537013	0.416142	1	1.32517	0.113566	0.173911	Enriched GUL-1-GFP
NCU00413	Q7RVQ9	60S ribosomal protein L2	1.65043	0.00714428	0.112237	2.61752	0.0036724	0.0243957	0.679852	0.203411	1	2.19687	0.000625788	0.00320033	Enriched GUL-1-GFP	Enriched GUL-1-GFP
NCU04840	Q7S6J5	autophagy protein Atg13	1.65467	0.0289576	0.219774	7.59748	0.000611438	0.00759808	1.25671	0.0584945	1	5.4575	4.04578e-08	9.92081e-07	Enriched GUL-1-GFP	Enriched GUL-1-GFP
NCU03686	V5IL43	oxidase assembly protein 2	1.6568	0.0169021	0.168188	7.53442	4.36784e-16	8.62406e-14	0.414373	0.525157	1	9.27643	9.20135e-37	1.8206e-34	Enriched GUL-1-GFP	Enriched GUL-1-GFP
NCU07866	Q7SBU3	DEAD helicase superfamily protein	1.65682	0.0676176	0.337768	5.5738	0.0142804	0.0466938	0.29341	0.692746	1	2.39164	0.0259702	0.054525	Enriched GUL-1-GFP
NCU01754	Q9P6C8	alcohol dehydrogese I	1.66013	0.00536287	0.0952248	2.1161	0.00983035	0.0396562	-0.0904423	0.875007	1	0.985075	0.125721	0.188845	Enriched GUL-1-GFP
NCU08606	V5IRB8	cell cycle inhibitor Nif1	1.66083	0.0692668	0.343167	9.13863	8.16637e-05	0.00165847	1.1015	0.164823	1	6.35608	1.63081e-09	5.08564e-08	Enriched GUL-1-GFP	Enriched GUL-1-GFP
NCU02736	V5IPB2	hypothetical protein	1.66311	0.0306522	0.227581	6.93724	0.00197034	0.0167526	-0.125733	0.85256	1	6.40972	7.60442e-05	0.000636995	Enriched GUL-1-GFP	Enriched GUL-1-GFP
NCU07697	Q7S9K8	isocitrate dehydrogese subunit 2	1.66436	0.0403339	0.258651	4.10575	0.000280154	0.00423688	0.534101	0.454487	1	5.93813	5.00446e-10	1.68915e-08	Enriched GUL-1-GFP	Enriched GUL-1-GFP
NCU06596	Q7S9R9	hypothetical protein	1.66775	0.0340336	0.236556	6.33491	0.00379694	0.0249433	0.764275	0.23137	1	7.36305	2.83468e-06	4.20294e-05	Enriched GUL-1-GFP	Enriched GUL-1-GFP
NCU09316	Q7SDF5	hypothetical protein	1.66873	0.00746446	0.113064	6.13111	3.80709e-07	1.20807e-05	0.787229	0.106267	1	5.30919	7.99626e-16	4.49829e-14	Enriched GUL-1-GFP	Enriched GUL-1-GFP
NCU06250	Q7SBQ7	F-box/LRR repeat containing protein 2	1.6692	0.0497221	0.28904	5.73589	0.00966374	0.0394761	0.343492	0.60019	1	0.51975	0.530832	0.614186	Enriched GUL-1-GFP
NCU06685	V5IMK9	protein kise	1.67901	0.0311387	0.229268	5.8596	0.00831094	0.0368182	0.0824487	0.897042	1	6.73245	2.58208e-05	0.000266474	Enriched GUL-1-GFP	Enriched GUL-1-GFP
NCU00040	Q7RWT1	eukaryotic translation initiation factor 3 110 kDa subunit	1.68352	0.0257844	0.210075	2.66852	0.00886532	0.0378828	1.01942	0.144646	1	2.87845	0.000196273	0.00129898	Enriched GUL-1-GFP	Enriched GUL-1-GFP
NCU04024	Q1K606	hypothetical protein	1.69244	0.0205629	0.186879	6.20641	0.00461243	0.0276182	-0.00219897	0.997061	1	1.49199	0.0460049	0.0847435	Enriched GUL-1-GFP
NCU06432	Q7RV74	40S ribosomal protein S12	1.69298	0.00998656	0.125759	2.63419	0.012432	0.0440512	0.482831	0.379206	1	7.10651	5.66995e-06	7.67315e-05	Enriched GUL-1-GFP	Enriched GUL-1-GFP
NCU08343	Q7SGS0	RGS domain-containing protein	1.69853	0.0054641	0.0961737	3.33681	5.19287e-06	0.000135702	0.203421	0.65967	1	6.01035	2.58744e-16	1.53059e-14	Enriched GUL-1-GFP	Enriched GUL-1-GFP
NCU05527	Q7S6R3	hypothetical protein	1.69919	0.0838696	0.371913	6.56689	0.00533642	0.0301143	0.32799	0.702859	1	1.0076	0.314936	0.400333	Enriched GUL-1-GFP
NCU04921	Q7S3U6	DUF1295 domain-containing protein	1.70431	0.0143158	0.155991	6.53835	0.00269894	0.0207172	-0.578647	0.302584	1	1.00455	0.159167	0.22884	Enriched GUL-1-GFP
NCU09649	V5IM44	metallophosphoesterase	1.7091	0.0748879	0.354794	5.96291	0.00884446	0.0378714	0.616205	0.420006	1	2.45701	0.0135771	0.0336814	Enriched GUL-1-GFP	Enriched GUL-1-GFP
NCU00771	Q7SFV8	UBX domain-containing protein 7	1.71209	0.0523165	0.29518	5.88079	0.01026	0.040313	0.428838	0.578657	1	2.76286	0.0118052	0.0301998	Enriched GUL-1-GFP	Enriched GUL-1-GFP
NCU05153	Q1K589	carbohydrate O-acetyltransferase	1.72223	0.00216018	0.0553267	2.41498	0.000921961	0.0101444	0.55787	0.256328	1	6.21853	4.7459e-12	1.94514e-10	Enriched GUL-1-GFP	Enriched GUL-1-GFP
NCU09237	Q7SCU3	KH domain R binding protein	1.72232	0.00812457	0.116469	8.17219	0.000173788	0.00305764	1.048	0.0565744	1	8.48619	5.60054e-08	1.31167e-06	Enriched GUL-1-GFP	Enriched GUL-1-GFP
NCU16776	V5IM14	hypothetical protein	1.72259	0.0956459	0.398166	6.127	0.00971907	0.0394761	0.699501	0.433617	1	6.50088	0.000170508	0.00116059	Enriched GUL-1-GFP	Enriched GUL-1-GFP
NCU07388	Q7S2H4	hypothetical protein	1.72818	0.00659681	0.107638	2.41953	0.00211075	0.0172848	0.108433	0.827128	1	3.16958	2.04882e-07	4.18367e-06	Enriched GUL-1-GFP	Enriched GUL-1-GFP
NCU01776	Q8X034	60S ribosomal protein L15	1.72884	0.0130571	0.147287	2.42722	0.0143091	0.0467412	0.671635	0.261707	1	8.34475	1.38071e-07	2.98962e-06	Enriched GUL-1-GFP	Enriched GUL-1-GFP
NCU00219	Q7RXK8	hypothetical protein	1.73355	0.0709653	0.345387	6.73223	0.00431088	0.0265552	0.642324	0.465586	1	2.07858	0.0374276	0.0720427	Enriched GUL-1-GFP
NCU05902	Q7S403	vacuolar assembly protein	1.73903	0.00847107	0.117759	6.6801	0.00208623	0.0171234	0.914906	0.108116	1	2.69788	0.000371964	0.00213007	Enriched GUL-1-GFP	Enriched GUL-1-GFP
NCU05220	Q7S8I6	ATP synthase subunit F	1.74857	0.0412181	0.259982	5.36978	0.0148352	0.0477258	0.113524	0.856075	1	5.12268	0.00126355	0.00541163	Enriched GUL-1-GFP	Enriched GUL-1-GFP
NCU01410	Q1K6U4	DUF1711 domain-containing protein	1.75777	0.0526218	0.296112	5.60695	0.0131394	0.0450747	0.22781	0.752028	1	2.10067	0.0305813	0.0616568	Enriched GUL-1-GFP
NCU01740	Q9P534	histone H2A.Z-specific chaperone chz-1	1.75902	0.0469077	0.279306	7.25913	0.00164191	0.0148912	-0.0339058	0.964892	1	6.92119	3.58734e-05	0.000347119	Enriched GUL-1-GFP	Enriched GUL-1-GFP
NCU07548	Q7S301	hypothetical protein	1.76068	0.0418238	0.261888	5.46213	0.0155664	0.048915	0.485237	0.490335	1	2.09865	0.0359917	0.069794	Enriched GUL-1-GFP
NCU01475	Q6MW04	hypothetical protein	1.76185	0.0337436	0.235703	5.5724	0.0122217	0.0437861	0.463666	0.476304	1	1.80092	0.0378258	0.0725658	Enriched GUL-1-GFP
NCU02354	Q7S4X1	RSC complex subunit	1.76908	0.0229346	0.198311	5.73652	0.00992455	0.0399003	0.796621	0.232472	1	6.17635	0.000118648	0.000894612	Enriched GUL-1-GFP	Enriched GUL-1-GFP
NCU03333	Q7RXE9	tyrosine phosphatase	1.77429	0.00815946	0.116469	3.41487	0.000448702	0.00606345	0.405826	0.492709	1	1.81528	0.00825527	0.0229167	Enriched GUL-1-GFP	Enriched GUL-1-GFP
NCU06226	Q7SBS9	60S ribosomal protein L25	1.77955	0.0217465	0.192261	6.142	0.00592266	0.0317963	0.18866	0.770205	1	2.30159	0.0132202	0.0330102	Enriched GUL-1-GFP	Enriched GUL-1-GFP
NCU03220	V5IPX0	hypothetical protein, variant 2	1.78689	0.0102545	0.127833	6.26167	0.00419155	0.0261806	0.457327	0.426317	1	0.38436	0.573297	0.653213	Enriched GUL-1-GFP
NCU08457	Q04571	rodlet protein	1.78824	0.346637	0.696901	19.8609	2.8093e-09	1.28003e-07	0.971338	0.604001	1	18.6129	2.81507e-13	1.29223e-11	Enriched GUL-1-GFP	Enriched GUL-1-GFP
NCU07253	Q7S962	1,3-beta-glucanosyltransferase gel1	1.79107	0.00191752	0.0516686	4.14383	3.73667e-06	0.000100607	0.217289	0.653154	1	4.32593	9.78807e-13	4.3203e-11	Enriched GUL-1-GFP	Enriched GUL-1-GFP
NCU09477	P02723	ADP/ATP carrier protein, variant	1.7928	0.0173945	0.170555	2.63044	0.0102484	0.040313	0.584754	0.39792	1	2.16726	0.00535051	0.0164178	Enriched GUL-1-GFP	Enriched GUL-1-GFP
NCU09326	Q7SD58	hypothetical protein	1.79327	0.00338739	0.0730363	5.9573	1.3014e-13	1.05118e-11	0.00399933	0.994326	1	7.47794	8.78331e-32	1.39996e-29	Enriched GUL-1-GFP	Enriched GUL-1-GFP
NCU08411	V5IPP8	aspartate aminotransferase, variant	1.80376	0.00548459	0.0961737	3.16857	0.00106464	0.0109357	0.471306	0.421556	1	2.34541	0.000426238	0.00236762	Enriched GUL-1-GFP	Enriched GUL-1-GFP
NCU04951	Q7S3R6	hypothetical protein	1.811	0.0508669	0.291305	7.91128	0.00076516	0.00885791	0.74311	0.369804	1	1.47738	0.12697	0.190572	Enriched GUL-1-GFP
NCU03667	Q1K815	hypothetical protein	1.8157	0.0278195	0.214535	6.82246	0.00240863	0.0189506	0.471025	0.489978	1	1.5366	0.0590657	0.103077	Enriched GUL-1-GFP
NCU08889	V5ILV1	hypothetical protein	1.81805	0.00327214	0.0726337	3.29351	0.00116833	0.0118635	1.69935	0.00161612	0.544571	2.72428	3.11301e-05	0.000308505	Enriched GUL-1-GFP	Enriched GUL-1-GFP
NCU04270	Q7RVU7	hypothetical protein	1.82415	0.00274711	0.0637873	2.93756	0.000251488	0.0039724	1.6835	0.00159696	0.544571	4.03404	2.94855e-10	1.0131e-08	Enriched GUL-1-GFP	Enriched GUL-1-GFP
NCU05343	V5IP92	R3H domain-containing protein	1.82855	0.0360196	0.243028	6.55936	0.00385407	0.0252719	0.694005	0.353665	1	6.92483	2.5127e-05	0.000262143	Enriched GUL-1-GFP	Enriched GUL-1-GFP
NCU04050	P11115	cross-pathway control protein 1	1.83755	0.00191954	0.0516686	3.99323	4.35496e-06	0.000115504	0.789804	0.133477	1	3.08792	8.83977e-07	1.57524e-05	Enriched GUL-1-GFP	Enriched GUL-1-GFP
NCU07153	Q1K5Y1	glutamate carboxypeptidase	1.84135	0.0189231	0.179706	6.77672	0.00230272	0.0184738	0.369626	0.581293	1	1.8443	0.0181952	0.0420163	Enriched GUL-1-GFP	Enriched GUL-1-GFP
NCU00644	Q7SI08	ATP synthase subunit G	1.8484	0.0159531	0.164148	6.70254	0.00235	0.0187628	0.488352	0.428647	1	2.60126	0.00117175	0.00510906	Enriched GUL-1-GFP	Enriched GUL-1-GFP
NCU07874	Q7SAS0	nuclear and cytoplasmic polyadenylated R-binding protein pub1	1.85755	0.00524696	0.0951658	2.32837	0.00939759	0.039036	0.168564	0.764793	1	2.83724	2.62122e-05	0.000270028	Enriched GUL-1-GFP	Enriched GUL-1-GFP
NCU04237	Q7RVD1	phosphopantothenoylcysteine decarboxylase	1.87696	0.0155756	0.163046	5.50474	0.0117235	0.0428961	-0.462576	0.41385	1	6.44475	3.98135e-05	0.000380116	Enriched GUL-1-GFP	Enriched GUL-1-GFP
NCU03675	Q7S7Y9	hypothetical protein	1.87966	0.0269243	0.21123	6.29992	0.00513787	0.0295055	0.243553	0.725609	1	2.91915	0.00133175	0.00563536	Enriched GUL-1-GFP	Enriched GUL-1-GFP
NCU06231	Q7SBS4	vacuolar amino acid transporter 1	1.88377	0.0165217	0.165909	2.75937	0.0115921	0.0426924	0.246719	0.708294	1	7.91346	9.77092e-07	1.71863e-05	Enriched GUL-1-GFP	Enriched GUL-1-GFP
NCU03573	Q1K4T1	hypothetical protein	1.885	0.0126143	0.145721	5.96902	0.00637395	0.0328175	1.33062	0.0457895	1	6.12081	0.000100055	0.000785385	Enriched GUL-1-GFP	Enriched GUL-1-GFP
NCU04771	V5IKU5	fructosyl-amino acid oxidase	1.88502	0.00969917	0.124966	3.37782	0.000517097	0.00678142	1.11048	0.0663842	1	4.61319	1.42936e-08	3.9431e-07	Enriched GUL-1-GFP	Enriched GUL-1-GFP
NCU00962	Q7SGG0	hypothetical protein, variant	1.88589	0.0069509	0.111607	2.75682	0.007473	0.0349461	0.726579	0.224568	1	3.65719	7.02675e-06	9.14274e-05	Enriched GUL-1-GFP	Enriched GUL-1-GFP
NCU06202	Q7SBC1	serine/threonine protein kise	1.90118	0.0095354	0.12399	5.95909	0.00639914	0.0328175	1.87943	0.00283154	0.707943	1.42368	0.0603871	0.104873	Enriched GUL-1-GFP
NCU03990	V5INA7	hypothetical protein, variant	1.90383	0.0157426	0.16346	6.58348	0.00306007	0.0225711	0.45564	0.477657	1	6.43213	6.03997e-05	0.000525909	Enriched GUL-1-GFP	Enriched GUL-1-GFP
NCU00340	Q1K623	transcription factor steA	1.90588	0.00634861	0.106389	3.16555	0.000285122	0.00428866	0.870455	0.136342	1	4.51825	1.44768e-09	4.53921e-08	Enriched GUL-1-GFP	Enriched GUL-1-GFP
NCU05313	Q7S8M1	mitochondria fission 1 protein	1.90691	0.0300572	0.22442	5.65666	0.0112715	0.0420566	-0.377858	0.567175	1	-0.312976	0.680852	0.748415	Enriched GUL-1-GFP
NCU07139	Q7S6B3	BEAK-2	1.90783	0.0230878	0.198311	7.1065	0.00138537	0.013307	2.20333	0.00648388	1	7.78208	1.18944e-06	2.01923e-05	Enriched GUL-1-GFP	Enriched GUL-1-GFP
NCU01589	Q1K566	heat shock protein 60	1.91563	0.0686746	0.341434	5.78352	0.0159452	0.0494228	-0.321579	0.733278	1	6.68322	0.000139376	0.00100994	Enriched GUL-1-GFP	Enriched GUL-1-GFP
NCU00003	Q7RYA2	hypothetical protein	1.92199	0.0472933	0.280309	5.76011	0.0117121	0.0428961	0.0888429	0.911819	1	6.20615	0.000179788	0.00120867	Enriched GUL-1-GFP	Enriched GUL-1-GFP
NCU01962	V5IP40	encodes anonymous transcript-5 protein, variant	1.92957	0.0249947	0.206708	5.83859	0.0101932	0.0402965	0.433765	0.551757	1	6.32964	0.000120145	0.000904716	Enriched GUL-1-GFP	Enriched GUL-1-GFP
NCU03855	V5IKZ2	CCR4-NOT transcription complex	1.93513	0.0166601	0.166838	6.12399	0.0061591	0.0322853	0.561954	0.395251	1	6.242	0.000110517	0.000847791	Enriched GUL-1-GFP	Enriched GUL-1-GFP
NCU07471	Q7SCP4	F-actin-capping protein subunit beta	1.93534	0.0427535	0.266092	5.98731	0.0103503	0.0405186	0.161878	0.846495	1	0.982535	0.310746	0.396235	Enriched GUL-1-GFP
NCU04790	V5IKM0	eukaryotic peptide chain release factor GTP-binding subunit	1.93612	0.0291547	0.220014	6.70338	0.00344367	0.0236719	0.389148	0.619247	1	2.63102	0.00530936	0.016309	Enriched GUL-1-GFP	Enriched GUL-1-GFP
NCU01597	Q1K563	hypothetical protein	1.93835	0.00872016	0.120429	5.86155	0.00743645	0.0348868	0.543654	0.36603	1	2.0026	0.0205381	0.045855	Enriched GUL-1-GFP	Enriched GUL-1-GFP
NCU09109	Q7S156	60S ribosomal protein L33	1.94131	0.0104158	0.129082	6.82699	0.00222908	0.0180871	-0.197512	0.759211	1	7.27351	6.34604e-06	8.39022e-05	Enriched GUL-1-GFP	Enriched GUL-1-GFP
NCU02407	Q7S477	dihydrolipoyl dehydrogese	1.95426	0.00215628	0.0553267	2.40728	0.00947069	0.0392328	0.920685	0.108768	1	3.51083	4.34719e-06	6.1743e-05	Enriched GUL-1-GFP	Enriched GUL-1-GFP
NCU02808	Q7SEK6	hypothetical protein	1.95508	0.0262717	0.21123	6.01402	0.00752953	0.0351642	1.03911	0.148667	1	5.93651	0.000264936	0.00163992	Enriched GUL-1-GFP	Enriched GUL-1-GFP
NCU16318	V5INY5	hypothetical protein	1.95787	0.0134393	0.14946	3.86932	0.000136157	0.00257395	1.69622	0.0145424	1	5.05693	4.43344e-11	1.66269e-09	Enriched GUL-1-GFP	Enriched GUL-1-GFP
NCU02785	P80576	phospho-2-dehydro-3-deoxyheptote aldolase	1.95925	0.00723577	0.112835	3.75719	0.000254362	0.00398239	0.250745	0.697204	1	3.93629	4.34516e-08	1.052e-06	Enriched GUL-1-GFP	Enriched GUL-1-GFP
NCU04762	Q7S691	hypothetical protein	1.96464	0.0115593	0.137993	5.64352	0.0102467	0.040313	0.347689	0.568451	1	5.21322	0.000996915	0.00456528	Enriched GUL-1-GFP	Enriched GUL-1-GFP
NCU05697	Q7SBP1	hypothetical protein	1.97072	0.0211444	0.188213	5.38709	0.0162399	0.049971	0.528731	0.451671	1	5.35548	0.000949976	0.00438533	Enriched GUL-1-GFP	Enriched GUL-1-GFP
NCU07846	U9W2W5	hypothetical protein	1.98677	0.0453548	0.274992	6.29904	0.00623866	0.032463	0.184892	0.81216	1	5.99423	0.000340577	0.00196999	Enriched GUL-1-GFP	Enriched GUL-1-GFP
NCU00137	U9W337	ssD binding protein, variant	1.99185	0.0736868	0.352662	6.24418	0.00767553	0.0354731	2.60484	0.0177119	1	3.66784	0.00159542	0.00643327	Enriched GUL-1-GFP	Enriched GUL-1-GFP
NCU02403	Q7S4N2	ubiquinone biosynthesis protein COQ9	1.99245	0.0260713	0.21123	5.57036	0.013057	0.0449657	0.726833	0.298998	1	2.28263	0.0158385	0.0378358	Enriched GUL-1-GFP	Enriched GUL-1-GFP
NCU02606	V5IRH4	hypothetical protein, variant	1.99317	0.0252464	0.207975	5.97471	0.00864678	0.0375221	0.116485	0.872777	1	6.12404	0.000203959	0.00133598	Enriched GUL-1-GFP	Enriched GUL-1-GFP
NCU06211	U9WGI5	malate dehydrogese	1.99374	0.0247353	0.205366	5.60808	0.0149757	0.0480357	0.717234	0.375331	1	5.93842	0.000389748	0.00220767	Enriched GUL-1-GFP	Enriched GUL-1-GFP
NCU06031	Q7S4F4	mitochondrial peroxiredoxin PRX1	1.99556	0.00235657	0.0580344	3.31679	0.00336244	0.0235063	1.28621	0.0271795	1	7.55437	1.37933e-06	2.30076e-05	Enriched GUL-1-GFP	Enriched GUL-1-GFP
NCU00687	Q7SHW7	hypothetical protein	1.99739	0.00626489	0.105902	3.81221	0.000317428	0.00468108	0.63764	0.310917	1	3.23743	1.45924e-05	0.000165828	Enriched GUL-1-GFP	Enriched GUL-1-GFP
NCU05347	Q873G4	histone H2A.Z	1.99802	0.0107639	0.13173	6.46362	0.00350364	0.0238087	0.433488	0.493965	1	6.74114	2.37754e-05	0.000250318	Enriched GUL-1-GFP	Enriched GUL-1-GFP
NCU08028	Q7SAL3	hypothetical protein	2.00576	0.0475196	0.280309	6.06084	0.00686644	0.034025	1.05391	0.167632	1	7.68959	2.02056e-06	3.18515e-05	Enriched GUL-1-GFP	Enriched GUL-1-GFP
NCU08637	V5IQG7	hypothetical protein	2.0098	0.0343357	0.237399	5.38157	0.0160654	0.0496058	0.702275	0.303104	1	1.9771	0.0250609	0.0529984	Enriched GUL-1-GFP
NCU00666	Q7SHY6	hypothetical protein	2.02396	0.00878303	0.120665	6.43691	0.00354273	0.0239499	0.25941	0.676107	1	6.42514	5.31413e-05	0.000477939	Enriched GUL-1-GFP	Enriched GUL-1-GFP
NCU00285	U9W510	hypothetical protein, variant	2.03936	0.0123446	0.14451	6.84667	0.00228743	0.0183926	0.436473	0.516884	1	1.56596	0.0725136	0.121697	Enriched GUL-1-GFP
NCU07960	Q7S925	MFS transporter	2.04207	0.00761934	0.113064	6.4434	0.00296883	0.0220737	1.0023	0.0627904	1	3.49456	0.000166069	0.00114394	Enriched GUL-1-GFP	Enriched GUL-1-GFP
NCU06273	Q7SB68	hypothetical protein	2.04816	0.0258385	0.210075	6.39577	0.0041679	0.0261013	1.1097	0.096486	1	6.60167	4.17995e-05	0.000395785	Enriched GUL-1-GFP	Enriched GUL-1-GFP
NCU07023	V5IMN4	LAlv9 family protein	2.05015	0.0154412	0.162827	5.7955	0.00971429	0.0394761	0.318003	0.654293	1	6.42971	7.11663e-05	0.000604966	Enriched GUL-1-GFP	Enriched GUL-1-GFP
NCU06111	Q7S5H7	GTPase Ras2p	2.06092	0.0058943	0.100847	4.4966	4.75046e-05	0.00103943	0.897928	0.161783	1	5.52362	2.05772e-07	4.18695e-06	Enriched GUL-1-GFP	Enriched GUL-1-GFP
NCU09754	Q7S0W3	mitochondrial chaperone Frataxin	2.06307	0.0168478	0.168188	7.44403	0.0008821	0.00982754	0.872133	0.20536	1	4.0579	7.431e-05	0.000626124	Enriched GUL-1-GFP	Enriched GUL-1-GFP
NCU02133	P07509	superoxide dismutase	2.06871	0.0143874	0.155991	6.20152	0.00591419	0.0317963	0.658198	0.353701	1	5.62457	0.000562905	0.00296054	Enriched GUL-1-GFP	Enriched GUL-1-GFP
NCU08389	V5IQT8	60S ribosomal protein L20, variant	2.06957	0.00564227	0.0978061	6.2758	0.00421497	0.0262807	0.0349385	0.952596	1	1.78697	0.0174602	0.0406273	Enriched GUL-1-GFP	Enriched GUL-1-GFP
NCU00021	Q7RY84	hypothetical protein	2.08566	0.0360573	0.243028	6.38258	0.00627246	0.0325436	-0.369279	0.677752	1	7.43518	1.21038e-05	0.000142904	Enriched GUL-1-GFP	Enriched GUL-1-GFP
NCU00775	Q7SFV4	isocitrate dehydrogese subunit 1	2.09425	0.00678191	0.110232	7.94232	0.000344396	0.00490358	0.516119	0.42477	1	8.49972	1.0647e-07	2.35878e-06	Enriched GUL-1-GFP	Enriched GUL-1-GFP
NCU01154	V5IL92	submerged protoperithecia-1, variant	2.10475	0.0129972	0.147287	7.26915	0.00123398	0.0122845	1.02802	0.13104	1	7.28752	7.43089e-06	9.59087e-05	Enriched GUL-1-GFP	Enriched GUL-1-GFP
NCU01559	Q1K4Y0	hypothetical protein	2.10628	0.0660276	0.334232	7.81069	0.00170446	0.0153311	1.13892	0.262594	1	8.76002	1.71937e-06	2.79482e-05	Enriched GUL-1-GFP	Enriched GUL-1-GFP
NCU08963	Q7S7F1	60S ribosomal protein L30	2.10743	0.00740803	0.113064	5.69584	0.00934092	0.039036	0.68921	0.23499	1	6.1842	8.66981e-05	0.000702647	Enriched GUL-1-GFP	Enriched GUL-1-GFP
NCU05291	Q7S907	polyamine acetyltransferase	2.11201	0.0115038	0.137993	8.91698	9.93331e-05	0.00198331	-0.0350718	0.962113	1	0.808368	0.333323	0.419892	Enriched GUL-1-GFP
NCU03118	Q7SFX6	hypothetical protein	2.11508	0.0124243	0.144642	6.66012	0.00348818	0.0237648	0.469598	0.52924	1	3.17608	0.000843495	0.00401991	Enriched GUL-1-GFP	Enriched GUL-1-GFP
NCU02514	P37211	mitochondrial ATP synthase alpha subunit	2.12687	0.00391746	0.0795921	8.35368	0.000185754	0.00323612	0.44171	0.504086	1	5.15842	3.15014e-08	8.03356e-07	Enriched GUL-1-GFP	Enriched GUL-1-GFP
NCU05805	Q7S5N8	serine hydroxymethyltransferase, variant	2.13632	0.00898187	0.121458	5.9679	0.00792047	0.0360889	-0.173371	0.80282	1	1.88126	0.0478969	0.0871931	Enriched GUL-1-GFP
NCU08738	Q7SCF7	MFS peptide transporter	2.15333	0.00936344	0.123003	6.65714	0.00282139	0.0213345	0.365727	0.568813	1	7.83215	1.1044e-06	1.90874e-05	Enriched GUL-1-GFP	Enriched GUL-1-GFP
NCU06203	Q7SBC0	hypothetical protein	2.16903	0.00952028	0.12399	4.78239	1.84971e-05	0.000435356	0.925937	0.215565	1	4.51452	1.72632e-07	3.62843e-06	Enriched GUL-1-GFP	Enriched GUL-1-GFP
NCU08793	U9W5H7	hypothetical protein, variant	2.1718	0.00702495	0.111607	5.736	0.00962759	0.0394654	0.218033	0.730329	1	5.36123	0.000797686	0.00384632	Enriched GUL-1-GFP	Enriched GUL-1-GFP
NCU03004	Q1K937	pyruvate dehydrogese E1 component	2.17224	0.00995491	0.125759	7.3002	0.00125246	0.012399	0.915832	0.212078	1	8.10238	7.40767e-07	1.3451e-05	Enriched GUL-1-GFP	Enriched GUL-1-GFP
NCU07495	Q7SG47	sphingolipid long chain base-responsive protein LSP1	2.18316	0.0133218	0.148936	6.5232	0.00404259	0.0259809	1.00366	0.174873	1	1.1176	0.182537	0.256109	Enriched GUL-1-GFP
NCU06189	Q7RVY5	5-aminolevulite synthase	2.18818	0.0267722	0.21123	11.6871	4.24156e-07	1.33403e-05	-0.0849539	0.917869	1	7.50625	6.99089e-16	3.97843e-14	Enriched GUL-1-GFP	Enriched GUL-1-GFP
NCU10014	Q7S0J2	hypothetical protein	2.20308	0.140698	0.481449	7.22763	0.00429361	0.0265382	0.353492	0.765686	1	8.78299	2.51739e-06	3.83093e-05	Enriched GUL-1-GFP	Enriched GUL-1-GFP
NCU02110	Q7RW00	DPH oxidase 1	2.2188	0.00729331	0.112899	6.60402	0.00232893	0.0186419	0.936654	0.0994597	1	7.47557	1.54283e-06	2.53807e-05	Enriched GUL-1-GFP	Enriched GUL-1-GFP
NCU01689	V5INA9	mitochondrial D replication protein YHM2	2.21997	0.00357601	0.0755611	7.1273	0.00130535	0.0127663	0.874804	0.193434	1	7.23409	5.97243e-06	8.00696e-05	Enriched GUL-1-GFP	Enriched GUL-1-GFP
NCU06556	F5HBN4	thioredoxin II	2.22831	0.00235698	0.0580344	6.0104	0.00610043	0.0321818	0.325565	0.57891	1	6.40293	4.84717e-05	0.000445009	Enriched GUL-1-GFP	Enriched GUL-1-GFP
NCU07933	V5IPV6	hypothetical protein	2.24825	0.0469255	0.279306	4.13681	0.0124666	0.0441299	0.173113	0.865317	1	8.12325	9.40593e-06	0.000116568	Enriched GUL-1-GFP	Enriched GUL-1-GFP
NCU02639	V5IP94	argininosuccite synthase, variant	2.25534	0.00188696	0.0516686	7.7345	0.000504308	0.00667915	0.526865	0.411685	1	4.39743	1.54282e-06	2.53807e-05	Enriched GUL-1-GFP	Enriched GUL-1-GFP
NCU02261	Q7S5A4	hypothetical protein	2.25641	0.0048008	0.0900085	4.91084	6.9499e-05	0.00143604	0.307421	0.666875	1	6.26354	5.23544e-09	1.52589e-07	Enriched GUL-1-GFP	Enriched GUL-1-GFP
NCU07481	Q7SG59	morphogenesis protein	2.26453	0.0130665	0.147287	5.90886	0.0084809	0.0372573	0.287802	0.68468	1	1.99118	0.0546257	0.0967713	Enriched GUL-1-GFP
NCU07182	Q1K5V9	40S ribosomal protein S24	2.27288	0.00265806	0.0624053	6.73621	0.00218094	0.0178185	0.956518	0.109191	1	3.60653	8.0713e-05	0.000667336	Enriched GUL-1-GFP	Enriched GUL-1-GFP
NCU08944	V5IM13	N-acetyltransferase complex ARD1 subunit, variant	2.28556	0.00935749	0.123003	5.47304	0.0137854	0.0460463	-0.139364	0.830143	1	0.914108	0.318967	0.404471	Enriched GUL-1-GFP
NCU16821	V5IP70	mitochondrial pyruvate dehydrogese kise	2.28588	0.0145685	0.157057	5.62975	0.0136941	0.0458908	1.05303	0.166776	1	2.12689	0.0503325	0.090706	Enriched GUL-1-GFP
NCU03466	Q1K518	hypothetical protein	2.28961	0.00199528	0.0521736	7.10609	0.000975032	0.0104062	0.642188	0.205045	1	2.39616	0.000204291	0.00133662	Enriched GUL-1-GFP	Enriched GUL-1-GFP
NCU00550	V5IR63	hypothetical protein	2.3195	0.00636927	0.106389	5.62682	0.0114152	0.0421721	0.665303	0.312316	1	5.21461	0.00117058	0.00510782	Enriched GUL-1-GFP	Enriched GUL-1-GFP
NCU05969	Q7S1V2	endo-1,4-beta-glucase	2.33925	0.00823795	0.116469	7.51467	3.79226e-09	1.62803e-07	0.0217789	0.977319	1	9.29684	1.75531e-16	1.06021e-14	Enriched GUL-1-GFP	Enriched GUL-1-GFP
NCU02942	Q7SHG2	hypothetical protein	2.33954	0.00401553	0.0808077	2.5546	0.00516388	0.0295055	0.21569	0.720381	1	3.30093	2.71374e-06	4.05506e-05	Enriched GUL-1-GFP	Enriched GUL-1-GFP
NCU01924	V5IQM8	hypothetical protein, variant	2.36613	0.00884053	0.120665	8.00193	0.000562255	0.00721392	0.324185	0.681504	1	3.01599	0.0024754	0.00909919	Enriched GUL-1-GFP	Enriched GUL-1-GFP
NCU07574	Q7S118	hypothetical protein	2.37661	0.00356347	0.0755611	5.8772	0.0083142	0.0368182	-0.0497003	0.940623	1	2.26956	0.0137566	0.0339653	Enriched GUL-1-GFP	Enriched GUL-1-GFP
NCU00831	V5IQ13	extracellular serine carboxypeptidase, variant	2.39036	0.00781766	0.114522	5.51566	0.0129927	0.0448335	0.60201	0.356571	1	5.95052	0.000201975	0.00132889	Enriched GUL-1-GFP	Enriched GUL-1-GFP
NCU16560	V5IPG1	hypothetical protein, variant 1	2.40766	0.00544492	0.0961737	5.51469	0.0127275	0.044494	0.817296	0.203256	1	6.50179	4.53173e-05	0.000423161	Enriched GUL-1-GFP	Enriched GUL-1-GFP
NCU08869	Q7S795	hypothetical protein	2.42058	0.0132226	0.148614	6.16712	0.00777901	0.0358013	2.53221	0.0044561	0.867554	6.83696	4.9078e-05	0.000448028	Enriched GUL-1-GFP	Enriched GUL-1-GFP
NCU00902	P78714	zinc finger white collar protein WC2	2.43022	0.00383079	0.0795921	5.9385	0.00796978	0.0362207	0.463867	0.491755	1	6.22289	0.000118197	0.000892391	Enriched GUL-1-GFP	Enriched GUL-1-GFP
NCU05972	Q7S033	sporulation-specific protein 6	2.43547	0.00642275	0.10686	5.37424	0.0160943	0.0496521	0.29029	0.66804	1	5.68698	0.000419737	0.00234058	Enriched GUL-1-GFP	Enriched GUL-1-GFP
NCU03737	Q1K7X3	elongation factor Tu	2.4384	0.0300036	0.22442	6.13101	0.0110648	0.0416129	4.07725	0.00322864	0.707943	6.90198	9.31065e-05	0.000742007	Enriched GUL-1-GFP	Enriched GUL-1-GFP
NCU02625	Q7SDI5	hypothetical protein	2.46032	0.0133635	0.149008	6.67129	0.00293532	0.0220087	1.97824	0.0100767	1	3.12265	0.00142154	0.00592789	Enriched GUL-1-GFP	Enriched GUL-1-GFP
NCU03199	Q7SGX0	ATP synthase subunit H	2.47149	0.00197791	0.0521736	5.71571	0.00841931	0.0370325	1.30233	0.0276654	1	5.89698	0.000152328	0.00108578	Enriched GUL-1-GFP	Enriched GUL-1-GFP
NCU06930	V5IKH1	hypothetical protein, variant 2	2.50108	0.0154505	0.162827	6.03003	0.0101172	0.040278	0.695815	0.421735	1	1.72946	0.0938623	0.149357	Enriched GUL-1-GFP
NCU15664	#N/A		2.50262	0.0201997	0.185171	7.61472	0.0020159	0.0169607	0.610049	0.537125	1	1.15081	0.303228	0.388289	Enriched GUL-1-GFP
NCU02059	Q7SDD9	endothiapepsin	2.50561	0.00573983	0.0988126	12.2263	4.80688e-08	1.72562e-06	1.54078	0.0303196	1	8.97441	8.28448e-23	7.92272e-21	Enriched GUL-1-GFP	Enriched GUL-1-GFP
NCU05200	Q7S9D2	Pro-apoptotic serine protease nma-111	2.5544	0.00530162	0.0952248	8.28121	0.000285991	0.00428866	0.0584596	0.939814	1	4.21465	4.60133e-06	6.47803e-05	Enriched GUL-1-GFP	Enriched GUL-1-GFP
NCU03552	Q7RW35	hypothetical protein	2.55525	0.0621479	0.321812	6.45839	0.00687751	0.034025	0.772121	0.413735	1	6.45155	0.00022134	0.00142863	Enriched GUL-1-GFP	Enriched GUL-1-GFP
NCU09676	Q1K6Q8	hypothetical protein	2.56852	0.00505178	0.0928209	5.96763	0.00829063	0.0368182	-0.13128	0.854227	1	6.50998	6.86693e-05	0.000588097	Enriched GUL-1-GFP	Enriched GUL-1-GFP
NCU05225	Q7RVX4	mitochondrial DH dehydrogese	2.56947	0.00302671	0.0684004	5.70012	0.0104548	0.040648	-0.0638619	0.922994	1	2.94158	0.00700906	0.0203134	Enriched GUL-1-GFP	Enriched GUL-1-GFP
NCU10282	A7UW66	hypothetical protein	2.63832	0.00885142	0.120665	6.98345	0.00331209	0.0235063	1.22292	0.172774	1	7.42771	1.8793e-05	0.00020579	Enriched GUL-1-GFP	Enriched GUL-1-GFP
NCU03297	Q7SDV9	cytochrome c peroxidase	2.66142	0.00442427	0.0853742	5.55318	0.0135078	0.0457347	0.228172	0.74537	1	6.57726	5.12435e-05	0.000463778	Enriched GUL-1-GFP	Enriched GUL-1-GFP
NCU10021	Q7S0I5	MFS monosaccharide transporter	2.73821	0.0210764	0.188213	6.5809	0.00697461	0.0340959	0.0235299	0.980243	1	4.92337	0.00602677	0.0180206	Enriched GUL-1-GFP	Enriched GUL-1-GFP
NCU05950	Q7S2C8	hypothetical protein	2.77076	0.034899	0.2402	7.11429	0.00223493	0.0180933	-0.250516	0.761277	1	7.10451	2.7116e-05	0.000277145	Enriched GUL-1-GFP	Enriched GUL-1-GFP
NCU04946	Q7S3S1	hypothetical protein	2.82292	0.00190501	0.0516686	6.70492	0.00307429	0.0225711	0.268001	0.705608	1	1.76869	0.0454499	0.084045	Enriched GUL-1-GFP
NCU09535	Q7S059	hypothetical protein	2.87452	0.00481352	0.0900085	6.24282	0.00761328	0.0353232	0.521555	0.526989	1	5.85991	0.000586194	0.00305502	Enriched GUL-1-GFP	Enriched GUL-1-GFP
NCU10762	A7UWK7	UDP-N-acetyl-glucosamine-1-P transferase Alg7	2.89454	0.059161	0.315043	6.9832	0.0069479	0.0340281	-1.02505	0.404229	1	7.81944	4.39036e-05	0.000412982	Enriched GUL-1-GFP	Enriched GUL-1-GFP
NCU01395	Q7S766	WSC domain-containing protein	2.98383	0.00990228	0.125759	6.97104	0.00121459	0.0122222	0.0471304	0.93435	1	8.16075	1.22771e-07	2.69907e-06	Enriched GUL-1-GFP	Enriched GUL-1-GFP
NCU00590	Q7SI61	hypothetical protein	2.98851	0.0048649	0.0905686	5.69584	0.0144987	0.0471008	-0.125183	0.879096	1	1.5902	0.136555	0.201843	Enriched GUL-1-GFP
NCU00329	Q7RZN5	VAD-1	2.99499	0.0200231	0.18478	6.40995	0.00534456	0.0301143	0.594267	0.530738	1	7.6887	4.13253e-06	5.88399e-05	Enriched GUL-1-GFP	Enriched GUL-1-GFP
NCU02813	Q7SEK1	eukaryotic translation initiation factor 3 subunit M	3.00333	0.00650779	0.107429	6.54081	0.00607179	0.0321818	2.27209	0.0213624	1	7.21402	3.42296e-05	0.000334599	Enriched GUL-1-GFP	Enriched GUL-1-GFP
NCU06758	Q1K8T1	hypothetical protein	3.12557	0.00753537	0.113064	6.74823	0.00187676	0.0163081	0.680204	0.298197	1	7.58389	1.10991e-06	1.91252e-05	Enriched GUL-1-GFP	Enriched GUL-1-GFP
NCU05054	Q7RXD0	hypothetical protein	3.17493	0.0290625	0.220014	6.80439	0.00641021	0.0328269	4.40095	0.00596779	1	7.96251	1.45409e-05	0.000165828	Enriched GUL-1-GFP	Enriched GUL-1-GFP
NCU08794	Q7RWX0	UPF0041 domain-containing protein	3.19099	0.0112181	0.136229	6.69096	0.00320354	0.0231351	0.787772	0.313456	1	6.98576	2.13724e-05	0.00022837	Enriched GUL-1-GFP	Enriched GUL-1-GFP
NCU00103	Q7RYM5	hypothetical protein	3.31923	0.0119381	0.14091	5.83058	0.0128143	0.0446274	0.330165	0.709737	1	2.61302	0.0193573	0.0439179	Enriched GUL-1-GFP	Enriched GUL-1-GFP
NCU03462	Q7RWJ3	leucine Rich Repeat domain-containing protein	3.3768	0.00686412	0.111141	6.61481	0.00344663	0.0236719	0.756125	0.299983	1	7.00508	1.86103e-05	0.000204179	Enriched GUL-1-GFP	Enriched GUL-1-GFP
NCU02585	Q7SHN3	aspartyl-tR synthetase	3.38023	0.0126481	0.145721	6.26489	0.00856925	0.0373683	1.33295	0.163741	1	8.05221	3.69222e-06	5.3231e-05	Enriched GUL-1-GFP	Enriched GUL-1-GFP
NCU06495	Q7RYI0	mitochondrial inner membrane organization protein mio10	3.86743	0.00189525	0.0516686	5.54412	0.014269	0.0466938	0.483345	0.502671	1	5.37523	0.00103886	0.00469367	Enriched GUL-1-GFP	Enriched GUL-1-GFP
NCU05079	Q7RWK5	MFS peptide transporter	3.99879	0.00240322	0.0580344	6.34459	0.00679667	0.0338076	0.764524	0.389749	1	3.38707	0.00364149	0.012113	Enriched GUL-1-GFP	Enriched GUL-1-GFP
NCU03559	O60044	ubiquinol-cytochrome c reductase complex core protein 2	4.41112	0.00426819	0.0838948	6.42	0.0138862	0.0461662	1.62955	0.178507	1	3.29558	0.0256279	0.0539978	Enriched GUL-1-GFP
NCU06230	Q7SBS5	serine/threonine protein kise	1.4799	0.000930288	0.0374419	2.2341	0.000144792	0.00268016	0.559716	0.160317	1	2.49469	3.5482e-08	8.92962e-07	Enriched wild-type	Enriched GUL-1-GFP
NCU02265	P19970	period clock protein FRQ	1.56309	0.00132184	0.0444987	0.560027	0.357085	0.492656	0.488531	0.226135	1	1.36261	0.00534159	0.0163992	Enriched wild-type	Enriched GUL-1-GFP
NCU07117	V5IKK3	ornithine-N5-oxygese, variant	1.60529	0.00117703	0.0414511	1.3765	0.036082	0.0791088	0.429646	0.343148	1	1.98365	0.000152812	0.00108762	Enriched wild-type	Enriched GUL-1-GFP
NCU02806	Q7RVK6	14-3-3 family protein 7	1.6317	0.000761327	0.0342451	3.94797	2.0065e-05	0.000466086	0.47159	0.259466	1	5.15756	7.64977e-11	2.76065e-09	Enriched wild-type	Enriched GUL-1-GFP
NCU03523	Q1K5E5	serine/threonine protein kise	1.7803	0.000761722	0.0342451	2.23175	0.00140733	0.0134093	0.75168	0.0912575	1	3.45968	3.78681e-09	1.12004e-07	Enriched wild-type	Enriched GUL-1-GFP
NCU04304	P07144	outer mitochondrial membrane protein porin	1.78998	0.000138962	0.0150578	7.28722	0.000501245	0.00667201	0.936368	0.0183094	1	7.52388	4.45622e-07	8.52326e-06	Enriched wild-type	Enriched GUL-1-GFP
NCU08681	Q7S8V4	hypothetical protein	1.80431	0.00091697	0.0374419	1.57616	0.042803	0.0893252	0.632494	0.146983	1	1.51119	0.00603457	0.0180346	Enriched wild-type	Enriched GUL-1-GFP
NCU00064	Q7RX86	hypothetical protein	1.8178	0.000957259	0.0381639	2.65313	0.000258477	0.00399403	0.805769	0.0905607	1	3.34251	1.44352e-09	4.53921e-08	Enriched wild-type	Enriched GUL-1-GFP
NCU07123	Q7S6C9	hypothetical protein	1.82858	1.53176e-05	0.0051811	1.01355	0.0823493	0.150318	0.382917	0.253894	1	1.01119	0.018641	0.0427335	Enriched wild-type	Enriched GUL-1-GFP
NCU01871	V5IP08	hypothetical protein, variant	1.83744	0.000260733	0.0189975	1.7117	0.0102935	0.0403786	0.297652	0.511952	1	2.38835	7.55244e-06	9.71658e-05	Enriched wild-type	Enriched GUL-1-GFP
NCU03703	Q9HE25	60S ribosomal protein L17	1.84196	0.00126213	0.0433639	6.86781	0.00132172	0.0128696	0.629768	0.180737	1	2.87086	4.09889e-05	0.00039004	Enriched wild-type	Enriched GUL-1-GFP
NCU05800	V5ILT0	zinc knuckle domain-containing protein, variant	1.85495	0.00157617	0.0479202	7.7087	0.000314911	0.00466331	0.869869	0.080457	1	8.04689	1.45227e-07	3.09782e-06	Enriched wild-type	Enriched GUL-1-GFP
NCU09468	P38669	alpha-tubulin	1.8809	0.00126035	0.0433639	2.52924	0.00203482	0.0169657	0.352826	0.48331	1	3.29148	8.10442e-08	1.83083e-06	Enriched wild-type	Enriched GUL-1-GFP
NCU08563	Q01277	sulfur controller-2 protein	1.90571	0.00138273	0.0449493	2.22068	0.0085302	0.0373683	0.316213	0.50273	1	4.64564	1.40773e-07	3.03019e-06	Enriched wild-type	Enriched GUL-1-GFP
NCU05266	Q7S859	KH domain-containing protein	1.93629	0.000879703	0.0374419	8.46177	8.38685e-05	0.00169357	0.596634	0.228386	1	3.90981	2.49259e-09	7.52761e-08	Enriched wild-type	Enriched GUL-1-GFP
NCU09152	Q7S0Z2	hypothetical protein	1.99234	0.000102654	0.0127593	1.41266	0.038577	0.0830423	0.865416	0.0706041	1	2.1011	9.63126e-05	0.000761215	Enriched wild-type	Enriched GUL-1-GFP
NCU08766	Q872W1	hypothetical protein	2.00464	0.00150131	0.046651	3.02987	0.000264995	0.00407034	-0.303497	0.565001	1	4.1684	2.14397e-10	7.41091e-09	Enriched wild-type	Enriched GUL-1-GFP
NCU01477	Q7RXV4	hypothetical protein	2.01835	0.00121743	0.0425194	7.80163	3.11204e-18	1.00547e-15	0.596108	0.260049	1	7.41723	1.07669e-33	1.76516e-31	Enriched wild-type	Enriched GUL-1-GFP
NCU06843	P59671	60S ribosomal protein L3	2.02158	0.0011007	0.0411643	3.7263	0.000338212	0.0048468	0.905232	0.0926056	1	3.33674	1.0213e-06	1.77582e-05	Enriched wild-type	Enriched GUL-1-GFP
NCU02810	Q7SEK4	eukaryotic translation initiation factor 2 gamma subunit	2.02579	0.000609219	0.0304385	6.58024	0.00193664	0.0166251	0.0911691	0.8425	1	7.23885	1.78127e-06	2.87381e-05	Enriched wild-type	Enriched GUL-1-GFP
NCU09869	V5ILH3	exocyst complex component Sec3	2.03339	0.00105227	0.0401838	6.77382	0.00158668	0.0145712	0.265439	0.595735	1	3.94189	9.89201e-06	0.000121658	Enriched wild-type	Enriched GUL-1-GFP
NCU01528	P54118	glyceraldehyde 3-phosphate-dehydrogese	2.03607	0.00141396	0.0452776	1.31931	0.129229	0.21954	0.644029	0.293883	1	1.3314	0.0521883	0.0930856	Enriched wild-type
NCU01977	V5IQ43	urea transporter, variant	2.0505	6.35963e-05	0.00947354	1.42871	0.0341612	0.0758805	0.03816	0.930872	1	2.00989	0.000107311	0.000826619	Enriched wild-type	Enriched GUL-1-GFP
NCU04770	Q7RVB4	TATA-binding protein	2.06068	0.000612228	0.0304385	3.83689	6.58543e-07	1.98344e-05	0.179489	0.734012	1	5.26934	4.5838e-18	3.20754e-16	Enriched wild-type	Enriched GUL-1-GFP
NCU08779	U9W3Q8	hypothetical protein, variant	2.07151	0.000189474	0.0184653	2.39513	0.00109818	0.0112154	0.775807	0.122612	1	3.19992	2.99131e-08	7.71852e-07	Enriched wild-type	Enriched GUL-1-GFP
NCU10346	V5IN25	hypothetical protein, variant	2.08877	0.000351899	0.0225322	1.51948	0.046743	0.0953447	0.789229	0.112094	1	2.55494	1.71519e-05	0.00018963	Enriched wild-type	Enriched GUL-1-GFP
NCU00242	Q7RZW9	V-SRE	2.13113	0.000223242	0.0185156	1.7807	0.0124156	0.0440512	0.395189	0.407029	1	2.69654	1.27295e-06	2.1483e-05	Enriched wild-type	Enriched GUL-1-GFP
NCU00596	Q7SI55	lipoyltransferase	2.14163	0.000911661	0.0374419	7.40918	0.000584675	0.00734253	0.331075	0.516105	1	2.81382	1.26201e-05	0.000146884	Enriched wild-type	Enriched GUL-1-GFP
NCU08449	Q7SC61	hypothetical protein	2.16932	0.000323444	0.0213574	7.40166	0.000551501	0.00715342	0.7476	0.119805	1	2.71794	1.64857e-05	0.000184037	Enriched wild-type	Enriched GUL-1-GFP
NCU01543	Q7RWZ1	PTAB	2.1706	1.31484e-05	0.0051811	2.35217	0.000202616	0.00341279	0.495014	0.204529	1	3.76008	4.12422e-13	1.87816e-11	Enriched wild-type	Enriched GUL-1-GFP
NCU00121	Q7RYK8	CLC channel protein	2.1857	0.00025949	0.0189975	8.18965	0.000138498	0.00259064	0.564131	0.247801	1	2.8523	1.92868e-06	3.0487e-05	Enriched wild-type	Enriched GUL-1-GFP
NCU06185	Q7SBI6	ACW-9	2.2007	0.000815267	0.0362075	4.88938	8.98901e-09	3.54966e-07	0.593012	0.308453	1	6.89509	3.02642e-23	2.99407e-21	Enriched wild-type	Enriched GUL-1-GFP
NCU06429	Q7RYY6	alpha-actinin	2.2281	0.00106497	0.0401838	0.436249	0.606235	0.719866	0.130527	0.798023	1	6.07081	8.01936e-05	0.000663999	Enriched wild-type	Enriched GUL-1-GFP
NCU04442	Q7RZ32	GAL10	2.24549	0.000143882	0.0152011	5.50334	2.41666e-08	8.85443e-07	0.912799	0.0655145	1	4.9433	4.38309e-16	2.56635e-14	Enriched wild-type	Enriched GUL-1-GFP
NCU05970	Q7RU12	hypothetical protein	2.25125	0.00132675	0.0444987	1.80833	0.0486063	0.0981515	0.426001	0.468355	1	1.75356	0.0139935	0.0343875	Enriched wild-type	Enriched GUL-1-GFP
NCU02003	Q01372	elongation factor 1 alpha	2.25438	0.000384201	0.0228681	1.97123	0.0208371	0.05623	1.0442	0.0812093	1	2.70588	5.73613e-05	0.000508715	Enriched wild-type	Enriched GUL-1-GFP
NCU14176	#N/A		2.29668	0.000297857	0.0203023	2.42388	0.00564384	0.0310499	0.651585	0.291411	1	2.98749	1.60386e-05	0.000180592	Enriched wild-type	Enriched GUL-1-GFP
NCU09602	Q01233	heat shock protein 70	2.30422	0.000569078	0.0300616	0.690522	0.424698	0.557378	0.403161	0.508962	1	2.08043	0.0025067	0.00919657	Enriched wild-type	Enriched GUL-1-GFP
NCU03471	V5IPQ1	DUF6 domain-containing protein	2.37665	0.000643822	0.0312735	3.1901	0.00459555	0.0276182	0.143575	0.796324	1	2.36621	0.00140737	0.00588485	Enriched wild-type	Enriched GUL-1-GFP
NCU02193	P33287	pyruvate decarboxylase	2.38212	1.58038e-06	0.00271172	1.01296	0.125318	0.214268	0.478392	0.304027	1	1.21089	0.0200913	0.0451738	Enriched wild-type	Enriched GUL-1-GFP
NCU08502	V5INQ2	40S ribosomal protein S6, variant 1	2.38975	0.00015353	0.0154481	1.93987	0.0256073	0.0626991	0.365452	0.468618	1	8.11848	1.5174e-07	3.22476e-06	Enriched wild-type	Enriched GUL-1-GFP
NCU04088	Q7RWM1	hypothetical protein	2.40781	0.000330099	0.0214615	7.05042	0.000945238	0.010242	0.406192	0.371185	1	2.5694	4.91128e-05	0.000448028	Enriched wild-type	Enriched GUL-1-GFP
NCU06196	Q7SBH7	hypothetical protein	2.4093	0.000609911	0.0304385	11.179	2.8917e-07	9.34282e-06	0.841319	0.140041	1	7.19755	4.20306e-22	3.71033e-20	Enriched wild-type	Enriched GUL-1-GFP
NCU14131	#N/A		2.41113	0.00155838	0.0479202	6.53903	0.00324458	0.0232954	-0.403687	0.518042	1	6.95272	1.41751e-05	0.000162025	Enriched wild-type	Enriched GUL-1-GFP
NCU08468	Q7RVZ1	actin-interacting protein	2.4218	0.000117305	0.0133887	0.752768	0.345974	0.48188	0.632216	0.215077	1	1.02923	0.091326	0.14603	Enriched wild-type
NCU07997	Q7SAP3	hypothetical protein	2.42716	0.00162262	0.0489798	3.23797	0.00320923	0.0231351	0.142721	0.792618	1	7.50708	1.28236e-06	2.15782e-05	Enriched wild-type	Enriched GUL-1-GFP
NCU05404	Q1K8R8	endoglucase	2.45648	0.000206004	0.0185156	7.56436	1.89089e-18	7.46691e-16	0.762326	0.206909	1	8.99696	7.66803e-40	1.91301e-37	Enriched wild-type	Enriched GUL-1-GFP
NCU06815	V5IN48	hypothetical protein, variant	2.46612	0.000111195	0.0133887	1.92096	0.0169269	0.0508497	0.871393	0.11035	1	2.75013	2.00544e-05	0.000216708	Enriched wild-type	Enriched GUL-1-GFP
NCU02086	Q7SCR0	hypothetical protein	2.50443	0.000697621	0.0325438	1.7359	0.0571293	0.111822	0.396212	0.487997	1	1.44148	0.041873	0.0787338	Enriched wild-type
NCU07735	Q7S8Q6	Grp1p	2.52878	0.00113188	0.0414511	7.35902	0.00092596	0.010157	1.03928	0.112609	1	8.22382	2.82272e-07	5.56589e-06	Enriched wild-type	Enriched GUL-1-GFP
NCU07568	Q7S1Y5	hypothetical protein	2.53803	0.00134885	0.0445631	6.43583	0.00273443	0.0208544	0.765376	0.158762	1	2.77272	0.000166678	0.00114672	Enriched wild-type	Enriched GUL-1-GFP
NCU02896	Q7SHK8	ADA-3	2.55574	0.00141426	0.0452776	6.15492	0.00456643	0.0275069	0.511107	0.359663	1	1.40244	0.0482156	0.0876064	Enriched wild-type
NCU08961	V5IMV5	hypothetical protein, variant	2.56221	1.66137e-05	0.0051811	1.88883	0.0129685	0.0448335	0.284384	0.556624	1	3.40618	6.04645e-08	1.41035e-06	Enriched wild-type	Enriched GUL-1-GFP
NCU08729	Q7SCG2	transcription initiation factor TFIID 23-30kDa subunit	2.60197	0.000901353	0.0374419	0.395042	0.669468	0.770545	0.17643	0.766244	1	2.54487	0.00649156	0.0190962	Enriched wild-type	Enriched GUL-1-GFP
NCU01255	F5HC00	mitochondrial dymin GTPase	2.60616	0.000482599	0.0264238	1.01745	0.26546	0.396073	0.450431	0.451632	1	2.00258	0.00563532	0.0170641	Enriched wild-type	Enriched GUL-1-GFP
NCU10028	Q7S0F0	bax Inhibitor family protein	2.62425	0.00164205	0.0491866	1.42512	0.191139	0.302318	0.546127	0.402034	1	6.51423	4.76673e-05	0.000441866	Enriched wild-type	Enriched GUL-1-GFP
NCU04164	V5IMR2	hypothetical protein, variant	2.62651	0.000624596	0.0306923	6.24357	0.00431129	0.0265552	0.724809	0.215765	1	6.62296	2.5214e-05	0.000262574	Enriched wild-type	Enriched GUL-1-GFP
NCU09469	Q7SC12	EF hand domain-containing protein	2.66659	2.39715e-05	0.00595903	2.63939	0.00665751	0.0333721	0.658512	0.176772	1	3.0856	4.8038e-06	6.70661e-05	Enriched wild-type	Enriched GUL-1-GFP
NCU02318	Q7S417	hypothetical protein	2.69197	0.00143776	0.0454174	5.71852	0.00883295	0.0378677	1.40817	0.0232375	1	6.55211	2.9539e-05	0.000295479	Enriched wild-type	Enriched GUL-1-GFP
NCU04779	Q7S630	60S ribosomal protein L8	2.69455	0.000148394	0.0152954	2.47224	0.0122755	0.0438904	0.407947	0.499258	1	4.09289	1.1597e-06	1.97459e-05	Enriched wild-type	Enriched GUL-1-GFP
NCU05686	Q7SBQ2	cell wall glucase	2.69483	4.35063e-05	0.00832992	1.63354	0.0428278	0.0893252	0.176957	0.742285	1	2.44607	9.28686e-05	0.00074114	Enriched wild-type	Enriched GUL-1-GFP
NCU11181	P0C583	Ras superfamily GTPase	2.74853	0.000691652	0.0325438	5.82489	0.00780473	0.0358013	0.937512	0.111958	1	2.20947	0.0142271	0.0348868	Enriched wild-type	Enriched GUL-1-GFP
NCU07014	P27770	40S ribosomal protein S17	2.7574	0.00020522	0.0185156	6.34716	0.00338721	0.0235063	0.447021	0.397306	1	6.71048	1.56505e-05	0.000176777	Enriched wild-type	Enriched GUL-1-GFP
NCU00567	P54898	Arg-6 protein	2.79408	0.00105619	0.0401838	3.21382	0.00804034	0.0364018	1.0432	0.164362	1	3.18135	0.000183097	0.00122592	Enriched wild-type	Enriched GUL-1-GFP
NCU08417	V5INS1	hypothetical protein	2.79526	0.000249399	0.0188557	6.95207	0.00153824	0.0141998	0.636578	0.289791	1	1.88613	0.00738792	0.0211357	Enriched wild-type	Enriched GUL-1-GFP
NCU01221	Q9P720	60S ribosomal protein L16, variant	2.79537	0.00027755	0.0195488	7.61661	0.000639981	0.00776278	0.391849	0.543094	1	3.52102	4.20722e-05	0.000397711	Enriched wild-type	Enriched GUL-1-GFP
NCU08360	Q7SGQ5	hypothetical protein	2.80452	0.000892668	0.0374419	6.67984	0.00272057	0.0207933	0.948529	0.151724	1	3.86925	0.000132319	0.000977154	Enriched wild-type	Enriched GUL-1-GFP
NCU08137	Q7S3Z3	hypothetical protein	2.80576	0.000228633	0.0185156	8.58466	0.000117947	0.0023288	0.963255	0.138786	1	4.50381	9.03321e-06	0.000112435	Enriched wild-type	Enriched GUL-1-GFP
NCU09559	Q7RVS4	clock-controlled protein 9	2.82923	0.000910971	0.0374419	1.74033	0.107274	0.187248	0.861348	0.217906	1	1.75672	0.0291293	0.0593133	Enriched wild-type
NCU02466	Q7SG97	SVP1-like protein 2	2.87954	0.000428697	0.0244821	5.71751	0.00832027	0.0368182	0.183696	0.739514	1	5.25475	0.000735764	0.00363011	Enriched wild-type	Enriched GUL-1-GFP
NCU03565	Q1K4V7	ribosomal protein L26	3.02252	0.000244326	0.0188557	2.99075	0.00956954	0.039433	0.411307	0.560599	1	2.23914	0.00610783	0.0182155	Enriched wild-type	Enriched GUL-1-GFP
NCU00951	Q6MVH7	inorganic pyrophosphatase	3.02685	0.000413771	0.0239534	6.83098	0.00236574	0.0188085	2.2775	0.00485611	0.924877	3.03393	0.00138596	0.0058176	Enriched wild-type	Enriched GUL-1-GFP
NCU04010	Q1K616	malonyl CoA-acyl carrier protein transacylase	3.02721	6.20366e-05	0.00947354	2.67229	0.013881	0.0461662	0.0761082	0.882476	1	1.11589	0.0775496	0.128249	Enriched wild-type
NCU00164	Q7RXP4	DDT domain-containing protein	3.03816	0.00168706	0.0491866	5.83527	0.00961569	0.0394621	0.260689	0.717612	1	6.50397	6.54934e-05	0.000564266	Enriched wild-type	Enriched GUL-1-GFP
NCU00493	Q7RWT5	coatomer subunit delta	3.09056	4.97284e-05	0.00875634	5.76916	0.00724644	0.0347224	0.944704	0.0659174	1	3.73539	0.000158481	0.00111169	Enriched wild-type	Enriched GUL-1-GFP
NCU00541	V5IQ86	hypothetical protein, variant	3.22858	1.92502e-06	0.00271172	8.28334	0.000131045	0.00253117	0.434867	0.405982	1	8.56668	3.46817e-08	8.80546e-07	Enriched wild-type	Enriched GUL-1-GFP
NCU05810	Q01369	guanine nucleotide-binding protein subunit beta-like protein	3.40078	2.02631e-05	0.00535199	3.74728	0.00072861	0.0086316	0.449513	0.50662	1	4.64096	5.21872e-08	1.2374e-06	Enriched wild-type	Enriched GUL-1-GFP
NCU01499	Q1K5L1	hypothetical protein	3.42127	9.93036e-05	0.0127169	6.18823	0.00468641	0.027852	0.0912389	0.875023	1	1.49635	0.033393	0.0660721	Enriched wild-type
NCU11173	A7UVT5	thiamine-phosphate pyrophosphorylase	3.42927	0.000321105	0.0213574	1.41715	0.203926	0.317874	0.338951	0.562324	1	5.6166	0.000314301	0.00185923	Enriched wild-type	Enriched GUL-1-GFP
NCU06781	Q1K8Y9	1,3-beta-glucanosyltransferase Gel2	3.44965	1.75265e-05	0.0051811	11.1912	5.41545e-07	1.65918e-05	1.21865	0.0647221	1	7.29297	1.59607e-18	1.17414e-16	Enriched wild-type	Enriched GUL-1-GFP
NCU09315	P20824	phosphorus acquisition-controlling protein	3.48042	7.31549e-05	0.00966102	6.34847	0.00370342	0.0245102	0.541571	0.360157	1	3.32095	0.000492752	0.0026534	Enriched wild-type	Enriched GUL-1-GFP
NCU01882	V5IP64	purine transporter	3.51349	0.00168594	0.0491866	6.08794	0.00973621	0.0395006	0.569626	0.503124	1	6.42982	0.000180459	0.00121108	Enriched wild-type	Enriched GUL-1-GFP
NCU09119	Q7S2M9	ATP synthase subunit gamma	3.66359	1.83901e-05	0.0051811	1.51269	0.128929	0.219241	0.595623	0.326977	1	7.1615	5.5557e-06	7.57211e-05	Enriched wild-type	Enriched GUL-1-GFP
NCU08367	Q7SGP8	hypothetical protein	3.68588	0.00173422	0.0491866	6.76977	0.00193515	0.0166251	0.994543	0.110091	1	3.4468	1.64191e-05	0.00018401	Enriched wild-type	Enriched GUL-1-GFP
NCU00324	Q7RZP0	hypothetical protein	3.81577	0.00111452	0.0413154	5.20773	0.016908		0.696533	0.251078	1	5.3865	0.000587086	0.00305639	Enriched wild-type	Enriched GUL-1-GFP
NCU09085	Q7SFR5	cyclin	3.85008	5.62342e-06	0.00487668	4.71114	2.99437e-05	0.000682179	0.763761	0.270959	1	5.8145	2.02762e-12	8.61815e-11	Enriched wild-type	Enriched GUL-1-GFP
NCU09874	Q7S240	hypothetical protein	3.86334	6.32087e-05	0.00947354	7.97253	0.000451014	0.0060716	0.891985	0.223866	1	9.01626	4.25466e-08	1.03446e-06	Enriched wild-type	Enriched GUL-1-GFP
NCU08952	Q1K6L3	translation regulator GCD7	3.88208	0.00115812	0.0414511	5.36634	0.0150404	0.0481509	0.541962	0.400114	1	6.15952	0.000105846	0.000820736	Enriched wild-type	Enriched GUL-1-GFP
NCU09098	Q7SFQ2	tetracycline transporter	3.93646	0.00134976	0.0445631	5.53181	0.0137001	0.0458908	0.30824	0.655714	1	6.39682	7.92139e-05	0.000659612	Enriched wild-type	Enriched GUL-1-GFP
NCU04044	P24917	DH2 dehydrogese flavoprotein 1	3.95454	0.00103964	0.0401838	-0.091421	0.926955	0.953516	1.32081	0.0542369	1	6.28933	8.42627e-05	0.000690323	Enriched wild-type	Enriched GUL-1-GFP
NCU02629	Q7SDI1	bifunctiol purine biosynthesis protein	3.97932	1.72966e-05	0.0051811	8.06947	0.000444279	0.00602659	0.681416	0.373012	1	2.73114	0.00173371	0.00687493	Enriched wild-type	Enriched GUL-1-GFP
NCU16329	V5IQH8	hypothetical protein	4.03234	0.00172448	0.0491866	-1.55027	0.183883		0.00611777	0.993939	1	4.44173	0.00834643	0.0230804	Enriched wild-type	Enriched GUL-1-GFP
NCU02028	Q1K921	aromatic ring-opening dioxygese LigB subunit	4.04345	0.0015754	0.0479202	5.58986	0.01518		1.76119	0.0402696	1	5.10829	0.00227657	0.00852673	Enriched wild-type	Enriched GUL-1-GFP
NCU06462	Q7RYV7	hypothetical protein	4.09074	0.000988037	0.0390228	5.00223	0.0269781		0.0281782	0.969566	1	0.725	0.444817	0.531299	Enriched wild-type
NCU02412	V5IL02	hypothetical protein, variant	4.12451	0.00070005	0.0325438	5.9892	0.00728997	0.0347766	0.52094	0.440444	1	6.88476	1.90744e-05	0.000208267	Enriched wild-type	Enriched GUL-1-GFP
NCU04292	Q1K779	branched-chain-amino-acid aminotransferase	4.13433	0.000732359	0.0336407	0.560456	0.653982	0.759063	0.266378	0.695645	1	5.27648	0.00113031	0.0049967	Enriched wild-type	Enriched GUL-1-GFP
NCU02358	Q7S4W8	SDS23	4.14023	0.00145505	0.0455485	5.52262	0.0176203	0.0517543	1.2504	0.130448	1	1.36118	0.216028	0.294085	Enriched wild-type
NCU07608	V5ILU5	ribose 5-phosphate isomerase A	4.16219	0.00169653	0.0491866	5.13679	0.0292819		0.770982	0.398226	1	1.3711	0.215122	0.29327	Enriched wild-type
NCU17074	V5ILB9	hypothetical protein	4.16523	0.000461463	0.0260019	5.84858	0.00790779	0.0360774	-0.392562	0.507286	1	1.63545	0.0404154	0.076637	Enriched wild-type
NCU03757	Q1K7B7	60S ribosomal protein L4-A	4.1675	6.18346e-07	0.00261313	7.99183	0.000311469	0.00463163	0.592228	0.349238	1	8.88932	2.59888e-08	6.74769e-07	Enriched wild-type	Enriched GUL-1-GFP
NCU14146	#N/A		4.18786	0.00130977	0.0444987	0.0813434	0.94654	0.96617	0.306323	0.705537	1	3.78727	0.00184753	0.00723626	Enriched wild-type	Enriched GUL-1-GFP
NCU06223	Q7SBT2	hypothetical protein	4.21107	0.000487708	0.0264238	5.74745	0.00971017	0.0394761	1.29467	0.0626703	1	6.71421	2.77476e-05	0.000281798	Enriched wild-type	Enriched GUL-1-GFP
NCU06586	Q7S8M8	AN1 zinc finger protein	4.21903	0.000822509	0.0362075	0.247714	0.838116		0.316846	0.696683	1	2.81416	0.0156387	0.0375145	Enriched wild-type	Enriched GUL-1-GFP
NCU10080	Q7RZZ6	hypothetical protein	4.23358	0.000486282	0.0264238	5.7321	0.0101413	0.040278	0.878851	0.206301	1	6.34052	8.08755e-05	0.000667717	Enriched wild-type	Enriched GUL-1-GFP
NCU00258	O43105	40s ribosomal protein s7	4.24388	2.94201e-05	0.00654366	1.68778	0.113073	0.195743	1.43604	0.0292292	1	7.35436	4.56281e-06	6.44862e-05	Enriched wild-type	Enriched GUL-1-GFP
NCU03910	Q9P5L0	microsomal cytochrome b5	4.249	0.000271754	0.019465	7.66082	0.000432003	0.00591459	0.660987	0.250392	1	7.85009	5.05824e-07	9.54743e-06	Enriched wild-type	Enriched GUL-1-GFP
NCU02772	Q7SE22	hypothetical protein	4.25036	0.00144011	0.0454174	0.189267	0.884292	0.922987	-0.147579	0.867918	1	1.52556	0.137315	0.2026	Enriched wild-type
NCU07587	Q7SBG9	Swi6	4.26614	0.00117609	0.0414511	5.93392	0.0113248	0.0420566	0.0768078	0.930292	1	6.08971	0.000360597	0.0020691	Enriched wild-type	Enriched GUL-1-GFP
NCU05116	Q1K5M3	phosphoglycerate mutase	4.30928	0.000364063	0.0226587	0.406372	0.723021		0.110576	0.87082	1	5.42941	0.000724201	0.00358848	Enriched wild-type	Enriched GUL-1-GFP
NCU08046	Q6MFP4	eukaryotic translation initiation factor 3	4.30941	0.00172607	0.0491866	5.732	0.017511	0.0516784	1.37863	0.151459	1	5.6802	0.00130756	0.00555761	Enriched wild-type	Enriched GUL-1-GFP
NCU07576	Q7S116	hypothetical protein	4.31589	0.000602816	0.0304385	5.75644	0.0115619	0.0426256	0.00159999	0.998308	1	-0.447356	0.592254	0.670023	Enriched wild-type
NCU10063	Q7S049	sugar isomerase	4.31799	5.94845e-06	0.00487668	8.27884	0.000137909	0.00259064	2.08326	0.000154893	0.402635	7.87111	4.41372e-07	8.4702e-06	Enriched wild-type	Enriched GUL-1-GFP
NCU07505	Q7SG37	mito ribosomal protein L18	4.33002	0.000585604	0.0304385	-0.135748	0.905378	0.940028	-0.178907	0.81378	1	4.61561	0.00537443	0.0164735	Enriched wild-type	Enriched GUL-1-GFP
NCU05457	P06810	cytochrome c oxidase subunit IV	4.35266	0.000544304	0.0291168	6.03003	0.00817616	0.0367359	1.02565	0.178987	1	1.79464	0.0527308	0.0938491	Enriched wild-type
NCU06137	Q7S5F1	cytochrome P450 55A2	4.36384	0.000216585	0.0185156	5.34626	0.0147974	0.0477224	-0.0854889	0.885155	1	6.36356	5.43448e-05	0.000485485	Enriched wild-type	Enriched GUL-1-GFP
NCU06268	Q7SB72	vacuolar protein sorting-associated protein	4.39257	0.000193503	0.0184653	-0.2527	0.784003	0.860515	0.396765	0.516618	1	5.90911	0.000177856	0.00119922	Enriched wild-type	Enriched GUL-1-GFP
NCU05420	Q12640	chorismate synthase	4.4434	0.0016565	0.0491866	-0.383677	0.78933	0.863662	1.48886	0.160458	1	1.25488	0.279404	0.363131	Enriched wild-type
NCU00170	Q7RXN8	DJ domain-containing protein	4.44996	0.000296938	0.0203023	0.493524	0.678958		0.614837	0.430512	1	2.17685	0.0368378	0.0710983	Enriched wild-type
NCU08767	F5HB11	serine/threonine-protein kise RIO1	4.4582	0.00171928	0.0491866	-0.943218	0.533527		-1.18217	0.243375	1	1.16839	0.360107	0.447831	Enriched wild-type
NCU11138	A7UWD4	hypothetical protein	4.48986	0.00136173	0.0446097	6.09439	0.0126413	0.0443943	2.50263	0.0184004	1	6.48108	0.000300303	0.00179494	Enriched wild-type	Enriched GUL-1-GFP
NCU01021	Q9P748	eukaryotic translation initiation factor 3 subunit EifCf	4.49295	0.0011487	0.0414511	5.27259	0.0294839	0.0688022	1.06915	0.279341	1	1.38838	0.218723	0.29726	Enriched wild-type
NCU04312	Q7S7L4	nuclear migration protein NudF-1	4.49995	0.000232212	0.0185156	6.09625	0.00650122	0.0330036	0.30165	0.666253	1	2.90241	0.00296356	0.0104069	Enriched wild-type	Enriched GUL-1-GFP
NCU10273	A7UWE4	Hsc70 cochaperone	4.53367	7.12352e-05	0.00966102	5.09418	0.0179767		1.04442	0.104542	1	0.580309	0.406077	0.493555	Enriched wild-type
NCU09176	Q7S339	hypothetical protein	4.54384	0.00022085	0.0185156	5.19363	0.0210035	0.0565932	-0.763981	0.30003	1	0.36061	0.67537	0.743804	Enriched wild-type
NCU00768	Q7SFW1	mR binding post-transcriptiol regulator	4.54699	0.00038092	0.0228681	5.86345	0.0109596	0.0414011	0.235479	0.767771	1	6.37811	0.000138454	0.00100691	Enriched wild-type	Enriched GUL-1-GFP
NCU00923	Q7SFC4	topogenesis of outer membrane beta barrel protein 37	4.57578	0.000120391	0.0133887	5.5174	0.0123583	0.0440512	0.233322	0.707916	1	1.84099	0.0383023	0.0732596	Enriched wild-type
NCU05989	V5IM94	hypothetical protein	4.65681	4.17418e-05	0.00832992	5.23297	0.0148388	0.0477258	-0.114108	0.821776	1	5.6796	0.000222073	0.00143175	Enriched wild-type	Enriched GUL-1-GFP
NCU02179	Q7SE05	D-lactate dehydrogese	4.65844	0.000700777	0.0325438	5.56752	0.0210694	0.0566099	-0.0234416	0.979703	1	5.65881	0.00136912	0.00576374	Enriched wild-type	Enriched GUL-1-GFP
NCU09700	Q7S2S6	T-complex protein 1 subunit beta	4.69261	0.000381791	0.0228681	5.81982	0.0133515	0.0454963	0.936063	0.317402	1	2.64	0.0159686	0.0380357	Enriched wild-type	Enriched GUL-1-GFP
NCU00692	Q7SHW2	chaperone dK	4.72557	0.00105359	0.0401838	0.203822	0.894209	0.93087	0.850356	0.415848	1	5.79809	0.00157763	0.00639748	Enriched wild-type	Enriched GUL-1-GFP
NCU06437	Q7RYY0	hypothetical protein	4.73566	3.69556e-05	0.00780871	5.49383	0.0109798	0.0414247	1.16105	0.0324999	1	6.21036	6.02814e-05	0.000525909	Enriched wild-type	Enriched GUL-1-GFP
NCU02269	Q7S597	mitochondrial carnitine/acylcarnitine carrier protein	4.76193	0.000226472	0.0185156	0.11796	0.921204	0.950627	-0.862579	0.302826	1	6.38694	0.000151232	0.00108066	Enriched wild-type	Enriched GUL-1-GFP
NCU08399	V5IKV1	polyketide synthase 4, variant	4.78035	6.71633e-05	0.00947354	6.76852	0.0022451	0.0181343	1.20118	0.0751977	1	7.49741	2.62079e-06	3.93667e-05	Enriched wild-type	Enriched GUL-1-GFP
NCU04020	Q1K609	lysyl-tR synthetase	4.80978	0.000364598	0.0226587	5.93428	0.0128332	0.0446274	1.78168	0.0723374	1	1.05209	0.304956	0.389913	Enriched wild-type
NCU08633	Q7SFI8	cactin	4.84715	2.69914e-05	0.00633698	0.641646	0.494833	0.625627	0.293176	0.611132	1	6.23784	6.03323e-05	0.000525909	Enriched wild-type	Enriched GUL-1-GFP
NCU09657	Q7S266	hypothetical protein	4.85608	0.000249863	0.0188557	6.44606	0.00625526	0.0325017	1.77786	0.0701881	1	7.14192	3.24791e-05	0.000319666	Enriched wild-type	Enriched GUL-1-GFP
NCU00675	Q7SHX8	efr-3	4.89698	1.49023e-05	0.0051811	5.96374	0.00535857	0.0301143	1.43454	0.00642274	1	7.19103	2.65461e-06	3.97707e-05	Enriched wild-type	Enriched GUL-1-GFP
NCU11030	A7UVU5	hypothetical protein	4.90875	6.72519e-05	0.00947354	5.19356	0.0211825	0.0566579	0.125943	0.85752	1	5.25964	0.00125922	0.00541163	Enriched wild-type	Enriched GUL-1-GFP
NCU07982	V5INN6	acetolactate synthase	4.93285	0.000196625	0.0184653	-0.422856	0.735731	0.822778	0.0808481	0.928716	1	1.98464	0.0521169	0.093001	Enriched wild-type
NCU00713	Q7SET3	isochorismatase family hydrolase	5.00642	0.000401844	0.023586	0.989385	0.508451	0.637627	-0.565505	0.586325	1	1.83256	0.138626	0.204114	Enriched wild-type
NCU00636	Q7SI16	ATP synthase subunit D	5.04609	6.37071e-05	0.00947354	6.13752	0.00726483	0.0347224	0.162201	0.827098	1	0.539412	0.544674	0.626698	Enriched wild-type
NCU06506	Q7RYG9	hypothetical protein	5.11639	0.000898836	0.0374419	5.40212	0.0384558	0.0829613	0.550269	0.640463	1	5.08855	0.00855803	0.0235746	Enriched wild-type	Enriched GUL-1-GFP
NCU05689	P06809	cytochrome c oxidase polypeptide IV	5.20487	9.37321e-06	0.0049514	6.09199	0.00540854	0.0302708	0.493589	0.403475	1	1.31118	0.079524	0.130898	Enriched wild-type
NCU10468	A7UWD5	arginine biosynthesis argJ	5.31169	7.16352e-06	0.00487668	6.95622	0.00156069	0.0143697	0.729177	0.251807	1	7.74361	9.81925e-07	1.71863e-05	Enriched wild-type	Enriched GUL-1-GFP
NCU06821	F5HH14	CRO1 protein	5.41908	8.0778e-06	0.00487668	1.28393	0.218042	0.336337	1.82761	0.0118291	1	1.92235	0.0168212	0.0395411	Enriched wild-type	Enriched GUL-1-GFP
NCU07300	Q7S968	asparagine synthetase domain-containing protein 1	5.6493	4.53356e-05	0.00832992	4.78611	0.0489107	0.0985424	-0.85161	0.361968	1	1.17693	0.339156	0.425745	Enriched wild-type
NCU15608	#N/A		7.71983	0.000116694	0.0133887	8.69093	0.00639413	0.0328175	6.19564	0.0031606	0.707943	6.57597	0.00267734	0.00962567	Enriched wild-type	Enriched GUL-1-GFP
NCU10683	A7UWL5	NRS/ER	-6.8944	0.0287679		-0.135138	0.976417		-0.232737	0.93553	1	0	1
NCU05040	Q7RX48	hypothetical protein	-6.58658	0.247605		0.862011	0.915184		0	1	1	0	1
NCU07036	Q7S9A0	hypothetical protein	-6.49594	0.254221		0	1		0	1	1	0	1
NCU06961	Q7SAI8	exopolygalacturose	-6.41479	0.260249		0	1		2.53075	0.656799	1	0	1
NCU08640	Q7SFI1	hypothetical protein	-6.20832	0.276037		0	1		0	1	1	0	1
NCU10185	F5HCY3	tR isopentenyltransferase	-6.18893	0.245334		2.47622	0.743143		0	1	1	0.890872	0.881011
NCU16680	U9W534	hypothetical protein	-6.10036	0.0307719		1.90189	0.639005		0.0631737	0.979853	1	0.093696	0.976608
NCU10897	A7UWS0	hypothetical protein	-6.08676	0.285636		0.775551	0.923675		-3.91267	0.490718	1	0	1
NCU02654	Q7SH74	glycosyl hydrolase family 88	-6.08676	0.285636		-0.996714	0.902399		-2.62907	0.643719	1	0	1
NCU00221	U9W8F8	hypothetical protein	-6.08676	0.285636		-0.996714	0.902399		0	1	1	0	1
NCU16209	#N/A		-6.04531	0.134373		-2.22283	0.703564		-0.87693	0.820447	1	-0.35706	0.937549
NCU01784	V5IR27	pseudouridylate synthase 3, variant	-5.94833	0.296845		0.419514	0.958697		2.8111	0.621117	1	1.12768	0.859356
NCU05788	Q7S5Q5	hypothetical protein	-5.94832	0.296845		-0.396263	0.961074		0	1	1	0.856273	0.893043
NCU00563	Q7SF86	hypothetical protein	-5.94831	0.296847		2.09063	0.795916		0	1	1	-0.919516	0.886248
NCU09441	V5IKF8	hypothetical protein	-5.9483	0.296848		0.775551	0.923675		0	1	1	0	1
NCU16562	V5IPJ3	hypothetical protein	-5.9483	0.296848		0	1		1.80023	0.753215	1	0	1
NCU07948	Q7S936	hypothetical protein	-5.93553	0.241539		0.485605	0.946287		-1.03238	0.833297	1	0.136499	0.980821
NCU17322	#N/A		-5.88424	0.302134		0	1		0	1	1	0	1
NCU15133	#N/A		-5.88424	0.302134		-2.22707	0.78474		1.27892	0.824093	1	-5.17443	0.416557
NCU15093	#N/A		-5.88424	0.302134		-2.22707	0.78474		-1.29779	0.822061	1	0	1
NCU12067	V5IMY6	hypothetical protein	-5.88258	0.110047		1.29149	0.805645		1.83113	0.622361	1	-1.72927	0.66446
NCU06683	Q1K751	hypothetical protein	-5.80367	0.0362726		0.326286	0.935095		-1.43252	0.557518	1	1.10467	0.720415
NCU07990	Q7SAQ0	hypothetical protein	-5.78712	0.310271		0.56198	0.944674		0	1	1	0.371939	0.953502
NCU15345	#N/A		-5.78709	0.310273		0	1		4.87973	0.388469	1	0	1
NCU14062	#N/A		-5.78709	0.310273		0	1		2.48956	0.66211	1	0	1
NCU09914	Q7S142	hypothetical protein	-5.76883	0.0862305		-2.00254	0.653546		2.84813	0.393521	1	0.357939	0.919061
NCU02042	Q7SF36	hypothetical protein	-5.73627	0.161847		1.371	0.814145		3.62061	0.372099	1	1.7409	0.702544
NCU00782	Q7SFU8	pantothete transporter liz1	-5.67771	0.0812681		0.899209	0.84692		-0.29781	0.921081	1	1.14958	0.751005
NCU16220	#N/A		-5.64152	0.0535897		-0.485803	0.908806		-2.43366	0.38821	1	-1.06051	0.753804
NCU14055	#N/A		-5.59354	0.326926		0	1		2.05152	0.718078	1	0.149302	0.981343
NCU16715	U9W5I8	hypothetical protein	-5.59353	0.326926		-1.70059	0.834578		2.53075	0.656799	1	-0.362664	0.954827
NCU15138	#N/A		-5.59351	0.326928		-5.53198	0.491001		-6.25086	0.268981	1	0	1
NCU00886	V5IR02	hypothetical protein	-5.59351	0.326929		1.79722	0.824089		2.45088	0.667111	1	0	1
NCU16221	#N/A		-5.59351	0.326929		-0.996714	0.902399		-3.22968	0.56911	1	0	1
NCU01802	Q1K546	hypothetical protein	-5.59351	0.326929		0	1		4.32095	0.445426	1	0	1
NCU06058	Q7S4Z2	amidohydrolase 2	-5.59351	0.326929		-0.760229	0.925443		-2.53078	0.6583	1	0	1
NCU02735	Q7SGB4	hypothetical protein	-5.59351	0.326929		0.24257	0.97612		0	1	1	0	1
NCU07164	Q1K5X2	hypothetical protein	-5.59351	0.326929		0.24257	0.97612		0	1	1	0	1
NCU16501	V5IP59	hypothetical protein	-5.59351	0.326929		-1.70051	0.834586		0	1	1	0	1
NCU14116	#N/A		-5.59351	0.326929		0	1		0	1	1	0	1
NCU02529	Q7SHT4	hypothetical protein	-5.58718	0.304787		-0.392626	0.959605		1.37829	0.795449	1	0	1
NCU03157	Q7SEX4	hypothetical protein	-5.58668	0.169635		-1.27693	0.827043		-2.52721	0.531946	1	0.762619	0.866537
NCU14170	#N/A		-5.56397	0.238319		0.377003	0.955207		-0.924917	0.839206	1	0	1
NCU04532	Q7RY32	hypothetical protein	-5.55541	0.218371		1.1981	0.85173		0.13767	0.97504	1	0.140346	0.977846
NCU15293	#N/A		-5.50649	0.00315512		-1.14301	0.69883		-1.54332	0.266559	1	-4.15525	0.0842994	0.137301
NCU07917	Q7SA01	hypothetical protein	-5.44845	0.0789886		-1.532	0.7052		-0.360862	0.901259	1	3.0129	0.377655
NCU09964	Q7S1J1	hypothetical protein	-5.42494	0.341906		0	1		0	1	1	-0.185951	0.976804
NCU16895	V5IMU6	hypothetical protein	-5.34976	0.348728		0	1		3.48858	0.538601	1	1.27775	0.840823
NCU15008	#N/A		-5.34971	0.348733		0	1		-0.498889	0.928772	1	0	1
NCU15155	#N/A		-5.34971	0.348733		-0.996714	0.902399		-1.97334	0.731657	1	0	1
NCU15383	#N/A		-5.34971	0.348733		-1.29493	0.873502		0.625767	0.913647	1	0	1
NCU14096	#N/A		-5.34971	0.348733		-1.29493	0.873502		0	1	1	0	1
NCU09865	Q7S5Y9	methylase	-5.34971	0.348733		0	1		0.625767	0.913647	1	0	1
NCU15799	#N/A		-5.34971	0.348733		0	1		0	1	1	0	1
NCU16494	V5IRB5	hypothetical protein	-5.34971	0.348733		0	1		0	1	1	0	1
NCU17274	V5ILQ9	hypothetical protein	-5.3435	0.330345		0.692605	0.929121		-3.0341	0.57987	1	1.16805	0.848569
NCU15282	#N/A		-5.34239	0.327342		0	1		1.83075	0.731411	1	0	1
NCU08769	P34762	conidiation-specific protein 6	-5.28974	0.214375		0.956794	0.874352		2.00619	0.622332	1	0	1
NCU15122	#N/A		-5.21591	0.12452		-7.53213	0.09895		-1.09999	0.72596	1	0	1
NCU08564	Q7SB30	hypothetical protein	-5.20271	0.00683547		2.96219	0.285133		-0.269775	0.841452	1	2.7227	0.190519
NCU06304	Q7SAC6	HET domain-containing protein	-5.15958	0.083676		2.22675	0.59915		0.240454	0.929191	1	0	1
NCU15322	#N/A		-5.01602	0.380076		-1.70054	0.834582		0.609969	0.915355	1	-1.75349	0.785773
NCU15193	#N/A		-5.01601	0.380077		0	1		0	1	1	0	1
NCU15306	#N/A		-5.01601	0.380077		0	1		0	1	1	0	1
NCU15677	#N/A		-5.01601	0.380077		0	1		0	1	1	0	1
NCU15353	#N/A		-5.01601	0.380077		0	1		1.38601	0.809485	1	0	1
NCU15135	#N/A		-5.01601	0.380077		-1.70051	0.834586		0	1	1	0	1
NCU15263	#N/A		-5.01601	0.380077		0	1		-1.29779	0.822061	1	0	1
NCU15089	#N/A		-5.01601	0.380077		0	1		-0.54147	0.923113	1	0	1
NCU15326	#N/A		-5.01601	0.380077		0	1		0.247542	0.965097	1	0	1
NCU15337	#N/A		-4.98424	0.313218		-2.22564	0.752979		2.59295	0.596145	1	-1.75355	0.75407
NCU16213	#N/A		-4.98295	0.310849		-0.75164	0.914513		-0.663898	0.889856	1	-1.09006	0.844269
NCU16227	#N/A		-4.97838	0.302698		-1.69409	0.806141		-0.109633	0.981353	1	0	1
NCU16224	#N/A		-4.84067	0.145066		-3.24072	0.475605		-0.569705	0.856315	1	-1.07037	0.777468
NCU15108	#N/A		-4.79044	0.112872		0	1		-1.42019	0.597891	1	0	1
NCU15101	#N/A		-4.75859	0.0964392		-1.96169	0.638548		-1.30175	0.603936	1	0	1
NCU14003	#N/A		-4.70395	0.268791		-1.07884	0.861275		-0.336016	0.939061	1	0	1
NCU15662	#N/A		-4.56392	0.106692		0	1		-1.69278	0.537672	1	0.0948009	0.976402
NCU15667	#N/A		-4.47738	0.432139		0	1		0	1	1	-0.436883	0.945621
NCU15321	#N/A		-4.31335	0.178732		-2.21776	0.637082		2.17494	0.470333	1	-1.75367	0.637968
NCU16215	#N/A		-4.25786	0.0670668		-0.200681	0.953581		-0.00413202	0.998375	1	-1.36607	0.608104
NCU17126	V5INC7	hypothetical protein	-4.17883	0.383701		0	1		2.05594	0.668093	1	-0.36038	0.94698
NCU06878	Q7S3H5	hypothetical protein	-4.15493	0.463344		0.366104	0.963956		0	1	1	0	1
NCU10055	Q9UW81	opsin-1	-4.10416	0.272839		1.7337	0.750474		-2.44304	0.501846	1	0.376601	0.930047
NCU15290	#N/A		-3.9556	0.00702311		-3.54714	0.126458		-0.940057	0.409357	1	-1.16084	0.566997	0.647707
NCU16594	V5INL0	hypothetical protein	-3.94732	0.374996		-0.0187743	0.997665		3.3902	0.447241	1	0.0537045	0.991501
NCU09973	Q7S0L3	hypothetical protein	-3.89922	0.280179		1.834	0.726815		0.78977	0.821317	1	0.149779	0.971137
NCU08522	Q7SAV9	hypothetical protein	-3.8301	0.383175		-0.0182515	0.997713		2.81216	0.526818	1	-0.359041	0.943024
NCU14138	#N/A		-3.82751	0.0852644		2.32562	0.479044		-0.412559	0.82304	1	0.0743759	0.977097
NCU09402	Q7S290	hypothetical protein	-3.82053	0.415057		0	1		1.03475	0.82222	1	-0.588498	0.912379
NCU16328	V5INT4	hypothetical protein	-3.80015	0.50269		-0.0417013	0.995897		0.409217	0.941625	1	0	1
NCU07206	V5IPN4	hypothetical protein	-3.79243	0.484647		0.253505	0.973952		0	1	1	-0.594858	0.922875
NCU15078	#N/A		-3.63452	0.523257		-1.8886	0.816721		-1.29779	0.822061	1	-1.7535	0.785772
NCU16223	#N/A		-3.61648	0.0539361		-6.6402	0.0072848		-1.58349	0.356213	1	-4.79363	0.0286293
NCU15246	#N/A		-3.60231	0.139201		-0.415703	0.908766		-1.93811	0.365606	1	-4.2095	0.127591
NCU04205	Q1K7D2	acid proteise	-3.59279	0.226161		1.60635	0.711303		-0.258207	0.927505	1	1.74598	0.603768
NCU15301	#N/A		-3.59001	0.530079		0	1		2.07513	0.716417	1	-0.919559	0.886242
NCU15613	#N/A		-3.58998	0.530082		-1.8886	0.816721		0	1	1	-1.75353	0.785768
NCU15607	#N/A		-3.58998	0.530082		-0.996749	0.902395		0	1	1	-1.75352	0.78577
NCU15270	#N/A		-3.58998	0.530083		-2.2271	0.784737		0.723925	0.899501	1	-1.75349	0.785773
NCU15088	#N/A		-3.58996	0.530086		0	1		0	1	1	0	1
NCU15651	#N/A		-3.58996	0.530086		0	1		0	1	1	0	1
NCU16939	V5ILV6	hypothetical protein	-3.58996	0.530086		0	1		0	1	1	0	1
NCU00783	Q7SFU7	hypothetical protein	-3.58995	0.530086		-1.70051	0.834586		0	1	1	0	1
NCU15659	#N/A		-3.58995	0.530086		-2.22707	0.78474		0	1	1	0	1
NCU15657	#N/A		-3.58995	0.530086		-0.686482	0.932649		-2.44516	0.669403	1	0	1
NCU15644	#N/A		-3.58995	0.530086		-1.18609	0.884024		0	1	1	0	1
NCU15684	#N/A		-3.58995	0.530086		-0.208101	0.979538		-1.29779	0.822061	1	0	1
NCU15027	#N/A		-3.58995	0.530086		0	1		0.723925	0.899501	1	0	1
NCU15376	#N/A		-3.58995	0.530086		-0.760229	0.925443		0.640746	0.909067	1	0	1
NCU07615	Q7SB39	hypothetical protein	-3.58995	0.530086		0.942823	0.907256		2.07513	0.716417	1	0	1
NCU16222	#N/A		-3.58995	0.530086		-1.29493	0.873502		-1.16213	0.838013	1	0	1
NCU15011	#N/A		-3.58995	0.530086		-2.22707	0.78474		-1.75545	0.758658	1	0	1
NCU16205	#N/A		-3.56759	0.0198648		-1.89964	0.310137		-1.86868	0.124741	1	-3.46809	0.0374939	0.0721219
NCU00138	Q7RWV5	pheromone receptor pre-1	-3.51667	0.0404615		5.53747	0.045386		-0.745254	0.596546	1	5.51164	0.00765645	0.021677		Enriched GUL-1-GFP
NCU07578	Q7S114	peroxisomal adenine nucleotide transporter 1	-3.46255	0.319872		2.26281	0.658477		-0.343452	0.919958	1	1.98597	0.618847
NCU17113	V5IKR2	hypothetical protein	-3.44597	0.0826627	0.370818	3.13589	0.309683		-1.28589	0.432873	1	1.52063	0.520517	0.604478
NCU16021	M1RV35	laglidadg endonuclease	-3.41544	0.0011445	0.0414511	-1.77133	0.199066	0.312491	-1.73566	0.0691476	1	-3.69505	0.000849828	0.00404338
NCU07133	Q7S6B9	metallo-beta-lactamase superfamily protein	-3.40454	0.513504		0.246876	0.973704		3.16065	0.546442	1	-0.361614	0.951263
NCU16001	Q35137	DH dehydrogese subunit 2	-3.32978	0.00418235	0.0833708	-3.97002	0.00736945	0.0348749	-3.6424	0.000490202	0.448209	-3.14314	0.00862367	0.0236889
NCU01610	Q1K559	hypothetical protein	-3.32751	0.296732		1.11699	0.804214		-1.90999	0.526549	1	1.56147	0.655018
NCU05316	Q7S8L8	pfs domain-containing protein	-3.30813	0.0171164		3.55353	0.168209		-0.487306	0.669457	1	3.91709	0.0402404	0.0763555
NCU09853	Q7S1B2	hypothetical protein	-3.30194	0.205997		1.07592	0.785659		-2.5477	0.303749	1	1.65154	0.58796
NCU06121	Q7S5G7	hypothetical protein	-3.29324	0.564218		-0.996826	0.902388		-2.18945	0.702963	1	0.371941	0.953502
NCU15255	#N/A		-3.29321	0.564222		0	1		-1.29779	0.822061	1	-1.09435	0.864943
NCU15681	#N/A		-3.29319	0.564224		-2.2271	0.784737		0.625767	0.913647	1	-1.75352	0.78577
NCU15373	#N/A		-3.29319	0.564224		-1.70054	0.834582		-1.36045	0.812443	1	-1.75348	0.785775
NCU15168	#N/A		-3.29318	0.564226		0	1		0	1	1	0	1
NCU15218	#N/A		-3.29318	0.564226		0	1		0	1	1	0	1
NCU15682	#N/A		-3.29318	0.564226		0	1		0	1	1	0	1
NCU15718	#N/A		-3.29318	0.564226		-5.53198	0.491001		0	1	1	0	1
NCU15318	#N/A		-3.29318	0.564226		-2.22707	0.78474		-1.29779	0.822061	1	0	1
NCU16202	#N/A		-3.29318	0.564226		-1.70051	0.834586		0	1	1	0	1
NCU15371	#N/A		-3.29317	0.564226		-2.22707	0.78474		-0.336014	0.953567	1	0	1
NCU05147	Q1K595	hypothetical protein	-3.29317	0.564226		-0.760229	0.925443		-2.18945	0.702963	1	0	1
NCU15650	#N/A		-3.29317	0.564226		-1.88858	0.816723		2.40366	0.673239	1	0	1
NCU16207	#N/A		-3.29317	0.564226		-1.70051	0.834586		-0.336014	0.953567	1	0	1
NCU15256	#N/A		-3.29317	0.564227		-0.386519	0.962029		-1.65431	0.772347	1	0	1
NCU04560	Q7S249	hypothetical protein	-3.2854	0.551117		0.244449	0.975067		-0.293442	0.956604	1	0	1
NCU15128	#N/A		-3.26278	0.26242		-2.21427	0.600705		0.0443837	0.986093	1	-0.51859	0.874117
NCU16212	#N/A		-3.25597	0.506209		-0.196058	0.97755		-0.944293	0.843291	1	0	1
NCU09669	V5ILW1	hypothetical protein	-3.25416	0.565613		-1.70051	0.834586		3.67481	0.516928	1	0	1
NCU05414	F5HAA2	hypothetical protein	-3.24818	0.554872		1.62638	0.836032		-4.65062	0.398064	1	0	1
NCU06070	Q7S4Y0	hypothetical protein	-3.2461	0.492554		0.783954	0.906972		1.68693	0.711853	1	0	1
NCU16005	P23351	mitochondrial ribosomal protein S5	-3.22292	0.000929296	0.0374419	-4.55075	0.000391609		-1.03659	0.249363	1	-5.11674	3.64243e-06	5.26455e-05
NCU15136	#N/A		-3.20718	0.372923		0	1		0.198242	0.954447	1	0	1
NCU03172	Q7SEW0	hypothetical protein	-3.2052	0.139615		1.95841	0.570998		1.90622	0.383627	1	1.4403	0.588222
NCU15186	#N/A		-3.19838	0.434077		0	1		-0.135329	0.972136	1	-1.7536	0.70664
NCU01114	Q1K770	DUF858 domain-containing protein	-3.19201	0.5712		0.943578	0.907182		-4.62659	0.414217	1	0	1
NCU15182	#N/A		-3.17569	0.450844		0	1		0.471102	0.908538	1	0	1
NCU04748	Q7S6A5	hypothetical protein	-3.14855	0.230356		2.4937	0.527809		0.292945	0.903893	1	1.0011	0.74485
NCU14070	#N/A		-3.12967	0.127283		3.08986	0.348885		-0.0775119	0.96644	1	1.6411	0.517439	0.601883
NCU15098	#N/A		-3.0958	0.336772		-3.69627	0.401921		-0.944945	0.748719	1	0	1
NCU02855	Q7SDQ1	endo-1,4-beta-xylase A	-3.09115	0.345156		1.63059	0.733697		1.41212	0.656643	1	0.155715	0.967101
NCU00093	Q7RYN5	hypothetical protein	-3.0809	0.589247		-0.2082	0.979529		0	1	1	0.149284	0.981346
NCU04501	Q7RYA6	hypothetical protein	-3.08089	0.589248		-0.38661	0.96202		0	1	1	-0.0629591	0.99214
NCU08773	Q1K4U7	hypothetical protein	-3.08089	0.589248		0	1		0	1	1	-0.185944	0.976805
NCU10110	A7UWK3	3-hydroxyisobutyrate dehydrogese	-3.08088	0.589249		-0.500422	0.950861		-0.62381	0.911963	1	-0.362605	0.954834
NCU16898	V5IPL1	hypothetical protein	-3.08088	0.589249		0.126516	0.987547		2.07513	0.716417	1	-0.362639	0.95483
NCU09691	Q1K6J9	hypothetical protein	-3.08087	0.58925		0	1		2.07513	0.716417	1	-0.596553	0.92588
NCU15262	#N/A		-3.08086	0.589252		-0.564053	0.944628		3.52946	0.533803	1	-1.09427	0.864952
NCU00907	Q7SCH9	hypothetical protein	-3.08081	0.589258		0	1		0	1	1	0	1
NCU04471	Q7RYD6	hypothetical protein	-3.08081	0.589258		0	1		0	1	1	0	1
NCU04939	Q7S3S8	hypothetical protein	-3.08081	0.589258		0	1		0	1	1	0	1
NCU05630	Q7S5X6	cupin domain-containing protein	-3.08081	0.589258		0	1		0	1	1	0	1
NCU07983	Q7SAQ6	hypothetical protein	-3.08081	0.589258		0	1		0	1	1	0	1
NCU16708	U9WHC9	hypothetical protein	-3.08081	0.589258		0	1		0	1	1	0	1
NCU16929	V5IMH1	hypothetical protein	-3.08081	0.589258		0	1		0	1	1	0	1
NCU16380	V5IQL2	hypothetical protein	-3.08081	0.589258		0	1		3.0133	0.595915	1	0	1
NCU09445	Q7S1X0	Cip2	-3.08081	0.589258		0	1		2.07513	0.716417	1	0	1
NCU01880	Q7SHC6	hypothetical protein	-3.08081	0.589258		-0.760229	0.925443		0	1	1	0	1
NCU16411	V5IQA4	hypothetical protein	-3.08081	0.589258		-0.760229	0.925443		0	1	1	0	1
NCU15614	#N/A		-3.08081	0.589258		0	1		1.49132	0.795149	1	0	1
NCU07614	Q7SB40	hypothetical protein	-3.08081	0.589258		-1.29493	0.873502		0	1	1	0	1
NCU15407	#N/A		-3.08081	0.589258		0	1		1.27892	0.824093	1	0	1
NCU15039	#N/A		-3.08081	0.589258		0	1		0.625767	0.913647	1	0	1
NCU15620	#N/A		-3.08081	0.589258		-0.0274841	0.997296		0.625767	0.913647	1	-4.15232	0.519767
NCU03202	Q7SGW7	hypothetical protein	-3.08081	0.589258		-0.396128	0.961087		2.07513	0.716417	1	0	1
NCU15641	#N/A		-3.07201	0.565142		0.0981045	0.989755		-0.61544	0.908722	1	0	1
NCU08921	Q1K669	hypothetical protein	-3.06921	0.431099		2.07187	0.716054		-1.21673	0.752927	1	0	1
NCU00524	Q7SCL3	hypothetical protein	-3.05879	0.304005		1.24714	0.776559		-0.121722	0.965457	1	0.864964	0.800609
NCU04285	Q1K784	hypothetical protein	-3.05553	0.359098		1.55035	0.752527		0.636499	0.843436	1	0	1
NCU16418	V5IRN8	hypothetical protein	-3.05459	0.588755		0.366104	0.963956		-1.84764	0.741998	1	0	1
NCU16463	V5IQA0	hypothetical protein	-3.05341	0.559697		-1.89338	0.800405		-0.521557	0.918446	1	-1.75346	0.767486
NCU01404	Q7S731	R methyltransferase	-3.05265	0.202014		0.752873	0.839044		0.349989	0.877956	1	2.70334	0.338074
NCU04690	Q7S5U1	hypothetical protein	-3.02557	0.503182		-0.0260688	0.996848		0.0298673	0.994693	1	0	1
NCU09049	Q7S1V0	hypothetical protein	-3.02067	0.113127		3.50877	0.265353		0.655501	0.703519	1	-0.0811854	0.967734	0.981765
NCU15760	#N/A		-3.01993	0.264867		0.684314	0.865805		-0.59253	0.829274	1	-2.76288	0.327041
NCU11046	V5IL74	hypothetical protein, variant	-3.006	0.551238		0.371465	0.959512		-0.851773	0.864979	1	0	1
NCU14067	#N/A		-3.00494	0.304548		0.989426	0.818291		0.925387	0.746716	1	2.28275	0.491765
NCU07586	Q7SBH0	hypothetical protein	-3.00383	0.0221906		-4.33401	0.0140351		-1.46985	0.242568	1	-2.77345	0.0678206	0.115271
NCU06025	P11635	shikimate/quite 5-dehydrogese	-3.00324	0.593717		0.242483	0.976129		0	1	1	-0.185844	0.976818
NCU06037	Q7S4E8	hypothetical protein	-3.00133	0.508709		1.17128	0.858079		4.77809	0.294197	1	0.0533873	0.991758
NCU01246	Q1K6K4	urease accessory protein UreD	-2.98819	0.41131		1.77931	0.739747		-0.389961	0.916587	1	-2.13267	0.596788
NCU16206	#N/A		-2.98192	0.255026		0.590688	0.873788		-3.6194	0.135919	1	-0.464591	0.874903
NCU14009	#N/A		-2.98114	0.182086		-3.96603	0.166594		-2.13781	0.32331	1	1.47668	0.584389
NCU02474	Q7SG90	outer mitochondrial membrane translocase 5	-2.95393	0.164507		2.81604	0.402433		-0.590552	0.756624	1	0	1
NCU03328	Q1K4Q1	endoglucase II	-2.93263	0.10752		3.91879	0.207013		-0.346877	0.835802	1	2.05468	0.386374	0.474307
NCU16217	#N/A		-2.91	0.265394		0.991868	0.798605		-0.842302	0.725391	1	0	1
NCU03049	Q7SD22	flavin-binding monooxygese	-2.89059	0.441432		1.82272	0.737552		-0.540123	0.881546	1	0.879546	0.836633
NCU14064	#N/A		-2.87621	0.611039		0	1		-0.637788	0.910373	1	0	1
NCU09543	Q7S2B8	PQ loop repeat protein	-2.85674	0.339256		3.53388	0.434093		0.541555	0.853906	1	1.54343	0.661273
NCU16216	#N/A		-2.8427	0.406933		-0.715731	0.884559		0.914572	0.775254	1	0.247798	0.948448
NCU15408	#N/A		-2.83883	0.418367		0.983531	0.846396		-0.336017	0.926989	1	-0.992628	0.807133
NCU03121	Q7SFX3	hypothetical protein	-2.80366	0.547001		0.783465	0.907666		-3.74862	0.427533	1	1.99737	0.70556
NCU01374	Q1K708	CutC family protein	-2.78427	0.513763		3.29685	0.594725		-0.89022	0.834642	1	0	1
NCU15243	#N/A		-2.78421	0.378098		-0.893569	0.844616		-1.82306	0.530064	1	-1.75367	0.631383
NCU15074	#N/A		-2.77518	0.62601		-1.88858	0.816723		-1.48338	0.795617	1	0	1
NCU07822	Q7SBE2	hypothetical protein	-2.77015	0.169642		2.75887	0.377649		0.135517	0.936398	1	-1.302	0.531956
NCU03018	Q7SGZ8	small nucleolar ribonucleoprotein complex subunit	-2.74948	0.0501515		-2.23042	0.260377		0.441949	0.750956	1	1.66223	0.417009
NCU10155	Q7S126	D polymerase epsilon subunit B	-2.71427	0.164158		3.77361	0.247039		0.638745	0.746339	1	3.56203	0.150791
NCU17016	V5IN91	hypothetical protein	-2.70784	0.345712		2.57378	0.527612		-2.7239	0.322191	1	0.975855	0.758768
NCU16201	#N/A		-2.70376	0.247582		-1.20932	0.738453		-1.54924	0.463186	1	0	1
NCU16959	V5IML3	hypothetical protein, variant	-2.70177	0.446906		1.43116	0.783384		2.88059	0.415849	1	1.12148	0.782876
NCU16011	Q35136	hypothetical protein	-2.69981	0.00237763	0.0580344	-3.95341	0.000683847	0.00821078	-1.04216	0.200046	1	-6.05001	9.68833e-10	3.15862e-08
NCU09530	Q7S0H9	hypothetical protein	-2.69414	0.509626		-1.27882	0.831208		-1.14168	0.775003	1	0	1
NCU08670	Q7S8W5	hypothetical protein	-2.69138	0.148767		5.36037	0.0861034		0.85719	0.644267	1	6.25586	0.00806341	0.0224492		Enriched GUL-1-GFP
NCU07186	Q1K5V7	hypothetical protein	-2.679	0.633041		0	1		2.07513	0.716417	1	-0.362628	0.954831
NCU17275	V5IKQ7	hypothetical protein, variant	-2.6753	0.365929		1.79865	0.687326		0.0750719	0.979	1	0.161168	0.963477
NCU01385	Q1K700	hypothetical protein	-2.66911	0.639058		-0.39631	0.961069		0	1	1	2.10356	0.740588
NCU02928	Q7SHH6	hypothetical protein	-2.6691	0.639059		0	1		-1.63965	0.771056	1	1.89974	0.765002
NCU00189	Q7RX98	hypothetical protein	-2.66909	0.63906		-0.396294	0.961071		-2.77403	0.62716	1	1.67076	0.792703
NCU15618	#N/A		-2.66907	0.639063		-1.70064	0.834574		0.625767	0.913647	1	0.942915	0.882269
NCU16502	V5IQT5	hypothetical protein	-2.66907	0.639063		1.03024	0.898689		0	1	1	0.902341	0.887312
NCU04064	Q7RZF4	hypothetical protein	-2.66906	0.639064		1.58531	0.844577		0	1	1	0.634373	0.920706
NCU05880	Q7S528	hypothetical protein	-2.66903	0.639068		0	1		3.05151	0.591206	1	-0.185884	0.976813
NCU06023	P05195	catabolic 3-dehydroquise	-2.66902	0.639069		-1.29501	0.873495		-4.54246	0.422841	1	-0.596489	0.925888
NCU15198	#N/A		-2.66902	0.639069		-1.29501	0.873495		-2.18945	0.702963	1	-0.596527	0.925884
NCU03427	Q7RXU4	hypothetical protein	-2.66901	0.639071		0	1		0	1	1	-1.09435	0.864942
NCU01027	F5HB01	hypothetical protein	-2.66896	0.639078		0	1		0	1	1	0	1
NCU04060	Q7RZF7	hypothetical protein	-2.66896	0.639078		0	1		0	1	1	0	1
NCU07520	Q7S1A0	endo-1,4-beta-glucase	-2.66896	0.639078		0	1		0	1	1	0	1
NCU08102	Q7SGI2	hypothetical protein	-2.66896	0.639078		0	1		0	1	1	0	1
NCU15631	#N/A		-2.66896	0.639078		0	1		0	1	1	0	1
NCU16854	V5INU2	hypothetical protein	-2.66896	0.639078		0	1		0	1	1	0	1
NCU03242	Q7SCM9	serine/threonine-protein kise cbk1	-2.66896	0.639078		0	1		2.53075	0.656799	1	0	1
NCU15057	#N/A		-2.66896	0.639078		0	1		2.07513	0.716417	1	0	1
NCU08103	Q7SGI1	hypothetical protein	-2.66896	0.639078		-1.18609	0.884024		0	1	1	0	1
NCU12085	V5IN12	hypothetical protein	-2.66896	0.639078		-1.18609	0.884024		0	1	1	0	1
NCU16529	V5IP96	hypothetical protein	-2.66896	0.639078		0	1		1.49132	0.795149	1	0	1
NCU02040	Q1K912	hypothetical protein	-2.66896	0.639078		-1.29493	0.873502		0	1	1	0	1
NCU04694	Q7S5X3	hypothetical protein	-2.66896	0.639078		-1.70051	0.834586		0	1	1	0	1
NCU02817	Q7SEJ8	hypothetical protein	-2.66896	0.639078		0	1		0.625767	0.913647	1	0	1
NCU07622	Q7SB03	hypothetical protein	-2.66896	0.639078		-0.760229	0.925443		2.53075	0.656799	1	0	1
NCU06134	Q7S5F4	hypothetical protein	-2.66896	0.639078		-0.760229	0.925443		2.07513	0.716417	1	0	1
NCU08470	Q7RUL5	hypothetical protein	-2.66896	0.639078		-0.996714	0.902399		2.07513	0.716417	1	0	1
NCU02878	Q7SHM6	hypothetical protein	-2.66896	0.639078		-0.208101	0.979538		0	1	1	0	1
NCU12050	V5IKB6	hypothetical protein	-2.66896	0.639078		-0.208101	0.979538		0	1	1	0	1
NCU16911	V5IME0	hypothetical protein	-2.66895	0.639078		0.50569	0.950214		3.38846	0.550439	1	0	1
NCU00825	Q7SEA9	hypothetical protein	-2.66895	0.639078		0	1		0.649977	0.907485	1	0	1
NCU00307	Q7RZQ7	hypothetical protein	-2.66895	0.639078		0.683571	0.932714		1.98872	0.727924	1	0	1
NCU16421	V5IPX8	hypothetical protein	-2.66895	0.639078		-0.386519	0.962029		-2.18945	0.702963	1	0	1
NCU09196	Q7S3A7	hypothetical protein	-2.66587	0.330003		2.94922	0.447284		0.220123	0.927226	1	3.54284	0.234978
NCU05609	Q7S6V6	hypothetical protein	-2.62615	0.599744		1.54576	0.828151		-3.93942	0.429662	1	1.79002	0.748704
NCU03603	Q8X0J4	cytochrome b5	-2.62052	0.327933		2.44913	0.547301		-0.207885	0.934547	1	0.0644942	0.983988
NCU16010	Q35135	laglidadg endonuclease	-2.61862	0.00236266	0.0580344	-3.65693	0.0012174	0.0122222	-0.828532	0.29541	1	-3.28456	0.000293472	0.0017677
NCU06337	Q7S9W9	hypothetical protein	-2.61582	0.04088		2.28379	0.373241		0.0547962	0.96619	1	-0.538383	0.740083
NCU01074	V5IM74	hypothetical protein	-2.61412	0.585363		1.72498	0.803047		1.45609	0.760539	1	0	1
NCU03884	Q7RXG6	hypothetical protein	-2.60375	0.261013		2.05049	0.58102		-0.127343	0.954292	1	0.65225	0.821923
NCU10031	Q7S0E7	monooxygese	-2.59245	0.57313		0.133664	0.983786		3.94817	0.387647	1	3.04522	0.55248
NCU08274	V5IM64	hypothetical protein	-2.58699	0.580832		-0.0291097	0.996594		-4.60548	0.331383	1	0.888134	0.867908
NCU00312	Q7RZQ2	hypothetical protein	-2.58457	0.567383		1.92021	0.765414		0.0165206	0.997055	1	1.40395	0.780973
NCU17055	V5IKS0	hypothetical protein	-2.58134	0.565062		1.44712	0.82095		3.50937	0.431649	1	1.09148	0.827814
NCU15623	#N/A		-2.58041	0.174839		2.32163	0.451862		-1.52625	0.429693	1	1.60411	0.496232
NCU15646	#N/A		-2.58036	0.459387		-1.41517	0.779678		0.374712	0.914037	1	-0.784908	0.843815
NCU05849	Q7S559	hypothetical protein	-2.57845	0.562986		3.0996	0.62507		0	1	1	2.20395	0.657506
NCU01061	Q1K8A6	dienelactone hydrolase	-2.5708	0.266386		0.902953	0.802269		0.184961	0.932704	1	0.928048	0.738682
NCU02963	Q7SH06	c-myc binding protein	-2.56187	0.0840945		2.74938	0.327567		-0.376795	0.784427	1	0	1	1
NCU12035	V5ILC0	hypothetical protein	-2.53919	0.497806		0.272995	0.960442		-0.847754	0.81762	1	-1.07997	0.805777
NCU16009	Q35134	hypothetical protein	-2.53808	0.0151263	0.161017	-1.22215	0.396562	0.529047	-0.625782	0.507154	1	-1.9713	0.116741	0.177634
NCU08783	Q7RWY0	epoxide hydrolase	-2.53004	0.656382		-0.75389	0.926062		0	1	1	1.67853	0.791759
NCU16303	V5IQD8	hypothetical protein	-2.53003	0.656384		-1.70065	0.834573		2.8111	0.621118	1	1.24833	0.844452
NCU03279	Q7SDX6	hypothetical protein	-2.53002	0.656385		0	1		0.99822	0.859256	1	0.962604	0.879823
NCU06133	Q7S5F5	hypothetical protein	-2.53	0.656388		-0.753839	0.926067		0	1	1	0.28092	0.964885
NCU16350	V5IRF0	hypothetical protein	-2.52999	0.656388		0	1		0	1	1	0.13327	0.983348
NCU15663	#N/A		-2.52998	0.65639		0	1		0	1	1	-0.443109	0.94485
NCU15660	#N/A		-2.52996	0.656393		-0.908973	0.910937		0	1	1	-0.919548	0.886244
NCU15327	#N/A		-2.52996	0.656393		0	1		0	1	1	-1.09435	0.864943
NCU07285	Q7S982	hypothetical protein	-2.5299	0.6564		0	1		0	1	1	0	1
NCU15056	#N/A		-2.5299	0.6564		0	1		0.625767	0.913647	1	0	1
NCU00231	Q7RZY0	hypothetical protein	-2.5299	0.6564		-0.753729	0.926078		-2.53078	0.6583	1	0	1
NCU09382	Q7SCW2	TPR domain-containing protein	-2.52456	0.187957		-3.3495	0.211959		-0.770455	0.67956	1	0.202815	0.936373
NCU08631	Q7SFJ0	hypothetical protein	-2.51983	0.641998		0	1		3.70963	0.497673	1	1.89647	0.757149
NCU05017	Q7RX07	hypothetical protein	-2.50649	0.630337		-0.755618	0.919258		-4.6228	0.372702	1	-1.092	0.853306
NCU02302	Q7S568	phosphatidylserine decarboxylase	-2.49865	0.462189		1.48845	0.768916		4.01213	0.251317	1	1.74286	0.65878
NCU02038	Q1K914	hypothetical protein	-2.49748	0.24101		1.76186	0.610152		0.626336	0.779714	1	2.72985	0.299865
NCU08987	Q7S2Y2	hypothetical protein	-2.48641	0.610086		-0.751472	0.914378		-1.94757	0.682369	1	0	1
NCU04402	Q8X225	histone-lysine N-methyltransferase	-2.48606	0.36132		2.9095	0.481645		-1.28926	0.621656	1	2.39987	0.453083
NCU09683	Q7S759	hypothetical protein	-2.47799	0.14424		-3.42727	0.134746		4.31923	0.0309771	1	-1.60575	0.368724	0.456273
NCU01210	Q1K835	para-aminobenzoic acid synthetase	-2.47663	0.298231		2.54888	0.483549		3.6063	0.145139	1	4.05054	0.145145
NCU09978	Q7S0K8	hypothetical protein	-2.47195	0.498505		1.2337	0.813378		0.317124	0.926165	1	0	1
NCU01001	Q1K8E4	hypothetical protein	-2.46625	0.0786505		2.09203	0.408577		-0.0401468	0.971516	1	-0.165056	0.909503
NCU16794	V5ING4	hypothetical protein	-2.45966	0.201673		-1.41425	0.657248		0.573627	0.745694	1	-1.71077	0.481865
NCU16661	U9W4V0	hypothetical protein	-2.4571	0.438665		2.33526	0.61923		2.64085	0.409359	1	1.14079	0.75602
NCU03854	Q7RW80	D-tyrosyl-tR(Tyr) deacylase	-2.45547	0.374377		1.11649	0.790003		-0.180033	0.944598	1	0.423871	0.897127
NCU03167	Q7SEW5	hypothetical protein	-2.45522	0.581466		-0.0228607	0.997142		1.50987	0.725348	1	0	1
NCU16807	V5IML9	hypothetical protein	-2.45367	0.539943		-0.177641	0.975945		-4.5246	0.266318	1	1.75792	0.701055
NCU05069	Q7RWL5	FAD dependent oxidoreductase	-2.45196	0.662022		1.16378	0.885621		3.29608	0.561476	1	0	1
NCU15017	#N/A		-2.45093	0.666343		-2.22713	0.784734		-1.11309	0.846484	1	-0.919529	0.886246
NCU09129	Q7S2L9	hypothetical protein	-2.4424	0.145934		3.1037	0.291641		-2.14016	0.163883	1	4.0032	0.0702862	0.11862
NCU10062	Q7S050	hypothetical protein	-2.39395	0.177688		2.63895	0.38938		0.445851	0.792307	1	1.88136	0.420728
NCU01521	Q1K5J8	ThiJ/PfpI family protein	-2.39255	0.381501		1.69288	0.686012		0.891128	0.738264	1	0.167146	0.959541
NCU09074	Q7SFS5	hypothetical protein	-2.38987	0.459956		1.05915	0.819599		0.0260314	0.993148	1	2.7653	0.441084
NCU09137	Q7S2L2	hypothetical protein	-2.38981	0.126147		3.1556	0.250278		1.88199	0.187402	1	3.19498	0.119655
NCU06324	Q7SAA7	hypothetical protein	-2.38342	0.527571		1.67522	0.763414		-1.15214	0.75674	1	0	1
NCU08506	Q7SC95	hypothetical protein	-2.38067	0.456115		1.36771	0.765382		-0.754754	0.802106	1	-0.55833	0.87849
NCU06572	Q7S845	hypothetical protein	-2.37164	0.452404		0.295844	0.948204		-0.598164	0.836685	1	0.251603	0.943638
NCU05980	Q7S216	carboxypeptidase S1	-2.37139	0.600612		0.503592	0.939454		0	1	1	0.139154	0.978732
NCU04375	V5IQB1	hypothetical protein	-2.36945	0.672437		0	1		3.52567	0.534248	1	0.61561	0.923048
NCU10610	A7UX97	hypothetical protein	-2.36705	0.329546		3.41048	0.36967		-0.180703	0.943277	1	3.6775	0.207888
NCU03109	Q7SFY5	hypothetical protein	-2.36691	0.677		0	1		0	1	1	1.82361	0.774181
NCU01048	Q1K8B8	hypothetical protein	-2.36689	0.677003		0.11687	0.988497		-3.03496	0.594473	1	1.26772	0.84206
NCU09231	Q7SCU9	DUF1275 domain-containing protein	-2.36689	0.677003		-0.996854	0.902385		0	1	1	1.14221	0.857559
NCU07966	Q7S919	calcium-transporting ATPase 3	-2.36688	0.677005		1.04073	0.897661		0	1	1	0.856305	0.893039
NCU16771	V5INT5	Rpp14 family protein	-2.36686	0.677006		-0.396245	0.961076		0	1	1	0.371936	0.953502
NCU09596	Q1K8H1	phytanoyl-CoA dioxygese	-2.36686	0.677006		-0.439473	0.956836		0	1	1	0.371935	0.953502
NCU09363	Q7SCJ1	hypothetical protein	-2.36686	0.677007		1.30539	0.871796		0	1	1	0.39452	0.950678
NCU08058	Q7SGM5	3-hydroxyacyl-CoA dehydrogese	-2.36685	0.677008		-0.760332	0.925433		-3.77589	0.506212	1	0.0509634	0.993634
NCU17018	V5ILL0	hypothetical protein	-2.36684	0.67701		-0.760316	0.925435		0	1	1	-0.36268	0.954825
NCU00408	Q7RYQ2	hypothetical protein	-2.36684	0.67701		-0.56408	0.944625		-4.65073	0.411763	1	-0.362608	0.954834
NCU10538	A7UXG9	hypothetical protein	-2.36683	0.677011		0.943505	0.907189		0	1	1	-0.596516	0.925885
NCU15617	#N/A		-2.36682	0.677012		-2.22713	0.784735		0	1	1	-1.00403	0.875931
NCU10483	A7UW71	hypothetical protein	-2.36679	0.677016		0.553756	0.945483		1.80023	0.753215	1	-1.75344	0.785779
NCU02341	Q7S4S4	hypothetical protein	-2.36676	0.67702		0	1		0	1	1	0	1
NCU04627	Q7S030	hypothetical protein	-2.36676	0.67702		0	1		0	1	1	0	1
NCU06152	Q7S5D6	hypothetical protein	-2.36676	0.67702		0	1		0	1	1	0	1
NCU07254	Q7S961	hypothetical protein	-2.36676	0.67702		0	1		0	1	1	0	1
NCU07748	Q7S1T0	hypothetical protein	-2.36676	0.67702		0	1		0	1	1	0	1
NCU07916	Q7SA02	phenol 2-monooxygese	-2.36676	0.67702		0	1		0	1	1	0	1
NCU15406	#N/A		-2.36676	0.67702		0	1		0	1	1	0	1
NCU12051	V5IKG0	hypothetical protein	-2.36676	0.67702		0	1		-2.77403	0.62716	1	0	1
NCU03562	Q7RWQ1	hypothetical protein	-2.36676	0.67702		-0.760229	0.925443		0	1	1	0	1
NCU08152	Q7S496	high affinity glucose transporter	-2.36676	0.67702		-0.760229	0.925443		0	1	1	0	1
NCU06573	Q7S844	chlorogenic acid esterase	-2.36676	0.67702		0.58532	0.942378		-3.51066	0.536987	1	0	1
NCU12025	V5IKI5	hypothetical protein	-2.36676	0.67702		-0.760229	0.925443		-3.45247	0.543865	1	0	1
NCU10156	V5IL24	hypothetical protein	-2.36676	0.67702		-0.996714	0.902399		2.07513	0.716417	1	0	1
NCU05818	Q7S5M5	phosphatidyl synthase	-2.36676	0.67702		0	1		-1.32778	0.81539	1	0	1
NCU05152	Q1K590	hypothetical protein	-2.36676	0.67702		-1.18609	0.884024		1.80023	0.753215	1	0	1
NCU16387	V5IPU8	hypothetical protein	-2.36676	0.67702		0.783091	0.922934		0	1	1	0	1
NCU15217	#N/A		-2.36676	0.67702		0	1		-0.574519	0.920057	1	0	1
NCU02077	Q7SEY7	hypothetical protein	-2.36676	0.67702		-0.32421	0.96814		0	1	1	0	1
NCU16762	V5INR5	hypothetical protein	-2.36676	0.67702		-0.500334	0.95087		0	1	1	0	1
NCU01750	Q1K5R6	hypothetical protein	-2.36676	0.67702		0.862011	0.915184		4.04446	0.475303	1	0	1
NCU09293	Q7S0Q6	hypothetical protein	-2.36676	0.67702		1.63254	0.840002		-3.7759	0.506212	1	0	1
NCU05035	Q7RX53	hypothetical protein	-2.36676	0.67702		1.29387	0.872918		3.0133	0.595915	1	0	1
NCU02034	V5INW3	RIP defective	-2.36676	0.67702		1.14932	0.887035		1.80023	0.753215	1	0	1
NCU04070	Q7RZE8	hypothetical protein	-2.34833	0.661379		0.368905	0.961546		-1.48835	0.778238	1	-0.594242	0.921851
NCU16226	#N/A		-2.33615	0.301677		-0.751681	0.831836		0.171118	0.937342	1	-2.18776	0.433458
NCU09169	Q7S346	NmrA family transcriptiol regulator	-2.32435	0.642743		2.05532	0.773459		0	1	1	2.24031	0.689228
NCU01780	Q1K5P9	hypothetical protein	-2.323	0.641783		0.1154	0.987108		-1.87024	0.702166	1	0.618136	0.912198
NCU05648	Q7S612	hypothetical protein	-2.31347	0.187529		3.43369	0.235717		-0.00593672	0.996813	1	3.7498	0.0847822
NCU04072	Q7RZE7	catechol dioxygese	-2.3134	0.634852		1.49965	0.829129		4.28693	0.376605	1	0.857368	0.875322
NCU00975	Q7SGE7	hypothetical protein	-2.31138	0.121998		3.50651	0.195084		-2.45367	0.182789	1	1.205	0.488562
NCU14034	#N/A		-2.30904	0.562078		-1.41569	0.806101		-0.255678	0.947594	1	-0.0740277	0.986883
NCU07101	Q7S674	lipase	-2.30192	0.301559		-0.830915	0.785573		0.275175	0.89768	1	-0.520438	0.85435
NCU02672	Q7SH57	hypothetical protein	-2.30062	0.672543		0	1		-0.0922527	0.986398	1	0	1
NCU08223	Q7S3M0	hypothetical protein	-2.29985	0.681632		0.707045	0.930407		0	1	1	-1.09426	0.864954
NCU08126	Q7S4K5	D-lactate dehydrogese	-2.29085	0.145632		1.75251	0.540917		-0.0503774	0.974479	1	1.35131	0.535111
NCU00786	Q7SFU4	G-protein coupled receptor	-2.27107	0.606962		1.44755	0.818535		0	1	1	2.31271	0.639316
NCU00846	Q7SD93	hypothetical protein	-2.26635	0.686484		0.107297	0.989439		0	1	1	1.38973	0.827048
NCU02991	Q1K942	hypothetical protein	-2.26612	0.480012		0.290922	0.951818		0.591758	0.853022	1	0.531071	0.887542
NCU08375	Q7SGP0	molybdopterin synthase small subunit CnxG	-2.26516	0.0395644	0.255047	3.08115	0.203859		-0.690897	0.458127	1	0.415719	0.825287	0.867625
NCU15079	#N/A		-2.26206	0.315028		-1.20997	0.738984		0.500239	0.8082	1	-1.75369	0.548906
NCU15075	#N/A		-2.25999	0.327545		-0.445732	0.903407		0.471122	0.824239	1	-0.905419	0.756995
NCU14086	#N/A		-2.25262	0.596014		1.57256	0.795772		0.353622	0.931364	1	1.5583	0.74327
NCU14164	#N/A		-2.24944	0.68851		0.366104	0.963956		2.53075	0.656799	1	0	1
NCU10169	A7UXA6	hypothetical protein	-2.24788	0.196365		2.58071	0.38552		0.214975	0.890871	1	3.23248	0.148866
NCU04078	Q7RZE2	D-dependent methanol dehydrogese	-2.23859	0.588085		0.60344	0.918921		4.16135	0.310993	1	2.1705	0.638552
NCU15153	#N/A		-2.2383	0.430336		-0.47004	0.909774		0.163472	0.953466	1	-0.249571	0.938603
NCU03392	Q7RY14	hypothetical protein	-2.22978	0.583278		1.9143	0.741967		-3.53121	0.385423	1	2.64321	0.560417
NCU14090	#N/A		-2.22641	0.218074	0.576029	2.5956	0.395177		-0.181021	0.90997	1	0	1	1
NCU07336	Q7SA27	hypothetical protein	-2.22266	0.080266		2.41825	0.334793		-0.325173	0.780337	1	-1.37739	0.346498
NCU14104	#N/A		-2.2162	0.576177		1.36812	0.809669		-3.33245	0.382383	1	0	1
NCU10965	V5IP32	hypothetical protein	-2.21101	0.573515		0	1		-1.41808	0.704212	1	0	1
NCU01494	Q1K4Q4	MFS sugar transporter	-2.20655	0.691046		0.366567	0.963559		0.204244	0.970716	1	0	1
NCU02226	Q7S4G7	methylthioribose-1-phosphate isomerase	-2.20222	0.158942		3.73089	0.19144		-1.56345	0.289035	1	-0.531396	0.753926	0.81179
NCU09790	Q7S603	hypothetical protein	-2.20167	0.56878		0.393261	0.94358		4.79503	0.210308	1	2.28379	0.596862
NCU00561	Q7SF88	hypothetical protein	-2.19971	0.214841		3.66429	0.224776		0.169519	0.916077	1	3.60357	0.113909	0.174296
NCU16381	V5IRJ8	hypothetical protein	-2.18015	0.55843		1.73096	0.745914		-3.44148	0.356579	1	3.54816	0.393111
NCU08138	Q7S3Z2	cytochrome C1 heme lyase	-2.1668	0.22988		1.29991	0.672626		-0.192008	0.910133	1	1.83319	0.431373
NCU09154	Q7S0Z0	hypothetical protein	-2.16318	0.0252251		-0.375204	0.806342		-1.26834	0.181467	1	-0.0667628	0.957103	0.974609
NCU03078	Q7SDT2	hypothetical protein	-2.15941	0.549033		1.66995	0.746803		0	1	1	3.73118	0.352993
NCU01828	Q7RXN1	hypothetical protein	-2.14842	0.482267		3.05525	0.509157		4.92011	0.121286	1	3.37721	0.346734
NCU05919	Q7S0Y5	hypothetical protein	-2.14028	0.445003		1.71059	0.688715		0.934391	0.734411	1	-2.30664	0.453523
NCU05038	Q7RX50	2OG-Fe(II) oxygese	-2.14011	0.455826		-3.68072	0.344811		0.944548	0.748967	1	-0.550544	0.872299
NCU01203	Q1K839	hypothetical protein	-2.13359	0.321839		2.02082	0.566618		-0.547954	0.787732	1	0	1	1
NCU09906	Q7S150	hypothetical protein	-2.12761	0.707787		1.19637	0.882436		0	1	1	2.48376	0.695748
NCU07894	Q7S882	oligopeptide transporter 2	-2.1276	0.707788		1.40664	0.861932		0	1	1	2.31637	0.71537
NCU07517	Q7S1A3	hypothetical protein	-2.12757	0.707792		1.16674	0.885331		0	1	1	1.33016	0.834371
NCU01373	Q1K709	hypothetical protein	-2.12757	0.707793		0.775415	0.923688		2.64915	0.64163	1	1.1982	0.850639
NCU09023	Q7S2V2	laccase 2	-2.12756	0.707793		-0.208228	0.979526		2.21128	0.698409	1	0.976323	0.878119
NCU00547	Q7SFA1	hypothetical protein	-2.12756	0.707794		-0.760363	0.92543		2.8111	0.621117	1	0.892304	0.888561
NCU00961	Q7SGG1	hypothetical protein	-2.12755	0.707795		1.02066	0.899627		3.68635	0.515601	1	0.615626	0.923046
NCU09939	Q1K626	hypothetical protein	-2.12752	0.707799		0	1		0	1	1	-0.362713	0.954821
NCU16488	V5IRA0	hypothetical protein	-2.1275	0.707802		0.107377	0.989432		2.45088	0.667112	1	-0.919495	0.88625
NCU02500	Q01301	clock-controlled pheromone CCG-4	-2.12744	0.707809		0	1		0	1	1	0	1
NCU08803	Q7S8T1	general amidase GmdA	-2.12744	0.707809		0	1		0	1	1	0	1
NCU14159	#N/A		-2.12744	0.707809		0	1		-2.94271	0.605941	1	0	1
NCU16892	V5IMU1	hypothetical protein	-2.12744	0.70781		-0.996714	0.902399		-3.03496	0.594473	1	0	1
NCU07703	Q7S9K3	hypothetical protein	-2.12744	0.70781		0.683571	0.932714		0	1	1	0	1
NCU14094	#N/A		-2.12744	0.70781		0	1		2.69097	0.636306	1	0	1
NCU04593	Q7S065	Lcc9	-2.12744	0.70781		-0.396128	0.961087		0	1	1	0	1
NCU04723	Q7S6I1	hypothetical protein	-2.12744	0.70781		0.211394	0.97919		2.07513	0.716417	1	0	1
NCU10161	A7UXE9	hypothetical protein	-2.12669	0.707182		-0.0416009	0.995897		-1.45862	0.795197	1	-1.09417	0.864625
NCU07551	Q7S2Z8	hypothetical protein	-2.12606	0.231533		2.88875	0.336794		-0.746981	0.639643	1	2.37624	0.29741
NCU04555	Q7RWD6	hypothetical protein	-2.12586	0.706443		1.97505	0.80593		-0.684182	0.901182	1	2.13488	0.735431
NCU00128	Q7RWW4	hypothetical protein	-2.10942	0.694248		1.51858	0.842688		-3.26369	0.544405	1	0.903021	0.880806
NCU07427	Q7SF25	hypothetical protein	-2.10859	0.707419		-0.760229	0.925443		-0.209386	0.970313	1	0	1
NCU11399	A7UXA5	GPI mannosyltransferase 4	-2.10744	0.219196		3.5003	0.232826		0.563865	0.711185	1	4.00582	0.0693717	0.117346
NCU16449	V5IRQ9	hypothetical protein	-2.10396	0.690459		1.02313	0.892074		0.818778	0.873963	1	0	1
NCU16352	V5IQP4	hypothetical protein	-2.09856	0.46732		1.67376	0.70029		-1.30796	0.638322	1	1.71205	0.611642
NCU04884	Q7S082	alpha/beta hydrolase fold protein	-2.09684	0.68547		1.46503	0.8428		3.74676	0.468575	1	-0.183002	0.97501
NCU03762	Q7S7P5	hypothetical protein	-2.091	0.507389		1.30384	0.783844		-1.06759	0.727621	1	0	1
NCU08667	Q7S8W8	hypothetical protein	-2.09064	0.712597		-1.29506	0.87349		0	1	1	0.807148	0.89916
NCU00646	V5IRQ7	methyltransferase LaeA	-2.09062	0.712601		2.30337	0.77565		2.53075	0.656799	1	0.051007	0.993629
NCU14022	#N/A		-2.0906	0.712603		-0.143931	0.985844		2.93956	0.605052	1	-0.362613	0.954833
NCU05946	Q7S2D2	hypothetical protein	-2.0906	0.712603		-0.753807	0.926071		0	1	1	-0.596539	0.925882
NCU07204	Q1K5U2	hypothetical protein	-2.0906	0.712603		0	1		-2.53078	0.6583	1	-0.596541	0.925882
NCU05619	Q7S5S8	hypothetical protein	-2.09059	0.712604		-0.760308	0.925436		2.8111	0.621117	1	-0.596489	0.925888
NCU01025	Q1K8C7	hypothetical protein	-2.09059	0.712605		0	1		0	1	1	-0.91957	0.886241
NCU07272	Q7S944	hypothetical protein	-2.09053	0.712612		0	1		0	1	1	0	1
NCU05935	Q7S2E3	hypothetical protein	-2.09053	0.712613		-1.88858	0.816723		0	1	1	0	1
NCU17249	V5ILM3	hypothetical protein	-2.09053	0.712613		0	1		-3.13091	0.582651	1	0	1
NCU04297	Q7S7N9	hypothetical protein	-2.09033	0.712327		1.90365	0.813638		4.18862	0.459077	1	0.568157	0.928895
NCU00118	Q7RYL1	hypothetical protein	-2.08959	0.680593		1.65679	0.819091		-4.1539	0.412822	1	-0.182333	0.974615
NCU15627	#N/A		-2.08851	0.520566		-0.0892653	0.984915		-0.35597	0.909394	1	1.76166	0.628229
NCU07311	Q7SA51	hypothetical protein	-2.08653	0.173725		3.35608	0.237215		0.107483	0.940145	1	3.16134	0.13838	0.203858
NCU03918	Q1K5Z5	hypothetical protein	-2.07994	0.197973		0.570133	0.845145		-1.70207	0.319736	1	-0.794338	0.68177
NCU08644	Q7S851	hypothetical protein	-2.07646	0.672084		-0.135366	0.984647		0.291101	0.952356	1	0.990994	0.857204
NCU08376	Q7SGN9	hypothetical protein	-2.06738	0.225193		2.39531	0.411441		-0.0949539	0.95075	1	0.0819881	0.971534
NCU00365	Q7RZK1	hypothetical protein	-2.06475	0.333597		2.19174	0.529743		-2.06152	0.333107	1	2.18856	0.412701
NCU03840	Q7S741	hypothetical protein	-2.06328	0.186686		4.53207	0.104135		-0.631777	0.646979	1	4.49226	0.031285	0.0627888
NCU07337	Q7SA26	hypothetical protein	-2.05941	0.531712		1.77183	0.717265		-0.818652	0.798422	1	0.86143	0.822031
NCU09868	Q7S5Y6	hypothetical protein	-2.0569	0.0343234		-2.19529	0.077699		-1.78102	0.0634648	1	0.00629401	0.995906	1
NCU03008	Q9P3Q9	hypothetical protein	-2.0554	0.659282		1.89944	0.775536		-0.974325	0.832035	1	3.00292	0.56472
NCU02231	Q7S4G3	tR (guanine-N(1)-)-methyltransferase	-2.04815	0.34674		2.09682	0.547373		-0.760692	0.717689	1	1.94032	0.467884
NCU16203	#N/A		-2.04777	0.283825		1.66035	0.584575		-0.61996	0.70657	1	-1.75372	0.492484
NCU03696	Q1K7Z9	nitroreductase	-2.04677	0.00596396	0.101628	-0.816588	0.370175	0.503676	1.08432	0.122702	1	5.92672	0.000209481	0.00136591		Enriched GUL-1-GFP
NCU00022	Q7RY83	hypothetical protein	-2.04509	0.188469		2.4935	0.37406		-0.643806	0.64994	1	-1.53845	0.386217
NCU03380	Q873H9	ATP-dependent rR helicase spb-4	-2.03966	0.516406		-3.67824	0.394346		3.66039	0.263416	1	1.71957	0.6412
NCU08805	Q7S8S9	hypothetical protein	-2.02228	0.296587		3.44319	0.284747		0.23544	0.894327	1	-0.334497	0.896827	0.925871
NCU06166	Q7S5C2	alpha-1,2-mannosyltransferase	-2.01822	0.404469		-1.61539	0.611922		-0.0994413	0.965356	1	2.9686	0.299719
NCU17251	V5ILN5	hypothetical protein	-2.00585	0.353156		2.60119	0.460784		-0.196416	0.923528	1	-3.39792	0.153017	0.221106
NCU06395	Q7S9F2	hypothetical protein	-2.00454	0.438075		1.79067	0.653881		-1.06871	0.674999	1	-0.909923	0.754979
NCU04780	Q7S629	VEG136 protein	-2.00205	0.093449		2.41134	0.341961		-0.226576	0.836177	1	-2.50974	0.0695047	0.117507
NCU16806	V5IQ84	hypothetical protein	-1.9911	0.488902		0	1		-0.970877	0.707666	1	-0.546519	0.869374
NCU15199	#N/A		-1.98882	0.725917		-0.996714	0.902399		0.625767	0.913647	1	0	1
NCU08864	Q7S751	hypothetical protein	-1.98828	0.666094		1.8009	0.78839		3.37709	0.471843	1	-0.179381	0.973045
NCU00859	V5IQ09	hypothetical protein, variant	-1.98745	0.722694		0	1		0	1	1	0.807173	0.899157
NCU14172	#N/A		-1.98329	0.0106581	0.131316	-0.128888	0.910747	0.943639	-1.67222	0.017604	1	1.22953	0.20965	0.287242
NCU10245	F5HCG8	hypothetical protein	-1.97997	0.620469		2.51811	0.660286		3.96306	0.319766	1	1.58782	0.723415
NCU09278	Q7S1M9	oxidoreductase	-1.97863	0.344825		2.10173	0.536866		-0.554735	0.803412	1	1.64058	0.53013
NCU05735	Q7SB78	membrane transporter	-1.9747	0.62971		2.05338	0.726443		1.31618	0.739228	1	1.14911	0.802878
NCU08702	Q1K8W5	hypothetical protein	-1.96888	0.120027		1.46206	0.566881		-1.38499	0.233636	1	-0.877975	0.586423
NCU01855	Q7SD13	hypothetical protein	-1.96829	0.168142		3.36693	0.197527		-1.35508	0.269713	1	3.87767	0.0453569
NCU15050	#N/A		-1.96745	0.386164		0.388521	0.912623		-0.836776	0.690117	1	-0.12089	0.965258
NCU08019	Q7SAM2	hypothetical protein	-1.96131	0.565609		-1.87768	0.689654		0	1	1	-0.353844	0.92981
NCU04589	Q7S125	heterokaryon incompatibility protein 6	-1.95677	0.279358		-2.38146	0.349082		-0.024654	0.98873	1	1.82843	0.434979
NCU07840	Q7SAR8	hypothetical protein	-1.95597	0.10546	0.414924	-3.04064	0.0874303		-0.595984	0.579101	1	-0.448142	0.737853	0.799434
NCU02686	Q7SH43	hypothetical protein	-1.92851	0.445234		3.33196	0.397733		3.20978	0.222784	1	1.54917	0.612386
NCU03847	Q7RW29	hypothetical protein	-1.92731	0.521215		2.27248	0.619066		0.675957	0.816605	1	0	1
NCU02155	Q7SER1	hypothetical protein	-1.92349	0.734486		0	1		0	1	1	0.13328	0.983346
NCU07484	Q7SG57	chitise	-1.92349	0.734486		0	1		0	1	1	0.13328	0.983346
NCU00092	Q7RYN6	rR-processing protein efg-1	-1.92348	0.734487		1.46925	0.855843		0.337223	0.951865	1	0.133462	0.983324
NCU09226	Q7S396	WLM domain-containing protein	-1.92346	0.734489		2.25328	0.780408		0	1	1	-0.596488	0.925889
NCU07410	Q7S0U5	hypothetical protein	-1.9234	0.734497		0	1		0	1	1	0	1
NCU02195	Q7S4C6	high affinity methionine permease	-1.9234	0.734498		-0.753729	0.926078		0	1	1	0	1
NCU00973	Q7SGE9	hypothetical protein	-1.9234	0.734498		0	1		-2.53078	0.6583	1	0	1
NCU07138	Q7S6B4	hypothetical protein	-1.9234	0.734498		-0.0417013	0.995897		3.37425	0.552131	1	0	1
NCU09631	Q1K8M3	hypothetical protein	-1.9234	0.734498		0.683571	0.932714		2.07513	0.716417	1	0	1
NCU04282	Q1K787	hypothetical protein	-1.9234	0.734498		0	1		-3.45247	0.543865	1	-5.75958	0.36381
NCU07823	Q7SBE1	scytalone dehydratase	-1.9234	0.734498		-0.760229	0.925443		2.21128	0.698409	1	0	1
NCU00765	O59942	amino acid permease 2	-1.9234	0.734498		-0.208101	0.979538		-1.97334	0.731657	1	0	1
NCU03032	Q7SGY5	betaine lipid synthase	-1.9234	0.734498		0.58532	0.942378		0	1	1	0	1
NCU04657	Q7S3B7	1-aminocyclopropane-1-carboxylate deamise	-1.9234	0.734498		-0.760229	0.925443		0	1	1	0	1
NCU03378	Q7RX14	TOL	-1.9234	0.734498		1.10696	0.891178		0.409217	0.941625	1	0	1
NCU07860	Q7SBU9	alpha-glucosidase	-1.9234	0.734498		1.42951	0.859707		-2.32	0.679903	1	0	1
NCU12125	V5IM89	hypothetical protein	-1.9234	0.734498		1.1283	0.88909		-0.62381	0.911963	1	0	1
NCU03864	Q7RW70	hypothetical protein	-1.9234	0.734498		1.65489	0.837838		3.57669	0.52829	1	0	1
NCU05932	Q7S0P1	hypothetical protein	-1.9234	0.734498		-0.500334	0.95087		0	1	1	-5.72573	0.366734
NCU08902	Q1K632	hypothetical protein	-1.92298	0.734189		0	1		1.09021	0.846172	1	-1.09423	0.864772
NCU14031	#N/A		-1.92183	0.733477		-1.29476	0.872932		0.67252	0.90416	1	0	1
NCU16653	U9W360	hypothetical protein	-1.91984	0.650315		-5.72439	0.337302		-2.43427	0.57997	1	0	1
NCU14126	#N/A		-1.91334	0.55926		2.13699	0.659538		-0.0062799	0.998423	1	1.8075	0.632379
NCU01785	Q1K4Q9	hypothetical protein	-1.91324	0.468517		1.21885	0.750878		0.0573611	0.98026	1	1.84595	0.531713
NCU01022	Q9P749	DUF1253 domain-containing protein	-1.91241	0.592683		2.47795	0.629634		-1.06681	0.753755	1	0.628819	0.876228
NCU14139	#N/A		-1.91227	0.18157		-1.54577	0.423019		-0.4435	0.721675	1	3.08967	0.121666	0.183765
NCU06583	Q7S8N1	serine/threonine protein kise-44	-1.91207	0.592554		0	1		0.479637	0.886552	1	0.860619	0.830822
NCU16391	V5IQQ5	hypothetical protein	-1.9075	0.259549		3.04644	0.299189		-0.133766	0.92909	1	2.53968	0.252303	0.33419
NCU16905	V5IQS6	hypothetical protein	-1.90539	0.734284		-1.29493	0.873502		0	1	1	0	1
NCU16371	V5IQI0	hypothetical protein	-1.90415	0.493048		-0.231103	0.954833		0.787648	0.762981	1	-0.250015	0.937618
NCU14092	#N/A		-1.9026	0.333959		1.2884	0.655175		0.106665	0.942454	1	-1.26954	0.513691
NCU09564	P15710	phosphate-repressible phosphate permease, variant	-1.90035	0.590716		2.99754	0.554999		0	1	1	4.70043	0.233658
NCU07312	Q7SA50	hypothetical protein	-1.89904	0.59012		0.516359	0.919304		3.54343	0.313683	1	1.02272	0.796768
NCU15830	U9W3B7	hypothetical protein	-1.89666	0.206047		-3.88647	0.0176653		-0.612907	0.605077	1	-1.58414	0.268345
NCU00069	Q7RX81	hypothetical protein	-1.89088	0.714676		2.27639	0.75782		2.81144	0.58802	1	-0.361456	0.950734
NCU16993	V5IMB8	hypothetical protein	-1.88706	0.699828		0	1		0.704138	0.88576	1	0	1
NCU07671	Q7S9N0	hypothetical protein	-1.88109	0.709203		0.372144	0.958917		-1.68665	0.733592	1	0.0521881	0.992685
NCU07596	Q7SBG0	hypothetical protein	-1.88045	0.740125		-0.396128	0.961087		0	1	1	0	1
NCU00262	U9W8H4	hypothetical protein	-1.87929	0.580929		2.17075	0.657964		0.523917	0.869111	1	1.09738	0.774739
NCU08505	Q7SC96	DUF866 domain-containing protein	-1.87692	0.379501		2.61622	0.448255		-0.957699	0.635166	1	1.51205	0.569562
NCU10416	A7UWP6	WSC domain-containing protein	-1.8758	0.57975		1.62551	0.73933		2.96852	0.382186	1	1.99954	0.59866
NCU08634	Q7SFI7	hypothetical protein	-1.8732	0.459486		4.2694	0.244021		0.712492	0.764559	1	4.67566	0.0957621
NCU03372	Q1K4Z8	nonspecific lipid-transfer protein	-1.86213	0.739591		0.366104	0.963956		0	1	1	0	1
NCU04437	Q7RZ37	hypothetical protein	-1.8557	0.695958		0.375922	0.955991		-1.62555	0.725549	1	-0.360191	0.946648
NCU00850	Q7SD89	hypothetical protein	-1.85347	0.740599		0	1		0	1	1	0	1
NCU01109	Q7RUH5	hypothetical protein	-1.85005	0.741058		0	1		0	1	1	0	1
NCU16587	V5INR6	hypothetical protein	-1.84939	0.513958		-4.64264	0.246084		1.29811	0.654906	1	-2.21451	0.479841
NCU00079	Q7RX71	hypothetical protein	-1.84548	0.118519		4.61553	0.0635983		0.715396	0.572725	1	1.70874	0.22395	0.302928
NCU06108	Q7S5H9	UPF0135 protein	-1.8372	0.185981		-2.1263	0.263112		-0.392803	0.767704	1	1.20104	0.563799	0.644823
NCU07441	Q7SF13	hypothetical protein	-1.83675	0.742846		1.29375	0.87293		2.99152	0.592847	1	0.856495	0.893016
NCU08026	Q7SAL5	3' exoribonuclease	-1.83619	0.429833		1.96538	0.599098		-1.52981	0.500163	1	1.96056	0.495663
NCU05931	Q7S0P2	hypothetical protein	-1.83399	0.433994		2.50589	0.501125		-1.34935	0.56328	1	3.79082	0.183817
NCU02989	Q7RUY2	hypothetical protein	-1.83341	0.517868		2.07277	0.633147		0.0196561	0.994234	1	0	1
NCU03086	Q7SDS4	HpcH/HpaI aldolase/citrate lyase family protein	-1.83079	0.700557		-0.554376	0.936784		-2.53543	0.606246	1	0	1
NCU07507	V5IPV8	hypothetical protein, variant	-1.82996	0.72841		1.57667	0.836351		-3.03366	0.572768	1	1.61204	0.78809
NCU09685	Q1K6J5	hypothetical protein	-1.82732	0.441622		-2.21418	0.490563		0.0728685	0.973954	1	-1.75368	0.56153
NCU05865	Q7S543	hypothetical protein	-1.82603	0.133989		2.13572	0.394733		-0.0473128	0.965462	1	0.840472	0.584113
NCU05641	Q7S619	hypothetical protein	-1.82393	0.288684		2.36915	0.42413		0.159278	0.922553	1	2.35695	0.292879
NCU14004	#N/A		-1.8229	0.489114		-1.65032	0.688137		0.35874	0.885782	1	0	1
NCU14021	#N/A		-1.82253	0.327425		1.83893	0.558672		-0.316937	0.851053	1	0.0771241	0.975125	0.986124
NCU16204	#N/A		-1.82036	0.400017		0.11458	0.972752		-0.645526	0.732646	1	-1.7537	0.525021
NCU14149	#N/A		-1.81574	0.677378		0.793428	0.899279		1.22049	0.775731	1	1.89466	0.698952
NCU04191	Q9HE87	rai-1	-1.81338	0.327705		2.87731	0.35523		-0.125077	0.940214	1	1.86507	0.432616	0.519377
NCU07270	Q6LJH7	hypothetical protein	-1.80539	0.673018		1.93821	0.752048		-0.177763	0.966034	1	0	1
NCU16968	V5IL66	cytochrome c mitochondrial import factor	-1.80514	0.20636		0.49604	0.784914		0.356025	0.795093	1	6.08279	0.00215354	0.0081943		Enriched GUL-1-GFP
NCU05233	Q7S8H5	p60 domain-containing protein	-1.8041	0.191469		2.61625	0.32932		-0.448533	0.721874	1	-0.853657	0.600536	0.678321
NCU12112	V5ILK9	cell division protein ftsj, variant	-1.79759	0.464822		2.00986	0.599128		-0.706921	0.758405	1	0	1
NCU11128	A7UX96	hypothetical protein	-1.79619	0.380412		2.34632	0.479951		0.579868	0.755616	1	1.51883	0.551778	0.633473
NCU02944	Q7SHG0	hypothetical protein	-1.79026	0.706287		0.782203	0.91004		2.81172	0.562282	1	0.978911	0.857049
NCU14180	#N/A		-1.78582	0.219349		-1.34681	0.482247		0.119592	0.925024	1	0.526337	0.802203	0.849583
NCU03490	Q7RW90	hypothetical protein	-1.7815	0.541877		2.62453	0.552659		1.75031	0.54596	1	3.63824	0.287118
NCU06608	Q7S9Q7	hypothetical protein	-1.77715	0.290038		2.06071	0.484721		0.359574	0.820891	1	-0.832734	0.644043
NCU05780	Q7S5R3	glutathione transferase	-1.76954	0.0577015	0.310633	-1.61291	0.214706		-0.364383	0.69521	1	-1.99428	0.0505831	0.0909862
NCU16971	V5IMT2	hypothetical protein	-1.76589	0.657487		-0.359511	0.950318		-0.603455	0.874297	1	0.637674	0.887286
NCU06658	Q1K6M4	SET domain-containing protein	-1.75978	0.613301		1.61441	0.755718		1.44046	0.677233	1	2.36487	0.558195
NCU06965	Q7SAI4	hypothetical protein	-1.75101	0.754721		-1.29493	0.873502		0	1	1	0	1
NCU09644	Q1K691	UVS-3	-1.74582	0.716922		0.373953	0.957473		2.81167	0.566988	1	1.53736	0.779511
NCU01098	Q7S807	hypothetical protein	-1.74443	0.542983		3.18841	0.442461		-0.275164	0.919335	1	3.65227	0.254194
NCU02458	Q7S448	hypothetical protein	-1.74383	0.276348	0.632919	-3.05742	0.150185	0.247798	-1.10245	0.453713	1	-2.80837	0.106086	0.164787
NCU04874	Q7S371	altertive oxidase	-1.73189	0.645608		2.26092	0.676538		2.81316	0.457971	1	3.40231	0.420255
NCU06513	Q7S827	hypothetical protein	-1.72366	0.352818		3.54483	0.259257		0.330793	0.848319	1	3.06579	0.198768
NCU02640	Q7SDA6	hypothetical protein	-1.7231	0.246042		2.24009	0.426077		-0.924837	0.500287	1	0.486907	0.823666	0.866556
NCU16019	Q36580	group I intron endonuclease	-1.72137	0.305799	0.665389	-2.7432	0.242436		0.338006	0.829087	1	-5.09016	0.00889602	0.0242381
NCU16803	V5IML4	hypothetical protein	-1.72135	0.520427		1.43937	0.712393		-1.3749	0.577158	1	-2.40381	0.392066
NCU05563	Q7S700	hypothetical protein	-1.72124	0.761157		1.97922	0.806584		0	1	1	0.634394	0.920703
NCU06614	Q7S9Q1	hypothetical protein	-1.72124	0.761157		1.59561	0.843579		0	1	1	0.634388	0.920704
NCU04099	Q1K6V5	alpha-methylacyl-CoA racemase	-1.72121	0.76116		0.585233	0.942386		0	1	1	-0.185865	0.976815
NCU09762	Q7S018	hypothetical protein	-1.72114	0.76117		-0.753729	0.926078		0	1	1	0	1
NCU16659	U9WGQ0	hypothetical protein	-1.72114	0.761171		1.81823	0.822064		3.0133	0.595915	1	0	1
NCU05083	Q7RWK1	hypothetical protein	-1.72114	0.761171		1.08528	0.893299		2.48956	0.66211	1	0	1
NCU17049	V5IM32	hypothetical protein	-1.7202	0.537592		3.34079	0.408713		0.835247	0.747561	1	2.46051	0.431238
NCU02497	Q7SG67	hypothetical protein	-1.71393	0.60435		0.872958	0.861584		0.63697	0.850151	1	2.24349	0.56354
NCU08953	Q1K6L2	hypothetical protein	-1.71309	0.536082		0.772873	0.848479		2.08222	0.462952	1	-1.90782	0.494353
NCU09913	Q7S143	major royal jelly protein	-1.70615	0.763163		0	1		0	1	1	1.11549	0.860865
NCU09093	Q7SFQ7	DEAD box R helicase-PL10B	-1.70615	0.763164		-0.134003	0.98682		0	1	1	1.08871	0.864181
NCU07905	Q7SA12	hypothetical protein	-1.70614	0.763166		0.683456	0.932726		3.94773	0.486013	1	0.615631	0.923046
NCU02485	Q7SG79	hypothetical protein	-1.70613	0.763167		1.46924	0.855844		3.78783	0.504001	1	0.37204	0.953489
NCU05493	Q7S6U6	hypothetical protein	-1.70612	0.763167		-0.760335	0.925433		0	1	1	0.149297	0.981344
NCU08497	V5INQ6	hypothetical protein	-1.7061	0.763171		-0.556718	0.945346		2.07513	0.716417	1	-0.596491	0.925888
NCU00857	Q7SFH4	hypothetical protein	-1.7061	0.763171		0.211321	0.979197		0	1	1	-0.596517	0.925885
NCU00375	Q7RYT4	hypothetical protein	-1.70604	0.763179		0	1		0	1	1	0	1
NCU02607	Q7SG13	hypothetical protein	-1.70604	0.763179		0	1		0	1	1	0	1
NCU05105	Q7RYF9	glucan endo-1,3-beta-glucosidase	-1.70604	0.763179		0	1		0	1	1	0	1
NCU07033	V5INX8	hypothetical protein	-1.70604	0.763179		0	1		0	1	1	0	1
NCU09279	Q7S1M8	laccase	-1.70604	0.763179		0	1		0	1	1	0	1
NCU11416	A7UXF2	hypothetical protein	-1.70604	0.763179		0	1		0	1	1	0	1
NCU14017	#N/A		-1.70604	0.763179		0	1		0	1	1	0	1
NCU14171	#N/A		-1.70604	0.763179		-0.396128	0.961087		-3.52446	0.535362	1	0	1
NCU09506	Q7S1G5	hypothetical protein	-1.70604	0.763179		-0.760229	0.925443		0	1	1	0	1
NCU03400	F5HD67	hypothetical protein	-1.70603	0.763179		0.366104	0.963956		-5.5291	0.328496	1	0	1
NCU08636	Q7SFI5	hypothetical protein	-1.70544	0.760877		0.943578	0.907182		0	1	1	0	1
NCU04353	Q7RW67	hypothetical protein	-1.70453	0.421105		3.08195	0.368412		-1.58088	0.442845	1	2.9991	0.251879
NCU00821	Q7SEB3	sugar transporter	-1.70426	0.156848		4.39462	0.0775442		-0.0140751	0.989467	1	3.86911	0.0352789	0.0688344
NCU08068	Q7SGL5	mitotic spindle biogenesis protein Spc19	-1.70382	0.2554		3.11482	0.254304		0.0774875	0.955297	1	2.6642	0.193599
NCU16729	V5IM54	hypothetical protein	-1.70348	0.534092		1.31701	0.741574		-1.72776	0.486975	1	1.91005	0.534824
NCU07340	Q7SA23	exoglucase 1	-1.69969	0.635519		2.68373	0.603462		1.33841	0.69477	1	0	1
NCU02376	Q7S4V1	metallo-beta-lactamase domain-containing protein	-1.69622	0.176328	0.532258	0.744493	0.669319		0.103777	0.932155	1	4.89714	0.0105348	0.0276399		Enriched GUL-1-GFP
NCU05992	Q7S2G3	hypothetical protein	-1.6911	0.53161		1.56645	0.69091		-0.263097	0.916428	1	-0.750872	0.788161
NCU09384	Q7SCW0	hypothetical protein	-1.68268	0.58142		2.16571	0.636718		-1.36147	0.652475	1	3.10827	0.38148
NCU08315	Q7SA73	monooxygese	-1.67708	0.528915		3.0563	0.429655		5.32117	0.0418519	1	1.90116	0.525239
NCU07815	Q7SBE9	hypothetical protein	-1.67701	0.250892		2.28193	0.408966		0.145749	0.912448	1	1.57091	0.453001	0.538719
NCU09775	Q7S187	alpha-N-arabinofuranosidase	-1.67519	0.376925		1.20099	0.695258		-0.054246	0.973155	1	0.877461	0.709099
NCU04835	V5IKM8	hypothetical protein	-1.6705	0.294203		2.9034	0.313355		-0.384776	0.789297	1	1.76709	0.419433	0.506568
NCU07424	Q7S1F0	hypothetical protein	-1.66633	0.271946		2.71947	0.330186		0.735928	0.609615	1	-0.879515	0.601555
NCU05764	Q7S4Q9	hypothetical protein	-1.66061	0.723734		0.786456	0.907209		-2.77441	0.559618	1	1.81475	0.731178
NCU02545	Q7SHR9	hypothetical protein	-1.65907	0.266235		-2.01183	0.328268		0.714688	0.626562	1	3.26892	0.11926
NCU07288	V5INV3	hypothetical protein	-1.65884	0.427232		2.08657	0.542413		-0.269255	0.890388	1	0.662101	0.8038	0.850803
NCU03932	Q7RZC4	hypothetical protein	-1.6561	0.169522	0.522701	-1.2887	0.435144	0.56794	0.425982	0.707568	1	0.811158	0.58047	0.65916
NCU04571	Q1K665	hypothetical protein	-1.65521	0.736156		1.16825	0.868245		1.1985	0.803787	1	0.635496	0.90869
NCU01296	V5ILM9	hypothetical protein	-1.65461	0.00832703	0.116523	0.79794	0.384442	0.518523	-1.25183	0.0346475	1	0.775601	0.274492	0.357881
NCU05699	Q7SBN9	hypothetical protein	-1.65427	0.735698		0.867551	0.901787		4.13974	0.398514	1	1.40309	0.799137
NCU08371	Q7SGP4	hypothetical protein	-1.65299	0.22207		1.44253	0.580828		-0.505377	0.689117	1	2.40091	0.214537
NCU16228	#N/A		-1.65124	0.758585		-5.66916	0.452716		-0.615797	0.909443	1	0	1
NCU03344	Q1K525	hypothetical protein	-1.6503	0.621804		1.74643	0.718289		2.3836	0.454657	1	0.413115	0.913509
NCU08969	Q7S7E5	hypothetical protein	-1.64847	0.770855		0	1		3.85381	0.496536	1	-0.596502	0.925887
NCU15661	#N/A		-1.64769	0.716919		-0.822795	0.900337		-0.620096	0.891037	1	-0.682114	0.895364
NCU14069	#N/A		-1.64566	0.343678		0.534998	0.860483		-1.17544	0.45321	1	0	1	1
NCU04759	P87102	nuclear transport factor 2	-1.63765	0.105409	0.414924	5.03806	0.0362586	0.079427	-0.647268	0.479191	1	1.36952	0.29799	0.383378
NCU15197	#N/A		-1.63676	0.403769		0.919551	0.770855		0.0884514	0.959862	1	-1.75372	0.505238
NCU17318	#N/A		-1.63632	0.0496202	0.28904	-0.958957	0.415896	0.54907	-0.474047	0.56952	1	-0.580108	0.533594	0.61642
NCU05951	Q7S2C7	hypothetical protein	-1.62519	0.490634		4.62504	0.17852		2.37631	0.323196	1	5.32252	0.042248
NCU09437	Q7S1X8	hypothetical protein	-1.62022	0.329479		-2.21471	0.319699		3.70036	0.0622353	1	3.24733	0.148071	0.215261
NCU02246	Q7S5B7	hypothetical protein	-1.61518	0.388413		3.88057	0.204426		4.19537	0.038946	1	4.67583	0.0427123
NCU05351	F5HCU3	hypothetical protein	-1.61172	0.517855		0	1		-0.274033	0.898879	1	1.08706	0.700196
NCU06853	Q1K8K2	hypothetical protein	-1.61054	0.168512		-2.3452	0.134251		-0.220583	0.833239	1	-0.827994	0.509321	0.594484
NCU16027	Q12635	ATPase subunit 9	-1.60785	0.0300476	0.22442	-2.41215	0.0138579	0.0461662	-1.54496	0.0213882	1	-1.25464	0.122623	0.184966
NCU07080	Q7S6E4	hypothetical protein	-1.60686	0.550827		2.49895	0.552051		0	1	1	3.17528	0.327607
NCU06330	Q7SAA1	hypothetical protein	-1.60554	0.111247		-0.570209	0.668641		0.356086	0.692799	1	0.52418	0.702319	0.768186
NCU06880	Q7S3H3	AhpC/TSA family protein	-1.60318	0.166046	0.518252	4.89926	0.0560133	0.110106	2.23641	0.0655745	1	-1.82412	0.14583	0.212832
NCU02594	Q7SG26	hypothetical protein	-1.60051	0.712703		1.47727	0.813161		-0.344195	0.935242	1	0.914957	0.852103
NCU07434	Q7SF19	short-chain dehydrogese/reductase SDR	-1.59293	0.374095		2.76024	0.375357		1.34201	0.434521	1	2.32595	0.325945
NCU14033	#N/A		-1.59228	0.739013		0.567859	0.934803		0.62577	0.89961	1	0	1
NCU08328	Q7SA61	hypothetical protein	-1.59009	0.253409		-1.25001	0.529369		0.451007	0.725192	1	2.89836	0.142582
NCU14005	#N/A		-1.58527	0.51405		1.16393	0.744519		-0.306258	0.885197	1	2.13202	0.434436
NCU06607	Q7S9Q8	hypothetical protein	-1.57961	0.406361	0.741253	7.41341	0.022237	0.0581199	0.60849	0.746883	1	8.66719	0.000425725	0.00236706		Enriched GUL-1-GFP
NCU11088	V5INN2	MGMT family protein	-1.57912	0.503498		1.76462	0.637874		-1.11192	0.617884	1	0	1
NCU06519	Q7S874	multidrug transporter	-1.57745	0.535046		2.77743	0.4819		2.24914	0.368325	1	3.18763	0.294425
NCU01014	Q1K8D4	acyltransferase	-1.57661	0.780483		-0.0275386	0.99729		0	1	1	-1.0943	0.864949
NCU11210	A7UVZ6	hypothetical protein	-1.57656	0.78049		0	1		0	1	1	0	1
NCU14010	#N/A		-1.57656	0.78049		0	1		0	1	1	0	1
NCU15162	#N/A		-1.57656	0.78049		0	1		0	1	1	0	1
NCU16473	V5IQN8	hypothetical protein	-1.57656	0.78049		0	1		0	1	1	0	1
NCU07944	Q7S9X4	deoxyribose-phosphate aldolase	-1.57656	0.78049		-1.29493	0.873502		0	1	1	0	1
NCU15169	#N/A		-1.57656	0.78049		0	1		0.247542	0.965097	1	0	1
NCU15033	#N/A		-1.57656	0.78049		0	1		1.52778	0.788563	1	0	1
NCU14109	#N/A		-1.57656	0.78049		0.593505	0.941572		0	1	1	0	1
NCU06313	Q7SAB8	hypothetical protein	-1.57656	0.78049		-0.996714	0.902399		0.0486982	0.993038	1	0	1
NCU15393	#N/A		-1.57656	0.78049		-1.88858	0.816723		-1.36045	0.812443	1	0	1
NCU00727	Q7SEF1	hypothetical protein	-1.57624	0.703747		1.99588	0.737944		0.914579	0.819947	1	0.557443	0.905468
NCU06119	Q7S5G9	SET-5	-1.57586	0.512787		0.818146	0.81777		1.66309	0.446788	1	2.86155	0.288101
NCU01321	Q1K7V0	high-affinity nickel transporter	-1.57473	0.492787		2.22229	0.543009		-0.546251	0.808994	1	-0.74584	0.769443
NCU10603	V5IPY8	hypothetical protein	-1.57325	0.512445		3.11503	0.374795		-2.4838	0.263686	1	3.06829	0.253159
NCU17026	V5INE6	hypothetical protein	-1.57283	0.67653		-0.0074634	0.998932		1.49497	0.705578	1	2.20388	0.61033
NCU09652	Q7S271	beta-xylosidase	-1.56916	0.317273		-2.66033	0.238079		2.98285	0.118286	1	2.27544	0.286086
NCU01013	Q7S819	delta-aminolevulinic acid dehydratase	-1.5689	0.511879		4.46899	0.200478		3.30201	0.16643	1	5.38707	0.043125
NCU09798	Q7S5S3	aryl-alcohol dehydrogese	-1.56848	0.489767		3.2264	0.3779		0	1	1	3.93193	0.160495
NCU03133	Q7SDV7	hypothetical protein	-1.56754	0.567669		1.378	0.744773		-1.77297	0.505891	1	0	1
NCU04180	Q1K7E7	mitochondrial folate carrier protein Flx1	-1.56659	0.507114		3.0452	0.414189		-0.866228	0.708904	1	2.08237	0.468993
NCU15222	#N/A		-1.56618	0.76852		-6.532	0.383139		-1.33514	0.803006	1	-1.75344	0.773167
NCU00572	Q7SF78	thaumatin family protein	-1.56312	0.516574		3.10022	0.407299		0.575454	0.799644	1	2.915	0.310638
NCU02795	Q7SEL7	histone deacetylase phd1	-1.56248	0.22338		4.7602	0.0649385		1.38237	0.263343	1	1.79175	0.202389	0.27916
NCU00648	Q7SI04	choline transporter	-1.55348	0.696011		1.69996	0.766837		3.87705	0.330356	1	2.65944	0.55217
NCU11331	A7UWU1	hypothetical protein	-1.55206	0.416487		0.474853	0.868597		-0.91388	0.522348	1	2.97448	0.160147
NCU03934	Q7RZC3	hypothetical protein	-1.54573	0.322361		3.75026	0.182617		0.0182174	0.989633	1	2.16134	0.310107	0.395509
NCU07455	Q7SF00	hypothetical protein	-1.54388	0.736882		0.692585	0.917515		0	1	1	0.937602	0.858168
NCU08302	V5IMG0	hypothetical protein, variant	-1.54119	0.649183		2.75369	0.587342		1.33592	0.692927	1	2.63351	0.50513
NCU09213	Q1K6D1	hypothetical protein	-1.5397	0.597874		-3.64905	0.336842		0.181348	0.949705	1	3.04016	0.354041
NCU06806	F5HD25	hypothetical protein	-1.5373	0.549059		1.77931	0.652901		0.599616	0.808066	1	0.429077	0.889853
NCU08414	Q7SC40	hypothetical protein	-1.53628	0.575904		2.86102	0.497096		-0.152977	0.954569	1	1.6252	0.619588
NCU04902	Q7S1D3	sodium-hydrogen antiporter	-1.53185	0.732259		-0.0709219	0.991249		-1.48181	0.737146	1	1.76011	0.727095
NCU06957	Q7SAJ2	hypothetical protein	-1.52207	0.331227		3.94956	0.167516		-0.211736	0.88667	1	-0.157189	0.926169	0.949501
NCU06811	F5H9P3	hypothetical protein	-1.51934	0.51841		3.05629	0.412458		1.48442	0.519022	1	1.84152	0.522543
NCU09909	Q7S147	urea active transporter	-1.51738	0.788454		0.126439	0.987555		0	1	1	1.87747	0.767684
NCU05001	V5IL49	ent-kaurene oxidase	-1.51731	0.788463		0	1		0	1	1	-0.362703	0.954822
NCU05892	Q7S516	hypothetical protein	-1.51724	0.788473		0	1		0	1	1	0	1
NCU06784	Q7SCH7	hypothetical protein	-1.51724	0.788473		0	1		0	1	1	0	1
NCU08849	Q1K735	hypothetical protein	-1.51724	0.788473		0	1		0	1	1	0	1
NCU05766	Q7S4Q7	hypothetical protein	-1.51724	0.788473		-0.396128	0.961087		-3.7759	0.506212	1	0	1
NCU02188	Q7S4D2	sugar transporter	-1.51724	0.788473		0.107439	0.989426		2.45088	0.667111	1	0	1
NCU09126	Q7S2M2	hypothetical protein	-1.51724	0.788473		-0.0417013	0.995897		-3.26272	0.566595	1	0	1
NCU07786	Q7RVR6	hypothetical protein	-1.51724	0.788473		0.775551	0.923675		0	1	1	0	1
NCU09306	A7UXI2	hypothetical protein	-1.51724	0.788473		-0.396128	0.961087		0	1	1	0	1
NCU02158	V5INZ7	hypothetical protein	-1.51724	0.788473		2.09802	0.795209		4.0096	0.479147	1	0	1
NCU01416	Q1K6T9	hypothetical protein	-1.51724	0.788473		-0.396128	0.961087		1.27831	0.820201	1	0	1
NCU08097	Q7SGI7	exo-beta-1,3-glucase	-1.51724	0.788473		1.53363	0.84959		3.19298	0.57392	1	0	1
NCU10091	V5IL98	hypothetical protein	-1.51723	0.788473		0	1		-0.91379	0.869011	1	0	1
NCU01403	Q7S732	GPI anchored protein	-1.51398	0.423799		3.22502	0.317334		2.14095	0.258261	1	2.91459	0.234973
NCU12151	V5IMC9	hypothetical protein	-1.5043	0.584678		2.01888	0.633073		-0.106388	0.9689	1	2.66283	0.414873
NCU05031	Q7RX57	hypothetical protein	-1.50007	0.720491		-1.28009	0.833847		3.43794	0.414374	1	0.286075	0.952071
NCU05506	Q7S6T3	hypothetical protein	-1.49658	0.697834		1.09302	0.844579		2.2481	0.562275	1	2.24223	0.605771
NCU02522	Q7SHU1	hypothetical protein	-1.48212	0.368778		1.54421	0.592088		1.11318	0.467995	1	2.18783	0.312338
NCU06523	Q7S8A4	alpha-glucosidase	-1.48145	0.793304		-0.760308	0.925436		0	1	1	-0.596465	0.925891
NCU05583	Q7S6Y0	hypothetical protein	-1.47905	0.674723		0.147031	0.97717		0.300455	0.930349	1	1.71533	0.666649
NCU05783	Q7S5R0	oligosaccharide translocation protein RFT1	-1.47611	0.673985		1.92096	0.705536		3.44564	0.328533	1	2.66391	0.500505
NCU06214	Q7SBA9	hypothetical protein	-1.47538	0.29159		1.60974	0.555371		-0.328436	0.801688	1	-1.23891	0.430002	0.516723
NCU08165	Q7S4I5	hypothetical protein	-1.474	0.501918		3.52766	0.312561		0.302263	0.881011	1	1.97238	0.463118	0.549384
NCU09635	Q7S0U1	hypothetical protein	-1.47192	0.766698		0.216625	0.975785		5.23909	0.291048	1	0	1
NCU05649	Q7S611	RTA1 domain-containing protein	-1.4705	0.576956		3.0248	0.461786		1.26472	0.623408	1	3.27535	0.301702
NCU10142	A7UX71	hypothetical protein	-1.47031	0.529014		3.44983	0.349345		-0.45939	0.836132	1	2.89018	0.307483
NCU14169	#N/A		-1.46723	0.793332		0	1		-0.449028	0.935409	1	0	1
NCU16004	P0CY45	DH dehydrogese subunit 6	-1.46606	0.208277	0.565321	-1.4995	0.356321	0.491792	-1.49404	0.169317	1	-3.23383	0.0118864	0.030367
NCU15658	#N/A		-1.46113	0.577242		2.41503	0.548851		-2.39577	0.405079	1	0.773945	0.803409
NCU00084	Q7RYP3	hypothetical protein	-1.4611	0.76206		0.567731	0.934815		3.81063	0.431168	1	2.31719	0.669556
NCU04082	Q7RWM7	hypothetical protein	-1.46063	0.310207		-1.93088	0.324477		-0.960182	0.523657	1	2.00235	0.323791
NCU05693	Q7SBP5	interferon-induced GTP-binding protein Mx2	-1.45363	0.0756664	0.355264	4.86864	0.0313566		-0.422305	0.594538	1	-0.158002	0.856405	0.893652
NCU02027	Q9HFJ5	acyl-protein thioesterase 1	-1.44806	0.304387		3.51217	0.201578		-2.2903	0.104636	1	-3.01652	0.0555296	0.0980095
NCU15630	#N/A		-1.44668	0.130458	0.462829	-1.54553	0.23834	0.363233	-0.661999	0.472498	1	-2.64767	0.00960126	0.0257079
NCU16218	#N/A		-1.44659	0.64712		1.03358	0.822665		-1.73242	0.565386	1	-4.15332	0.266763
NCU14048	#N/A		-1.44603	0.646454		0.846946	0.854077		-1.97004	0.509914	1	-0.55864	0.878741
NCU01337	Q1K7T9	dihydrofolate synthetase Fol3	-1.44588	0.281047		-2.01695	0.306895		-1.95158	0.143406	1	2.92373	0.135065
NCU03716	Q7S7Y3	hypothetical protein	-1.4447	0.149713	0.492929	-0.400001	0.777675		-0.465063	0.603178	1	-0.48554	0.644558	0.717421
NCU07077	V5IKK7	hypothetical protein	-1.44432	0.467052		2.61479	0.416184		-0.645354	0.718615	1	0	1
NCU14076	#N/A		-1.44393	0.755285		0	1		-0.447166	0.920844	1	0	1
NCU00570	Q7SF80	D-directed R polymerase III polypeptide	-1.44179	0.40032		3.10079	0.302401		-0.627768	0.690497	1	1.56185	0.497041	0.582164
NCU01891	Q7SHB5	hypothetical protein	-1.43915	0.571766		2.11958	0.59277		0.178315	0.941424	1	0.384456	0.901589
NCU09488	Q7SBZ5	SDA1 domain-containing protein	-1.43826	0.709489		1.99202	0.727398		2.80143	0.483731	1	2.49165	0.576546
NCU08456	V5IR67	hypothetical protein	-1.43775	0.28421		4.01022	0.128621		-0.243517	0.844804	1	3.95863	0.0436283	0.0815172
NCU03254	Q7SEH3	hypothetical protein	-1.43481	0.197065		-1.3841	0.358803		-0.723913	0.458047	1	3.14048	0.0737817
NCU17107	V5IM46	hypothetical protein	-1.4329	0.66411		1.79151	0.708783		0.345515	0.912345	1	-0.352242	0.926318
NCU01463	Q1K5C6	hypothetical protein	-1.43256	0.751022		1.30114	0.841308		0.814528	0.853099	1	0	1
NCU07419	Q7S1F4	F-box domain-containing protein	-1.43188	0.153612		2.85569	0.226617		-0.70617	0.415537	1	3.46854	0.0443263	0.0825257
NCU01182	Q1K854	hypothetical protein	-1.43035	0.554174		5.21932	0.171775		-0.267134	0.90875	1	4.20536	0.152039	0.219803
NCU16980	V5IP29	hypothetical protein	-1.42839	0.749485		1.60597	0.80299		-5.24188	0.241897	1	-0.58602	0.908756
NCU04068	Q7RZF0	60S ribosomal protein L6	-1.42538	0.0747441	0.35451	-2.72663	0.00732736	0.0348689	-1.15204	0.118412	1	5.83685	0.000377394	0.00215686		Enriched GUL-1-GFP
NCU00617	Q7SI34	phosducin family protein	-1.42276	0.222489	0.58298	-0.21706	0.893571	0.930487	-0.564556	0.5975	1	0.368132	0.790944	0.841542
NCU02100	Q7SDN3	LMBR1 domain-containing protein 1	-1.41924	0.186523	0.542122	3.60047	0.13984		-0.511952	0.595226	1	-1.28319	0.265222	0.348116
NCU02213	Q7S3X6	hypothetical protein	-1.41515	0.276969		3.91012	0.122283		0.388891	0.734027	1	4.07342	0.029319
NCU07577	Q7S115	zinc finger containing protein	-1.40946	0.431937		3.63114	0.239568		0.0181249	0.991296	1	2.51414	0.284278	0.368858
NCU16370	V5IP97	hypothetical protein	-1.4051	0.741491		1.27946	0.835032		-0.382571	0.926487	1	0.0543442	0.991055
NCU08862	Q1K729	hypothetical protein	-1.4017	0.804109		0.763181	0.92489		0	1	1	2.27855	0.71983
NCU08648	Q7S8Q5	nuclease PA3	-1.40167	0.804114		0.160077	0.984243		2.53075	0.656799	1	1.21829	0.848157
NCU09575	Q7S4M5	sterol esterase	-1.40162	0.80412		-0.996799	0.90239		0	1	1	-0.362668	0.954826
NCU09639	Q7S0T7	hypothetical protein	-1.40155	0.80413		0	1		0	1	1	0	1
NCU08387	Q7SD64	hypothetical protein	-1.40155	0.80413		-0.996714	0.902399		0	1	1	0	1
NCU06088	Q7S484	hypothetical protein	-1.40155	0.80413		1.02078	0.899615		-3.45247	0.543865	1	0	1
NCU07450	Q7SF05	hypothetical protein	-1.40155	0.80413		-0.0417013	0.995897		1.49132	0.795149	1	0	1
NCU15415	#N/A		-1.39963	0.624178		-1.24506	0.775424		2.81114	0.307783	1	-1.06268	0.758659
NCU08706	Q1K8W2	AAA family ATPase	-1.39868	0.578911		2.25489	0.564909		1.0211	0.680721	1	2.13478	0.479999
NCU15132	#N/A		-1.3978	0.728815		0	1		1.86324	0.641735	1	-0.464438	0.921101
NCU05020	Q7RX04	hypothetical protein	-1.39115	0.737041		2.45759	0.680694		-0.297054	0.941836	1	2.06877	0.658055
NCU03245	Q7SCM6	hypothetical protein	-1.39002	0.643604		1.79774	0.692018		2.44509	0.410976	1	0.992502	0.779356
NCU16015	P0CY43	laglidadg endonuclease	-1.38748	0.20024	0.560406	-0.0203442	0.989203	0.994467	-0.712671	0.488707	1	-2.79159	0.0186672	0.0427424
NCU07896	Q7S880	hypothetical protein	-1.38702	0.735787		1.88168	0.751034		-2.69548	0.506462	1	0.134889	0.977007
NCU04592	Q1K625	3-oxoacyl-(acyl-carrier-protein) reductase	-1.38393	0.266914		-2.24531	0.181696		-1.98957	0.138403	1	-0.425112	0.796505	0.845264
NCU03733	Q1K7X5	hypothetical protein	-1.38335	0.452842		1.19864	0.705098		0.796085	0.644625	1	0	1
NCU09256	Q7SF54	hypothetical protein	-1.38022	0.654031		1.75088	0.696861		1.75772	0.55671	1	2.97849	0.391447
NCU16377	V5IQX0	oligoribonuclease	-1.37989	0.576568		1.41342	0.698476		-0.446156	0.83556	1	1.30994	0.641432
NCU01808	P00048	cytochrome c	-1.3783	0.280831	0.637635	-3.75539	0.0217425	0.0576234	0.586064	0.618999	1	-1.87916	0.147574	0.214809
NCU09381	Q7SCW3	RWD domain-containing protein	-1.37784	0.178627		3.58178	0.135066		0.170711	0.855058	1	3.66512	0.0370293	0.0714199
NCU09107	Q7S158	hypothetical protein	-1.37719	0.521035		2.83343	0.419967		-1.05778	0.602414	1	1.38045	0.611154	0.687835
NCU05555	Q7S708	hypothetical protein	-1.37564	0.404436		3.44615	0.239027		5.64012	0.00305595	0.707943	4.55056	0.0383568
NCU16018	P08774	DH dehydrogese subunit 1	-1.37231	0.124199	0.453253	-0.779695	0.528772	0.654992	-1.25965	0.145867	1	-2.54573	0.00944691	0.0253656
NCU04430	Q7RZ44	leupeptin-ictivating enzyme 1	-1.36618	0.316586		3.59758	0.163101		1.64007	0.174278	1	4.1083	0.0313994
NCU11118	A7UWU8	hypothetical protein	-1.36617	0.462574	0.778229	2.87973	0.371165		-0.405511	0.818366	1	0.653688	0.794293	0.843854
NCU05183	V5IQS1	hypothetical protein	-1.36526	0.651538		1.97541	0.654501		1.5228	0.595382	1	2.96856	0.38438
NCU02170	Q7SEP7	hypothetical protein	-1.36377	0.651295		3.67781	0.402776		0	1	1	3.98291	0.241556
NCU02061	Q7SDD7	hypothetical protein	-1.36362	0.602645		1.61193	0.692565		0.120624	0.96325	1	3.22106	0.304038
NCU09703	Q7S2S3	acetolactate decarboxylase	-1.36239	0.713248		0.942654	0.863735		-0.362234	0.922087	1	-0.575266	0.89509
NCU09015	Q7S0R8	hypothetical protein	-1.35434	0.726479		1.3169	0.814276		2.21357	0.555619	1	0.625226	0.887018
NCU08050	Q7SGN3	hypothetical protein	-1.35052	0.811071		-0.439565	0.956827		0	1	1	2.82251	0.656663
NCU07789	Q7S0K6	hypothetical protein	-1.35049	0.811075		-0.134025	0.986818		0	1	1	1.72069	0.78664
NCU09092	Q7SFQ8	hypothetical protein	-1.35048	0.811076		0.107291	0.98944		0	1	1	1.55607	0.806676
NCU07343	V5IMH8	major facilitator family transporter, variant	-1.35047	0.811078		2.19454	0.785999		-3.77589	0.506212	1	1.12774	0.859349
NCU05256	Q7S887	hypothetical protein	-1.35046	0.811079		0.861886	0.915197		0	1	1	0.902359	0.88731
NCU07180	Q7RZ17	hypothetical protein	-1.35046	0.811079		2.10852	0.794206		3.19298	0.57392	1	0.892367	0.888553
NCU09330	Q7SD55	hypothetical protein	-1.35045	0.811081		1.81956	0.821936		0	1	1	0.394544	0.950675
NCU05101	Q1K5N3	hypothetical protein	-1.35044	0.811082		0.593407	0.941582		0	1	1	0.133346	0.983338
NCU03583	Q7S726	hypothetical protein	-1.35044	0.811083		1.35467	0.866992		3.86451	0.495331	1	0.133424	0.983328
NCU16452	V5IRR2	hypothetical protein	-1.35036	0.811094		-0.996714	0.902399		2.79212	0.623507	1	0	1
NCU03000	Q7RV41	glycosylhydrolase family 61-8 protein	-1.35036	0.811094		-0.0417013	0.995897		0	1	1	0	1
NCU16588	V5INJ5	hypothetical protein	-1.35035	0.811094		0.943578	0.907182		3.48858	0.5386	1	0	1
NCU14038	#N/A		-1.35035	0.811094		-0.996714	0.902399		2.93956	0.605052	1	0	1
NCU08282	Q7S8B1	hypothetical protein	-1.34963	0.0936181	0.394447	-1.2258	0.248469	0.37641	-0.812989	0.256413	1	3.92895	0.0175046	0.0406916		Enriched GUL-1-GFP
NCU16859	V5IML1	hypothetical protein	-1.34494	0.695458		-0.164108	0.974528		0.83639	0.813436	1	1.582	0.690797
NCU01950	Q7SDY6	pre-mR-splicing factor slu-7	-1.34052	0.169956		4.11054	0.074648		0.44694	0.575535	1	1.15711	0.3878	0.475469
NCU05401	V5IQY9	hypothetical protein	-1.33681	0.721973		-0.00503164	0.999267		0.997236	0.781422	1	0.938694	0.825827
NCU06011	Q7S2E6	multidrug resistance protein 3	-1.33653	0.804693		1.67516	0.82874		4.599	0.395792	1	0.37239	0.951383
NCU16430	V5IRB9	hypothetical protein	-1.33642	0.785317		0.566683	0.936703		2.81159	0.574025	1	0	1
NCU08369	Q7SGP6	rhodopsin family protein	-1.3339	0.53402		3.5511	0.308072		0.354681	0.860823	1	3.39185	0.202811	0.279643
NCU08433	Q1K8P2	hypothetical protein	-1.33379	0.351635		3.80656	0.147721		-1.21586	0.312931	1	3.60279	0.0654711	0.111841
NCU07897	Q7S879	hypothetical protein	-1.33039	0.418456		-1.44978	0.519183		4.021	0.0393825	1	-0.582005	0.758675
NCU15335	#N/A		-1.32938	0.722649		-1.06829	0.845734		-2.22895	0.551411	1	0	1
NCU01464	Q1K5C5	zinc carboxypeptidase	-1.32808	0.205189	0.56241	-0.368469	0.802641	0.873152	-0.161807	0.863616	1	3.25819	0.0696248	0.117675
NCU05184	V5IP44	hypothetical protein	-1.3274	0.768518		0.608906	0.925458		-2.19004	0.635598	1	2.15491	0.67175
NCU06018	Q7S3W4	hypothetical protein	-1.32728	0.662278		2.27936	0.619943		2.16808	0.479105	1	2.17008	0.543244
NCU04148	Q1K7L0	hypothetical protein	-1.32607	0.527012		1.41957	0.679244		-1.14409	0.562413	1	2.07465	0.428376
NCU16442	V5IR22	hypothetical protein	-1.32379	0.566266		2.10146	0.570706		0.274709	0.905464	1	0.473042	0.870405
NCU15633	#N/A		-1.32042	0.0734036	0.352393	-1.36211	0.174736	0.280874	-0.426098	0.542329	1	-2.40177	0.00214226	0.00816467
NCU01958	P19392	mating-type protein A-1	-1.32021	0.797793		-0.0357372	0.996156		1.11362	0.826993	1	0	1
NCU09006	U9W3H6	NEDD8-activating enzyme E1 regulatory subunit, variant	-1.31865	0.391298		3.63687	0.201685		1.09747	0.466896	1	3.93352	0.0655362	0.111919
NCU02095	Q7SDB5	hypothetical protein	-1.31839	0.504716		2.41501	0.471259		0.353846	0.853835	1	-0.104784	0.962409	0.977981
NCU16681	U9W3F6	hypothetical protein	-1.31639	0.437146		2.7315	0.356712		1.19555	0.491197	1	2.53664	0.257582
NCU06525	Q7S8A2	hypothetical protein	-1.31349	0.398008	0.73289	2.07368	0.458		-1.19186	0.374288	1	0	1	1
NCU08692	Q1K8E5	coxI translation protein CYA5	-1.30637	0.566179		2.44906	0.497598		1.59175	0.476726	1	3.34584	0.225608
NCU01070	Q1K8A0	hypothetical protein	-1.29512	0.409249		3.66134	0.187736		-0.192852	0.887435	1	4.1326	0.0466466	0.0854867
NCU09839	Q7S069	hypothetical protein	-1.29409	0.712265		1.73719	0.733372		-4.30212	0.223161	1	1.80155	0.650392
NCU11095	A7UVW9	hypothetical protein	-1.29388	0.787687		0.949678	0.890756		-0.768777	0.869239	1	0	1
NCU00937	Q7SFB0	beta-glucuronidase	-1.29154	0.685124		0.719972	0.881953		-0.892038	0.775347	1	-0.564028	0.883567
NCU02613	Q7SG07	hypothetical protein	-1.2868	0.34431		1.072	0.551273		0.641982	0.64331	1	5.5518	0.00377107	0.0124621		Enriched GUL-1-GFP
NCU05894	Q7S514	hypothetical protein	-1.28537	0.710496		0.555532	0.912513		-0.685036	0.835941	1	-3.63285	0.330759
NCU16003	P00422	cytochrome c oxidase subunit 3	-1.28133	0.172413	0.527001	-2.5613	0.0485389	0.0980711	-1.57304	0.085404	1	-2.99121	0.00382344	0.0126158
NCU14046	#N/A		-1.27927	0.594358		1.90775	0.61645		-2.07607	0.382788	1	1.52962	0.603212
NCU00752	Q7SDS1	hypothetical protein	-1.2784	0.716356		1.99832	0.695855		-0.336017	0.927643	1	0.479421	0.90503
NCU04880	Q7S022	hypothetical protein	-1.27341	0.630952		2.2085	0.591938		0.453216	0.864123	1	-0.545363	0.868595
NCU08668	Q7S8W7	pre-rR-processing protein esf-2	-1.27087	0.603459		0.450937	0.907836		0.733891	0.753596	1	1.22685	0.682162
NCU09188	Q7S327	hypothetical protein	-1.2707	0.363212		2.46599	0.358552		-0.391422	0.760148	1	1.427	0.483401
NCU10673	V5IMY7	hypothetical protein	-1.27039	0.569632		2.7688	0.403251		-0.0849722	0.963966	1	2.27667	0.368525
NCU06750	Q7SCC7	coiled-coil domain-containing protein 25	-1.2699	0.421021		4.35489	0.129749		-1.29839	0.372388	1	4.0478	0.060841	0.105374
NCU07241	Q7RWA5	hypothetical protein	-1.26769	0.598262		3.04615	0.424594		2.13961	0.391837	1	0.171868	0.948264
NCU07004	Q7S864	hypothetical protein	-1.26632	0.378514		3.39964	0.22028		0.94972	0.502395	1	2.44655	0.241477	0.322532
NCU09380	Q7SCW4	pumilio domain-containing protein	-1.26519	0.497718		2.32868	0.464259		0.102965	0.953448	1	0.673254	0.78528
NCU02389	Q7S4P5	hypothetical protein	-1.26274	0.492132		2.56645	0.413369		-0.353616	0.834591	1	1.38469	0.565311	0.646295
NCU16754	V5INQ9	hypothetical protein	-1.26149	0.776853		0.123816	0.984661		0.819056	0.850103	1	0	1
NCU10392	A7UX31	hypothetical protein	-1.26005	0.18451		-1.08001	0.406129		-0.186295	0.835564	1	0.726243	0.54511	0.626947
NCU08946	Q1K6R7	hypothetical protein	-1.25841	0.00757625	0.113064	-0.348518	0.605514	0.71925	-0.284361	0.499948	1	-1.04013	0.0355073	0.0690789
NCU02909	Q7SHJ5	chitosase	-1.25166	0.608516		-0.156837	0.9674		0.0219755	0.992824	1	-1.74127	0.528633
NCU07008	Q7S860	carotenoid oxygese 1	-1.25157	0.77381		0.858387	0.89148		-0.897629	0.834413	1	1.79861	0.71466
NCU09518	Q7S1P7	glucooligosaccharide oxidase	-1.24803	0.722016		0.714263	0.891963		0.585536	0.869276	1	0.627955	0.878734
NCU08173	A7UX65	early conidial development-2 protein	-1.24375	0.213167	0.57021	-0.290137	0.835554	0.895363	-0.473259	0.604172	1	4.60472	0.00888207	0.0242115		Enriched GUL-1-GFP
NCU08925	Q1K6J2	amine oxidase	-1.24279	0.471623		3.95582	0.196861		-0.606026	0.717807	1	0.762797	0.702143	0.76814
NCU14068	#N/A		-1.24237	0.369971	0.71295	3.50845	0.195715	0.308047	-0.699652	0.579804	1	2.51047	0.217742	0.296138
NCU04208	Q1K7C9	hypothetical protein	-1.24192	0.488854		2.52684	0.399065		0.272224	0.871617	1	1.57467	0.491091
NCU04317	Q1K721	DUF431 domain-containing protein	-1.23739	0.579691		2.67203	0.462185		-1.24158	0.563912	1	0.648257	0.819318	0.863089
[truncated: 6,764 more rows]
